# Supplementary material for: Effects of maternal high-fat diet on fetal growth, placental nutrient transporters and circular RNA expression profiles
Source: Royal Society of Chemistry journal article supplement (doi:10.1039/d3fo02202a), 2023-01-01
Supplement: d3fo02202a1.xlsx [file d3fo02202a1.xlsx]

## Sheet: Production index
	Number	Feed /g（D1）	Surplus/g	Feed intake/g	Feed /g（D2）	Surplus/g	Feed intake/g	Feed /g（D3）	Surplus/g	Feed intake/g	Feed /g（D4）	Surplus/g	Feed intake/g	Feed /g（D5）	Surplus/g	Feed intake/g	Feed /g（D6）	Surplus/g	Feed intake/g	Feed /g（D7）	Surplus/g	Feed intake/g	Feed /g（D8）	Surplus/g	Feed intake/g	Feed /g（D9）	Surplus/g	Feed intake/g	Feed /g（D10）	Surplus/g	Feed intake/g	Feed /g（D11）	Surplus/g	Feed intake/g	Feed /g（D12）	Surplus/g	Feed intake/g	Feed /g（D13）	Surplus/g	Feed intake/g	Feed /g（D14）	Surplus/g	Feed intake/g	Feed /g（D15）	Surplus/g	Feed intake/g	Feed /g（D16）	Surplus/g	Feed intake/g
	2-1	8.65	5.36	3.29	6.33	3.21	3.12	7.18	4.02	3.16	7.07	3.86	3.21	5.19	2.28	2.91	4.73	1.32	3.41	6.22	3.25	2.97	9.05	5.86	3.19	6.34	3.25	3.09	7.09	3.86	3.23	6.67	3.46	3.21	7.17	3.86	3.31	5.29	2.28	3.01	5.06	1.64	3.42	8.77	5.56	3.21	6.65	3.86	2.79
	2-2	5.03	1.97	3.06	6.24	3.14	3.1	6.45	3.26	3.19	5.57	2.26	3.31	5.4	2.14	3.26	6.51	3.16	3.35	5.62	2.36	3.26	5.44	2.11	3.33	7.45	4.36	3.09	5.52	2.26	3.26	5.3	1.99	3.31	5.52	2.26	3.26	5.4	2.14	3.26	8.9	5.66	3.24	5.74	2.43	3.31	5.57	2.26	3.31
	2-3	8.15	4.99	3.16	6.28	3.11	3.17	5.54	2.31	3.23	5.99	2.68	3.31	6	2.73	3.27	7.09	3.84	3.25	6.29	3.24	3.05	8.52	5.32	3.2	6.54	3.24	3.3	6.07	2.68	3.39	7.84	4.63	3.21	5.6	2.68	2.92	5.85	2.73	3.12	8.95	5.63	3.32	8.76	5.45	3.31	5.94	2.68	3.26
	2-4	7.31	3.88	3.43	5.39	2.13	3.26	5.28	2.15	3.13	5.59	2.34	3.25	5.27	2.32	2.95	5.38	2.23	3.15	5.94	2.63	3.31	7.83	4.67	3.16	5.8	2.63	3.17	5.47	2.34	3.13	6.39	3.14	3.25	5.69	2.34	3.35	5.67	2.32	3.35	6.76	3.44	3.32	7.6	4.35	3.25	5.76	2.34	3.42
	2-5	6.9	3.71	3.19	5.64	2.36	3.28	6.46	3.41	3.05	5.5	2.23	3.27	5.3	2.15	3.15	6.21	3.11	3.1	5.04	1.76	3.28	6.89	3.71	3.18	4.96	1.76	3.2	5.33	2.23	3.1	7.66	4.39	3.27	5.38	2.23	3.15	5.3	2.15	3.15	8.5	5.34	3.16	7.68	4.41	3.27	5.86	2.23	3.63
	2-6	7.25	4.13	3.12	5.46	2.32	3.14	6.4	3.06	3.34	6.25	2.96	3.29	7.01	3.65	3.36	4.33	1.22	3.11	6.72	3.46	3.26	7.28	4.13	3.15	5.7	2.46	3.24	6.1	2.96	3.14	5.75	2.36	3.39	6.34	2.96	3.38	6.85	3.65	3.2	7.73	4.64	3.09	8.25	5.06	3.19	6.23	2.96	3.27
	2-7	7.48	4.32	3.16	5.43	2.14	3.29	6.04	2.84	3.2	5.25	2.34	2.91	6.76	3.49	3.27	4.77	1.89	2.88	5.64	2.39	3.25	7.35	4.32	3.03	5.61	2.39	3.22	5.43	2.34	3.09	6.29	3.28	3.01	5.58	2.34	3.24	6.95	3.49	3.46	5.49	2.1	3.39	8.45	5.34	3.11	5.55	2.34	3.21
	2-8	4.77	1.43	3.34	7	3.86	3.14	6.32	2.99	3.33	4.67	1.35	3.32	6.8	3.45	3.35	5.04	1.58	3.46	6.37	3.01	3.36	4.73	1.43	3.3	6.38	3.01	3.37	4.65	1.35	3.3	6.9	3.58	3.32	4.55	1.35	3.2	6.87	3.45	3.42	8.27	5.12	3.15	5.7	2.24	3.46	4.8	1.35	3.45
	2-9	7.33	4.18	3.15	4.33	1.13	3.2	6.33	3.11	3.22	6.85	3.56	3.29	6.15	2.94	3.21	7.74	4.39	3.35	5.54	2.31	3.23	7.41	4.18	3.23	5.49	2.31	3.18	6.75	3.56	3.19	7.83	4.59	3.24	6.79	3.56	3.23	6.18	2.94	3.24	8.05	4.74	3.31	8.11	4.83	3.28	6.9	3.56	3.34
	2-10	7.7	4.39	3.31	5.5	2.34	3.16	5.8	2.56	3.24	8.61	5.44	3.17	5.73	2.56	3.17	5.46	2.36	3.1	4.71	1.46	3.25	7.58	4.39	3.19	4.76	1.46	3.3	8.65	5.44	3.21	4.68	1.33	3.35	8.62	5.44	3.18	5.91	2.56	3.35	6.07	2.9	3.17	8.38	5.06	3.32	8.83	5.44	3.39
	2-11	5.58	2.36	3.22	5.34	2.11	3.23	5.93	2.84	3.09	7.11	3.99	3.12	4.73	1.53	3.2	6.42	3.28	3.14	6.74	3.55	3.19	5.57	2.36	3.21	6.75	3.55	3.2	7.21	3.99	3.22	7.26	4.15	3.11	7.18	3.99	3.19	4.71	1.53	3.18	6.39	3.13	3.26	5.6	2.23	3.37	7.21	3.99	3.22
	2-12	6.52	3.28	3.24	5.23	2.14	3.09	5.02	1.69	3.33	6.18	2.86	3.32	6.9	3.65	3.25	6.8	3.58	3.22	7.64	4.45	3.19	6.33	3.28	3.05	7.66	4.45	3.21	5.97	2.86	3.11	8.44	5.21	3.23	6.08	2.86	3.22	6.88	3.65	3.23	7.71	4.39	3.32	5.51	2.33	3.18	6.21	2.86	3.35
	2-13	6.77	3.58	3.19	5.55	2.34	3.21	5.12	1.89	3.23	5.87	2.53	3.34	8.4	5.27	3.13	7.83	4.59	3.24	7.56	4.35	3.21	6.79	3.58	3.21	7.54	4.35	3.19	5.83	2.53	3.3	3.52	0.33	3.19	5.77	2.53	3.24	8.52	5.27	3.25	5.35	2.16	3.19	7.26	3.89	3.37	5.78	2.53	3.25
	2-14	7.8	4.59	3.21	5.75	2.53	3.22	5.28	2.14	3.14	6.02	2.86	3.16	7.81	4.63	3.18	4.56	1.33	3.23	5.38	2.19	3.19	7.86	4.59	3.27	5.37	2.19	3.18	6.06	2.86	3.2	6.36	2.99	3.37	6.16	2.86	3.3	7.86	4.63	3.23	6.59	3.28	3.31	6.54	3.49	3.05	6.07	2.86	3.21
	3-1	10.09	6.86	3.23	7.59	4.23	3.36	7.22	3.66	3.56	6.03	2.85	3.18	5.47	2.36	3.11	6.16	2.86	3.3	6.26	2.99	3.27	7.54	4.23	3.31	7.52	4.23	3.29	5.56	2.36	3.2	8	4.63	3.37	6.12	2.85	3.27	5.77	2.36	3.41	7.57	4.24	3.33	7.52	4.23	3.29	6.33	2.85	3.48
	3-2	10.32	6.99	3.33	6.86	3.47	3.39	5.76	2.65	3.11	5.62	2.44	3.18	7.02	3.54	3.48	7.98	4.51	3.47	6.98	3.78	3.2	7.43	3.47	3.96	6.9	3.47	3.43	7.01	3.54	3.47	8.84	5.38	3.46	5.71	2.44	3.27	6.92	3.54	3.38	6.77	3.35	3.42	7.43	3.47	3.96	5.92	2.44	3.48
	3-3	10.23	6.86	3.37	6.88	3.63	3.25	5.73	2.61	3.12	5.93	2.56	3.37	6.08	2.65	3.43	6.09	2.53	3.56	5.68	2.49	3.19	6.98	3.63	3.35	7.45	3.63	3.82	6.17	2.65	3.52	8.39	5.25	3.14	6.02	2.56	3.46	6.08	2.65	3.43	6.41	3.01	3.4	6.94	3.63	3.31	5.93	2.56	3.37
	3-4	10.31	6.96	3.35	6.34	2.99	3.35	7.88	4.73	3.15	8.1	4.85	3.25	6.69	3.24	3.45	6.9	3.54	3.36	5.98	2.66	3.32	6.4	2.99	3.41	6.28	2.99	3.29	6.7	3.24	3.46	5.4	1.97	3.43	8.19	4.85	3.34	6.63	3.24	3.39	5.7	2.36	3.34	6.31	2.99	3.32	8.11	4.85	3.26
	3-5	10.616	7.286	3.33	5.41	2.13	3.28	5.87	2.63	3.24	5.67	2.39	3.28	6.56	3.31	3.25	5.12	2.36	2.76	7.54	4.23	3.31	5.39	2.13	3.26	5.48	2.13	3.35	6.65	3.31	3.34	8.03	4.63	3.4	5.76	2.39	3.37	6.72	3.31	3.41	9.01	5.64	3.37	5.39	2.13	3.26	5.72	2.39	3.33
	3-6	10.29	6.99	3.3	7.65	4.31	3.34	6.94	3.78	3.16	5.86	2.51	3.35	6.48	3.41	3.07	6.22	2.78	3.44	6.84	3.46	3.38	7.73	4.31	3.42	7.82	4.31	3.51	6.57	3.41	3.16	7.38	3.98	3.4	5.95	2.51	3.44	6.8	3.41	3.39	9.25	5.87	3.38	7.57	4.31	3.26	5.89	2.51	3.38
	3-7	10.32	6.95	3.37	6.65	3.24	3.41	6.18	2.69	3.49	7.77	4.46	3.31	7.67	4.26	3.41	6.74	3.34	3.4	6.95	3.56	3.39	6.53	3.24	3.29	7.04	3.24	3.8	7.69	4.26	3.43	5.06	1.6	3.46	7.86	4.46	3.4	7.49	4.26	3.23	8.45	5.02	3.43	6.55	3.24	3.31	7.73	4.46	3.27
	3-8	10.73	7.34	3.39	6.76	3.35	3.41	6.64	3.29	3.35	6.17	2.76	3.41	6.97	3.61	3.36	6.69	3.35	3.34	7.16	3.76	3.4	6.74	3.35	3.39	5.67	3.35	2.32	6.98	3.61	3.37	4.79	1.43	3.36	6.26	2.76	3.5	7.03	3.61	3.42	7.06	3.64	3.42	6.74	3.35	3.39	6.15	2.76	3.39
	3-9	10.19	6.79	3.4	6.7	3.34	3.36	5.71	2.11	3.6	6.9	3.56	3.34	7.82	4.43	3.39	5.29	1.83	3.46	7.11	3.65	3.46	6.35	3.34	3.01	8.61	5.34	3.27	7.91	4.43	3.48	10.39	7.02	3.37	6.99	3.56	3.43	7.69	4.43	3.26	8.02	4.66	3.36	6.5	3.34	3.16	6.93	3.56	3.37
	3-10	10.15	6.86	3.29	5.73	2.34	3.39	7.18	3.76	3.42	5.21	1.68	3.53	5.4	1.98	3.42	7.11	3.86	3.25	7.18	3.88	3.3	5.62	2.34	3.28	5.66	2.34	3.32	5.3	1.98	3.32	9.54	6.38	3.16	5.1	1.68	3.42	5.35	1.98	3.37	8.13	4.73	3.4	5.75	2.34	3.41	4.99	1.68	3.31
	3-11	9.32	5.97	3.35	8	4.63	3.37	6.58	3.35	3.23	5.94	2.65	3.29	6.79	3.45	3.34	8.94	5.64	3.3	7.99	4.64	3.35	8.05	4.63	3.42	7.97	4.63	3.34	6.81	3.45	3.36	9.92	6.54	3.38	6.06	2.65	3.41	6.8	3.45	3.35	7.56	4.15	3.41	8.03	4.63	3.4	6.05	2.65	3.4
	3-12	10.2	6.88	3.32	9.19	5.93	3.26	7.39	4.05	3.34	6.9	3.56	3.34	5.68	2.46	3.22	8.05	4.76	3.29	7.62	4.31	3.31	9.31	5.93	3.38	9.25	5.93	3.32	5.82	2.46	3.36	10	6.67	3.33	6.99	3.56	3.43	5.85	2.46	3.39	6.47	3.11	3.36	9.31	5.93	3.38	6.94	3.56	3.38
	3-13	9.83	6.52	3.31	8.63	5.34	3.29	7.86	4.35	3.51	5.92	2.61	3.31	6.77	3.44	3.33	6.77	3.36	3.41	7.51	4.19	3.32	8.68	5.34	3.34	6.82	3.46	3.36	6.89	3.44	3.45	9.9	6.56	3.34	5.99	2.61	3.38	6.8	3.44	3.36	6.41	3.01	3.4	8.69	5.34	3.35	5.95	2.61	3.34
	3-14	10.31	6.94	3.37	6.95	3.64	3.31	5.93	2.69	3.24	5.97	2.63	3.34	6.14	2.68	3.46	8.1	4.77	3.33	6.77	3.46	3.31	6.97	3.64	3.33	6.98	3.64	3.34	6.01	2.68	3.33	5.76	2.39	3.37	5.97	2.63	3.34	6.06	2.68	3.38	8.83	5.46	3.37	6.98	3.64	3.34	5.97	2.63	3.34
	CON Feed intake															CON Energy intake
	Time/day	2-1	2-2	2-3	2-4	2-5	2-6	2-7	2-8	2-9	2-10	2-11	2-12	2-13	2-14	Time/day	2-1	2-2	2-3	2-4	2-5	2-6	2-7	2-8	2-9	2-10	2-11	2-12	2-13	2-14
	D1	3.29	3.06	3.16	3.43	3.19	3.12	3.16	3.34	3.15	3.31	3.22	3.24	3.19	3.21	D1	12.6665	11.781	12.166	13.2055	12.2815	12.012	12.166	12.859	12.1275	12.7435	12.397	12.474	12.2815	12.3585
	2	3.12	3.1	3.17	3.26	3.28	3.14	3.29	3.14	3.2	3.16	3.23	3.09	3.21	3.22	2	12.012	11.935	12.2045	12.551	12.628	12.089	12.6665	12.089	12.32	12.166	12.4355	11.8965	12.3585	12.397
	3	3.16	3.19	3.23	3.13	3.05	3.34	3.2	3.33	3.22	3.24	3.09	3.33	3.23	3.14	3	12.166	12.2815	12.4355	12.0505	11.7425	12.859	12.32	12.8205	12.397	12.474	11.8965	12.8205	12.4355	12.089
	4	3.21	3.31	3.31	3.25	3.27	3.29	2.91	3.32	3.29	3.17	3.12	3.32	3.34	3.16	4	12.3585	12.7435	12.7435	12.5125	12.5895	12.6665	11.2035	12.782	12.6665	12.2045	12.012	12.782	12.859	12.166
	5	2.91	3.26	3.27	2.95	3.15	3.36	3.27	3.35	3.21	3.17	3.2	3.25	3.13	3.18	5	11.2035	12.551	12.5895	11.3575	12.1275	12.936	12.5895	12.8975	12.3585	12.2045	12.32	12.5125	12.0505	12.243
	6	3.41	3.35	3.25	3.15	3.1	3.11	2.88	3.46	3.35	3.1	3.14	3.22	3.24	3.23	6	13.1285	12.8975	12.5125	12.1275	11.935	11.9735	11.088	13.321	12.8975	11.935	12.089	12.397	12.474	12.4355
	7	2.97	3.26	3.05	3.31	3.28	3.26	3.25	3.36	3.23	3.25	3.19	3.19	3.21	3.19	7	11.4345	12.551	11.7425	12.7435	12.628	12.551	12.5125	12.936	12.4355	12.5125	12.2815	12.2815	12.3585	12.2815
	8	3.19	3.33	3.2	3.16	3.18	3.15	3.03	3.3	3.23	3.19	3.21	3.05	3.21	3.27	8	12.2815	12.8205	12.32	12.166	12.243	12.1275	11.6655	12.705	12.4355	12.2815	12.3585	11.7425	12.3585	12.5895
	9	3.09	3.09	3.3	3.17	3.2	3.24	3.22	3.37	3.18	3.3	3.2	3.21	3.19	3.18	9	11.8965	11.8965	12.705	12.2045	12.32	12.474	12.397	12.9745	12.243	12.705	12.32	12.3585	12.2815	12.243
	10	3.23	3.26	3.39	3.13	3.1	3.14	3.09	3.3	3.19	3.21	3.22	3.11	3.3	3.2	10	12.4355	12.551	13.0515	12.0505	11.935	12.089	11.8965	12.705	12.2815	12.3585	12.397	11.9735	12.705	12.32
	11	3.21	3.31	3.21	3.25	3.27	3.39	3.01	3.32	3.24	3.35	3.11	3.23	3.19	3.37	11	12.3585	12.7435	12.3585	12.5125	12.5895	13.0515	11.5885	12.782	12.474	12.8975	11.9735	12.4355	12.2815	12.9745
	12	3.31	3.26	2.92	3.35	3.15	3.38	3.24	3.2	3.23	3.18	3.19	3.22	3.24	3.3	12	12.7435	12.551	11.242	12.8975	12.1275	13.013	12.474	12.32	12.4355	12.243	12.2815	12.397	12.474	12.705
	13	3.01	3.26	3.12	3.35	3.15	3.2	3.46	3.42	3.24	3.35	3.18	3.23	3.25	3.23	13	11.5885	12.551	12.012	12.8975	12.1275	12.32	13.321	13.167	12.474	12.8975	12.243	12.4355	12.5125	12.4355
	14	3.42	3.24	3.32	3.32	3.16	3.09	3.39	3.15	3.31	3.17	3.26	3.32	3.19	3.31	14	13.167	12.474	12.782	12.782	12.166	11.8965	13.0515	12.1275	12.7435	12.2045	12.551	12.782	12.2815	12.7435
	15	3.21	3.31	3.31	3.25	3.27	3.19	3.11	3.46	3.28	3.32	3.37	3.18	3.37	3.05	15	12.3585	12.7435	12.7435	12.5125	12.5895	12.2815	11.9735	13.321	12.9745	12.782	#REF!	12.243	12.9745	11.7425
	16	2.79	3.31	3.26	3.42	3.63	3.27	3.21	3.45	3.34	3.39	3.22	3.35	3.25	3.21	16	10.7415	12.7435	12.551	13.167	13.9755	12.5895	12.3585	13.2825	12.859	13.0515	12.397	12.8975	12.5125	12.3585
	17	3.21	3.31	3.41	3.25	3.27	3.29	3.11	3.22	3.28	3.25	3.2	3.23	3.3	3.29	17	12.3585	12.7435	13.1285	12.5125	12.5895	12.6665	11.9735	12.397	12.628	12.5125	12.32	12.4355	12.705	12.6665
	18	3.14	2.96	3.19	3.37	3.06	3.6	3.46	3.49	3.32	3.23	3.25	3.19	3.37	3.34	18	12.089	11.396	12.2815	12.9745	11.781	13.86	13.321	13.4365	12.782	12.4355	12.5125	12.2815	12.9745	12.859
	HFD Feed intake															HFD Energy intake
		3-1	3-2	3-3	3-4	3-5	3-6	3-7	3-8	3-9	3-10	3-11	3-12	3-13	3-14		3-1	3-2	3-3	3-4	3-5	3-6	3-7	3-8	3-9	3-10	3-11	3-12	3-13	3-14
	D1	3.23	3.33	3.37	3.35	3.33	3.3	3.37	3.39	3.4	3.29	3.35	3.32	3.31	3.37		16.9252	17.4492	17.6588	17.554	17.4492	17.292	17.6588	17.7636	17.816	17.2396	17.554	17.3968	17.3444	17.6588
	2	3.36	3.39	3.25	3.35	3.28	3.34	3.41	3.41	3.36	3.39	3.37	3.26	3.29	3.31		17.6064	17.7636	17.03	17.554	17.1872	17.5016	17.8684	17.8684	17.6064	17.7636	17.6588	17.0824	17.2396	17.3444
	3	3.56	3.11	3.12	3.15	3.24	3.16	3.49	3.35	3.6	3.42	3.23	3.34	3.51	3.24		18.6544	16.2964	16.3488	16.506	16.9776	16.5584	18.2876	17.554	18.864	17.9208	16.9252	17.5016	18.3924	16.9776
	4	3.18	3.18	3.37	3.25	3.28	3.35	3.31	3.41	3.34	3.53	3.29	3.34	3.31	3.34		16.6632	16.6632	17.6588	17.03	17.1872	17.554	17.3444	17.8684	17.5016	18.4972	17.2396	17.5016	17.3444	17.5016
	5	3.11	3.48	3.43	3.45	3.25	3.07	3.41	3.36	3.39	3.42	3.34	3.22	3.33	3.46		16.2964	18.2352	17.9732	18.078	17.03	16.0868	17.8684	17.6064	17.7636	17.9208	17.5016	16.8728	17.4492	18.1304
	6	3.3	3.47	3.56	3.36	2.76	3.44	3.4	3.34	3.46	3.25	3.3	3.29	3.41	3.33		17.292	18.1828	18.6544	17.6064	14.4624	18.0256	17.816	17.5016	18.1304	17.03	17.292	17.2396	17.8684	17.4492
	7	3.27	3.2	3.19	3.32	3.31	3.38	3.39	3.4	3.46	3.3	3.35	3.31	3.32	3.31		17.1348	16.768	16.7156	17.3968	17.3444	17.7112	17.7636	17.816	18.1304	17.292	17.554	17.3444	17.3968	17.3444
	8	3.31	3.96	3.35	3.41	3.26	3.42	3.29	3.39	3.01	3.28	3.42	3.38	3.34	3.33		17.3444	20.7504	17.554	17.8684	17.0824	17.9208	17.2396	17.7636	15.7724	17.1872	17.9208	17.7112	17.5016	17.4492
	9	3.29	3.43	3.82	3.29	3.35	3.51	3.8	2.32	3.27	3.32	3.34	3.32	3.36	3.34		17.2396	17.9732	20.0168	17.2396	17.554	18.3924	19.912	12.1568	17.1348	17.3968	17.5016	17.3968	17.6064	17.5016
	10	3.2	3.47	3.52	3.46	3.34	3.16	3.43	3.37	3.48	3.32	3.36	3.36	3.45	3.33		16.768	18.1828	18.4448	18.1304	17.5016	16.5584	17.9732	17.6588	18.2352	17.3968	17.6064	17.6064	18.078	17.4492
	11	3.37	3.46	3.14	3.43	3.4	3.4	3.46	3.36	3.37	3.16	3.38	3.33	3.34	3.37		17.6588	18.1304	16.4536	17.9732	17.816	17.816	18.1304	17.6064	17.6588	16.5584	17.7112	17.4492	17.5016	17.6588
	12	3.27	3.27	3.46	3.34	3.37	3.44	3.4	3.5	3.43	3.42	3.41	3.43	3.38	3.34		17.1348	17.1348	18.1304	17.5016	17.6588	18.0256	17.816	18.34	17.9732	17.9208	17.8684	17.9732	17.7112	17.5016
	13	3.41	3.38	3.43	3.39	3.41	3.39	3.23	3.42	3.26	3.37	3.35	3.39	3.36	3.38		17.8684	17.7112	17.9732	17.7636	17.8684	17.7636	16.9252	17.9208	17.0824	17.6588	17.554	17.7636	17.6064	17.7112
	14	3.33	3.42	3.4	3.34	3.37	3.38	3.43	3.42	3.36	3.4	3.41	3.36	3.4	3.37		17.4492	17.9208	17.816	17.5016	17.6588	17.7112	17.9732	17.9208	17.6064	17.816	17.8684	17.6064	17.816	17.6588
	15	3.29	3.96	3.31	3.32	3.26	3.26	3.31	3.39	3.16	3.41	3.4	3.38	3.35	3.34		17.2396	20.7504	17.3444	17.3968	17.0824	17.0824	17.3444	17.7636	16.5584	17.8684	17.816	17.7112	17.554	17.5016
	16	3.48	3.48	3.37	3.26	3.33	3.38	3.27	3.39	3.37	3.31	3.4	3.38	3.34	3.34		18.2352	18.2352	17.6588	17.0824	17.4492	17.7112	17.1348	17.7636	17.6588	17.3444	17.816	17.7112	17.5016	17.5016
	17	3.36	3.37	3.39	3.39	3.4	3.4	3.32	3.33	3.39	3.36	3.38	3.39	3.37	3.34		17.6064	17.6588	17.7636	17.7636	17.816	17.816	17.3968	17.4492	17.7636	17.6064	17.7112	17.7636	17.6588	17.5016
	18	3.41	3.38	3.43	3.35	3.35	3.37	3.39	3.43	3.4	3.42	3.37	3.41	3.42	3.37		17.8684	17.7112	17.9732	17.554	17.554	17.6588	17.7636	17.9732	17.816	17.9208	17.6588	17.8684	17.9208	17.6588
		Mating weight/		Final weight/		Average daily gain/		Fasting blood-glucose		Tibialis anterior muscle/		Gastrocnemius muscle/		Back fat/g		Abdominal fat/g		Intestinal weight/g
		CON	HFD	CON	HFD	CON	HFD	CON	HFD	CON	HFD	CON	HFD	CON	HFD	CON	HFD	CON	HFD
		22.02	25.18	32.19	41.07	0.565	0.882778	5.2	9.3	0.16	0.18	0.31	0.38	1.34	1.05	0.93	3.46	2.47	2.72
		22.53	24.7	33.3	39.27	0.598333	0.809444	6.7	9.5	0.08	0.09	0.33	0.4	0.92	1.84	1.02	3.73	2.72	2.72
		21.62	29.76	32.35	41.96	0.596111	0.677778	5.4	9.6	0.09	0.09	0.3	0.36	0.93	2.02	1.24	3.95	2.51	2.75
		19.86	27.28	29.15	39.1	0.516111	0.656667	5.5	10.2	0.11	0.09	0.31	0.3	0.96	1.68	1.17	3.54	2.66	2.38
		18.13	25.64	33.42	39.66	0.849444	0.778889	8.1	8.9	0.1	0.1	0.34	0.34	1.05	1.21	1.2	3.59	3	2.5	（n=14）
		20.8	26.43	33.55	42.23	0.708333	0.877778	6.7	8.8	0.11	0.12	0.29	0.37	0.92	2.08	1.61	4.59	2.69	3.04
		21.82	28.35	30.85	39.74	0.501667	0.632778	6.8	9.1	0.11	0.09	0.3	0.32	1.36	1.23	1.33	4.5	2.79	3
		21.9	23.02	32.46	37.24	0.586667	0.79	7.5	8.4	0.11	0.1	0.38	0.3	0.96	1.88	1.08	5.91	2.35	3.09
		21.95	23.53	33.32	41.47	0.631667	0.996667	6.65	8.5	0.14	0.19	0.35	0.29	0.93	1.45	1.2	3.76	2.75	2.68
		21.44	26.46	33.13	38.89	0.649444	0.690556	6.67	8.5	0.13	0.11	0.29	0.32	0.98	1.31	1.18	3.67	2.58	2.35
		21.18	25.89	31.89	38.22	0.595	0.685	6.42	9.24	0.12	0.12	0.33	0.33	1.02	1.02	1.25	4.25	2.84	2.48
		20.89	26.17	30.97	38.96	0.56	0.710556	5.88	8.89	0.12	0.11	0.3	0.35	1.07	1.12	1.15	3.93	2.63	2.74
		21.14	25.89	33.19	38.1	0.669444	0.678333	7.14	9.1	0.13	0.13	0.29	0.34	1.12	1.13	1.28	3.79	2.58	2.66
		21.23	26.25	32.26	38.21	0.612778	0.664444	6.5	9.09	0.09	0.12	0.33	0.33	1.01	1.18	1.16	4.31	2.67	3.01
		Heart/g	Liver/g	Spleen/g	Lung/g	Kidney/g	Organ index	Heart index	Liver index	Spleen index	Lung index	Kidney index
	2-1	0.22	1.46	0.12	0.21	0.34		0.00683442	0.0453557	0.00372787	0.00652377	0.0105623
	2-2	0.22	1.62	0.08	0.21	0.33		0.00660661	0.0486486	0.0024024	0.00630631	0.00990991
	2-3	0.19	1.84	0.09	0.15	0.36		0.00587326	0.0568779	0.00278207	0.00463679	0.0111283
	2-4	0.26	1.82	0.15	0.19	0.36		0.00891938	0.0624357	0.0051458	0.00651801	0.0123499
	2-5	0.15	1.72	0.22	0.24	0.34		0.00448833	0.0514662	0.00658288	0.00718133	0.0101735
	2-6	0.21	1.67	0.15	0.15	0.35		0.00625931	0.0497765	0.00447094	0.00447094	0.0104322
	2-7	0.21	1.65	0.12	0.18	0.32		0.00680713	0.0534846	0.00388979	0.00583468	0.0103728
	2-8	0.18	1.73	0.23	0.18	0.33		0.00554529	0.0532964	0.00708564	0.00554529	0.0101664
	2-9	0.21	1.68	0.19	0.2	0.38		0.00630252	0.0504202	0.00570228	0.0060024	0.0114046
	2-10	0.21	1.68	0.15	0.18	0.36		0.00633867	0.0507093	0.00452762	0.00543314	0.0108663
	2-11	0.19	1.71	0.15	0.19	0.35		0.00595798	0.0536218	0.00470367	0.00595798	0.0109752
	2-12	0.21	1.73	0.17	0.21	0.34		0.00678076	0.0558605	0.00548918	0.00678076	0.0109784
	2-13	0.2	1.66	0.13	0.2	0.33		0.00602591	0.0500151	0.00391684	0.00602591	0.00994275
	2-14	0.22	1.65	0.15	0.17	0.35		0.00681959	0.0511469	0.00464972	0.00526968	0.0108493
	3-1	0.18	1.93	0.15	0.22	0.38		0.00438276	0.0469929	0.0036523	0.00535671	0.0092525
	3-2	0.17	1.47	0.14	0.22	0.4		0.004329	0.0374332	0.00356506	0.00560224	0.0101859
	3-3	0.21	1.72	0.09	0.22	0.34		0.00500477	0.0409914	0.0021449	0.00524309	0.00810296
	3-4	0.19	1.65	0.14	0.24	0.36		0.00485934	0.0421995	0.00358056	0.00613811	0.00920716
	3-5	0.23	1.83	0.21	0.21	0.42		0.00579929	0.0461422	0.00529501	0.00529501	0.01059
	3-6	0.35	1.87	0.17	0.18	0.38		0.00828795	0.0442813	0.00402557	0.00426237	0.00899834
	3-7	0.16	1.56	0.12	0.2	0.38		0.00402617	0.0392552	0.00301963	0.00503271	0.00956215
	3-8	0.22	1.75	0.16	0.22	0.3		0.00590763	0.0469925	0.00429646	0.00590763	0.00805585
	3-9	0.18	1.84	0.12	0.17	0.37		0.00434049	0.0443694	0.00289366	0.00409935	0.00892211
	3-10	0.19	1.74	0.09	0.23	0.32		0.00488557	0.0447416	0.00231422	0.00591412	0.00822834
	3-11	0.23	1.74	0.13	0.22	0.41		0.00601779	0.0455259	0.00340136	0.00575615	0.0107274
	3-12	0.21	1.72	0.14	0.19	0.38		0.00539014	0.0441478	0.00359343	0.0048768	0.00975359
	3-13	0.18	1.69	0.15	0.23	0.3		0.00472441	0.044357	0.00393701	0.00603675	0.00787402
	3-14	0.21	1.8	0.14	0.2	0.37		0.00549594	0.0471081	0.00366396	0.00523423	0.00968333
	Blood index
	TG		TC		FFA		Leptin		CG		INS		LDL		HDL		ADP
	CON	HFD	CON	HFD	CON	HFD	CON	HFD	CON	HFD	CON	HFD	CON	HFD	CON	HFD	CON	HFD
	3.87034	6.44298	1.94189	4.792	119.84	164.033	2.91023	5.4615	3.74707	6.54366	32.84	60.92	0.391895	1.302	5.39834	6.792	191.402	162.638
	3.9846	6.64294	1.90538	4.755	115.153	167.25	3.00089	5.42657	3.72871	6.42502	32.34	70.67	0.35538	1.265	4.62363	5.755	192.365	162.601
	3.98719	6.24562	1.87726	4.727	113.643	159.743	2.94163	5.40053	3.55499	6.6397	33.34	67.58	0.32726	1.237	4.88281	5.727	193.337	162.573
	3.53924	6.12357	1.94651	4.797	133.026	158.552	2.50252	5.76253	3.44341	5.40669	27.67	72.26	0.396512	1.307	5.99268	5.797	190.406	158.643
	3.44965	6.23653	2.00611	4.856	134.257	166.773	2.58344	5.67453	3.19059	5.37703	28.69	74.21	0.456111	1.366	4.81996	6.856	190.466	158.702
	3.4107	6.27938	1.95701	4.807	131.12	149.099	2.52684	5.78553	3.55075	5.20048	29.74	67.67	0.407004	1.317	5.63465	4.807	188.417	158.653
	3.54292	6.15733	1.94357	4.794	136.323	144.65	2.64756	5.56453	3.88831	5.62278	35.14	74.47	0.393574	1.304	4.14545	5.794	187.403	168.64
	4.49488	5.95608	2.00527	4.855	137.236	143.419	2.68338	5.52053	3.62419	5.76261	33.35	66.68	0.455271	1.365	5.89091	7.855	189.465	168.701
	4.41178	6.27159	1.95239	4.802	134.456	138.335	2.68294	5.48553	3.80074	5.47024	32.66	70.94	0.402388	1.312	4.20379	6.8402	189.412	168.648
	3.61065	6.29886	1.69007	4.54	136.084	147.788	2.82046	5.56653	4.01966	5.47731	27.67	67.26	0.140069	1.05	5.76275	6.54	175.15	160.386
	3.79763	6.45597	1.65691	4.507	130.087	154.699	2.87928	5.63043	4.15949	5.55075	28.69	74.21	0.106912	1.017	5.68166	6.507	175.117	160.353
	3.70933	6.23913	1.69427	4.544	140.454	149.129	2.82223	5.57736	4.02813	5.28381	29.74	77.67	0.144266	1.054	5.87779	5.544	178.154	145.224
	3.43407	6.21057	1.75261	4.603	148.397	148.335	2.75104	5.43011	3.54228	5.03664	31.14	72.47	0.202606	1.113	6.19414	3.603	178.212	145.449
	3.28864	6.01061	1.69553	4.546	143.79	153.37	2.73866	5.47035	3.3742	4.94907	33.35	68.68	0.145526	1.056	6.17684	5.546	178.155	145.392
			GTT (n=6)
	Fasting Insulin		The area under the curve		Blood glucose		Insulin resistance index			GTT (n=6)
	CON	HFD	CON	HFD	CON	HFD	CON	HFD		Time/min	CON						HFD
	3.1	7.12	1796	2445	5.1	8.6	0.702667	2.72142		0	5.65	5.56	5.49	5.67	6.12	5.89	8.21	8.35	8.12	8.19	8.39	8.24
	3.11	7.12	1814	2486	5.2	8.8	0.718756	2.78471		15	13.65	13.84	13.67	14.02	14.14	12.99	19.35	20.49	19.62	18.34	18.61	18.22
	3.41	7.33	1839	2457	4.9	8.4	0.742622	2.73653		30	19.76	20.18	20.67	18.89	19.67	20.36	27.54	26.87	28.35	28.1	26.98	27.39
	2.54	7.64	1818	2428	4.8	7.9	0.541867	2.68249		60	21.11	22.21	21.15	21.63	21.42	20.81	28.93	29.35	29.61	28.14	27.95	28.33
	2.73	7.15	1847	2372	5.2	8.3	0.630933	2.63756		90	12.35	11.69	13.24	12.58	13.14	11.91	15.06	16.21	14.85	16.25	14.89	18.81
	2.98	7.09	1772	2497	4.9	8.3	0.648978	2.61542		120	6.67	6.24	6.38	7.62	7.33	6.21	10.24	9.65	8.67	8.49	9.21	8.78
[truncated: 6 more columns]

## Sheet: mRNA expression
					Maternal placenta mRNA expression - Corrected data
		CON						HFD
	IGF-II	1.02876	1.10644	0.938946	1.02432	0.914354	0.98772	2.24462	2.23522	2.27645	2.29121	2.3724	2.01549
	Stat3	1.01487	1.02845	1.01121	1.02124	1.01145	1.02241	2.11586	2.2134	2.69316	2.42882	2.59234	2.54881
	Slc2a1	0.961855	0.951256	1.03644	1.01498	1.00795	1.02547	1.53696	1.42505	1.45819	1.45348	1.4611	1.46261
	Slc2a3	0.946944	0.950254	1.01544	1.02361	1.04976	1.00246	1.77976	1.81542	1.77894	1.73541	1.74675	1.77456
	Slc38al	0.949464	0.916481	1.03462	1.02547	1.0147	1.06245	1.13873	1.14065	1.06843	1.07133	1.1017	1.07183
	Slc38a2	0.945625	1.12264	1.14078	1.14163	0.820861	0.878614	1.21154	1.11346	1.19124	1.18415	1.17451	1.18464
	Slc38a4	1.01178	1.07214	1.09121	1.03211	0.90561	0.899415	1.15105	1.15297	1.08075	1.08366	1.11402	1.08415
	Slc7al	0.972546	0.964451	1.03065	1.01478	1.04025	1.04231	1.0731	0.935431	0.856675	1.01576	0.945675	0.982331
	SLC27A1	0.784557	0.824521	1.10541	1.08424	0.87201	1.36512	1.47554	1.38545	1.44245	1.50024	1.37945	1.3701
	FABP3	1.01487	1.02845	1.01121	1.02124	1.01145	1.02241	1.43254	1.42642	1.45154	1.54414	1.43121	1.52424
	FATP4	0.961855	0.951256	1.03644	1.01498	1.00795	1.02547	1.72654	1.7109	1.68792	1.67791	1.71474	1.73453
	CD36	0.949464	0.916481	1.02124	1.01145	1.02241	1.06245	1.19124	1.18415	1.17451	1.20024	1.27945	1.3701
	H19	1.02178	1.07214	1.09121	1.07211	0.90561	0.984145	0.598059	0.581769	0.579779	0.580562	0.5662	0.52211
					Fetal liver mRNA expression - corrected data
		CON						HFD
	IGF-II	1.07214	1.10644	0.938946	1.02241	1.01145	0.98424	1.36241	1.35302	1.39425	1.38901	1.3902	1.43329
	Stat3	1.01264	1.02845	1.01121	0.98772	0.914354	1.01478	1.16966	1.16072	1.1537	1.18262	1.19615	1.15026
	Slc2a1	0.964451	1.12845	1.11121	1.03644	1.02547	0.987795	1.34716	1.23525	1.26839	1.26368	1.2713	1.27281
	Slc2a3	0.824521	0.951256	1.02241	1.01145	1.01498	1.02361	1.45566	1.49132	1.45484	1.41131	1.42265	1.45046
	Slc38al	0.951256	0.916481	1.02124	1.06245	1.02241	1.02547	1.07464	1.10901	1.13602	1.02601	0.986284	1.18263
	Slc38a2	0.950254	1.02876	1.09121	0.984145	0.90561	1.03211	1.05364	0.946545	1.12691	1.01264	0.984185	1.0325
	Slc38a4	0.994024	0.984874	1.03065	1.12124	0.972546	1.14231	1.12976	1.14347	1.14148	1.14226	1.1279	1.08381
	Slc7al	1.13563	1.01487	1.04079	1.02432	0.920861	0.987861	1.0876	1.01699	1.07912	1.09503	1.08802	1.09168
	SLC27A1	0.97201	0.961855	1.00541	1.02124	0.884557	1.16512	1.19808	1.16799	1.08499	1.22278	1.10199	1.19264
	FABP3	1.00795	0.949464	1.03644	1.01498	0.961855	1.02547	1.25508	1.24896	1.27408	1.24667	1.25375	1.31678
	FATP4	1.04976	1.02178	1.01544	1.01145	0.946944	1.00246	1.54908	1.53344	1.51046	1.50045	1.53728	1.45707
	CD36	1.0147	0.916481	1.03462	1.07211	0.949464	1.06245	1.21378	1.28669	1.29705	1.26278	1.20199	1.29264
	H19	0.90561	1.07214	1.09121	1.14163	1.01178	0.899415	0.408259	0.391969	0.389979	0.390762	0.3764	0.33231

## Sheet: WB
	抗体名	产 地	货 号	分子量（KD）	种 属	一抗稀释比	分离胶浓度	封 闭	二抗稀释比
	ACTIN	Servicebio	GB12001	42	Mouse	1: 3000	0.1	5%脱脂奶粉	1：5000
	IGF2	正能生物	820814	20（17）	Rabbit	1: 1000	0.1	5%脱脂奶粉	1：5000
	蛋白上样量
	标本号	1-2	2-6	3-4	1-7	2-8	3-10	1-18	2-13	3-20
	上样量(μl)	5	5	5.5	8	9	7.5	6.5	5.5	8.5
	标本灰度值（以AlphaEase FC软件取值。灰度值取值误差较大，以下数据仅供参考！）
	Strip gray value				Ratio of the gray value of the target strip to the gray value of the internal reference strip
	标本号	ACTIN	IGF2			IGF2
	1-2	394060	106875		1-2	0.271215
	1-4	358937	126270		1-4	0.351789
	1-6	408456	85800		1-6	0.210059
	2-7	376915	168168		2-7	0.44617
	3-8	405314	216000		3-8	0.53292
	3-10	391867	213435		3-10	0.544662
	2-11	415480	118726		2-11	0.285756
	2-13	373520	142800		2-13	0.382309
	3-14	385826	216108		3-14	0.560118
				条带灰度值	标本号	1-2	1-4	1-6	2-7	3-8	3-10	2-11	2-13	3-14
					ACTIN	394060	358937	408456	376915	405314	391867	415480	373520	385826
					IGF2	106875	126270	85800	168168	216000	213435	118726	142800	216108
