# Supplementary material for: Effects of maternal high-fat diet on fetal growth, placental nutrient transporters and circular RNA expression profiles
Source: Royal Society of Chemistry journal article supplement (doi:10.1039/d3fo02202a), 2023-01-01
Supplement: d3fo02202a2.xlsx [file d3fo02202a2.xlsx]

## Sheet: Supplementary Table S1
		Table S1 Real-time PCR primers
		Gene name	Primer sequence(5´→3´)	Gene bank number
		STAT3	F：GCCACTCTGGTGTTTCAT	NM_012747.2
			R：GCTTGATTCTTCGCAGGT
		IGF-2	F：CTTGTTGACACGCTTCAGTTT	NM_031511.1
			R：GCAGCACTCTTCCACGATG
		H19	F：GCACTGTATGCCCTAACCG	NR_027324.1
			R：ACCCAACCTCCCTCCCTA
		Slc38a1	F：CGAACCAGGATGGAGACAAG	NM_138832.1
			R：GCAAGCCCAGTCGTAGATG
		Slc38a2	F：CCTTGGGCTTTCTTATGC	NM_181090.2
			R：GAGGAGGTGAACGGAGTA
		Slc38a4	F：GGTATCTTGGGCTTGTCC	NM_130748.1
			R：CCTTCCTTGGCTGTCTTC
		Slc7a1	F：TGTCCTGGTCTTGTGCTTC	NM_013111.2
			R：CCCTCCCTCACCGTATTTC
		Slc2a1	F：CCAGATACCTACCGGTTA	NM_138827.1
			R：TCCTTTAACTGCAGCTGA
		Slc2a3	F：CTGAAATGGAAAGGG TGT	NM_017102.2
			R：CCATGTCTTACACACAAGC
		FABP3	F：CTAGGGAGCTAGTTGACGGG	NM_011977
			R：GATGCCCCGTATCTCCAGAA
		FATP4	F：CTACCACTCTGCAGGGAACA	NM_010174
			R：CAGGTAGCGGCAGATTTCAC
		CD36	F：CTCCACCTCAACAGAAGATTCATG	NM_001159558.1
			R：GAGACTTGATTGGGCGTGAAA
		SLC27A1	F：CTAGAAGGCGCCTAGAAAGGTTAA	NM_011977.4
			R：GCTCAGAGGGTCTCCCAGCTGCCACT
		GAPDH	F：TGCTGGTGCTGAGTATGTGGTG	NM_008084.3
			R：TCTTCTGGGTGGCAGTGATGG

## Sheet: Supplementary Table S2
	circRNAs	Primers
	novel_circ_0000180_full_seq |chr 10:128276485-128278817|+	Primer pair 1
			Sequence (5'->3')	Template strand	Length	Start	Stop	Tm	GC%	Self complementarity	Self 3' complementarity
		Forward primer	ACCTATTGCTGCCCAAGCTG	Plus	20	1	20	60.68	55	4	2
		Reverse primer	CGCCATTTGGACTCACTGTTC	Minus	21	113	93	59.8	52.38	4	1
		Product length	113
		Primer pair 2										﻿
			Sequence (5'->3')	Template strand	Length	Start	Stop	Tm	GC%	Self complementarity	Self 3' complementarity
		Forward primer	GCAGCAGAAGTCCTGCATTG	Plus	20	38	57	59.83	55	7	3
		Reverse primer	CATTTGGACTCACTGTTCCAGC	Minus	22	110	89	59.77	50	5	2
		Product length	73
	novel_circ_0012284_full_seq |chr 5:21226243-21242882|+	Primer pair 1
			Sequence (5'->3')	Template strand	Length	Start	Stop	Tm	GC%	Self complementarity	Self 3' complementarity
		Forward primer	CCTAAGTCTGACTCACGGGAAG	Plus	22	46	67	59.84	54.55	7	2
		Reverse primer	CAGATCCCACTGAGCCCAAA	Minus	20	172	153	59.67	55	4	0
		Product length	127
		Primer pair 2
			Sequence (5'->3')	Template strand	Length	Start	Stop	Tm	GC%	Self complementarity	Self 3' complementarity
		Forward primer	CCTAAGTCTGACTCACGGGAA	Plus	21	46	66	58.83	52.38	7	2
		Reverse primer	ATCCCACTGAGCCCAAACAA	Minus	20	169	150	59.52	50	4	0
		Product length	124
	novel_circ_0010580_full_seq |chr 3:95784213-95787384|-	Primer pair 1
			Sequence (5'->3')	Template strand	Length	Start	Stop	Tm	GC%	Self complementarity	Self 3' complementarity
		Forward primer	ACTGAAGGAGAAACAGTTGTCA	Plus	22	30	51	57.51	40.91	5	3
		Reverse primer	ACGGATGGATCCCTTTTAAACAC	Minus	23	112	90	58.99	43.48	6	2
		Product length	83
		Primer pair 2
			Sequence (5'->3')	Template strand	Length	Start	Stop	Tm	GC%	Self complementarity	Self 3' complementarity
		Forward primer	ACTGAAGGAGAAACAGTTGTCA	Plus	22	30	51	57.51	40.91	5	3
		Reverse primer	GACGGATGGATCCCTTTTAAACAC	Minus	24	113	90	59.9	45.83	6	2
		Product length	84
	novel_circ_0004766_full_seq |chr 15:99623568-99624343|-	Primer pair 1
			Sequence (5'->3')	Template strand	Length	Start	Stop	Tm	GC%	Self complementarity	Self 3' complementarity
		Forward primer	GAGAACATAGACAGCCAGCGA	Plus	21	40	60	59.86	52.38	2	0
		Reverse primer	TCTGTTATCTCTTTAACGTCTGGTG	Minus	25	110	86	58.61	40	4	0
		Product length	71
		Primer pair 2
			Sequence (5'->3')	Template strand	Length	Start	Stop	Tm	GC%	Self complementarity	Self 3' complementarity
		Forward primer	AGAACATAGACAGCCAGCGAG	Plus	21	41	61	59.86	52.38	2	0
		Reverse primer	TCTGTTATCTCTTTAACGTCTGGTG	Minus	25	110	86	58.61	40	4	0
		Product length	70
	novel_circ_0003586_full_seq |chr 14:20300586-20309797|+	Primer pair 1
			Sequence (5'->3')	Template strand	Length	Start	Stop	Tm	GC%	Self complementarity	Self 3' complementarity
		Forward primer	AGTTCTGCAGCAAAAGTGGG	Plus	20	9	28	58.96	50	7	0
		Reverse primer	GACAGCAGCCTATAGCACCC	Minus	20	172	153	60.25	60	6	0
		Product length	164
		Primer pair 2
			Sequence (5'->3')	Template strand	Length	Start	Stop	Tm	GC%	Self complementarity	Self 3' complementarity
		Forward primer	GCAAGCGAGTGTGTCCCTC	Plus	19	57	75	61.03	63.16	3	3
		Reverse primer	GCCGTGCCTTAGTGACATAG	Minus	20	195	176	58.43	55	3	3
		Product length	139
	novel_circ_0000137_full_seq |chr 10:12475270-12486654|-	Primer pair 1
			Sequence (5'->3')	Template strand	Length	Start	Stop	Tm	GC%	Self complementarity	Self 3' complementarity
		Forward primer	TGGGCCATCTTCTCAACACT	Plus	20	11	30	58.93	50	5	1
		Reverse primer	CCTCAGGAGTCAACTTTGATGT	Minus	22	115	94	57.99	45.45	6	2
		Product length	105
		Primer pair 2
			Sequence (5'->3')	Template strand	Length	Start	Stop	Tm	GC%	Self complementarity	Self 3' complementarity
		Forward primer	TGGGCCATCTTCTCAACACTT	Plus	21	11	31	59.57	47.62	5	1
		Reverse primer	CCTCAGGAGTCAACTTTGATGT	Minus	22	115	94	57.99	45.45	6	2
		Product length	105
	novel_circ_0004486_full_seq |chr 15:73292034-73298245|-	Primer pair 1
			Sequence (5'->3')	Template strand	Length	Start	Stop	Tm	GC%	Self complementarity	Self 3' complementarity
		Forward primer	CGGACACATGCAGTCTCTGT	Plus	20	76	95	60.04	55	6	3
		Reverse primer	GAGTACTGGATGGTCTGCACT	Minus	21	147	127	59.17	52.38	6	1
		Product length	72
		Primer pair 2
			Sequence (5'->3')	Template strand	Length	Start	Stop	Tm	GC%	Self complementarity	Self 3' complementarity
		Forward primer	TGAAAAGCAAGGCATGCGGA	Plus	20	60	79	61.18	50	6	2
		Reverse primer	CTGGATGGTCTGCACTTGGTT	Minus	21	142	122	60.55	52.38	4	0
		Product length	83
	novel_circ_0000927_full_seq |chr 11:110313328-110314665|-	Primer pair 1
			Sequence (5'->3')	Template strand	Length	Start	Stop	Tm	GC%	Self complementarity	Self 3' complementarity
		Forward primer	GAAAGTTTCCCCAGGTCGCT	Plus	20	26	45	60.25	55	7	1
		Reverse primer	CAGGAAAGCCTGTGCAATCC	Minus	20	109	90	59.47	55	4	3
		Product length	84
		Primer pair 2
			Sequence (5'->3')	Template strand	Length	Start	Stop	Tm	GC%	Self complementarity	Self 3' complementarity
		Forward primer	TGGGATTGCACAGGCTTTCC	Plus	20	88	107	60.9	55	4	3
		Reverse primer	GCGATGACAGCCATAAGCAG	Minus	20	166	147	59.41	55	5	1
		Product length	79
	novel_circ_0003167_full_seq |chr 13:59473687-59477138|-	Primer pair 1
			Sequence (5'->3')	Template strand	Length	Start	Stop	Tm	GC%	Self complementarity	Self 3' complementarity
		Forward primer	GCGCCTACCTCTGAAATCACT	Plus	21	88	108	60.13	52.38	4	1
		Reverse primer	CGGTGAAGGTGATGGTGTAGT	Minus	21	174	154	59.72	52.38	2	1
		Product length	87
		Primer pair 2
			Sequence (5'->3')	Template strand	Length	Start	Stop	Tm	GC%	Self complementarity	Self 3' complementarity
		Forward primer	GCGCCTACCTCTGAAATCACT	Plus	21	88	108	60.13	52.38	4	1
		Reverse primer	ACGGTGAAGGTGATGGTGTA	Minus	20	175	156	58.66	50	3	2
		Product length	88
	mmu_circ_0001837_full_seq |chr 9:103140381-103163903|+	Primer pair 1
			Sequence (5'->3')	Template strand	Length	Start	Stop	Tm	GC%	Self complementarity	Self 3' complementarity
		Forward primer	TACAACGTGAAGCAGTCGGG	Plus	20	86	105	60.32	55	4	0
		Reverse primer	TTGCCTGGTAGGTGTTGTCG	Minus	20	163	144	60.25	55	3	2
		Product length	78
		Primer pair 2
			Sequence (5'->3')	Template strand	Length	Start	Stop	Tm	GC%	Self complementarity	Self 3' complementarity
		Forward primer	TACAACGTGAAGCAGTCGGG	Plus	20	86	105	60.32	55	4	0
		Reverse primer	GATGGTTGCCTGGTAGGTGT	Minus	20	168	149	59.67	55	3	0
		Product length	83
	ovel_circ_0011197_full_seq |chr 4:155515630-155535464|+	Primer pair 1
			Sequence (5'->3')	Template strand	Length	Start	Stop	Tm	GC%	Self complementarity	Self 3' complementarity
		Forward primer	GAGAACACTGAGGGGGCATC	Plus	20	41	60	60.11	60	3	1
		Reverse primer	GTTTCTGGTCTGGTTTCCCAC	Minus	21	135	115	59.05	52.38	3	0
		Product length	95
		Primer pair 2
			Sequence (5'->3')	Template strand	Length	Start	Stop	Tm	GC%	Self complementarity	Self 3' complementarity
		Forward primer	GAACACTGAGGGGGCATCTG	Plus	20	43	62	60.39	60	3	2
		Reverse primer	AGTGTTTCTGGTCTGGTTTCCC	Minus	22	138	117	60.42	50	2	0
		Product length	96
	novel_circ_0000802_full_seq |chr 11:103386957-103387348|-	Primer pair 1
			Sequence (5'->3')	Template strand	Length	Start	Stop	Tm	GC%	Self complementarity	Self 3' complementarity
		Forward primer	CTACGAGTCCGGGTGTTGTC	Plus	20	90	109	60.11	60	4	1
		Reverse primer	TCTGGCTCTTGGTTTGGTCC	Minus	20	169	150	59.89	55	3	3
		Product length	80
		Primer pair 2
			Sequence (5'->3')	Template strand	Length	Start	Stop	Tm	GC%	Self complementarity	Self 3' complementarity
		Forward primer	CTACGAGTCCGGGTGTTGTC	Plus	20	90	109	60.11	60	4	1
		Reverse primer	GTCTGGAACATGGGGGTGTC	Minus	20	187	168	60.32	60	4	1
		Product length	98
	mmu_circ_0001067_full_seq |chr 2:130549484-130549842|+	Primer pair 1
			Sequence (5'->3')	Template strand	Length	Start	Stop	Tm	GC%	Self complementarity	Self 3' complementarity
		Forward primer	ACTGTGCACTGCAGGAGAAG	Plus	20	87	106	60.25	55	7	2
		Reverse primer	TCAGCTCAACTGTGATGTCTCC	Minus	22	167	146	60.03	50	5	0
		Product length	81
		Primer pair 2
			Sequence (5'->3')	Template strand	Length	Start	Stop	Tm	GC%	Self complementarity	Self 3' complementarity
		Forward primer	ACTGTGCACTGCAGGAGAAG	Plus	20	87	106	60.25	55	7	2
		Reverse primer	CAGCTCAACTGTGATGTCTCCA	Minus	22	166	145	60.29	50	5	1
		Product length	80
	novel_circ_0016290_full_seq |chr 9:72307950-72312760|+	Primer pair 1
			Sequence (5'->3')	Template strand	Length	Start	Stop	Tm	GC%	Self complementarity	Self 3' complementarity
		Forward primer	TCACATGACGGGTTATGTAACAA	Plus	23	91	113	58.1	39.13	8	3
		Reverse primer	TCCTGGGTCAAGTCAAACAGT	Minus	21	171	151	59.16	47.62	3	3
		Product length	81
		Primer pair 2
			Sequence (5'->3')	Template strand	Length	Start	Stop	Tm	GC%	Self complementarity	Self 3' complementarity
		Forward primer	CCAAGAGCATGTCCCAAGTG	Plus	20	35	54	58.83	55	4	2
		Reverse primer	TGTTACATAACCCGTCATGTGATTT	Minus	25	112	88	59.06	36	8	3
		Product length	78
	novel_circ_0010301_full_seq |chr 3:55853770-55857068|-	Primer pair 1
			Sequence (5'->3')	Template strand	Length	Start	Stop	Tm	GC%	Self complementarity	Self 3' complementarity
		Forward primer	GCCAACCAGCTGAAACAGAAG	Plus	21	27	47	60	52.38	6	1
		Reverse primer	TGGCACAACAACCTGTGTGA	Minus	20	112	93	60.32	50	5	3
		Product length	86
		Primer pair 2
			Sequence (5'->3')	Template strand	Length	Start	Stop	Tm	GC%	Self complementarity	Self 3' complementarity
		Forward primer	AGCCAACCAGCTGAAACAGAA	Plus	21	26	46	60.41	47.62	6	0
		Reverse primer	TGGCACAACAACCTGTGTGA	Minus	20	112	93	60.32	50	5	3
		Product length	87
	novel_circ_0013651_full_seq |chr 6:87180109-87188831|-	Primer pair 1
			Sequence (5'->3')	Template strand	Length	Start	Stop	Tm	GC%	Self complementarity	Self 3' complementarity
		Forward primer	AACTCGATGCCTTGTGGGTT	Plus	20	24	43	59.89	50	4	1
		Reverse primer	ATCGTCTTCTTCCGTGTCTCC	Minus	21	112	92	59.53	52.38	2	0
		Product length	89
		Primer pair 2
			Sequence (5'->3')	Template strand	Length	Start	Stop	Tm	GC%	Self complementarity	Self 3' complementarity
		Forward primer	AAACTCGATGCCTTGTGGGT	Plus	20	23	42	59.89	50	4	0
		Reverse primer	ATCGTCTTCTTCCGTGTCTCC	Minus	21	112	92	59.53	52.38	2	0
		Product length	90
	novel_circ_0006211_full_seq |chr 18:34462060-34465220|-	Primer pair 1
			Sequence (5'->3')	Template strand	Length	Start	Stop	Tm	GC%	Self complementarity	Self 3' complementarity
		Forward primer	TTCAAGGAGAAGCAGCGTGT	Plus	20	26	45	59.89	50	3	3
		Reverse primer	TCACTATCCCCGTGGTCACT	Minus	20	147	128	59.96	55	4	2
		Product length	122
		Primer pair 2
			Sequence (5'->3')	Template strand	Length	Start	Stop	Tm	GC%	Self complementarity	Self 3' complementarity
		Forward primer	TCAAGGAGAAGCAGCGTGT	Plus	19	27	45	59.25	52.63	3	3
		Reverse primer	ATCCCCGTGGTCACTACAAG	Minus	20	142	123	59.1	55	5	3
		Product length	116
	mmu_circ_0001067_full_seq |chr 2:130549484-130549842|+	Primer pair 1
			Sequence (5'->3')	Template strand	Length	Start	Stop	Tm	GC%	Self complementarity	Self 3' complementarity
		Forward primer	GGAGCTCTGTGAGAACGATGA	Plus	21	17	37	59.53	52.38	6	1
		Reverse primer	TGGAGTCTCCCAACCACTTC	Minus	20	198	179	58.94	55	7	0
		Product length	182
		Primer pair 2
			Sequence (5'->3')	Template strand	Length	Start	Stop	Tm	GC%	Self complementarity	Self 3' complementarity
		Forward primer	CCAAGGAGCTCTGTGAGAACG	Plus	21	13	33	60.67	57.14	6	2
		Reverse primer	TCCCAACCACTTCATACCCAC	Minus	21	191	171	59.65	52.38	2	0
		Product length	179

## Sheet: Supplementary Table S3
			Supplementary Table S3. Detection results of total placental RNA quality
			Sample name	Concentration (ng/ul)	Volum (ul)	RIN	Quality grade
			CON-1	448	52	9.5	A
			CON-2	245	52	9.6	A
			CON-3	1240	52	9.5	A
			HFD-1	392	52	9.6	A
			HFD-2	255	52	9.5	A
			HFD-3	245	52	9.9	A

## Sheet: Supplementary Table S4
				Supplementary Table S4. Read quality and mapping results for RNA-seq
				Sample name	Raw reads	Clean reads	Error rate(%)	Q20(%)	Q30(%)
				CON-1	61159116	59937680	0.02	98.67	95.66
				CON-2	67434468	66002350	0.02	98.38	95.02
				CON-3	67196916	65616904	0.02	98.24	94.73
				HFD-1	65678182	64210538	0.02	98.45	95.18
				HFD-2	60695890	59661822	0.02	98.37	94.99
				HFD-3	60128548	58857580	0.02	98.32	94.92

## Sheet: Supplementary Table S5
			Supplementary Table S5. circRNA_description
CircRNA_ID	Chr	start	end	strand	full_length	spliced_length	gene_id	feature	samples	junction_read	non_junction_read	source_gene_name	Gene_description	CON_1.readcount	CON_2.readcount	CON_3.readcount	HFD_1.readcount	HFD_2.readcount	HFD_3.readcount	HSD_1.readcount	HSD_2.readcount	HSD_3.readcount	CON_1.tpm	CON_2.tpm	CON_3.tpm	HFD_1.tpm	HFD_2.tpm	HFD_3.tpm	HSD_1.tpm	HSD_2.tpm	HSD_3.tpm	HSD_readcount	CON_readcount	log2FoldChange	pval	padj	significant	HFD_readcount	CON_readcount	log2FoldChange	pval	padj	significant	HFD_readcount	HSD_readcount	log2FoldChange	pval	padj	significant
novel_circ_0009398	2	34429517	34444406	+	14889	256	ENSMUSG00000038696;	exon:34429518-34429626,exon:34444258-34444406	CON_1,CON_3,HFD_1,HFD_2,HSD_1,HSD_2	2,5,5,2,3,4	28,41,39,31,36,62	Mapkap1	Sin1, N-terminal||Sin1, middle CRIM domain||SAPK-interacting protein 1, Pleckstrin-homology domain||PH-like domain superfamily||-	2	0	5	5	2	0	3	4	0	39.2989	0	95.3053	70.3878	33.7024	0	55.9587	57.7434	0	2.0758	2.4239	-0.20299	0.91384	0.9996	FALSE	1.96963	2.49793	-0.31113	0.86795	0.99903	FALSE	2.04644	2.21821	-0.10711	0.95557	0.99761	FALSE
novel_circ_0009399	2	34432002	34435222	+	3220	416	ENSMUSG00000038696;	exon:34432003-34432330,exon:34435133-34435222	CON_1,CON_2,HFD_1,HFD_2,HFD_3,HSD_3	5,10,4,5,5,4	76,100,79,74,75,69	Mapkap1	Sin1, N-terminal||Sin1, middle CRIM domain||SAPK-interacting protein 1, Pleckstrin-homology domain||PH-like domain superfamily||-	5	10	0	4	5	5	0	0	4	98.2473	169.403	0	56.3103	84.2559	94.6934	0	0	79.4802	1.38589	4.86615	-1.8318	0.48983	0.98499	FALSE	4.39899	5.00086	-0.20373	0.84975	0.99903	FALSE	4.52954	1.47253	1.6645	0.28858	0.99144	FALSE
novel_circ_0009390	2	33825047	33834633	-	9586	218	ENSMUSG00000038740;	exon:33825048-33825170,exon:33834537-33834633	CON_1,HFD_2,HFD_3,HSD_2	3,2,4,3	5,18,16,32	Mvb12b	Multivesicular body subunit 12B||UMA domain||MABP domain||Multivesicular body subunit 12	3	0	0	0	2	4	0	3	0	58.9484	0	0	0	33.7024	75.7547	0	43.3075	0	0.800071	1.07332	-0.38567	0.91409	0.9996	FALSE	2.03026	1.10073	0.88683	0.73637	0.98865	FALSE	2.07902	0.844554	1.2402	0.65107	0.99144	FALSE
novel_circ_0009393	2	33834536	33874460	-	39924	325	ENSMUSG00000038740;	exon:33834537-33834633,exon:33840159-33840266,exon:33874338-33874460	CON_3	3	38	Mvb12b	Multivesicular body subunit 12B||UMA domain||MABP domain||Multivesicular body subunit 12	0	0	3	0	0	0	0	0	0	0	0	57.1832	0	0	0	0	0	0	0	1.02501	-2.5603	0.52141	0.98499	FALSE	0	1.05847	-2.6303	0.51006	0.98087	FALSE	0	0	NA	NA	NA	NA
novel_circ_0009396	2	34204779	34224646	-	19867	135	ENSMUSG00000038718;	exon:34204780-34204915	CON_2,HFD_1,HSD_3	2,8,3	4,4,4	Pbx3	Homeobox-like domain superfamily||Homeobox domain||Homeobox, conserved site||-||PBX	0	2	0	8	0	0	0	0	3	0	33.8805	0	112.621	0	0	0	0	59.6101	1.03942	0.615455	0.72403	0.84566	0.9996	FALSE	2.13643	0.633264	1.7426	0.5758	0.98087	FALSE	2.23033	1.1044	1.0327	0.78845	0.99761	FALSE
novel_circ_0009397	2	34419107	34444406	+	25299	237	ENSMUSG00000038696;	intron:34435133-34435222,intron:34444258-34444406	CON_3	3	39	Mapkap1	Sin1, N-terminal||Sin1, middle CRIM domain||SAPK-interacting protein 1, Pleckstrin-homology domain||PH-like domain superfamily||-	0	0	3	0	0	0	0	0	0	0	0	57.1832	0	0	0	0	0	0	0	1.02501	-2.5603	0.52141	0.98499	FALSE	0	1.05847	-2.6303	0.51006	0.98087	FALSE	0	0	NA	NA	NA	NA
novel_circ_0001544	11	74911042	74913133	-	2091	274	ENSMUSG00000001323;	exon:74911043-74911146,exon:74912962-74913133	CON_2,HFD_3,HSD_1	2,5,3	17,20,9	Srr	Serine/threonine dehydratase, pyridoxal-phosphate-binding site||Tryptophan synthase beta subunit-like PLP-dependent enzyme||Pyridoxal-phosphate dependent enzyme	0	2	0	0	0	5	3	0	0	0	33.8805	0	0	0	94.6934	55.9587	0	0	1.00904	0.615455	0.6856	0.85436	0.9996	FALSE	1.74487	0.633264	1.4264	0.66702	0.98087	FALSE	1.78318	1.09214	0.70913	0.81636	0.99761	FALSE
novel_circ_0013229	6	28242976	28256526	-	13550	95	ENSMUSG00000039841;	exon:28256431-28256526	CON_3,HFD_1,HSD_1	3,4,5	2,7,3	Zfp800	Zinc-finger C2H2-type 11||Zinc finger C2H2-type||Zinc finger C2H2 superfamily||Zinc finger protein 800	0	0	3	4	0	0	5	0	0	0	0	57.1832	56.3103	0	0	93.2644	0	0	1.68173	1.02501	0.71173	0.85396	0.9996	FALSE	1.06822	1.05847	0.038071	0.99107	0.99903	FALSE	1.11517	1.82024	-0.68613	0.8587	0.99761	FALSE
novel_circ_0013228	6	28242976	28247284	-	4308	143	ENSMUSG00000039841;	exon:28247141-28247284	HSD_1,HSD_3	5,3	6,4	Zfp800	Zinc-finger C2H2-type 11||Zinc finger C2H2-type||Zinc finger C2H2 superfamily||Zinc finger protein 800	0	0	0	0	0	0	5	0	3	0	0	0	0	0	0	93.2644	0	59.6101	2.72115	0	3.8729	0.20537	0.98499	FALSE	0	0	NA	NA	NA	NA	0	2.92463	-4.0472	0.17365	0.99144	FALSE
novel_circ_0001540	11	74682234	74699520	-	17286	101	ENSMUSG00000020745;	exon:74682235-74682336	CON_3,HFD_2,HSD_2,HSD_3	5,3,3,3	55,44,82,61	Pafah1b1	LIS1, N-terminal||WD40/YVTN repeat-like-containing domain superfamily||LIS1 homology motif||WD40 repeat, conserved site||Dynein regulator LIS1||G-protein beta WD-40 repeat||WD40 repeat||WD40-repeat-containing domain||WD40-repeat-containing domain superfamily	0	0	5	0	3	0	0	3	3	0	0	95.3053	0	50.5536	0	0	43.3075	59.6101	1.83949	1.70836	0.11318	0.96238	0.9996	FALSE	0.951542	1.76411	-0.89208	0.77467	0.99773	FALSE	0.978717	1.94895	-1.0019	0.71316	0.99614	FALSE
novel_circ_0001543	11	74784057	74787695	+	3638	339	ENSMUSG00000010554;	exon:74784058-74784257,exon:74787555-74787695	CON_1,CON_2,HFD_1,HFD_2,HFD_3,HSD_1,HSD_2,HSD_3	4,11,2,3,4,6,6,4	13,18,12,29,8,5,46,20	Mettl16	Methyltransferase METTL16/PsiM||S-adenosyl-L-methionine-dependent methyltransferase||METTL16/RlmF family||-	4	11	0	2	3	4	6	6	4	78.5978	186.343	0	28.1551	50.5536	75.7547	111.917	86.6151	79.4802	5.00411	4.8161	0.040632	0.96967	0.9996	FALSE	2.88155	4.95058	-0.80822	0.51595	0.98087	FALSE	2.96284	5.34592	-0.86901	0.41949	0.99144	FALSE
novel_circ_0004710	15	9175785	9186701	+	10916	389	ENSMUSG00000039704;	exon:9175786-9175919,exon:9177652-9177757,exon:9183910-9183956,exon:9186596-9186701	HFD_1	3	18	Lmbrd2	LMBR1-like membrane protein	0	0	0	3	0	0	0	0	0	0	0	0	42.2327	0	0	0	0	0	0	0	NA	NA	NA	NA	0.801163	0	2.0951	0.6011	0.98087	FALSE	0.836375	0	2.1951	0.58373	0.99144	FALSE
novel_circ_0013222	6	23107139	23122737	-	15598	335	ENSMUSG00000029695;	exon:23107140-23107251,exon:23122513-23122737	CON_2,CON_3,HFD_1,HFD_3,HSD_1	5,21,4,2,8	10,14,3,9,1	Aass	Alanine dehydrogenase/pyridine nucleotide transhydrogenase, NAD(H)-binding domain||NAD(P)-binding domain superfamily||Saccharopine dehydrogenase, NADP binding domain||Alanine dehydrogenase/pyridine nucleotide transhydrogenase, N-terminal||Saccharopine dehydrogenase, C-terminal	0	5	21	4	0	2	8	0	0	0	84.7013	400.282	56.3103	0	37.8774	149.223	0	0	2.69077	8.71373	-1.6999	0.58239	0.98499	FALSE	1.76617	8.99242	-2.3382	0.23584	0.98087	FALSE	1.82844	2.91238	-0.65955	0.8122	0.99761	FALSE
novel_circ_0013221	6	23016138	23025041	+	8903	176	ENSMUSG00000068748;	exon:23016139-23016230,exon:23022199-23022284	CON_2,HFD_2	2,3	1,5	Ptprz1	Fibronectin type III superfamily||Alpha carbonic anhydrase domain superfamily||Protein-tyrosine phosphatase-like||PTP type protein phosphatase||Immunoglobulin-like fold||Tyrosine specific protein phosphatases domain||Protein-tyrosine phosphatase, active site||Fibronectin type III||Receptor-type tyrosine-protein phosphatase, carbonic anhydrase domain||Protein-tyrosine phosphatase, catalytic||Alpha…	0	2	0	0	3	0	0	0	0	0	33.8805	0	0	50.5536	0	0	0	0	0	0.615455	-1.8435	0.6488	0.98499	FALSE	0.951542	0.633264	0.5652	0.87837	0.99903	FALSE	0.978717	0	2.4003	0.54776	0.99144	FALSE
novel_circ_0013220	6	22328554	22343319	-	14765	309	ENSMUSG00000029672;	exon:22328555-22328678,exon:22329579-22329608,exon:22339273-22339377,exon:22343266-22343319	HSD_1,HSD_3	4,2	19,37	Fam3c	FAM3 family||FAM3C (ILEI) domain||-||ILEI/PANDER domain||Protein FAM3C	0	0	0	0	0	0	4	0	2	0	0	0	0	0	0	74.6116	0	39.7401	2.03833	0	3.4561	0.31479	0.98499	FALSE	0	0	NA	NA	NA	NA	0	2.19245	-3.6317	0.28665	0.99144	FALSE
novel_circ_0001549	11	74981851	74990215	+	8364	280	ENSMUSG00000038290;	exon:74981852-74981913,exon:74987736-74987810,exon:74990070-74990215	CON_1,CON_2,HFD_1	4,7,4	13,24,19	Smg6	Tetratricopeptide-like helical domain superfamily||DNA/RNA-binding domain, Est1-type||-||PIN domain||Telomerase activating protein Est1||PIN-like domain superfamily	4	7	0	4	0	0	0	0	0	78.5978	118.582	0	56.3103	0	0	0	0	0	0	3.58519	-4.3703	0.20066	0.98499	FALSE	1.06822	3.68406	-1.7345	0.37811	0.98087	FALSE	1.11517	0	2.6058	0.51284	0.99144	FALSE
novel_circ_0013226	6	24624235	24637783	-	13548	220	ENSMUSG00000029684;	exon:24634572-24634658,exon:24637649-24637783	HFD_1	3	18	Wasl	CRIB domain superfamily||Neural Wiskott-Aldrich syndrome protein||PH-like domain superfamily||WH1/EVH1 domain||Wiscott-Aldrich syndrome protein, C-terminal||CRIB domain||WH2 domain||WASP family, EVH1 domain	0	0	0	3	0	0	0	0	0	0	0	0	42.2327	0	0	0	0	0	0	0	NA	NA	NA	NA	0.801163	0	2.0951	0.6011	0.98087	FALSE	0.836375	0	2.1951	0.58373	0.99144	FALSE
novel_circ_0013225	6	24624235	24634658	-	10423	195	ENSMUSG00000029684;	exon:24624236-24624389,exon:24625054-24625096	CON_1	3	12	Wasl	CRIB domain superfamily||Neural Wiskott-Aldrich syndrome protein||PH-like domain superfamily||WH1/EVH1 domain||Wiscott-Aldrich syndrome protein, C-terminal||CRIB domain||WH2 domain||WASP family, EVH1 domain	3	0	0	0	0	0	0	0	0	58.9484	0	0	0	0	0	0	0	0	0	1.07332	-2.6209	0.51123	0.98499	FALSE	0	1.10073	-2.6818	0.50149	0.98087	FALSE	0	0	NA	NA	NA	NA
novel_circ_0004718	15	93452116	93465245	+	13129	394	ENSMUSG00000036167;	exon:93452117-93452173,exon:93455451-93455530,exon:93459672-93459791,exon:93465105-93465245	CON_1,CON_2,CON_3,HFD_1,HFD_2,HFD_3,HSD_1,HSD_2,HSD_3	9,9,9,16,9,9,10,9,6	5,18,12,16,11,10,5,16,18	Pphln1	Periphilin-1	9	9	9	16	9	9	10	9	6	176.845	152.462	171.549	225.241	151.661	170.448	186.529	129.923	119.22	7.84251	9.06456	-0.20916	0.75918	0.99773	FALSE	10.2683	9.32726	0.1487	0.81193	0.99903	FALSE	10.6065	8.38293	0.35054	0.5896	0.99144	FALSE
novel_circ_0013327	6	3516621	3536972	+	20351	280	ENSMUSG00000001376;	exon:3532158-3532200,exon:3533472-3533570,exon:3536832-3536972	HFD_1,HFD_2	7,3	43,36	Vps50	Syndetin||Syndetin, C-terminal||Vacuolar protein sorting-associated protein 54, N-terminal	0	0	0	7	3	0	0	0	0	0	0	0	98.543	50.5536	0	0	0	0	0	0	NA	NA	NA	NA	2.82092	0	3.8974	0.19453	0.98087	FALSE	2.93026	0	3.9917	0.17749	0.99144	FALSE
mmu_circ_0000127	1	181956393	181961919	-	5526	344	ENSMUSG00000022995;	exon:181956394-181956571,exon:181961754-181961919	CON_1,CON_2,CON_3,HFD_1,HFD_2,HFD_3,HSD_1,HSD_2,HSD_3	22,38,32,35,40,42,33,47,14	37,68,46,44,81,52,40,109,80	Enah	VASP tetramerisation domain superfamily||VASP tetramerisation||WH1/EVH1 domain||-||PH-like domain superfamily	22	38	32	35	40	42	33	47	14	432.288	643.73	609.954	492.715	674.047	795.424	615.545	678.485	278.181	28.4845	30.4982	-0.090397	0.82389	0.9996	FALSE	36.6911	31.3943	0.21231	0.54823	0.98087	FALSE	37.786	30.3988	0.29583	0.44161	0.99144	FALSE
novel_circ_0013325	6	35078046	35080226	-	2180	396	ENSMUSG00000038784;	exon:35078047-35078178,exon:35079961-35080226	CON_1,CON_2,HFD_1,HSD_2,HSD_3	5,2,7,3,2	30,45,49,52,38	Cnot4	Nucleotide-binding alpha-beta plait domain superfamily||RNA recognition motif domain||Zinc finger, CCCH-type||NOT4, modified RING finger, HC subclass (C4C4-type)||RNA-binding domain superfamily||RNA recognition motif domain, eukaryote||Zinc finger, RING/FYVE/PHD-type||Zinc finger, RING-type||CCR4-NOT transcription complex subunit 4||CNOT4, RNA recognition motif	5	2	0	7	0	0	0	3	2	98.2473	33.8805	0	98.543	0	0	0	43.3075	39.7401	1.49302	2.40433	-0.66997	0.74536	0.99602	FALSE	1.86938	2.46781	-0.37814	0.88692	0.99903	FALSE	1.95154	1.58082	0.31554	0.89673	0.99761	FALSE
novel_circ_0013322	6	35064888	35080226	-	15338	265	ENSMUSG00000038784;	exon:35079961-35080226	CON_1,CON_2,CON_3,HFD_2,HFD_3,HSD_1,HSD_2	3,2,3,8,2,5,4	6,8,8,3,7,5,6	Cnot4	Nucleotide-binding alpha-beta plait domain superfamily||RNA recognition motif domain||Zinc finger, CCCH-type||NOT4, modified RING finger, HC subclass (C4C4-type)||RNA-binding domain superfamily||RNA recognition motif domain, eukaryote||Zinc finger, RING/FYVE/PHD-type||Zinc finger, RING-type||CCR4-NOT transcription complex subunit 4||CNOT4, RNA recognition motif	3	2	3	0	8	2	5	4	0	58.9484	33.8805	57.1832	0	134.809	37.8774	93.2644	57.7434	0	2.74849	2.71379	0.029527	0.98451	0.9996	FALSE	3.23539	2.79246	0.20492	0.88851	0.99903	FALSE	3.32318	2.94631	0.15971	0.91869	0.99761	FALSE
mmu_circ_0000120	1	178678825	178679359	+	534	534	ENSMUSG00000026494;	exon:178678826-178679359	CON_1,CON_2,HFD_3	9,6,11	1,2,0	Kif26b	Kinesin motor domain||P-loop containing nucleoside triphosphate hydrolase||Kinesin motor domain superfamily	9	6	0	0	0	11	0	0	0	176.845	101.642	0	0	0	208.325	0	0	0	0	5.06634	-4.8675	0.17188	0.98499	FALSE	3.83872	5.20197	-0.44442	0.88434	0.99903	FALSE	3.92299	0	4.4018	0.26252	0.99144	FALSE
novel_circ_0013320	6	34886065	34891537	-	5472	356	ENSMUSG00000058486;	exon:34886066-34886178,exon:34889237-34889331,exon:34891387-34891537	CON_1,CON_2,CON_3,HFD_1,HFD_2,HFD_3,HSD_1,HSD_2,HSD_3	8,5,13,11,13,7,5,8,7	7,29,18,16,22,17,9,19,15	Wdr91	WD40-repeat-containing domain superfamily||WD repeat-containing protein 91||WD40 repeat||-||WD40-repeat-containing domain||WD40/YVTN repeat-like-containing domain superfamily	8	5	13	11	13	7	5	8	7	157.196	84.7013	247.794	154.853	219.065	132.571	93.2644	115.487	139.09	6.24056	8.84256	-0.49587	0.51015	0.98499	FALSE	9.50377	9.10512	0.071658	0.91477	0.99903	FALSE	9.80426	6.6493	0.56151	0.42395	0.99144	FALSE
novel_circ_0003948	14	64887574	64903318	-	15744	164	ENSMUSG00000021972;	exon:64887575-64887660,exon:64903239-64903318	HFD_2,HFD_3,HSD_1	3,4,3	36,31,25	Hmbox1	Homeobox-containing protein 1||Lambda repressor-like, DNA-binding domain superfamily||Homeobox domain||Hepatocyte nuclear factor 1, N-terminal||Cro/C1-type helix-turn-helix domain||Homeobox-like domain superfamily	0	0	0	0	3	4	3	0	0	0	0	0	0	50.5536	75.7547	55.9587	0	0	1.00904	0	2.4402	0.54079	0.98499	FALSE	2.34744	0	3.6182	0.2659	0.98087	FALSE	2.40526	1.09214	1.1519	0.63919	0.99144	FALSE
novel_circ_0003947	14	64887574	64897126	-	9552	85	ENSMUSG00000021972;	exon:64887575-64887660	CON_2,CON_3	5,2	49,16	Hmbox1	Homeobox-containing protein 1||Lambda repressor-like, DNA-binding domain superfamily||Homeobox domain||Hepatocyte nuclear factor 1, N-terminal||Cro/C1-type helix-turn-helix domain||Homeobox-like domain superfamily	0	5	2	0	0	0	0	0	0	0	84.7013	38.1221	0	0	0	0	0	0	0	2.22198	-3.6836	0.26792	0.98499	FALSE	0	2.2888	-3.7505	0.25273	0.98087	FALSE	0	0	NA	NA	NA	NA
novel_circ_0003946	14	64851884	64887660	-	35776	348	ENSMUSG00000021972;	exon:64851885-64852038,exon:64861516-64861626,exon:64887575-64887660	CON_3,HFD_1,HFD_2,HFD_3,HSD_1,HSD_2,HSD_3	6,5,10,8,2,6,8	14,15,21,13,12,33,18	Hmbox1	Homeobox-containing protein 1||Lambda repressor-like, DNA-binding domain superfamily||Homeobox domain||Hepatocyte nuclear factor 1, N-terminal||Cro/C1-type helix-turn-helix domain||Homeobox-like domain superfamily	0	0	6	5	10	8	2	6	8	0	0	114.366	70.3878	168.512	151.509	37.3058	86.6151	158.96	5.04462	2.05003	1.3051	0.3681	0.98499	FALSE	7.29887	2.11693	1.7904	0.24946	0.98087	FALSE	7.50943	5.36226	0.4791	0.57063	0.99144	FALSE
novel_circ_0003945	14	64851884	64861626	-	9742	153	ENSMUSG00000021972;	exon:64851885-64852038	CON_2,CON_3,HFD_1,HFD_2,HSD_2,HSD_3	2,2,5,6,3,3	35,14,9,27,44,30	Hmbox1	Homeobox-containing protein 1||Lambda repressor-like, DNA-binding domain superfamily||Homeobox domain||Hepatocyte nuclear factor 1, N-terminal||Cro/C1-type helix-turn-helix domain||Homeobox-like domain superfamily	0	2	2	5	6	0	0	3	3	0	33.8805	38.1221	70.3878	101.107	0	0	43.3075	59.6101	1.83949	1.2988	0.49702	0.83369	0.9996	FALSE	3.23835	1.33891	1.2713	0.49082	0.98087	FALSE	3.35139	1.94895	0.78363	0.64142	0.99144	FALSE
mmu_circ_0000129	1	185386245	185397267	+	11022	601	ENSMUSG00000026615;	exon:185394363-185394473,exon:185396030-185396166,exon:185397060-185397267	CON_1,CON_2,CON_3,HFD_1,HFD_2,HFD_3,HSD_1,HSD_2,HSD_3	52,53,65,85,52,41,58,77,41	59,114,65,80,102,61,55,142,96	Eprs	Aminoacyl-tRNA synthetase, class I, conserved site||-||Rossmann-like alpha/beta/alpha sandwich fold||Glutamyl/glutaminyl-tRNA synthetase||Anticodon-binding domain superfamily||Proline-tRNA ligase, class IIa, archaeal-type||Aminoacyl-tRNA synthetase, class II||WHEP-TRS domain||Ribosomal protein L25/Gln-tRNA synthetase, N-terminal||Glutamyl/glutaminyl-tRNA synthetase, class Ib, catalytic domain||Ri…	52	53	65	85	52	41	58	77	41	1021.77	897.833	1238.97	1196.59	876.262	776.486	1081.87	1111.56	814.672	54.2486	57.1225	-0.067388	0.816	0.9996	FALSE	53.501	58.7942	-0.12518	0.66579	0.98087	FALSE	55.2838	57.885	-0.06255	0.83276	0.99761	FALSE
mmu_circ_0000128	1	182853956	182858610	+	4654	363	ENSMUSG00000038576;	exon:182853957-182854130,exon:182858422-182858610	HFD_1,HSD_3	4,2	2,9	Susd4	Sushi/SCR/CCP superfamily||Sushi/SCR/CCP domain	0	0	0	4	0	0	0	0	2	0	0	0	56.3103	0	0	0	0	39.7401	0.692946	0	1.8892	0.63904	0.98499	FALSE	1.06822	0	2.5053	0.52931	0.98087	FALSE	1.11517	0.736264	0.63417	0.86294	0.99761	FALSE
novel_circ_0013328	6	35186432	35192038	+	5606	315	ENSMUSG00000038759;	exon:35186433-35186604,exon:35188624-35188768	CON_3	3	91	Nup205	Nucleoporin Nup186/Nup192/Nup205	0	0	3	0	0	0	0	0	0	0	0	57.1832	0	0	0	0	0	0	0	1.02501	-2.5603	0.52141	0.98499	FALSE	0	1.05847	-2.6303	0.51006	0.98087	FALSE	0	0	NA	NA	NA	NA
novel_circ_0013329	6	35189854	35192038	+	2184	392	ENSMUSG00000038759;	exon:35189855-35190083,exon:35191874-35192038	CON_1,CON_2,CON_3,HFD_1,HFD_2,HSD_1,HSD_2	3,2,3,8,4,7,3	31,45,67,38,60,27,57	Nup205	Nucleoporin Nup186/Nup192/Nup205	3	2	3	8	4	0	7	3	0	58.9484	33.8805	57.1832	112.621	67.4047	0	130.57	43.3075	0	3.15449	2.71379	0.2196	0.88191	0.9996	FALSE	3.40516	2.79246	0.31463	0.82146	0.99903	FALSE	3.53529	3.39289	0.083417	0.95428	0.99761	FALSE
novel_circ_0016493	9	99088604	99094663	-	6059	300	ENSMUSG00000032462;	exon:99088605-99088682,exon:99094440-99094663	CON_2,HFD_1,HFD_3,HSD_1	6,3,5,5	20,15,7,8	Pik3cb	Phosphatidylinositol 3-kinase adaptor-binding (PI3K ABD) domain||Phosphatidylinositol 3-kinase, Vps34 type||Phosphatidylinositol 3-kinase Ras-binding (PI3K RBD) domain||C2 domain superfamily||Phosphatidylinositol 3-/4-kinase, catalytic domain superfamily||Phosphatidylinositol kinase||Phosphatidylinositol 3/4-kinase, conserved site||Phosphatidylinositol 3-/4-kinase, catalytic domain||Protein kinas…	0	6	0	3	0	5	5	0	0	0	101.642	0	42.2327	0	94.6934	93.2644	0	0	1.68173	1.84637	-0.14583	0.9696	0.9996	FALSE	2.54604	1.89979	0.40517	0.87677	0.99903	FALSE	2.61955	1.82024	0.53914	0.79586	0.99761	FALSE
novel_circ_0016492	9	99044744	99055520	-	10776	301	ENSMUSG00000032462;	exon:99044745-99044868,exon:99055342-99055520	HFD_1	4	27	Pik3cb	Phosphatidylinositol 3-kinase adaptor-binding (PI3K ABD) domain||Phosphatidylinositol 3-kinase, Vps34 type||Phosphatidylinositol 3-kinase Ras-binding (PI3K RBD) domain||C2 domain superfamily||Phosphatidylinositol 3-/4-kinase, catalytic domain superfamily||Phosphatidylinositol kinase||Phosphatidylinositol 3/4-kinase, conserved site||Phosphatidylinositol 3-/4-kinase, catalytic domain||Protein kinas…	0	0	0	4	0	0	0	0	0	0	0	0	56.3103	0	0	0	0	0	0	0	NA	NA	NA	NA	1.06822	0	2.5053	0.52931	0.98087	FALSE	1.11517	0	2.6058	0.51284	0.99144	FALSE
novel_circ_0016491	9	99044744	99046714	-	1970	290	ENSMUSG00000032462;	exon:99044745-99044868,exon:99046547-99046714	CON_1,CON_3,HFD_1,HFD_2	5,2,3,5	12,10,10,6	Pik3cb	Phosphatidylinositol 3-kinase adaptor-binding (PI3K ABD) domain||Phosphatidylinositol 3-kinase, Vps34 type||Phosphatidylinositol 3-kinase Ras-binding (PI3K RBD) domain||C2 domain superfamily||Phosphatidylinositol 3-/4-kinase, catalytic domain superfamily||Phosphatidylinositol kinase||Phosphatidylinositol 3/4-kinase, conserved site||Phosphatidylinositol 3-/4-kinase, catalytic domain||Protein kinas…	5	0	2	3	5	0	0	0	0	98.2473	0	38.1221	42.2327	84.2559	0	0	0	0	0	2.47222	-3.8281	0.23089	0.98499	FALSE	2.38707	2.54019	-0.067759	0.96934	0.99903	FALSE	2.46757	0	3.7396	0.24539	0.99144	FALSE
novel_circ_0016490	9	99040920	99042669	-	1749	373	ENSMUSG00000032462;	exon:99040921-99041053,exon:99041313-99041409,exon:99042524-99042669	CON_2,HFD_1,HFD_2,HSD_1,HSD_2	9,3,2,2,4	8,6,5,4,7	Pik3cb	Phosphatidylinositol 3-kinase adaptor-binding (PI3K ABD) domain||Phosphatidylinositol 3-kinase, Vps34 type||Phosphatidylinositol 3-kinase Ras-binding (PI3K RBD) domain||C2 domain superfamily||Phosphatidylinositol 3-/4-kinase, catalytic domain superfamily||Phosphatidylinositol kinase||Phosphatidylinositol 3/4-kinase, conserved site||Phosphatidylinositol 3-/4-kinase, catalytic domain||Protein kinas…	0	9	0	3	2	0	2	4	0	0	152.462	0	42.2327	33.7024	0	37.3058	57.7434	0	1.73945	2.76955	-0.66884	0.80413	0.9996	FALSE	1.43552	2.84969	-0.98413	0.64344	0.98087	FALSE	1.48885	1.85417	-0.31585	0.89007	0.99761	FALSE
novel_circ_0016497	9	99262545	99263809	+	1264	431	ENSMUSG00000056267;	exon:99262546-99262636,exon:99262788-99262949,exon:99263629-99263809	HFD_2	4	4	Cep70	Centrosomal protein of 70kDa||-||Tetratricopeptide repeat	0	0	0	0	4	0	0	0	0	0	0	0	0	67.4047	0	0	0	0	0	0	NA	NA	NA	NA	1.26872	0	2.7352	0.49101	0.98087	FALSE	1.30496	0	2.8159	0.47832	0.99144	FALSE
novel_circ_0014898	8	125736067	125745445	+	9378	305	ENSMUSG00000031851;	exon:125737323-125737419,exon:125745236-125745445	HFD_3,HSD_1	2,3	28,11	Ntpcr	Nucleoside-triphosphatase, THEP1 type||P-loop containing nucleoside triphosphate hydrolase||AAA+ ATPase domain	0	0	0	0	0	2	3	0	0	0	0	0	0	0	37.8774	55.9587	0	0	1.00904	0	2.4402	0.54079	0.98499	FALSE	0.697949	0	1.854	0.64509	0.98087	FALSE	0.713271	1.09214	-0.62575	0.86603	0.99761	FALSE
novel_circ_0007258	1	118305199	118309866	-	4667	93	ENSMUSG00000026374;	exon:118309773-118309866	HFD_1,HSD_1,HSD_2	3,2,2	57,30,88	Tsn	Translin||Translin family||Translin superfamily||Translin, C-terminal||Translin, N-terminal	0	0	0	3	0	0	2	2	0	0	0	0	42.2327	0	0	37.3058	28.8717	0	1.20607	0	2.7094	0.48325	0.98499	FALSE	0.801163	0	2.0951	0.6011	0.98087	FALSE	0.836375	1.29113	-0.60245	0.84895	0.99761	FALSE
novel_circ_0007257	1	118304690	118309866	-	5176	172	ENSMUSG00000026374;	exon:118304691-118304770,exon:118309773-118309866	CON_1,CON_2,CON_3,HFD_2,HSD_2	2,3,7,3,3	36,48,48,64,88	Tsn	Translin||Translin family||Translin superfamily||Translin, C-terminal||Translin, N-terminal	2	3	7	0	3	0	0	3	0	39.2989	50.8208	133.427	0	50.5536	0	0	43.3075	0	0.800071	4.03043	-2.2435	0.22117	0.98499	FALSE	0.951542	4.15347	-2.1383	0.22311	0.98087	FALSE	0.978717	0.844554	0.18118	0.96071	0.99761	FALSE
novel_circ_0007256	1	11265678	11266159	+	481	256	ENSMUSG00000048960;	exon:11265679-11265745,exon:11265969-11266159	CON_1,CON_2,HFD_1,HSD_1,HSD_2,HSD_3	3,2,5,4,6,2	6,16,6,9,25,18	Prex2	Guanine-nucleotide dissociation stimulator, CDC24, conserved site||PREX2, DEP domain 1||-||DEP domain||Pleckstrin homology domain||Winged helix-like DNA-binding domain superfamily||Dbl homology (DH) domain superfamily||Dbl homology (DH) domain||PDZ superfamily||PH-like domain superfamily||Winged helix DNA-binding domain superfamily||PDZ domain	3	2	0	5	0	0	4	6	2	58.9484	33.8805	0	70.3878	0	0	74.6116	86.6151	39.7401	3.63847	1.68878	1.119	0.47168	0.98499	FALSE	1.33527	1.73399	-0.34796	0.89534	0.99903	FALSE	1.39396	3.88156	-1.4279	0.39843	0.99144	FALSE
novel_circ_0016499	9	99480569	99487959	-	7390	207	ENSMUSG00000032468;	exon:99480570-99480777	HFD_3	2	14	Armc8	Armadillo-type fold containing protein ARMC8/Vid28||Armadillo||Armadillo-type fold||Armadillo-like helical	0	0	0	0	0	2	0	0	0	0	0	0	0	0	37.8774	0	0	0	0	0	NA	NA	NA	NA	0.697949	0	1.854	0.64509	0.98087	FALSE	0.713271	0	1.9267	0.63226	0.99144	FALSE
novel_circ_0007252	1	11181854	11208655	+	26801	143	ENSMUSG00000048960;	exon:11208512-11208655	CON_1,CON_2,HFD_2,HFD_3,HSD_1,HSD_2	2,2,2,2,2,2	9,22,20,10,6,30	Prex2	Guanine-nucleotide dissociation stimulator, CDC24, conserved site||PREX2, DEP domain 1||-||DEP domain||Pleckstrin homology domain||Winged helix-like DNA-binding domain superfamily||Dbl homology (DH) domain superfamily||Dbl homology (DH) domain||PDZ superfamily||PH-like domain superfamily||Winged helix DNA-binding domain superfamily||PDZ domain	2	2	0	0	2	2	2	2	0	39.2989	33.8805	0	0	33.7024	37.8774	37.3058	28.8717	0	1.20607	1.33101	-0.13523	0.95924	0.9996	FALSE	1.33231	1.36708	-0.054159	0.98332	0.99903	FALSE	1.36575	1.29113	0.060258	0.98167	0.99761	FALSE
novel_circ_0007250	1	11169852	11170791	+	939	429	ENSMUSG00000048960;	exon:11169853-11170075,exon:11170584-11170791	HFD_1	2	21	Prex2	Guanine-nucleotide dissociation stimulator, CDC24, conserved site||PREX2, DEP domain 1||-||DEP domain||Pleckstrin homology domain||Winged helix-like DNA-binding domain superfamily||Dbl homology (DH) domain superfamily||Dbl homology (DH) domain||PDZ superfamily||PH-like domain superfamily||Winged helix DNA-binding domain superfamily||PDZ domain	0	0	0	2	0	0	0	0	0	0	0	0	28.1551	0	0	0	0	0	0	0	NA	NA	NA	NA	0.534108	0	1.5189	0.70802	0.98087	FALSE	0.557583	0	1.6184	0.68858	0.99144	FALSE
novel_circ_0004201	15	20955048	20970172	-	15124	79	ENSMUSG00000115122;ENSMUSG00000040452;	intron:20970093-20970172	CON_1,HFD_1,HFD_2,HFD_3,HSD_2,HSD_3	18,6,9,11,22,3	0,0,1,0,0,0	--;Cdh12	-	18	0	0	6	9	11	0	22	3	353.69	0	0	84.4654	151.661	208.325	0	317.589	59.6101	6.9066	6.43995	0.10568	0.97482	0.9996	FALSE	8.29567	6.60435	0.33148	0.87516	0.99903	FALSE	8.53189	7.29779	0.20282	0.88219	0.99761	FALSE
novel_circ_0015940	9	48717282	48743561	-	26279	318	ENSMUSG00000066687;	exon:48717283-48717369,exon:48720425-48720560,exon:48743464-48743561	CON_1,CON_2,CON_3,HFD_1,HFD_2,HFD_3,HSD_1,HSD_2,HSD_3	6,13,14,8,9,14,5,15,17	16,29,21,23,28,40,16,44,43	Zbtb16	Zinc finger C2H2-type||Zinc finger C2H2 superfamily||SKP1/BTB/POZ domain superfamily||BTB/POZ domain	6	13	14	8	9	14	5	15	17	117.897	220.223	266.855	112.621	151.661	265.141	93.2644	216.538	337.791	11.5721	10.9305	0.076861	0.90373	0.9996	FALSE	9.8767	11.2572	-0.20978	0.73992	0.98995	FALSE	10.1594	12.3012	-0.29084	0.64909	0.99144	FALSE
novel_circ_0005233	16	62769606	62770812	-	1206	275	ENSMUSG00000050312;	exon:62769607-62769728,exon:62770658-62770812	HFD_1,HFD_2	2,4	4,2	Nsun3	RNA (C5-cytosine) methyltransferase||S-adenosyl-L-methionine-dependent methyltransferase||SAM-dependent methyltransferase RsmB/NOP2-type||-	0	0	0	2	4	0	0	0	0	0	0	0	28.1551	67.4047	0	0	0	0	0	0	NA	NA	NA	NA	1.80283	0	3.2467	0.35643	0.98087	FALSE	1.86254	0	3.3333	0.35543	0.99144	FALSE
novel_circ_0015943	9	49035592	49035960	+	368	256	ENSMUSG00000032267;	exon:49035593-49035771,exon:49035882-49035960	HSD_2,HSD_3	5,4	8,4	Usp28	UBA-like superfamily||Ubiquitin specific protease domain||Ubiquitin specific protease, conserved site||Peptidase C19, ubiquitin carboxyl-terminal hydrolase||Papain-like cysteine peptidase superfamily	0	0	0	0	0	0	0	5	4	0	0	0	0	0	0	0	72.1792	79.4802	2.71934	0	3.8809	0.20221	0.98499	FALSE	0	0	NA	NA	NA	NA	0	2.88012	-4.0358	0.17562	0.99144	FALSE
novel_circ_0015944	9	49543010	49569900	-	26890	131	ENSMUSG00000039542;	exon:49543011-49543142	HSD_3	2	147	Ncam1	Immunoglobulin-like fold||Immunoglobulin subtype||Fibronectin type III superfamily||Immunoglobulin-like domain||Neural cell adhesion||Immunoglobulin I-set||Fibronectin type III||Immunoglobulin-like domain superfamily||Neural cell adhesion molecule 1||-||Immunoglobulin V-set domain||Immunoglobulin subtype 2	0	0	0	0	0	0	0	0	2	0	0	0	0	0	0	0	0	39.7401	0.692946	0	1.8892	0.63904	0.98499	FALSE	0	0	NA	NA	NA	NA	0	0.736264	-2.0487	0.61104	0.99144	FALSE
novel_circ_0015945	9	50619754	50621190	+	1436	368	ENSMUSG00000000167;	exon:50619755-50619878,exon:50620945-50621190	CON_1,CON_2,CON_3,HFD_1,HFD_2,HFD_3,HSD_1,HSD_2,HSD_3	9,10,4,8,4,6,3,6,7	1,1,0,0,0,1,0,6,0	Pih1d2	PIH1, N-terminal||PIH1D1/2/3, CS-like domain||-	9	10	4	8	4	6	3	6	7	176.845	169.403	76.2442	112.621	67.4047	113.632	55.9587	86.6151	139.09	5.03449	7.66393	-0.61157	0.46252	0.98499	FALSE	5.499	7.87978	-0.51826	0.51063	0.98087	FALSE	5.6751	5.35817	0.088088	0.9211	0.99761	FALSE
novel_circ_0015946	9	50701919	50710972	-	9053	361	ENSMUSG00000032064;	exon:50701920-50702027,exon:50706125-50706250,exon:50710843-50710972	CON_1	3	4	Dixdc1	DIX domain superfamily||DIX domain||Ubiquitin-like domain superfamily||CH domain superfamily||Calponin homology domain||Dishevelled-related protein	3	0	0	0	0	0	0	0	0	58.9484	0	0	0	0	0	0	0	0	0	1.07332	-2.6209	0.51123	0.98499	FALSE	0	1.10073	-2.6818	0.50149	0.98087	FALSE	0	0	NA	NA	NA	NA
novel_circ_0015947	9	50776543	50792407	+	15864	327	ENSMUSG00000032059;	exon:50776544-50776679,exon:50792063-50792150,exon:50792302-50792407	CON_3,HFD_1	6,4	27,20	Alg9	-||Alpha-1,2-mannosyltransferase ALG9-like||GPI mannosyltransferase	0	0	6	4	0	0	0	0	0	0	0	114.366	56.3103	0	0	0	0	0	0	2.05003	-3.5613	0.34896	0.98499	FALSE	1.06822	2.11693	-0.96909	0.80121	0.99903	FALSE	1.11517	0	2.6058	0.51284	0.99144	FALSE
novel_circ_0005325	16	93801560	93806471	+	4911	325	ENSMUSG00000022946;	exon:93801561-93801622,exon:93803462-93803590,exon:93806335-93806471	CON_1,CON_2,CON_3,HFD_2,HFD_3,HSD_1,HSD_2,HSD_3	10,2,5,3,6,6,5,10	5,18,2,11,26,9,13,10	Dop1b	Dopey, N-terminal||-||Protein dopey	10	2	5	0	3	6	6	5	10	196.495	33.8805	95.3053	0	50.5536	113.632	111.917	72.1792	198.7	6.81626	5.90156	0.21007	0.80955	0.9996	FALSE	3.04539	6.06646	-1.0248	0.37439	0.98087	FALSE	3.11853	7.27319	-1.2547	0.23447	0.99144	FALSE
novel_circ_0005230	16	59536697	59550549	-	13852	409	ENSMUSG00000022723;	exon:59536698-59536824,exon:59544029-59544165,exon:59550402-59550549	CON_3,HFD_1	3,2	14,18	Crybg3	Beta/gamma crystallin||Ricin B, lectin domain||Gamma-crystallin-like||Ricin B-like lectins	0	0	3	2	0	0	0	0	0	0	0	57.1832	28.1551	0	0	0	0	0	0	1.02501	-2.5603	0.52141	0.98499	FALSE	0.534108	1.05847	-0.94938	0.79705	0.99903	FALSE	0.557583	0	1.6184	0.68858	0.99144	FALSE
novel_circ_0000351	10	43157907	43160844	-	2937	323	ENSMUSG00000038248;	exon:43157908-43158093,exon:43160706-43160844	HFD_1,HFD_2,HSD_1,HSD_2,HSD_3	4,2,2,4,5	2,4,6,8,4	Sobp	Retinoic acid-induced protein 2/sine oculis-binding protein homologue	0	0	0	4	2	0	2	4	5	0	0	0	56.3103	33.7024	0	37.3058	57.7434	99.3502	3.47182	0	4.2296	0.079135	0.98499	FALSE	1.70258	0	3.1692	0.3741	0.98087	FALSE	1.76764	3.69483	-1.0292	0.49797	0.99144	FALSE
novel_circ_0002516	12	76072127	76075908	+	3781	321	ENSMUSG00000063450;	exon:76072128-76072283,exon:76075742-76075908	CON_3,HFD_2,HSD_2	7,2,4	12,26,44	Syne2	Spectrin repeat||KASH domain||Actinin-type actin-binding domain, conserved site||Nesprin-2||CH domain superfamily||-||Calponin homology domain||Spectrin/alpha-actinin	0	0	7	0	2	0	0	4	0	0	0	133.427	0	33.7024	0	0	57.7434	0	1.06676	2.3917	-1.1454	0.76573	0.99841	FALSE	0.634361	2.46976	-1.9636	0.61437	0.98087	FALSE	0.652478	1.12607	-0.8134	0.82662	0.99761	FALSE
novel_circ_0005235	16	62827163	62830809	-	3646	315	ENSMUSG00000022911;	exon:62827164-62827413,exon:62830743-62830809	CON_3,HFD_2	3,4	32,15	Arl13b	Small GTP-binding protein domain||P-loop containing nucleoside triphosphate hydrolase||Small GTPase superfamily, ARF/SAR type	0	0	3	0	4	0	0	0	0	0	0	57.1832	0	67.4047	0	0	0	0	0	1.02501	-2.5603	0.52141	0.98499	FALSE	1.26872	1.05847	0.2624	0.93682	0.99903	FALSE	1.30496	0	2.8159	0.47832	0.99144	FALSE
novel_circ_0005488	17	26736788	26743131	+	6343	194	ENSMUSG00000048249;	exon:26736789-26736983	CON_1,CON_2,CON_3,HFD_1,HFD_2,HFD_3,HSD_1,HSD_2,HSD_3	60,59,54,105,83,93,74,77,81	60,62,34,59,40,61,47,73,59	Crebrf	Basic-leucine zipper domain||CREB3 regulatory factor	60	59	54	105	83	93	74	77	81	1178.97	999.475	1029.3	1478.14	1398.65	1761.3	1380.31	1111.56	1609.47	73.4891	58.0727	0.33626	0.20756	0.98499	FALSE	86.8213	59.7482	0.53889	0.029721	0.98087	TRUE	89.5181	78.4351	0.19538	0.4229	0.99144	FALSE
novel_circ_0005234	16	62811848	62830813	-	18965	272	ENSMUSG00000022911;	exon:62811849-62812051,exon:62830743-62830813	CON_1,CON_2,CON_3,HFD_2,HFD_3,HSD_1,HSD_2,HSD_3	5,2,5,4,2,4,6,6	15,30,21,24,11,9,10,18	Arl13b	Small GTP-binding protein domain||P-loop containing nucleoside triphosphate hydrolase||Small GTPase superfamily, ARF/SAR type	5	2	5	0	4	2	4	6	6	98.2473	33.8805	95.3053	0	67.4047	37.8774	74.6116	86.6151	119.22	5.02436	4.11268	0.29778	0.76698	0.99841	FALSE	1.96667	4.23192	-1.1254	0.42547	0.98087	FALSE	2.01823	5.35409	-1.4349	0.25814	0.99144	FALSE
novel_circ_0005044	16	33196073	33210102	+	14029	243	ENSMUSG00000022807;	exon:33196074-33196142,exon:33204672-33204847	HFD_3,HSD_2	2,4	20,37	Osbpl11	Oxysterol-binding protein, conserved site||Oxysterol-binding protein||Oxysterol-binding protein superfamily||Pleckstrin homology domain||PH-like domain superfamily	0	0	0	0	0	2	0	4	0	0	0	0	0	0	37.8774	0	57.7434	0	1.06676	0	2.5468	0.52266	0.98499	FALSE	0.697949	0	1.854	0.64509	0.98087	FALSE	0.713271	1.12607	-0.70353	0.84834	0.99761	FALSE
novel_circ_0005045	16	33196073	33216859	+	20786	213	ENSMUSG00000022807;	exon:33196074-33196142,exon:33216714-33216859	HFD_2	6	34	Osbpl11	Oxysterol-binding protein, conserved site||Oxysterol-binding protein||Oxysterol-binding protein superfamily||Pleckstrin homology domain||PH-like domain superfamily	0	0	0	0	6	0	0	0	0	0	0	0	0	101.107	0	0	0	0	0	0	NA	NA	NA	NA	1.90308	0	3.3208	0.38921	0.98087	FALSE	1.95743	0	3.4015	0.38849	0.99144	FALSE
novel_circ_0002018	12	109686949	109698715	+	11766	186	n/a	intergenic_region:109686950-109687063,intergenic_region:109687668-109687741	CON_1,HFD_2,HSD_2	3,6,6	2,4,10	--	-	3	0	0	0	6	0	0	6	0	58.9484	0	0	0	101.107	0	0	86.6151	0	1.60014	1.07332	0.60799	0.84564	0.9996	FALSE	1.90308	1.10073	0.79627	0.83642	0.99903	FALSE	1.95743	1.68911	0.19796	0.95872	0.99761	FALSE
novel_circ_0005047	16	33204671	33210102	+	5431	254	ENSMUSG00000022807;	exon:33204672-33204847,exon:33205923-33206002	HFD_2,HSD_2	5,2	47,46	Osbpl11	Oxysterol-binding protein, conserved site||Oxysterol-binding protein||Oxysterol-binding protein superfamily||Pleckstrin homology domain||PH-like domain superfamily	0	0	0	0	5	0	0	2	0	0	0	0	0	84.2559	0	0	28.8717	0	0.53338	0	1.5621	0.70028	0.98499	FALSE	1.5859	0	3.0576	0.4399	0.98087	FALSE	1.63119	0.563036	1.4874	0.66857	0.99144	FALSE
novel_circ_0000355	10	43928322	43932546	+	4224	319	ENSMUSG00000019864;	exon:43928323-43928459,exon:43932363-43932546	HFD_3	4	7	Rtn4ip1	Polyketide synthase, enoylreductase domain||Reticulon-4-interacting protein 1||Quinone oxidoreductase/zeta-crystallin, conserved site||Alcohol dehydrogenase, N-terminal||NAD(P)-binding domain superfamily||GroES-like superfamily	0	0	0	0	0	4	0	0	0	0	0	0	0	0	75.7547	0	0	0	0	0	NA	NA	NA	NA	1.3959	0	2.864	0.47022	0.98087	FALSE	1.42654	0	2.9359	0.4592	0.99144	FALSE
novel_circ_0005042	16	33083018	33091362	+	8344	394	ENSMUSG00000022802;	exon:33083019-33083113,exon:33088102-33088219,exon:33089265-33089372,exon:33091286-33091362	HSD_2	4	8	Lmln	Peptidase M8, leishmanolysin	0	0	0	0	0	0	0	4	0	0	0	0	0	0	0	0	57.7434	0	1.06676	0	2.5468	0.52266	0.98499	FALSE	0	0	NA	NA	NA	NA	0	1.12607	-2.6973	0.49846	0.99144	FALSE
novel_circ_0003357	13	94229713	94233180	-	3467	334	ENSMUSG00000021687;	exon:94229714-94229842,exon:94232072-94232180,exon:94233082-94233180	HFD_3,HSD_2	2,7	45,76	Scamp1	SCAMP	0	0	0	0	0	2	0	7	0	0	0	0	0	0	37.8774	0	101.051	0	1.86683	0	3.3469	0.39241	0.98499	FALSE	0.697949	0	1.854	0.64509	0.98087	FALSE	0.713271	1.97062	-1.5135	0.63264	0.99144	FALSE
novel_circ_0002012	12	109620312	109627153	+	6841	266	ENSMUSG00000097451;	exon:109620313-109620400,exon:109625101-109625175,exon:109627048-109627153	CON_1,CON_2,CON_3,HFD_1,HFD_2,HFD_3,HSD_1,HSD_2,HSD_3	30,17,15,13,12,20,12,12,15	52,147,85,72,130,51,59,110,86	--	-	30	17	15	13	12	20	12	12	15	589.484	287.984	285.916	183.008	202.214	378.774	223.835	173.23	298.051	12.4335	21.0897	-0.76638	0.13692	0.98499	FALSE	14.2574	21.6823	-0.61351	0.22431	0.98087	FALSE	14.6719	13.2688	0.14314	0.79386	0.99761	FALSE
novel_circ_0002010	12	108980690	108992937	+	12247	374	ENSMUSG00000040877;	exon:108980691-108980838,exon:108988261-108988358,exon:108992807-108992937	CON_1	3	4	Wdr25	WD40-repeat-containing domain||WD40 repeat||-||WD40/YVTN repeat-like-containing domain superfamily||WD40-repeat-containing domain superfamily	3	0	0	0	0	0	0	0	0	58.9484	0	0	0	0	0	0	0	0	0	1.07332	-2.6209	0.51123	0.98499	FALSE	0	1.10073	-2.6818	0.50149	0.98087	FALSE	0	0	NA	NA	NA	NA
novel_circ_0005959	17	80649526	80664082	-	14556	268	ENSMUSG00000024242;	exon:80649527-80649599,exon:80651085-80651127,exon:80655857-80655921,exon:80663992-80664082	CON_1,HFD_2,HFD_3	4,2,4	14,39,43	Map4k3	Citron homology (CNH) domain||Protein kinase-like domain superfamily||Mitogen-activated protein (MAP) kinase kinase kinase kinase||Protein kinase domain||Protein kinase, ATP binding site	4	0	0	0	2	4	0	0	0	78.5978	0	0	0	33.7024	75.7547	0	0	0	0	1.4311	-3.0378	0.44404	0.98499	FALSE	2.03026	1.46763	0.46816	0.84812	0.99903	FALSE	2.07902	0	3.4827	0.31693	0.99144	FALSE
novel_circ_0005048	16	33204671	33216859	+	12188	320	ENSMUSG00000022807;	exon:33204672-33204847,exon:33216714-33216859	HFD_3	2	38	Osbpl11	Oxysterol-binding protein, conserved site||Oxysterol-binding protein||Oxysterol-binding protein superfamily||Pleckstrin homology domain||PH-like domain superfamily	0	0	0	0	0	2	0	0	0	0	0	0	0	0	37.8774	0	0	0	0	0	NA	NA	NA	NA	0.697949	0	1.854	0.64509	0.98087	FALSE	0.713271	0	1.9267	0.63226	0.99144	FALSE
novel_circ_0003354	13	94208135	94233180	-	25045	206	ENSMUSG00000021687;	exon:94232072-94232180,exon:94233082-94233180	CON_3,HFD_1	4,5	46,51	Scamp1	SCAMP	0	0	4	5	0	0	0	0	0	0	0	76.2442	70.3878	0	0	0	0	0	0	1.36668	-2.9759	0.4537	0.98499	FALSE	1.33527	1.41129	-0.056015	0.98552	0.99903	FALSE	1.39396	0	2.925	0.46093	0.99144	FALSE
novel_circ_0009974	3	117829576	117833039	-	3463	86	ENSMUSG00000028007;	exon:117829577-117829663	HSD_3	2	77	Snx7	Phox homologous domain||PX domain superfamily||AH/BAR domain superfamily||Sorting nexin-7	0	0	0	0	0	0	0	0	2	0	0	0	0	0	0	0	0	39.7401	0.692946	0	1.8892	0.63904	0.98499	FALSE	0	0	NA	NA	NA	NA	0	0.736264	-2.0487	0.61104	0.99144	FALSE
novel_circ_0009975	3	117829576	117840038	-	10462	210	ENSMUSG00000028007;	exon:117829577-117829663,exon:117839914-117840038	CON_1,CON_2,CON_3,HFD_1,HFD_2,HFD_3,HSD_1,HSD_2,HSD_3	5,5,9,9,5,9,4,8,10	47,88,51,72,66,57,48,86,81	Snx7	Phox homologous domain||PX domain superfamily||AH/BAR domain superfamily||Sorting nexin-7	5	5	9	9	5	9	4	8	10	98.2473	84.7013	171.549	126.698	84.2559	170.448	74.6116	115.487	198.7	6.94364	6.40255	0.11567	0.88562	0.9996	FALSE	7.13016	6.5931	0.11251	0.88424	0.99903	FALSE	7.35004	7.38965	-0.0072017	0.99243	0.99761	FALSE
novel_circ_0009976	3	117829576	117846696	-	17120	268	ENSMUSG00000028007;	exon:117829577-117829663,exon:117846514-117846696	CON_1,CON_3,HFD_1,HFD_3,HSD_1,HSD_2	9,2,9,3,8,5	45,59,95,65,55,101	Snx7	Phox homologous domain||PX domain superfamily||AH/BAR domain superfamily||Sorting nexin-7	9	0	2	9	0	3	8	5	0	176.845	0	38.1221	126.698	0	56.816	149.223	72.1792	0	4.02422	3.90331	0.053036	0.97835	0.9996	FALSE	3.45041	4.00782	-0.2	0.91898	0.99903	FALSE	3.57903	4.31997	-0.26242	0.8852	0.99761	FALSE
novel_circ_0003355	13	94224894	94233180	-	8286	365	ENSMUSG00000021687;	exon:94224895-94225054,exon:94232072-94232180,exon:94233082-94233180	CON_1,CON_2,CON_3,HFD_1,HFD_2,HFD_3,HSD_1,HSD_2,HSD_3	11,10,7,15,13,20,12,12,8	19,33,40,53,40,38,21,61,27	Scamp1	SCAMP	11	10	7	15	13	20	12	12	8	216.144	169.403	133.427	211.164	219.065	378.774	223.835	173.23	158.96	10.0082	9.4045	0.091486	0.88588	0.9996	FALSE	15.1087	9.67207	0.63582	0.26904	0.98087	FALSE	15.5557	10.6918	0.53389	0.33962	0.99144	FALSE
novel_circ_0009970	3	116778618	116779380	-	762	236	ENSMUSG00000033400;	exon:116779055-116779167,exon:116779256-116779380	CON_2,HFD_1	2,2	41,32	Agl	Glycogen debranching enzyme||Glycogen debranching enzyme, glucanotransferase domain||Glycoside hydrolase superfamily||Eukaryotic glycogen debranching enzyme, N-terminal domain||Glycogen debranching enzyme, central domain||Six-hairpin glycosidase superfamily||Glycogen debranching enzyme, C-terminal||-||Glycogen debranching enzyme, metazoa	0	2	0	2	0	0	0	0	0	0	33.8805	0	28.1551	0	0	0	0	0	0	0.615455	-1.8435	0.6488	0.98499	FALSE	0.534108	0.633264	-0.23166	0.95232	0.99903	FALSE	0.557583	0	1.6184	0.68858	0.99144	FALSE
novel_circ_0009971	3	116778618	116782643	-	4025	369	ENSMUSG00000033400;	exon:116778619-116778753,exon:116779055-116779167,exon:116782520-116782643	CON_2,CON_3,HFD_2,HSD_1,HSD_3	3,4,3,8,7	45,21,40,8,31	Agl	Glycogen debranching enzyme||Glycogen debranching enzyme, glucanotransferase domain||Glycoside hydrolase superfamily||Eukaryotic glycogen debranching enzyme, N-terminal domain||Glycogen debranching enzyme, central domain||Six-hairpin glycosidase superfamily||Glycogen debranching enzyme, C-terminal||-||Glycogen debranching enzyme, metazoa	0	3	4	0	3	0	8	0	7	0	50.8208	76.2442	0	50.5536	0	149.223	0	139.09	5.11608	2.28987	1.1436	0.51639	0.98499	FALSE	0.951542	2.36118	-1.3206	0.60037	0.98087	FALSE	0.978717	5.4893	-2.4879	0.33034	0.99144	FALSE
novel_circ_0009972	3	116791005	116793822	-	2817	210	ENSMUSG00000033400;	exon:116793612-116793822	HFD_1,HFD_3,HSD_1,HSD_2	8,2,3,2	13,14,17,30	Agl	Glycogen debranching enzyme||Glycogen debranching enzyme, glucanotransferase domain||Glycoside hydrolase superfamily||Eukaryotic glycogen debranching enzyme, N-terminal domain||Glycogen debranching enzyme, central domain||Six-hairpin glycosidase superfamily||Glycogen debranching enzyme, C-terminal||-||Glycogen debranching enzyme, metazoa	0	0	0	8	0	2	3	2	0	0	0	0	112.621	0	37.8774	55.9587	28.8717	0	1.54242	0	3.0617	0.40912	0.98499	FALSE	2.83438	0	3.9033	0.19547	0.98087	FALSE	2.9436	1.65518	0.84287	0.65207	0.99144	FALSE
novel_circ_0009973	3	116881757	116891987	+	10230	241	ENSMUSG00000033386;	exon:116881758-116881852,exon:116891840-116891987	HFD_1	4	20	Frrs1	DOMON domain||Cytochrome b561/ferric reductase transmembrane||-||Reeler domain	0	0	0	4	0	0	0	0	0	0	0	0	56.3103	0	0	0	0	0	0	0	NA	NA	NA	NA	1.06822	0	2.5053	0.52931	0.98087	FALSE	1.11517	0	2.6058	0.51284	0.99144	FALSE
novel_circ_0006258	18	36581067	36583759	+	2692	294	ENSMUSG00000024483;	exon:36581068-36581215,exon:36583612-36583759	CON_1,CON_2,CON_3,HFD_1,HFD_2,HFD_3,HSD_1,HSD_2,HSD_3	3,11,3,5,5,6,5,12,8	56,46,42,67,66,60,58,71,50	Ankhd1	-||K Homology domain||K Homology domain, type 1 superfamily||Ankyrin repeat||K Homology domain, type 1||Ankyrin repeat-containing domain||Ankyrin repeat-containing domain superfamily	3	11	3	5	5	6	5	12	8	58.9484	186.343	57.1832	70.3878	84.2559	113.632	93.2644	173.23	158.96	7.6538	5.48334	0.47042	0.57241	0.98499	FALSE	5.01502	5.64214	-0.19406	0.83254	0.99903	FALSE	5.16497	8.14351	-0.67485	0.39575	0.99144	FALSE
novel_circ_0009979	3	119740314	119747954	-	7640	421	ENSMUSG00000028134;	exon:119740315-119740510,exon:119744881-119744943,exon:119747790-119747954	HFD_2	3	20	Ptbp2	PTBP1, RNA recognition motif 2-like||-||Nucleotide-binding alpha-beta plait domain superfamily||HnRNP-L/PTB||RNA recognition motif domain||PTBP2, RNA recognition motif 4||RNA-binding domain superfamily||PTBP2, RNA recognition motif 3||Polypyrimidine tract-binding protein1/2/3, RNA recognition motif 2||PTBP2, RNA recognition motif 1	0	0	0	0	3	0	0	0	0	0	0	0	0	50.5536	0	0	0	0	0	0	NA	NA	NA	NA	0.951542	0	2.3196	0.5613	0.98087	FALSE	0.978717	0	2.4003	0.54776	0.99144	FALSE
novel_circ_0003353	13	93862086	93880558	+	18472	313	ENSMUSG00000042082;	exon:93862087-93862330,exon:93880488-93880558	CON_1,CON_2,CON_3,HFD_1,HFD_2,HFD_3,HSD_1,HSD_2,HSD_3	5,6,4,10,10,4,7,13,2	10,29,14,9,20,15,8,16,15	Arsb	Sulfatase, conserved site||Alkaline-phosphatase-like, core domain superfamily||Sulfatase, N-terminal	5	6	4	10	10	4	7	13	2	98.2473	101.642	76.2442	140.776	168.512	75.7547	130.57	187.666	39.7401	6.51434	5.00192	0.3994	0.65515	0.98499	FALSE	7.23825	5.14562	0.49881	0.54185	0.98087	FALSE	7.47685	6.94433	0.091832	0.90846	0.99761	FALSE
novel_circ_0003350	13	93472620	93473726	-	1106	350	ENSMUSG00000021690;	intron:93472621-93472794,intron:93473549-93473726	HSD_1,HSD_2	2,2	6,22	Jmy	WH2 domain||JMY/WHAMM, N-terminal||JMY/WHAMM, middle domain||Junction-mediating and -regulatory protein	0	0	0	0	0	0	2	2	0	0	0	0	0	0	0	37.3058	28.8717	0	1.20607	0	2.7094	0.48325	0.98499	FALSE	0	0	NA	NA	NA	NA	0	1.29113	-2.8782	0.46019	0.99144	FALSE
novel_circ_0000704	10	89779834	89782740	+	2906	170	ENSMUSG00000019951;	exon:89782570-89782740	CON_1,HFD_1,HSD_1	2,6,4	25,53,36	Uhrf1bp1l	UHRF1-binding protein 1-like||-||Vacuolar protein sorting-associated protein 13, N-terminal domain	2	0	0	6	0	0	4	0	0	39.2989	0	0	84.4654	0	0	74.6116	0	0	1.34538	0.71555	0.91797	0.79235	0.9996	FALSE	1.60233	0.733817	1.1576	0.72733	0.98721	FALSE	1.67275	1.45619	0.21752	0.95484	0.99761	FALSE
novel_circ_0000705	10	89779834	89791481	+	11647	307	ENSMUSG00000019951;	exon:89779835-89780024,exon:89791363-89791481	HFD_2	4	46	Uhrf1bp1l	UHRF1-binding protein 1-like||-||Vacuolar protein sorting-associated protein 13, N-terminal domain	0	0	0	0	4	0	0	0	0	0	0	0	0	67.4047	0	0	0	0	0	0	NA	NA	NA	NA	1.26872	0	2.7352	0.49101	0.98087	FALSE	1.30496	0	2.8159	0.47832	0.99144	FALSE
novel_circ_0000706	10	89787104	89794624	+	7520	439	ENSMUSG00000019951;	exon:89787105-89787285,exon:89791363-89791481,exon:89794483-89794624	CON_1,CON_3,HFD_1,HFD_3,HSD_1,HSD_2,HSD_3	5,2,6,3,3,4,4	14,36,38,27,24,47,29	Uhrf1bp1l	UHRF1-binding protein 1-like||-||Vacuolar protein sorting-associated protein 13, N-terminal domain	5	0	2	6	0	3	3	4	4	98.2473	0	38.1221	84.4654	0	56.816	55.9587	57.7434	79.4802	3.46169	2.47222	0.50342	0.72877	0.99146	FALSE	2.64925	2.54019	0.084151	0.96079	0.99903	FALSE	2.74266	3.69074	-0.41248	0.76141	0.99761	FALSE
novel_circ_0000707	10	89811486	89816221	+	4735	542	ENSMUSG00000019951;	exon:89811487-89811740,exon:89812044-89812152,exon:89816040-89816221	CON_2	2	68	Uhrf1bp1l	UHRF1-binding protein 1-like||-||Vacuolar protein sorting-associated protein 13, N-terminal domain	0	2	0	0	0	0	0	0	0	0	33.8805	0	0	0	0	0	0	0	0	0.615455	-1.8435	0.6488	0.98499	FALSE	0	0.633264	-1.9087	0.63725	0.98087	FALSE	0	0	NA	NA	NA	NA
novel_circ_0000700	10	89772586	89782740	+	10154	170	ENSMUSG00000019951;	exon:89782570-89782740	HSD_3	2	70	Uhrf1bp1l	UHRF1-binding protein 1-like||-||Vacuolar protein sorting-associated protein 13, N-terminal domain	0	0	0	0	0	0	0	0	2	0	0	0	0	0	0	0	0	39.7401	0.692946	0	1.8892	0.63904	0.98499	FALSE	0	0	NA	NA	NA	NA	0	0.736264	-2.0487	0.61104	0.99144	FALSE
novel_circ_0000701	10	89772586	89794624	+	22038	259	ENSMUSG00000019951;	exon:89791363-89791481,exon:89794483-89794624	HSD_2	3	68	Uhrf1bp1l	UHRF1-binding protein 1-like||-||Vacuolar protein sorting-associated protein 13, N-terminal domain	0	0	0	0	0	0	0	3	0	0	0	0	0	0	0	0	43.3075	0	0.800071	0	2.1371	0.59397	0.98499	FALSE	0	0	NA	NA	NA	NA	0	0.844554	-2.2881	0.56827	0.99144	FALSE
novel_circ_0000702	10	89774079	89787285	+	13206	309	ENSMUSG00000019951;	exon:89774080-89774118,exon:89775939-89776030,exon:89787105-89787285	CON_1,HFD_1,HFD_3	5,7,4	22,45,30	Uhrf1bp1l	UHRF1-binding protein 1-like||-||Vacuolar protein sorting-associated protein 13, N-terminal domain	5	0	0	7	0	4	0	0	0	98.2473	0	0	98.543	0	75.7547	0	0	0	0	1.78887	-3.3609	0.39563	0.98499	FALSE	3.26528	1.83454	0.84412	0.74935	0.9928	FALSE	3.37808	0	4.1925	0.12312	0.99144	FALSE
novel_circ_0005482	17	26218123	26220580	-	2457	194	ENSMUSG00000024187;	exon:26218124-26218318	HFD_2	3	193	Fam234a	WD40/YVTN repeat-like-containing domain superfamily||-||Quinoprotein alcohol dehydrogenase-like superfamily	0	0	0	0	3	0	0	0	0	0	0	0	0	50.5536	0	0	0	0	0	0	NA	NA	NA	NA	0.951542	0	2.3196	0.5613	0.98087	FALSE	0.978717	0	2.4003	0.54776	0.99144	FALSE
novel_circ_0005951	17	80408245	80422785	-	14540	219	ENSMUSG00000024241;	exon:80408246-80408362,exon:80422682-80422785	CON_1,HFD_1,HFD_3,HSD_1	3,2,3,2	11,12,20,8	Sos1	Ras-like guanine nucleotide exchange factor||Ras guanine-nucleotide exchange factor catalytic domain superfamily||PH-like domain superfamily||Histone-fold||Histone H2A/H2B/H3||Ras guanine-nucleotide exchange factors catalytic domain||Pleckstrin homology domain||Ras-like guanine nucleotide exchange factor, N-terminal||Dbl homology (DH) domain||Dbl homology (DH) domain superfamily||Ras guanine nucl…	3	0	0	2	0	3	2	0	0	58.9484	0	0	28.1551	0	56.816	37.3058	0	0	0.672692	1.07332	-0.67786	0.85334	0.9996	FALSE	1.58103	1.10073	0.53176	0.85158	0.99903	FALSE	1.62749	0.728095	1.1793	0.6994	0.99614	FALSE
novel_circ_0012325	5	24483340	24493126	+	9786	364	ENSMUSG00000023353;	exon:24483341-24483433,exon:24487789-24487893,exon:24492958-24493126	CON_1,CON_2,HFD_2,HFD_3,HSD_1,HSD_3	4,3,6,2,3,14	31,36,34,36,29,41	Agap3	ArfGAP domain superfamily||Arf GTPase activating protein||Ankyrin repeat-containing domain superfamily||ARFGAP/RecO-like zinc finger||Ankyrin repeat||PH-like domain superfamily||Small GTPase superfamily, Ras-type||Small GTPase||Ankyrin repeat-containing domain||P-loop containing nucleoside triphosphate hydrolase||Pleckstrin homology domain	4	3	0	0	6	2	3	0	14	78.5978	50.8208	0	0	101.107	37.8774	55.9587	0	278.181	5.85966	2.35428	1.3091	0.50824	0.98499	FALSE	2.60103	2.41753	0.095221	0.95666	0.99903	FALSE	2.67071	6.24599	-1.226	0.55623	0.99144	FALSE
novel_circ_0012324	5	24441335	24441663	-	328	249	ENSMUSG00000028959;	exon:24441336-24441450,exon:24441528-24441663	CON_2,CON_3,HFD_1	3,2,2	48,47,26	Fastk	FAST kinase-like protein, subdomain 2||-||FAST kinase leucine-rich||RAP domain||Fas activated serine/threonine kinase FAST	0	3	2	2	0	0	0	0	0	0	50.8208	38.1221	28.1551	0	0	0	0	0	0	1.60653	-3.215	0.38144	0.98499	FALSE	0.534108	1.65554	-1.591	0.60589	0.98087	FALSE	0.557583	0	1.6184	0.68858	0.99144	FALSE
novel_circ_0012327	5	24573421	24574379	-	958	212	ENSMUSG00000028953;	exon:24574167-24574379	HSD_2,HSD_3	4,3	39,44	Abcf2	ABC transporter-like||ABC-transporter extension domain||P-loop containing nucleoside triphosphate hydrolase||AAA+ ATPase domain||ABC transporter, conserved site	0	0	0	0	0	0	0	4	3	0	0	0	0	0	0	0	57.7434	59.6101	2.10618	0	3.5127	0.29891	0.98499	FALSE	0	0	NA	NA	NA	NA	0	2.23047	-3.6673	0.27573	0.99144	FALSE
novel_circ_0012326	5	24487788	24493126	+	5338	272	ENSMUSG00000023353;	exon:24487789-24487893,exon:24492958-24493126	CON_2,CON_3,HSD_2	3,5,2	48,24,66	Agap3	ArfGAP domain superfamily||Arf GTPase activating protein||Ankyrin repeat-containing domain superfamily||ARFGAP/RecO-like zinc finger||Ankyrin repeat||PH-like domain superfamily||Small GTPase superfamily, Ras-type||Small GTPase||Ankyrin repeat-containing domain||P-loop containing nucleoside triphosphate hydrolase||Pleckstrin homology domain	0	3	5	0	0	0	0	2	0	0	50.8208	95.3053	0	0	0	0	28.8717	0	0.53338	2.63154	-2.2364	0.39409	0.98499	FALSE	0	2.71401	-3.9929	0.19183	0.98087	FALSE	0	0.563036	-1.7139	0.67182	0.99144	FALSE
novel_circ_0012321	5	24126821	24141293	+	14472	102	ENSMUSG00000028986;	exon:24126822-24126924	CON_3,HFD_1,HFD_2,HFD_3,HSD_2	3,4,9,2,2	24,20,37,35,52	Klhl7	-||SKP1/BTB/POZ domain superfamily||BTB/POZ domain||BTB-kelch protein||BTB/Kelch-associated||Kelch repeat type 1||Kelch-like protein 7||Kelch-type beta propeller	0	0	3	4	9	2	0	2	0	0	0	57.1832	56.3103	151.661	37.8774	0	28.8717	0	0.53338	1.02501	-0.90271	0.81079	0.9996	FALSE	4.62079	1.05847	2.1402	0.1961	0.98087	FALSE	4.76459	0.563036	2.953	0.10269	0.99144	FALSE
novel_circ_0012320	5	24126821	24128104	+	1283	319	ENSMUSG00000028986;	exon:24126822-24126924,exon:24127669-24127762,exon:24127980-24128104	CON_1,CON_2,CON_3,HFD_1,HFD_2,HFD_3,HSD_1,HSD_2,HSD_3	4,7,4,14,4,11,4,14,6	14,37,24,20,43,49,28,57,36	Klhl7	-||SKP1/BTB/POZ domain superfamily||BTB/POZ domain||BTB-kelch protein||BTB/Kelch-associated||Kelch repeat type 1||Kelch-like protein 7||Kelch-type beta propeller	4	7	4	14	4	11	4	14	6	78.5978	118.582	76.2442	197.086	67.4047	208.325	74.6116	202.102	119.22	7.15788	4.95188	0.54185	0.52538	0.98499	FALSE	8.8462	5.09535	0.79036	0.31879	0.98087	FALSE	9.13103	7.60623	0.24401	0.74052	0.99761	FALSE
novel_circ_0012323	5	24134963	24141293	+	6330	142	ENSMUSG00000028986;	exon:24141151-24141293	HFD_1,HFD_2	3,3	14,23	Klhl7	-||SKP1/BTB/POZ domain superfamily||BTB/POZ domain||BTB-kelch protein||BTB/Kelch-associated||Kelch repeat type 1||Kelch-like protein 7||Kelch-type beta propeller	0	0	0	3	3	0	0	0	0	0	0	0	42.2327	50.5536	0	0	0	0	0	0	NA	NA	NA	NA	1.7527	0	3.2084	0.36417	0.98087	FALSE	1.81509	0	3.2982	0.36296	0.99144	FALSE
novel_circ_0012322	5	24126821	24149365	+	22544	342	ENSMUSG00000028986;	exon:24126822-24126924,exon:24149125-24149365	CON_1	3	11	Klhl7	-||SKP1/BTB/POZ domain superfamily||BTB/POZ domain||BTB-kelch protein||BTB/Kelch-associated||Kelch repeat type 1||Kelch-like protein 7||Kelch-type beta propeller	3	0	0	0	0	0	0	0	0	58.9484	0	0	0	0	0	0	0	0	0	1.07332	-2.6209	0.51123	0.98499	FALSE	0	1.10073	-2.6818	0.50149	0.98087	FALSE	0	0	NA	NA	NA	NA
novel_circ_0003359	13	94390791	94408843	+	18052	470	ENSMUSG00000021686;	exon:94390792-94390867,exon:94394719-94394793,exon:94403338-94403433,exon:94403947-94404107,exon:94408777-94408843	CON_1,CON_2,CON_3,HFD_2,HFD_3,HSD_1,HSD_3	11,6,9,6,5,10,3	59,86,68,86,62,36,89	Ap3b1	AP-3 complex subunit beta, C-terminal domain||AP complex subunit beta||Clathrin/coatomer adaptor, adaptin-like, N-terminal||Beta-adaptin appendage, C-terminal subdomain||AP-3 complex subunit beta||Armadillo-type fold||AP-3 complex subunit beta 1, serine-rich domain||Armadillo-like helical	11	6	9	0	6	5	10	0	3	216.144	101.642	171.549	0	101.107	94.6934	186.529	0	59.6101	4.40288	8.85693	-1.0266	0.38852	0.98499	FALSE	3.64796	9.11118	-1.355	0.13809	0.98087	FALSE	3.74061	4.74487	-0.34243	0.86157	0.99761	FALSE
novel_circ_0012328	5	24592754	24593804	+	1050	451	ENSMUSG00000038181;ENSMUSG00000028949;	exon:24592755-24592846,exon:24593179-24593353,exon:24593618-24593804	HFD_1,HFD_2	2,6	4,9	Chpf2;Smarcd3	-	0	0	0	2	6	0	0	0	0	0	0	0	28.1551	101.107	0	0	0	0	0	0	NA	NA	NA	NA	2.43719	0	3.6804	0.2519	0.98087	FALSE	2.51502	0	3.7656	0.24012	0.99144	FALSE
novel_circ_0006665	19	10621540	10623638	+	2098	289	ENSMUSG00000024740;	exon:10621541-10621719,exon:10623527-10623638	CON_1,CON_2,CON_3,HFD_1,HFD_2,HFD_3,HSD_1,HSD_2,HSD_3	3,9,6,20,5,5,6,2,3	6.13108e+27	Ddb1	Cleavage/polyadenylation specificity factor, A subunit, C-terminal||WD40/YVTN repeat-like-containing domain superfamily||DNA damage-binding protein 1||Quinoprotein alcohol dehydrogenase-like superfamily	3	9	6	20	5	5	6	2	3	58.9484	152.462	114.366	281.551	84.2559	94.6934	111.917	28.8717	59.6101	3.59087	5.8929	-0.74229	0.46299	0.98499	FALSE	8.67186	6.06734	0.5265	0.507	0.98087	FALSE	8.9902	3.85172	1.267	0.1604	0.99144	FALSE
novel_circ_0016673	X	151547394	151556135	+	8741	247	ENSMUSG00000041229;	exon:151547395-151547480,exon:151555973-151556135	CON_3	4	18	Phf8	Zinc finger, PHD-type, conserved site||JmjC domain||Jumonji, helical domain||Zinc finger, FYVE/PHD-type||Zinc finger, PHD-finger||Zinc finger, PHD-type	0	0	4	0	0	0	0	0	0	0	0	76.2442	0	0	0	0	0	0	0	1.36668	-2.9759	0.4537	0.98499	FALSE	0	1.41129	-3.046	0.44311	0.98087	FALSE	0	0	NA	NA	NA	NA
novel_circ_0006660	19	10606844	10608472	+	1628	369	ENSMUSG00000024740;	exon:10606845-10606993,exon:10608251-10608472	HSD_1	2	1223	Ddb1	Cleavage/polyadenylation specificity factor, A subunit, C-terminal||WD40/YVTN repeat-like-containing domain superfamily||DNA damage-binding protein 1||Quinoprotein alcohol dehydrogenase-like superfamily	0	0	0	0	0	0	2	0	0	0	0	0	0	0	0	37.3058	0	0	0.672692	0	1.8517	0.64596	0.98499	FALSE	0	0	NA	NA	NA	NA	0	0.728095	-2.0346	0.6136	0.99144	FALSE
novel_circ_0006663	19	10610701	10623638	+	12937	320	ENSMUSG00000024740;	exon:10610702-10610816,exon:10623339-10623434,exon:10623527-10623638	HFD_1,HSD_1	6,2	826724	Ddb1	Cleavage/polyadenylation specificity factor, A subunit, C-terminal||WD40/YVTN repeat-like-containing domain superfamily||DNA damage-binding protein 1||Quinoprotein alcohol dehydrogenase-like superfamily	0	0	0	6	0	0	2	0	0	0	0	0	84.4654	0	0	37.3058	0	0	0.672692	0	1.8517	0.64596	0.98499	FALSE	1.60233	0	3.0852	0.43566	0.98087	FALSE	1.67275	0.728095	1.2332	0.71142	0.99614	FALSE
novel_circ_0006662	19	10606844	10619328	+	12484	183	ENSMUSG00000024740;	exon:10619049-10619124,exon:10619220-10619328	HSD_1	5	1110	Ddb1	Cleavage/polyadenylation specificity factor, A subunit, C-terminal||WD40/YVTN repeat-like-containing domain superfamily||DNA damage-binding protein 1||Quinoprotein alcohol dehydrogenase-like superfamily	0	0	0	0	0	0	5	0	0	0	0	0	0	0	0	93.2644	0	0	1.68173	0	3.1802	0.42154	0.98499	FALSE	0	0	NA	NA	NA	NA	0	1.82024	-3.3646	0.39506	0.99144	FALSE
novel_circ_0006669	19	11923386	11925226	+	1840	395	ENSMUSG00000046139;	exon:11923387-11923476,exon:11923801-11924018,exon:11925137-11925226	CON_2,HFD_3,HSD_1	2,3,3	22,16,6	Patl1	mRNA decay factor PAT1 domain||Pat1-like||-	0	2	0	0	0	3	3	0	0	0	33.8805	0	0	0	56.816	55.9587	0	0	1.00904	0.615455	0.6856	0.85436	0.9996	FALSE	1.04692	0.633264	0.68862	0.85047	0.99903	FALSE	1.06991	1.09214	-0.034552	0.99207	0.99761	FALSE
novel_circ_0006524	18	74577454	74580534	+	3080	315	ENSMUSG00000025885;	exon:74577455-74577626,exon:74580390-74580534	CON_1,CON_2,CON_3,HFD_1,HFD_2,HFD_3,HSD_1,HSD_2,HSD_3	11,15,8,20,18,23,25,18,31	7,23,13,13,17,19,16,24,19	Myo5b	-||Myosin head, motor domain||Dilute domain||P-loop containing nucleoside triphosphate hydrolase||Class V myosin, motor domain||IQ motif, EF-hand binding site||Kinesin motor domain superfamily||Myosin 5b, cargo-binding domain||Myosin, N-terminal, SH3-like||Myosin S1 fragment, N-terminal	11	15	8	20	18	23	25	18	31	216.144	254.104	152.488	281.551	303.321	435.59	466.322	259.845	615.972	23.9497	11.2848	1.0693	0.035667	0.98499	TRUE	19.0767	11.608	0.70477	0.17008	0.98087	FALSE	19.6508	25.5806	-0.373	0.40058	0.99144	FALSE
novel_circ_0013814	7	110052710	110054116	+	1406	322	ENSMUSG00000066232;	exon:110052711-110052917,exon:110054000-110054116	CON_1,CON_2,CON_3,HFD_1,HFD_2,HFD_3,HSD_2	4,5,4,5,7,2,4	1.52303e+20	Ipo7	Armadillo-type fold||Exportin-2, central domain||Armadillo-like helical||Importin-beta, N-terminal domain||-	4	5	4	5	7	2	0	4	0	78.5978	84.7013	76.2442	70.3878	117.958	37.8774	0	57.7434	0	1.06676	4.33642	-1.9408	0.24321	0.98499	FALSE	4.25348	4.46208	-0.064489	0.94943	0.99903	FALSE	4.3909	1.12607	1.8772	0.25797	0.99144	FALSE
novel_circ_0013815	7	110124457	110130975	+	6520	532	ENSMUSG00000031016;	exon:110124456-110124661,exon:110125807-110125867,exon:110126701-110126822,exon:110130829-110130975	CON_1,CON_2,HFD_1,HFD_3	4,5,2,7	5,16,16,6	Wee1	Wee1-like protein kinase||Protein kinase-like domain superfamily||Protein kinase, ATP binding site||Serine/threonine-protein kinase, active site||Protein kinase domain	4	5	0	2	0	7	0	0	0	78.5978	84.7013	0	28.1551	0	132.571	0	0	0	0	2.96974	-4.0984	0.15959	0.98499	FALSE	2.97693	3.05079	-0.058205	0.97056	0.99903	FALSE	3.05403	0	4.0386	0.16705	0.99144	FALSE
novel_circ_0013816	7	110124455	110139707	+	15252	145	ENSMUSG00000031016;	exon:110139562-110139707	CON_1	3	12	Wee1	Wee1-like protein kinase||Protein kinase-like domain superfamily||Protein kinase, ATP binding site||Serine/threonine-protein kinase, active site||Protein kinase domain	3	0	0	0	0	0	0	0	0	58.9484	0	0	0	0	0	0	0	0	0	1.07332	-2.6209	0.51123	0.98499	FALSE	0	1.10073	-2.6818	0.50149	0.98087	FALSE	0	0	NA	NA	NA	NA
novel_circ_0013817	7	110125806	110126822	+	1016	353	ENSMUSG00000031016;	exon:110125807-110125867,exon:110125996-110126168,exon:110126701-110126822	HSD_2	4	14	Wee1	Wee1-like protein kinase||Protein kinase-like domain superfamily||Protein kinase, ATP binding site||Serine/threonine-protein kinase, active site||Protein kinase domain	0	0	0	0	0	0	0	4	0	0	0	0	0	0	0	0	57.7434	0	1.06676	0	2.5468	0.52266	0.98499	FALSE	0	0	NA	NA	NA	NA	0	1.12607	-2.6973	0.49846	0.99144	FALSE
novel_circ_0003058	13	45839737	45852456	-	12719	439	ENSMUSG00000046876;	intron:45839738-45839932,intron:45840020-45840137,intron:45852328-45852456	CON_2	2	90	Atxn1	Ataxin, AXH domain superfamily||Ataxin, AXH domain||Ataxin-1||Capicua transcriptional repressor modulator, Ataxin-1	0	2	0	0	0	0	0	0	0	0	33.8805	0	0	0	0	0	0	0	0	0.615455	-1.8435	0.6488	0.98499	FALSE	0	0.633264	-1.9087	0.63725	0.98087	FALSE	0	0	NA	NA	NA	NA
novel_circ_0013812	7	110029690	110031766	+	2076	311	ENSMUSG00000066232;	exon:110029691-110029844,exon:110031608-110031766	HSD_2	6	187	Ipo7	Armadillo-type fold||Exportin-2, central domain||Armadillo-like helical||Importin-beta, N-terminal domain||-	0	0	0	0	0	0	0	6	0	0	0	0	0	0	0	0	86.6151	0	1.60014	0	3.126	0.42972	0.98499	FALSE	0	0	NA	NA	NA	NA	0	1.68911	-3.2762	0.40796	0.99144	FALSE
novel_circ_0003055	13	45795508	45852456	-	56948	256	ENSMUSG00000046876;	exon:45795509-45795637,exon:45852328-45852456	CON_1,HFD_1,HFD_3,HSD_2,HSD_3	4,4,7,5,7	100123130169115	Atxn1	Ataxin, AXH domain superfamily||Ataxin, AXH domain||Ataxin-1||Capicua transcriptional repressor modulator, Ataxin-1	4	0	0	4	0	7	0	5	7	78.5978	0	0	56.3103	0	132.571	0	72.1792	139.09	3.75876	1.4311	1.4062	0.58551	0.98499	FALSE	3.51104	1.46763	1.2675	0.62601	0.98087	FALSE	3.61162	3.98451	-0.14824	0.93353	0.99761	FALSE
novel_circ_0016677	X	151597300	151599584	+	2284	263	ENSMUSG00000041229;	exon:151597301-151597479,exon:151597900-151597985	HFD_1	5	9	Phf8	Zinc finger, PHD-type, conserved site||JmjC domain||Jumonji, helical domain||Zinc finger, FYVE/PHD-type||Zinc finger, PHD-finger||Zinc finger, PHD-type	0	0	0	5	0	0	0	0	0	0	0	0	70.3878	0	0	0	0	0	0	0	NA	NA	NA	NA	1.33527	0	2.8242	0.47659	0.98087	FALSE	1.39396	0	2.925	0.46093	0.99144	FALSE
novel_circ_0013818	7	110125806	110130975	+	5169	353	ENSMUSG00000031016;	exon:110125807-110125867,exon:110125996-110126168,exon:110126701-110126822	CON_1,CON_2,CON_3,HFD_1,HFD_2,HFD_3,HSD_1,HSD_2	5,4,12,7,2,5,4,2	10,22,17,23,7,9,7,11	Wee1	Wee1-like protein kinase||Protein kinase-like domain superfamily||Protein kinase, ATP binding site||Serine/threonine-protein kinase, active site||Protein kinase domain	5	4	12	7	2	5	4	2	0	98.2473	67.761	228.733	98.543	33.7024	94.6934	74.6116	28.8717	0	1.87876	7.11984	-1.9197	0.098895	0.98499	FALSE	4.24861	7.33494	-0.77722	0.3851	0.98087	FALSE	4.3872	2.01923	1.1267	0.41894	0.99144	FALSE
novel_circ_0013819	7	110126700	110139707	+	13007	121	ENSMUSG00000031016;	exon:110126701-110126822	CON_2,HFD_3	2,2	33,19	Wee1	Wee1-like protein kinase||Protein kinase-like domain superfamily||Protein kinase, ATP binding site||Serine/threonine-protein kinase, active site||Protein kinase domain	0	2	0	0	0	2	0	0	0	0	33.8805	0	0	0	37.8774	0	0	0	0	0.615455	-1.8435	0.6488	0.98499	FALSE	0.697949	0.633264	0.098811	0.97933	0.99903	FALSE	0.713271	0	1.9267	0.63226	0.99144	FALSE
novel_circ_0004714	15	93424013	93441712	+	17699	272	ENSMUSG00000036167;	exon:93424014-93424075,exon:93441501-93441712	CON_1,CON_2,CON_3,HFD_1,HSD_2	5,2,4,5,7	14,28,36,17,19	Pphln1	Periphilin-1	5	2	4	5	0	0	0	7	0	98.2473	33.8805	76.2442	70.3878	0	0	0	101.051	0	1.86683	3.77101	-0.95526	0.56114	0.98499	FALSE	1.33527	3.87909	-1.4735	0.38412	0.98087	FALSE	1.39396	1.97062	-0.49912	0.89643	0.99761	FALSE
novel_circ_0012497	5	36512453	36525048	-	12595	294	ENSMUSG00000029192;	exon:36512454-36512548,exon:36522927-36523009,exon:36524930-36525048	CON_3,HFD_1	2,2	14,21	Tbc1d14	Rab-GTPase-TBC domain superfamily||-||Rab-GTPase-TBC domain	0	0	2	2	0	0	0	0	0	0	0	38.1221	28.1551	0	0	0	0	0	0	0.683342	-1.9743	0.6247	0.98499	FALSE	0.534108	0.705644	-0.36514	0.9244	0.99903	FALSE	0.557583	0	1.6184	0.68858	0.99144	FALSE
novel_circ_0012496	5	36505024	36525048	-	20024	309	ENSMUSG00000029192;	exon:36505025-36505134,exon:36522927-36523009,exon:36524930-36525048	HSD_2	5	32	Tbc1d14	Rab-GTPase-TBC domain superfamily||-||Rab-GTPase-TBC domain	0	0	0	0	0	0	0	5	0	0	0	0	0	0	0	0	72.1792	0	1.33345	0	2.8653	0.47032	0.98499	FALSE	0	0	NA	NA	NA	NA	0	1.40759	-3.0156	0.44743	0.99144	FALSE
novel_circ_0012495	5	36505024	36520561	-	15537	188	ENSMUSG00000029192;	exon:36508360-36508431,exon:36520444-36520561	CON_2,HFD_1	6,3	41,28	Tbc1d14	Rab-GTPase-TBC domain superfamily||-||Rab-GTPase-TBC domain	0	6	0	3	0	0	0	0	0	0	101.642	0	42.2327	0	0	0	0	0	0	1.84637	-3.4179	0.38412	0.98499	FALSE	0.801163	1.89979	-1.2236	0.69468	0.98087	FALSE	0.836375	0	2.1951	0.58373	0.99144	FALSE
novel_circ_0012494	5	36505024	36514119	-	9095	80	ENSMUSG00000029192;	exon:36514039-36514119	HFD_2,HFD_3	4,2	14,25	Tbc1d14	Rab-GTPase-TBC domain superfamily||-||Rab-GTPase-TBC domain	0	0	0	0	4	2	0	0	0	0	0	0	0	67.4047	37.8774	0	0	0	0	0	NA	NA	NA	NA	1.96667	0	3.3647	0.32881	0.98087	FALSE	2.01823	0	3.4425	0.32765	0.99144	FALSE
novel_circ_0012492	5	35974387	35984306	+	9919	117	ENSMUSG00000029094;	exon:35984189-35984306	CON_3,HFD_1	2,2	90,88	Afap1	Actin filament-associated protein 1||Pleckstrin homology domain||Actin-filament associated protein||PH-like domain superfamily	0	0	2	2	0	0	0	0	0	0	0	38.1221	28.1551	0	0	0	0	0	0	0.683342	-1.9743	0.6247	0.98499	FALSE	0.534108	0.705644	-0.36514	0.9244	0.99903	FALSE	0.557583	0	1.6184	0.68858	0.99144	FALSE
novel_circ_0012491	5	35961745	35976637	+	14892	246	ENSMUSG00000029094;	exon:35961746-35961847,exon:35976492-35976637	HFD_1	3	66	Afap1	Actin filament-associated protein 1||Pleckstrin homology domain||Actin-filament associated protein||PH-like domain superfamily	0	0	0	3	0	0	0	0	0	0	0	0	42.2327	0	0	0	0	0	0	0	NA	NA	NA	NA	0.801163	0	2.0951	0.6011	0.98087	FALSE	0.836375	0	2.1951	0.58373	0.99144	FALSE
novel_circ_0012490	5	35961745	35968719	+	6974	331	ENSMUSG00000029094;	exon:35961746-35961847,exon:35962205-35962286,exon:35968570-35968719	CON_2,HFD_2,HSD_3	2,2,6	131,45,62	Afap1	Actin filament-associated protein 1||Pleckstrin homology domain||Actin-filament associated protein||PH-like domain superfamily	0	2	0	0	2	0	0	0	6	0	33.8805	0	0	33.7024	0	0	0	119.22	2.07884	0.615455	1.7215	0.58515	0.98499	FALSE	0.634361	0.633264	-0.019993	0.99584	0.99903	FALSE	0.652478	2.20879	-1.7555	0.56941	0.99144	FALSE
novel_circ_0006305	18	42332779	42333397	+	618	292	ENSMUSG00000024491;	exon:42332780-42332884,exon:42333209-42333397	CON_1,CON_2,CON_3,HFD_1,HFD_2,HFD_3,HSD_1,HSD_2,HSD_3	6,6,4,8,2,6,3,6,3	10,24,23,19,25,18,14,13,26	Rbm27	Nucleotide-binding alpha-beta plait domain superfamily||RNA-binding domain superfamily||RNA recognition motif domain||Putative RNA-binding protein 27, RNA recognition motif||PWI domain||Zinc finger, CCCH-type	6	6	4	8	2	6	3	6	3	117.897	101.642	76.2442	112.621	33.7024	113.632	55.9587	86.6151	59.6101	3.6486	5.3597	-0.54157	0.58801	0.98499	FALSE	4.86464	5.51253	-0.17604	0.84814	0.99903	FALSE	5.02262	3.88564	0.36141	0.72712	0.99614	FALSE
novel_circ_0011299	4	41223355	41229848	-	6493	230	ENSMUSG00000028433;	exon:41227199-41227276,exon:41229695-41229848	CON_1	2	21	Ubap2	-||UBA-like superfamily||Ubiquitin-associated domain||UBAP2/protein lingerer	2	0	0	0	0	0	0	0	0	39.2989	0	0	0	0	0	0	0	0	0	0.71555	-2.0323	0.61412	0.98499	FALSE	0	0.733817	-2.0934	0.60355	0.98087	FALSE	0	0	NA	NA	NA	NA
novel_circ_0008947	2	155975670	155976558	+	888	296	ENSMUSG00000038241;	exon:155976084-155976211,exon:155976389-155976558	CON_1,HSD_2	10,2	1,4	Cep250	-	10	0	0	0	0	0	0	2	0	196.495	0	0	0	0	0	0	28.8717	0	0.53338	3.57775	-2.7095	0.48814	0.98499	FALSE	0	3.66909	-4.424	0.26051	0.98087	FALSE	0	0.563036	-1.7139	0.67182	0.99144	FALSE
novel_circ_0008944	2	155887108	155911836	-	24728	95	ENSMUSG00000005882;	exon:155911741-155911836	CON_1,CON_3,HFD_1,HFD_3,HSD_1	3,4,5,4,5	23,45,26,36,32	Uqcc1	-||Ubiquinol-cytochrome c chaperone, CBP3||Ubiquinol-cytochrome c chaperone/UPF0174	3	0	4	5	0	4	5	0	0	58.9484	0	76.2442	70.3878	0	75.7547	93.2644	0	0	1.68173	2.44001	-0.54507	0.80273	0.9996	FALSE	2.73117	2.51201	0.13409	0.93643	0.99903	FALSE	2.8205	1.82024	0.64526	0.80509	0.99761	FALSE
novel_circ_0011679	4	99744489	99753191	+	8702	311	ENSMUSG00000073792;	exon:99744490-99744625,exon:99753015-99753191	CON_1,CON_2,CON_3,HFD_1,HFD_2,HFD_3,HSD_1,HSD_2,HSD_3	3,5,3,7,6,10,5,4,2	2,13,12,4,11,5,10,9,4	Alg6	Dolichyl pyrophosphate Man9GlcNAc2 alpha-1,3-glucosyltransferase||Glycosyl transferase, ALG6/ALG8	3	5	3	7	6	10	5	4	2	58.9484	84.7013	57.1832	98.543	101.107	189.387	93.2644	57.7434	39.7401	3.44144	3.63698	-0.084592	0.94283	0.9996	FALSE	7.26221	3.74235	0.93943	0.29193	0.98087	FALSE	7.47533	3.68257	1.016	0.26356	0.99144	FALSE
novel_circ_0008942	2	155644927	155650585	-	5658	297	ENSMUSG00000038324;	exon:155644928-155645059,exon:155650419-155650585	HFD_2,HFD_3	4,2	133,96	Trpc4ap	Short transient receptor potential channel 4-associated protein||Armadillo-type fold	0	0	0	0	4	2	0	0	0	0	0	0	0	67.4047	37.8774	0	0	0	0	0	NA	NA	NA	NA	1.96667	0	3.3647	0.32881	0.98087	FALSE	2.01823	0	3.4425	0.32765	0.99144	FALSE
novel_circ_0016248	9	70561775	70562861	+	1086	244	ENSMUSG00000032212;	exon:70561776-70561973,exon:70562814-70562861	CON_1	4	18	Sltm	RNA-binding domain superfamily||SAFB-like transcription modulator||Nucleotide-binding alpha-beta plait domain superfamily||RNA recognition motif domain||SAP domain superfamily||SAP domain||-	4	0	0	0	0	0	0	0	0	78.5978	0	0	0	0	0	0	0	0	0	1.4311	-3.0378	0.44404	0.98499	FALSE	0	1.46763	-3.0986	0.435	0.98087	FALSE	0	0	NA	NA	NA	NA
novel_circ_0008940	2	155432815	155440785	-	7970	122	ENSMUSG00000038369;	exon:155432816-155432938	CON_1,CON_2,CON_3,HFD_1,HFD_2,HFD_3,HSD_1,HSD_2,HSD_3	7,13,11,15,13,7,6,7,3	6,18,12,13,16,15,15,9,28	Ncoa6	Nuclear receptor coactivator 6||Nuclear receptor coactivator 6, putative nucleic acid-binding region	7	13	11	15	13	7	6	7	3	137.546	220.223	209.672	211.164	219.065	132.571	111.917	101.051	59.6101	4.92433	10.2633	-1.0548	0.15829	0.98499	FALSE	10.572	10.5656	0.0043778	0.99427	0.99903	FALSE	10.9194	5.25931	1.0529	0.14861	0.99144	FALSE
novel_circ_0008941	2	155437859	155440785	-	2926	376	ENSMUSG00000038369;	exon:155437860-155438139,exon:155440688-155440785	CON_1,CON_2,CON_3,HFD_1,HFD_2,HFD_3,HSD_1,HSD_2,HSD_3	30,42,38,29,35,31,26,42,34	21,37,26,31,23,20,30,19,35	Ncoa6	Nuclear receptor coactivator 6||Nuclear receptor coactivator 6, putative nucleic acid-binding region	30	42	38	29	35	31	26	42	34	589.484	711.491	724.32	408.249	589.792	587.099	484.975	606.306	675.582	31.7261	36.6413	-0.20797	0.54554	0.98499	FALSE	29.6641	37.713	-0.35593	0.30431	0.98087	FALSE	30.559	33.8055	-0.15394	0.6655	0.99144	FALSE
novel_circ_0011672	4	99078865	99083182	-	4317	85	ENSMUSG00000028556;	exon:99078866-99078951	HFD_1,HFD_3,HSD_1,HSD_3	2,4,2,6	14,25,10,24	Dock7	-||Dedicator of cytokinesis C, C2 domain||Dedicator of cytokinesis C/D, N-terminal||C2 domain superfamily||Dedicator of cytokinesis||Dedicator of cytokinesis, C-terminal||DHR-2 domain||DHR-1 domain	0	0	0	2	0	4	2	0	6	0	0	0	28.1551	0	75.7547	37.3058	0	119.22	2.75153	0	3.888	0.2035	0.98499	FALSE	1.93001	0	3.3382	0.33493	0.98087	FALSE	1.98413	2.93689	-0.55909	0.75746	0.99761	FALSE
novel_circ_0011673	4	99212576	99221522	+	8946	134	ENSMUSG00000028550;	exon:99212577-99212711	HFD_3	2	20	Atg4c	Peptidase C54||Papain-like cysteine peptidase superfamily||Cysteine protease ATG4C	0	0	0	0	0	2	0	0	0	0	0	0	0	0	37.8774	0	0	0	0	0	NA	NA	NA	NA	0.697949	0	1.854	0.64509	0.98087	FALSE	0.713271	0	1.9267	0.63226	0.99144	FALSE
novel_circ_0011671	4	99070177	99083182	-	13005	234	ENSMUSG00000028556;	exon:99070178-99070327,exon:99078866-99078951	HFD_3	2	19	Dock7	-||Dedicator of cytokinesis C, C2 domain||Dedicator of cytokinesis C/D, N-terminal||C2 domain superfamily||Dedicator of cytokinesis||Dedicator of cytokinesis, C-terminal||DHR-2 domain||DHR-1 domain	0	0	0	0	0	2	0	0	0	0	0	0	0	0	37.8774	0	0	0	0	0	NA	NA	NA	NA	0.697949	0	1.854	0.64509	0.98087	FALSE	0.713271	0	1.9267	0.63226	0.99144	FALSE
novel_circ_0008948	2	155979143	155983416	+	4273	300	ENSMUSG00000038241;	exon:155979144-155979311,exon:155983283-155983416	HFD_1	4	5	Cep250	-	0	0	0	4	0	0	0	0	0	0	0	0	56.3103	0	0	0	0	0	0	0	NA	NA	NA	NA	1.06822	0	2.5053	0.52931	0.98087	FALSE	1.11517	0	2.6058	0.51284	0.99144	FALSE
novel_circ_0008949	2	156073798	156079464	-	5666	125	ENSMUSG00000074643;ENSMUSG00000098950;	exon:156079339-156079464	HFD_1,HSD_3	2,2	54,78	Cpne1;Gm28036	-	0	0	0	2	0	0	0	0	2	0	0	0	28.1551	0	0	0	0	39.7401	0.692946	0	1.8892	0.63904	0.98499	FALSE	0.534108	0	1.5189	0.70802	0.98087	FALSE	0.557583	0.736264	-0.35722	0.92833	0.99761	FALSE
novel_circ_0011566	4	86599258	86607990	-	8732	265	ENSMUSG00000038047;	exon:86599259-86599429,exon:86607895-86607990	HSD_1,HSD_3	6,3	3,6	Haus6	HAUS augmin-like complex subunit 6||HAUS augmin-like complex subunit 6, N-terminal	0	0	0	0	0	0	6	0	3	0	0	0	0	0	0	111.917	0	59.6101	3.05749	0	4.0411	0.16106	0.98499	FALSE	0	0	NA	NA	NA	NA	0	3.28868	-4.2162	0.12978	0.99144	FALSE
novel_circ_0004719	15	93455450	93465245	+	9795	338	ENSMUSG00000036167;	exon:93455451-93455530,exon:93459672-93459791,exon:93465105-93465245	CON_1,CON_2,CON_3,HFD_1,HFD_3,HSD_1,HSD_2,HSD_3	8,10,14,16,3,9,10,9	15,22,35,17,9,8,25,21	Pphln1	Periphilin-1	8	10	14	16	0	3	9	10	9	157.196	169.403	266.855	225.241	0	56.816	167.876	144.358	178.83	8.81227	10.7229	-0.28628	0.65251	0.98499	FALSE	5.31979	11.0411	-1.0326	0.39379	0.98087	FALSE	5.53057	9.40479	-0.74513	0.53334	0.99144	FALSE
novel_circ_0005200	16	55980594	55991618	+	11024	176	ENSMUSG00000022601;	exon:55991442-55991618	CON_3	2	9	Zbtb11	Integrase zinc-binding domain||Zinc finger C2H2 superfamily||Zinc finger C2H2-type||BTB/POZ domain||SKP1/BTB/POZ domain superfamily	0	0	2	0	0	0	0	0	0	0	0	38.1221	0	0	0	0	0	0	0	0.683342	-1.9743	0.6247	0.98499	FALSE	0	0.705644	-2.0441	0.61248	0.98087	FALSE	0	0	NA	NA	NA	NA
novel_circ_0011564	4	86599258	86601288	-	2030	170	ENSMUSG00000038047;	exon:86599259-86599429	CON_1	2	15	Haus6	HAUS augmin-like complex subunit 6||HAUS augmin-like complex subunit 6, N-terminal	2	0	0	0	0	0	0	0	0	39.2989	0	0	0	0	0	0	0	0	0	0.71555	-2.0323	0.61412	0.98499	FALSE	0	0.733817	-2.0934	0.60355	0.98087	FALSE	0	0	NA	NA	NA	NA
novel_circ_0015064	8	40499294	40510226	-	10932	355	ENSMUSG00000031601;	exon:40499295-40499439,exon:40510015-40510226	CON_2,HFD_2,HSD_2	2,4,2	39,33,41	Cnot7	CCR4-NOT transcription complex subunit 7||Ribonuclease CAF1||Ribonuclease H-like superfamily||Ribonuclease H superfamily||CCR4-NOT transcription complex subunit 7/8/Pop2	0	2	0	0	4	0	0	2	0	0	33.8805	0	0	67.4047	0	0	28.8717	0	0.53338	0.615455	-0.18905	0.96192	0.9996	FALSE	1.26872	0.633264	0.97944	0.78206	0.99903	FALSE	1.30496	0.563036	1.1694	0.7503	0.99761	FALSE
novel_circ_0013324	6	35077980	35080226	-	2246	462	ENSMUSG00000038784;	exon:35077981-35078178,exon:35079961-35080226	CON_1,CON_3,HFD_1,HFD_2,HFD_3,HSD_1,HSD_2,HSD_3	43,29,25,37,18,21,37,30	21,25,42,19,42,39,39,25	Cnot4	Nucleotide-binding alpha-beta plait domain superfamily||RNA recognition motif domain||Zinc finger, CCCH-type||NOT4, modified RING finger, HC subclass (C4C4-type)||RNA-binding domain superfamily||RNA recognition motif domain, eukaryote||Zinc finger, RING/FYVE/PHD-type||Zinc finger, RING-type||CCR4-NOT transcription complex subunit 4||CNOT4, RNA recognition motif	43	0	29	25	37	18	21	37	30	844.927	0	552.771	351.939	623.494	340.896	391.711	534.126	596.101	27.325	25.2928	0.11339	0.93825	0.9996	FALSE	24.6936	26.0089	-0.07328	0.96065	0.99903	FALSE	25.4601	29.1051	-0.19633	0.62405	0.99144	FALSE
novel_circ_0011291	4	41174040	41189286	+	15246	220	ENSMUSG00000036241;	exon:41174041-41174127,exon:41189152-41189286	CON_1,HFD_2,HSD_2	3,3,2	79170193	Ube2r2	Ubiquitin-conjugating enzyme, active site||Ubiquitin-conjugating enzyme E2||Ubiquitin-conjugating enzyme/RWD-like	3	0	0	0	3	0	0	2	0	58.9484	0	0	0	50.5536	0	0	28.8717	0	0.53338	1.07332	-0.96216	0.79735	0.9996	FALSE	0.951542	1.10073	-0.20362	0.95294	0.99903	FALSE	0.978717	0.563036	0.75703	0.84429	0.99761	FALSE
novel_circ_0003176	13	59512323	59514295	-	1972	208	ENSMUSG00000021557;	exon:59514087-59514295	HFD_1	4	81	Agtpbp1	Cytosolic carboxypeptidase, N-terminal||Armadillo-like helical||Cytosolic aminopeptidase 1||Armadillo-type fold||-||Peptidase M14, carboxypeptidase A	0	0	0	4	0	0	0	0	0	0	0	0	56.3103	0	0	0	0	0	0	0	NA	NA	NA	NA	1.06822	0	2.5053	0.52931	0.98087	FALSE	1.11517	0	2.6058	0.51284	0.99144	FALSE
novel_circ_0016240	9	70367615	70370502	+	2887	114	ENSMUSG00000032220;	exon:70367616-70367730	HSD_1	2	21	Myo1e	Unconventional myosin-Ie/If, SH3 domain||Class I myosin tail homology domain||P-loop containing nucleoside triphosphate hydrolase||IQ motif, EF-hand binding site||Kinesin motor domain superfamily||SH3-like domain superfamily||SH3 domain||Myosin head, motor domain||-||Class I myosin, motor domain	0	0	0	0	0	0	2	0	0	0	0	0	0	0	0	37.3058	0	0	0.672692	0	1.8517	0.64596	0.98499	FALSE	0	0	NA	NA	NA	NA	0	0.728095	-2.0346	0.6136	0.99144	FALSE
mmu_circ_0000121	1	179086323	179094402	-	8079	282	ENSMUSG00000055067;	exon:179086324-179086434,exon:179092866-179092968,exon:179094335-179094402	CON_1,HFD_1,HFD_3	2,4,2	15,5,21	Smyd3	SET domain||Zinc finger, MYND-type||Tetratricopeptide-like helical domain superfamily||Histone-lysine N-methyltransferase Smyd3||-	2	0	0	4	0	2	0	0	0	39.2989	0	0	56.3103	0	37.8774	0	0	0	0	0.71555	-2.0323	0.61412	0.98499	FALSE	1.76617	0.733817	1.2914	0.66039	0.98087	FALSE	1.82844	0	3.3075	0.36166	0.99144	FALSE
novel_circ_0011561	4	86585327	86604289	-	18962	135	ENSMUSG00000038047;	exon:86585328-86585463	CON_2	2	15	Haus6	HAUS augmin-like complex subunit 6||HAUS augmin-like complex subunit 6, N-terminal	0	2	0	0	0	0	0	0	0	0	33.8805	0	0	0	0	0	0	0	0	0.615455	-1.8435	0.6488	0.98499	FALSE	0	0.633264	-1.9087	0.63725	0.98087	FALSE	0	0	NA	NA	NA	NA
novel_circ_0015069	8	41015387	41022594	-	7207	280	ENSMUSG00000045636;	exon:41015388-41015454,exon:41022380-41022594	CON_1,CON_2,CON_3,HFD_1,HFD_3,HSD_1,HSD_2,HSD_3	9,21,3,14,7,3,12,12	25,75,29,43,48,35,74,54	Mtus1	Microtubule-associated tumour suppressor 1||-	9	21	3	14	0	7	3	12	12	176.845	355.745	57.1832	197.086	0	132.571	55.9587	173.23	238.441	8.367	10.7073	-0.36341	0.6268	0.98499	FALSE	6.18158	11.0099	-0.8297	0.53563	0.98087	FALSE	6.39953	8.88794	-0.46849	0.70807	0.99614	FALSE
novel_circ_0016639	X	140736123	140738468	+	2345	148	ENSMUSG00000000266;	intron:140738320-140738468	CON_3,HSD_2	2,2	3,9	Mid2	COS domain||SPRY domain||Midline-1, COS domain||Concanavalin A-like lectin/glucanase domain superfamily||Fibronectin type III||B-box-type zinc finger||Fibronectin type III superfamily||Zinc finger, RING-type||Butyrophylin-like, SPRY domain||B-box, C-terminal||RING-type zinc-finger, LisH dimerisation motif||Zinc finger, RING/FYVE/PHD-type||B30.2/SPRY domain||TRIM1, PRY/SPRY domain||Immunoglobulin-…	0	0	2	0	0	0	0	2	0	0	0	38.1221	0	0	0	0	28.8717	0	0.53338	0.683342	-0.319	0.93541	0.9996	FALSE	0	0.705644	-2.0441	0.61248	0.98087	FALSE	0	0.563036	-1.7139	0.67182	0.99144	FALSE
novel_circ_0013323	6	35064897	35080226	-	15329	514	ENSMUSG00000038784;	exon:35064898-35065022,exon:35068588-35068713,exon:35079961-35080226	CON_1,CON_2,CON_3,HFD_1,HFD_3,HSD_1,HSD_2,HSD_3	12,8,19,10,20,17,18,19	7,9,11,8,9,5,10,7	Cnot4	Nucleotide-binding alpha-beta plait domain superfamily||RNA recognition motif domain||Zinc finger, CCCH-type||NOT4, modified RING finger, HC subclass (C4C4-type)||RNA-binding domain superfamily||RNA recognition motif domain, eukaryote||Zinc finger, RING/FYVE/PHD-type||Zinc finger, RING-type||CCR4-NOT transcription complex subunit 4||CNOT4, RNA recognition motif	12	8	19	10	0	20	17	18	19	235.793	135.522	362.16	140.776	0	378.774	317.099	259.845	377.531	17.1013	13.2469	0.37051	0.48439	0.98499	FALSE	9.65003	13.6396	-0.50319	0.70535	0.98087	FALSE	9.92063	18.2506	-0.88383	0.47813	0.99144	FALSE
mmu_circ_0000462	13	48932296	48934078	-	1782	226	ENSMUSG00000038014;	exon:48932297-48932393,exon:48933950-48934078	CON_1,CON_2,HFD_1,HFD_2,HFD_3,HSD_1,HSD_2,HSD_3	5,8,4,6,5,3,5,3	61,83,72,80,70,60,126,82	Fam120a	PIN-like domain superfamily||Constitutive coactivator of PPAR-gamma	5	8	0	4	6	5	3	5	3	98.2473	135.522	0	56.3103	101.107	94.6934	55.9587	72.1792	59.6101	3.38191	4.2507	-0.33128	0.78853	0.9996	FALSE	4.71617	4.3676	0.09446	0.93063	0.99903	FALSE	4.85578	3.60413	0.41559	0.6906	0.99264	FALSE
novel_circ_0015068	8	40606758	40626137	-	19379	402	ENSMUSG00000039431;	exon:40606759-40606921,exon:40608894-40609016,exon:40626019-40626137	HFD_1	3	8	Mtmr7	MTMR7, PH-GRAM domain||-||Protein-tyrosine phosphatase, catalytic||Myotubularin family||Myotubularin-like phosphatase domain||PH-like domain superfamily||Protein-tyrosine phosphatase-like||Protein-tyrosine phosphatase, active site||Tyrosine specific protein phosphatases domain||Myotubularin-related protein 7	0	0	0	3	0	0	0	0	0	0	0	0	42.2327	0	0	0	0	0	0	0	NA	NA	NA	NA	0.801163	0	2.0951	0.6011	0.98087	FALSE	0.836375	0	2.1951	0.58373	0.99144	FALSE
mmu_circ_0000464	13	55055974	55069807	-	13833	267	ENSMUSG00000025878;	exon:55055975-55056078,exon:55060266-55060342,exon:55069722-55069807	CON_1,CON_2,CON_3,HFD_1,HFD_2,HFD_3,HSD_1,HSD_2,HSD_3	17,21,11,18,8,24,17,18,18	12,27,9,28,21,28,23,38,28	Uimc1	RAP80, N-terminal||Ubiquitin interacting motif||BRCA1-A complex subunit RAP80||-	17	21	11	18	8	24	17	18	18	334.041	355.745	209.672	253.396	134.809	454.528	317.099	259.845	357.661	16.7548	16.3028	0.031379	0.94889	0.9996	FALSE	15.7198	16.7678	-0.10572	0.84212	0.99903	FALSE	16.1874	17.8825	-0.14765	0.77431	0.99761	FALSE
mmu_circ_0000465	13	55233894	55248077	+	14183	2869	ENSMUSG00000021488;	exon:55233895-55234030	CON_1,CON_2,CON_3,HFD_1,HFD_2,HFD_3,HSD_1,HSD_2,HSD_3	6,8,25,7,9,14,25,17,10	55,112,83,81,74,85,85,83,76	Nsd1	Zinc finger, PHD-type||Post-SET domain||Zinc finger, PHD-finger||Zinc finger, RING-type||Zinc finger, FYVE/PHD-type||AWS domain||Zinc finger, RING/FYVE/PHD-type||Zinc finger, PHD-type, conserved site||NSD, Cys-His rich domain||-||SET domain||PWWP domain	6	8	25	7	9	14	25	17	10	117.897	135.522	476.526	98.543	151.661	265.141	466.322	245.409	198.7	16.4071	13.1502	0.31919	0.66382	0.98499	FALSE	9.60965	13.5551	-0.51045	0.44501	0.98087	FALSE	9.88059	17.5683	-0.84469	0.15006	0.99144	FALSE
novel_circ_0016378	9	82926396	82933067	-	6671	221	ENSMUSG00000032253;	exon:82932846-82933067	CON_1,CON_2,CON_3,HFD_1,HSD_1,HSD_2,HSD_3	3,2,8,4,4,7,3	12,28,21,29,27,37,18	Phip	Bromodomain, conserved site||PH-interacting protein||-||Bromodomain||WD40-repeat-containing domain superfamily||WD40-repeat-containing domain||WD40 repeat||G-protein beta WD-40 repeat||Bromodomain-like superfamily||WD40 repeat, conserved site||WD40/YVTN repeat-like-containing domain superfamily	3	2	8	4	0	0	4	7	3	58.9484	33.8805	152.488	56.3103	0	0	74.6116	101.051	59.6101	4.25163	4.42215	-0.039903	0.97005	0.9996	FALSE	1.06822	4.55657	-2.0147	0.22138	0.98087	FALSE	1.11517	4.53121	-1.9578	0.22714	0.99144	FALSE
mmu_circ_0000467	13	56104301	56104995	-	694	305	ENSMUSG00000015937;	exon:56104302-56104499,exon:56104889-56104995	CON_2,HFD_1,HFD_3,HSD_2	3,4,3,5	165,98,95,223	H2afy	Histone-fold||Core histone macro-H2A, macro domain||Macro domain||Histone H2A||Histone H2A/H2B/H3||Core histone macro-H2A||Histone H2A, C-terminal domain	0	3	0	4	0	3	0	5	0	0	50.8208	0	56.3103	0	56.816	0	72.1792	0	1.33345	0.923183	0.53499	0.87294	0.9996	FALSE	2.11514	0.949895	1.1324	0.66854	0.98087	FALSE	2.18507	1.40759	0.59642	0.80234	0.99761	FALSE
mmu_circ_0000468	13	58859168	58861555	+	2387	576	ENSMUSG00000055254;	exon:58859169-58859305	HFD_2,HSD_2	2,3	20,44	Ntrk2	Immunoglobulin-like domain||Tyrosine-protein kinase receptor NTRK, C2-Ig-like domain||Serine-threonine/tyrosine-protein kinase, catalytic domain||Immunoglobulin subtype||Immunoglobulin-like fold||Tyrosine-protein kinase, neurotrophic receptor||Tyrosine-protein kinase, catalytic domain||Cysteine-rich flanking region, C-terminal||Tyrosine-protein kinase, active site||Protein kinase domain||Protein …	0	0	0	0	2	0	0	3	0	0	0	0	0	33.7024	0	0	43.3075	0	0.800071	0	2.1371	0.59397	0.98499	FALSE	0.634361	0	1.7334	0.66753	0.98087	FALSE	0.652478	0.844554	-0.40263	0.9171	0.99761	FALSE
mmu_circ_0000469	13	59525145	59544451	-	19306	695	ENSMUSG00000021557;	exon:59525146-59525239,exon:59536249-59536373,exon:59544387-59544451	CON_1,CON_2,CON_3,HFD_1,HFD_2,HSD_1,HSD_2,HSD_3	7,6,7,8,3,4,3,4	32,45,51,62,72,47,68,48	Agtpbp1	Cytosolic carboxypeptidase, N-terminal||Armadillo-like helical||Cytosolic aminopeptidase 1||Armadillo-type fold||-||Peptidase M14, carboxypeptidase A	7	6	7	8	3	0	4	3	4	137.546	101.642	133.427	112.621	50.5536	0	74.6116	43.3075	79.4802	3.53135	6.74249	-0.9451	0.30918	0.98499	FALSE	3.08798	6.93791	-1.1183	0.27153	0.98087	FALSE	3.20905	3.77327	-0.19562	0.8807	0.99761	FALSE
novel_circ_0016374	9	80217615	80228987	+	11372	129	ENSMUSG00000033577;	exon:80228858-80228987	CON_1,CON_2,CON_3,HFD_2,HFD_3	4,3,3,6,2	31,78,65,61,48	Myo6	Myosin S1 fragment, N-terminal||Myosin, N-terminal, SH3-like||Kinesin motor domain superfamily||Myosin VI, cargo binding domain||P-loop containing nucleoside triphosphate hydrolase||Class VI myosin, motor domain||Myosin head, motor domain	4	3	3	0	6	2	0	0	0	78.5978	50.8208	57.1832	0	101.107	37.8774	0	0	0	0	3.3793	-4.2824	0.079596	0.98499	FALSE	2.60103	3.476	-0.43263	0.76097	0.99354	FALSE	2.67071	0	3.8473	0.21774	0.99144	FALSE
novel_circ_0011415	4	57638009	57648120	+	10111	210	ENSMUSG00000089945;ENSMUSG00000090053;	exon:57638010-57638090,exon:57647990-57648120	CON_1,CON_2,HFD_2,HSD_2,HSD_3	3,2,6,3,2	10,14,14,20,8	Pakap;Palm2	-	3	2	0	0	6	0	0	3	2	58.9484	33.8805	0	0	101.107	0	0	43.3075	39.7401	1.49302	1.68878	-0.16595	0.94364	0.9996	FALSE	1.90308	1.73399	0.13236	0.95561	0.99903	FALSE	1.95743	1.58082	0.29497	0.90364	0.99761	FALSE
novel_circ_0016372	9	80132888	80142395	+	9507	242	ENSMUSG00000034252;	exon:80132889-80132981,exon:80142245-80142395	CON_1	2	23	Senp6	Ulp1 protease family, C-terminal catalytic domain||-||Papain-like cysteine peptidase superfamily	2	0	0	0	0	0	0	0	0	39.2989	0	0	0	0	0	0	0	0	0	0.71555	-2.0323	0.61412	0.98499	FALSE	0	0.733817	-2.0934	0.60355	0.98087	FALSE	0	0	NA	NA	NA	NA
novel_circ_0016373	9	80217615	80226265	+	8650	283	ENSMUSG00000033577;	exon:80217616-80217757,exon:80221018-80221087,exon:80226192-80226265	HFD_2	3	68	Myo6	Myosin S1 fragment, N-terminal||Myosin, N-terminal, SH3-like||Kinesin motor domain superfamily||Myosin VI, cargo binding domain||P-loop containing nucleoside triphosphate hydrolase||Class VI myosin, motor domain||Myosin head, motor domain	0	0	0	0	3	0	0	0	0	0	0	0	0	50.5536	0	0	0	0	0	0	NA	NA	NA	NA	0.951542	0	2.3196	0.5613	0.98087	FALSE	0.978717	0	2.4003	0.54776	0.99144	FALSE
novel_circ_0011410	4	57204906	57225900	-	20994	332	ENSMUSG00000038764;	exon:57204907-57205053,exon:57225714-57225900	CON_2	2	54	Ptpn3	-||Ubiquitin-like domain superfamily||FERM, C-terminal PH-like domain||FERM conserved site||Protein-tyrosine phosphatase, catalytic||Protein-tyrosine phosphatase-like||Band 4.1 domain||PTP type protein phosphatase||PH-like domain superfamily||FERM central domain||PTPN3/4, FERM domain C-lobe||Protein-tyrosine phosphatase, active site||PDZ superfamily||Ezrin/radixin/moesin-like||FERM, N-terminal||F…	0	2	0	0	0	0	0	0	0	0	33.8805	0	0	0	0	0	0	0	0	0.615455	-1.8435	0.6488	0.98499	FALSE	0	0.633264	-1.9087	0.63725	0.98087	FALSE	0	0	NA	NA	NA	NA
novel_circ_0007828	1	183395909	183397893	+	1984	282	ENSMUSG00000072258;	exon:183395910-183396079,exon:183397780-183397893	HFD_1,HFD_2,HFD_3,HSD_2,HSD_3	2,2,5,3,2	12,11,14,13,12	Taf1a	RNA polymerase I, subunit A (TATA-binding protein-associated factor)||TATA box-binding protein-associated factor RNA polymerase I subunit A-like	0	0	0	2	2	5	0	3	2	0	0	0	28.1551	33.7024	94.6934	0	43.3075	39.7401	1.49302	0	3.0174	0.41881	0.98499	FALSE	2.91334	0	3.9312	0.14578	0.98087	FALSE	2.99324	1.58082	0.8904	0.60302	0.99144	FALSE
novel_circ_0007530	1	155940716	155962560	-	21844	354	ENSMUSG00000033671;	exon:155940717-155940830,exon:155944099-155944212,exon:155961144-155961187,exon:155962475-155962560	CON_1,CON_2,CON_3,HFD_1,HFD_2,HSD_1,HSD_2,HSD_3	3,3,5,3,3,5,3,2	31,82,21,54,49,34,66,49	Cep350	CAP Gly-rich domain||Centrosome-associated protein 350||CAP Gly-rich domain superfamily	3	3	5	3	3	0	5	3	2	58.9484	50.8208	95.3053	42.2327	50.5536	0	93.2644	43.3075	39.7401	3.17475	3.70486	-0.22631	0.85185	0.9996	FALSE	1.7527	3.81473	-1.0964	0.45606	0.98087	FALSE	1.81509	3.40105	-0.88071	0.5723	0.99144	FALSE
novel_circ_0007825	1	183135354	183135876	-	522	521	ENSMUSG00000030768;	exon:183135355-183135876	HFD_2,HSD_2	6,5	6,5	Disp1	-||Protein patched/dispatched||Sterol-sensing domain	0	0	0	0	6	0	0	5	0	0	0	0	0	101.107	0	0	72.1792	0	1.33345	0	2.8653	0.47032	0.98499	FALSE	1.90308	0	3.3208	0.38921	0.98087	FALSE	1.95743	1.40759	0.45849	0.90485	0.99761	FALSE
novel_circ_0007826	1	183173495	183203039	-	29544	309	ENSMUSG00000030768;	exon:183173496-183173623,exon:183175567-183175662,exon:183202952-183203039	CON_2,CON_3,HFD_3,HSD_2	4,2,9,4	4,3,5,4	Disp1	-||Protein patched/dispatched||Sterol-sensing domain	0	4	2	0	0	9	0	4	0	0	67.761	38.1221	0	0	170.448	0	57.7434	0	1.06676	1.91425	-0.81368	0.76076	0.99829	FALSE	3.14077	1.97217	0.65631	0.81773	0.99903	FALSE	3.20972	1.12607	1.4867	0.69818	0.99614	FALSE
novel_circ_0007535	1	156059410	156065296	+	5886	176	ENSMUSG00000050565;	exon:156059411-156059587	HFD_2,HSD_1,HSD_2	2,3,4	44,39,54	Tor1aip2	-||Lamina-associated polypeptide 1C||LAP1C-like, C-terminal domain superfamily	0	0	0	0	2	0	3	4	0	0	0	0	0	33.7024	0	55.9587	57.7434	0	2.0758	0	3.4932	0.30391	0.98499	FALSE	0.634361	0	1.7334	0.66753	0.98087	FALSE	0.652478	2.21821	-1.7786	0.5214	0.99144	FALSE
novel_circ_0003942	14	64779313	64789698	+	10385	362	ENSMUSG00000060012;	exon:64779314-64779466,exon:64779691-64779768,exon:64789565-64789698	CON_3,HFD_2,HSD_1	3,3,3	36,63,41	Kif13b	Kinesin-like||Kinesin-like protein||Kinesin-associated||Kinesin-like protein KIF13B||Forkhead-associated (FHA) domain||CAP Gly-rich domain superfamily||Kinesin-like KIF1-type||Kinesin-like protein KIF13A||Kinesin motor domain, conserved site||P-loop containing nucleoside triphosphate hydrolase||Kinesin motor domain superfamily||SMAD/FHA domain superfamily||Kinesin motor domain||CAP Gly-rich domain	0	0	3	0	3	0	3	0	0	0	0	57.1832	0	50.5536	0	55.9587	0	0	1.00904	1.02501	-0.029714	0.9932	0.9996	FALSE	0.951542	1.05847	-0.15351	0.96472	0.99903	FALSE	0.978717	1.09214	-0.14933	0.96627	0.99761	FALSE
novel_circ_0010239	3	35826944	35839214	+	12270	153	ENSMUSG00000037400;	exon:35826945-35827098	HFD_3	3	41	Atp11b	P-type ATPase, cytoplasmic domain N||P-type ATPase, N-terminal||P-type ATPase, transmembrane domain superfamily||P-type ATPase, subfamily IV||HAD-like superfamily||P-type ATPase||HAD superfamily||P-type ATPase, C-terminal||P-type ATPase, phosphorylation site||Probable phospholipid-transporting ATPase IF||-||P-type ATPase, A domain superfamily	0	0	0	0	0	3	0	0	0	0	0	0	0	0	56.816	0	0	0	0	0	NA	NA	NA	NA	1.04692	0	2.4455	0.53951	0.98087	FALSE	1.06991	0	2.5177	0.52767	0.99144	FALSE
novel_circ_0010238	3	35809356	35839214	+	29858	165	ENSMUSG00000037400;	exon:35839049-35839214	CON_2	3	40	Atp11b	P-type ATPase, cytoplasmic domain N||P-type ATPase, N-terminal||P-type ATPase, transmembrane domain superfamily||P-type ATPase, subfamily IV||HAD-like superfamily||P-type ATPase||HAD superfamily||P-type ATPase, C-terminal||P-type ATPase, phosphorylation site||Probable phospholipid-transporting ATPase IF||-||P-type ATPase, A domain superfamily	0	3	0	0	0	0	0	0	0	0	50.8208	0	0	0	0	0	0	0	0	0.923183	-2.4234	0.54478	0.98499	FALSE	0	0.949895	-2.4887	0.534	0.98087	FALSE	0	0	NA	NA	NA	NA
novel_circ_0015457	9	100880775	100891136	+	10361	307	ENSMUSG00000037286;	exon:100880776-100880893,exon:100887380-100887483,exon:100891049-100891136	CON_1,HFD_1,HSD_3	2,3,2	20,26,30	Stag1	STAG||Stromalin conservative domain||-||Armadillo-type fold||Cohesin subunit Scc3/SA	2	0	0	3	0	0	0	0	2	39.2989	0	0	42.2327	0	0	0	0	39.7401	0.692946	0.71555	-0.051633	0.98931	0.9996	FALSE	0.801163	0.733817	0.16328	0.9649	0.99903	FALSE	0.836375	0.736264	0.22132	0.95394	0.99761	FALSE
novel_circ_0010234	3	35778024	35789661	+	11637	338	ENSMUSG00000037400;	exon:35788087-35788194,exon:35788426-35788554,exon:35789558-35789661	CON_1,CON_3,HFD_2,HFD_3,HSD_1,HSD_2,HSD_3	3,2,2,4,2,2,3	3,10,14,7,6,27,11	Atp11b	P-type ATPase, cytoplasmic domain N||P-type ATPase, N-terminal||P-type ATPase, transmembrane domain superfamily||P-type ATPase, subfamily IV||HAD-like superfamily||P-type ATPase||HAD superfamily||P-type ATPase, C-terminal||P-type ATPase, phosphorylation site||Probable phospholipid-transporting ATPase IF||-||P-type ATPase, A domain superfamily	3	0	2	0	2	4	2	2	3	58.9484	0	38.1221	0	33.7024	75.7547	37.3058	28.8717	59.6101	2.24549	1.75667	0.36317	0.84517	0.9996	FALSE	2.03026	1.80637	0.16096	0.93857	0.99903	FALSE	2.07902	2.39553	-0.22285	0.89813	0.99761	FALSE
novel_circ_0010237	3	35809356	35820112	+	10756	239	ENSMUSG00000037400;	exon:35809357-35809596	CON_3,HFD_2	2,5	35,44	Atp11b	P-type ATPase, cytoplasmic domain N||P-type ATPase, N-terminal||P-type ATPase, transmembrane domain superfamily||P-type ATPase, subfamily IV||HAD-like superfamily||P-type ATPase||HAD superfamily||P-type ATPase, C-terminal||P-type ATPase, phosphorylation site||Probable phospholipid-transporting ATPase IF||-||P-type ATPase, A domain superfamily	0	0	2	0	5	0	0	0	0	0	0	38.1221	0	84.2559	0	0	0	0	0	0.683342	-1.9743	0.6247	0.98499	FALSE	1.5859	0.705644	1.1715	0.72657	0.987	FALSE	1.63119	0	3.1382	0.42794	0.99144	FALSE
novel_circ_0007400	1	135271528	135277537	-	6009	148	ENSMUSG00000041926;	exon:135277389-135277537	CON_2,HFD_1,HSD_1	5,2,6	38,14,10	Rnpep	Peptidase M1 LTA-4 hydrolase/aminopeptidase, C-terminal domain superfamily||Aminopeptidase N-like , N-terminal||Peptidase M1, alanine aminopeptidase/leukotriene A4 hydrolase||Peptidase M1, aminopeptidase B||Peptidase M1, leukotriene A4 hydrolase/aminopeptidase C-terminal||Armadillo-type fold||Peptidase M4/M1, CTD superfamily||Peptidase M1, membrane alanine aminopeptidase||Aminopeptidase, leukotri…	0	5	0	2	0	0	6	0	0	0	84.7013	0	28.1551	0	0	111.917	0	0	2.01808	1.53864	0.37985	0.92096	0.9996	FALSE	0.534108	1.58316	-1.539	0.65393	0.98087	FALSE	0.557583	2.18428	-1.9214	0.54235	0.99144	FALSE
novel_circ_0010232	3	32894763	32919070	+	24307	125	ENSMUSG00000056900;	exon:32894764-32894889	HFD_1,HSD_2	2,2	3,3	Usp13	-||Peptidase C19, ubiquitin carboxyl-terminal hydrolase||Ubiquitin specific protease domain||Ubiquitinyl hydrolase||Ubiquitin-associated domain||Ubiquitin specific protease, conserved site||UBA-like superfamily||Zinc finger, RING/FYVE/PHD-type||Papain-like cysteine peptidase superfamily||Zinc finger, UBP-type||Ubiquitinyl hydrolase, variant UBP zinc finger	0	0	0	2	0	0	0	2	0	0	0	0	28.1551	0	0	0	28.8717	0	0.53338	0	1.5621	0.70028	0.98499	FALSE	0.534108	0	1.5189	0.70802	0.98087	FALSE	0.557583	0.563036	-0.022898	0.99545	0.99761	FALSE
novel_circ_0006386	18	5705042	5761433	+	56391	305	ENSMUSG00000024238;	exon:5705043-5705243,exon:5761328-5761433	CON_2,CON_3,HFD_1,HFD_2,HFD_3,HSD_2,HSD_3	5,7,4,4,2,3,5	1.23137e+20	Zeb1	Zinc finger C2H2-type||Homeobox-like domain superfamily||Zinc finger C2H2 superfamily||-||Homeobox domain||Drought induced 19 protein type, zinc-binding domain	0	5	7	4	4	2	0	3	5	0	84.7013	133.427	56.3103	67.4047	37.8774	0	43.3075	99.3502	2.53244	3.93034	-0.64387	0.66996	0.98499	FALSE	3.03489	4.05291	-0.41863	0.74303	0.99197	FALSE	3.13339	2.68521	0.22965	0.87463	0.99761	FALSE
novel_circ_0006387	18	5748693	5761433	+	12740	266	ENSMUSG00000024238;	exon:5748694-5748855,exon:5761328-5761433	CON_2,HFD_1	2,5	48,49	Zeb1	Zinc finger C2H2-type||Homeobox-like domain superfamily||Zinc finger C2H2 superfamily||-||Homeobox domain||Drought induced 19 protein type, zinc-binding domain	0	2	0	5	0	0	0	0	0	0	33.8805	0	70.3878	0	0	0	0	0	0	0.615455	-1.8435	0.6488	0.98499	FALSE	1.33527	0.633264	1.0722	0.75941	0.99354	FALSE	1.39396	0	2.925	0.46093	0.99144	FALSE
mmu_circ_0001755	9	22643744	22679064	+	35320	771	ENSMUSG00000035919;	exon:22643745-22643847,exon:22645964-22646068,exon:22678912-22679064	CON_1,CON_2,CON_3,HFD_1,HFD_2,HFD_3,HSD_1,HSD_2,HSD_3	21,35,38,21,31,37,38,41,12	3,6,15,9,10,6,7,9,19	Bbs9	PTHB1, C-terminal domain||Parathyroid hormone-responsive B1||-||PTHB1, N-terminal domain	21	35	38	21	31	37	38	41	12	412.639	592.909	724.32	295.629	522.387	700.731	708.81	591.87	238.441	27.8731	31.2672	-0.16063	0.70353	0.98713	FALSE	28.3528	32.1944	-0.19993	0.61454	0.98087	FALSE	29.1635	29.7936	-0.040881	0.94153	0.99761	FALSE
mmu_circ_0001754	9	22490817	22514093	+	23276	453	ENSMUSG00000035919;	exon:22490818-22490940,exon:22496709-22496859,exon:22504045-22504109,exon:22513980-22514093	CON_1,CON_2,CON_3,HFD_1,HFD_2,HFD_3,HSD_1,HSD_2,HSD_3	11,4,11,6,4,6,3,9,13	2,8,4,11,7,5,13,15,4	Bbs9	PTHB1, C-terminal domain||Parathyroid hormone-responsive B1||-||PTHB1, N-terminal domain	11	4	11	6	4	6	3	9	13	216.144	67.761	209.672	84.4654	67.4047	113.632	55.9587	129.923	258.311	7.9134	8.92481	-0.16928	0.82311	0.9996	FALSE	4.96489	9.18356	-0.88305	0.26225	0.98087	FALSE	5.11752	8.41152	-0.71731	0.38498	0.99144	FALSE
mmu_circ_0001757	9	22887580	22887996	+	416	243	ENSMUSG00000035919;	exon:22887581-22887688,exon:22887862-22887996	CON_1,CON_2,CON_3,HFD_1,HFD_2,HFD_3,HSD_1,HSD_2,HSD_3	7,24,8,10,7,19,19,24,28	3,12,10,7,0,14,4,18,9	Bbs9	PTHB1, C-terminal domain||Parathyroid hormone-responsive B1||-||PTHB1, N-terminal domain	7	24	8	10	7	19	19	24	28	137.546	406.566	152.488	140.776	117.958	359.835	354.405	346.46	556.361	22.4924	12.6233	0.81167	0.12138	0.98499	FALSE	11.5213	12.9901	-0.20189	0.75232	0.99316	FALSE	11.8477	23.981	-1.0329	0.045583	0.99144	TRUE
mmu_circ_0001751	9	21569454	21575518	+	6064	338	ENSMUSG00000032185;	exon:21569455-21569580,exon:21574487-21574593,exon:21575414-21575518	CON_1,CON_2,CON_3,HFD_1,HFD_2,HFD_3,HSD_1,HSD_2,HSD_3	7,16,9,12,9,10,15,8,7	15,42,29,20,37,16,27,41,30	Carm1	Protein arginine N-methyltransferase||PH-like domain superfamily||-||S-adenosyl-L-methionine-dependent methyltransferase||Histone-arginine methyltransferase CARM1, N-terminal	7	16	9	12	9	10	15	8	7	137.546	271.044	171.549	168.931	151.661	189.387	279.793	115.487	139.09	9.60402	10.5031	-0.14787	0.82138	0.9996	FALSE	9.54902	10.8099	-0.18935	0.76047	0.99354	FALSE	9.84801	10.2898	-0.050709	0.93725	0.99761	FALSE
mmu_circ_0001750	9	21387699	21388753	+	1054	367	ENSMUSG00000032178;	exon:21387700-21387797,exon:21388112-21388150,exon:21388524-21388753	CON_1,CON_2,HFD_1,HFD_2,HFD_3,HSD_1,HSD_2	4,3,4,7,4,2,4	44,113,46,66,64,52,114	Ilf3	Double-stranded RNA-binding domain||-||DZF domain||Interleukin enhancer-binding factor 3	4	3	0	4	7	4	2	4	0	78.5978	50.8208	0	56.3103	117.958	75.7547	37.3058	57.7434	0	1.73945	2.35428	-0.41547	0.8336	0.9996	FALSE	4.68438	2.41753	0.95265	0.45066	0.98087	FALSE	4.82538	1.85417	1.3389	0.31696	0.99144	FALSE
novel_circ_0007407	1	136292879	136304456	-	11577	139	ENSMUSG00000041570;	exon:136292880-136293019	CON_2,CON_3,HFD_1,HFD_3,HSD_2	3,4,5,6,5	25,32,14,20,25	Camsap2	CAMSAP, spectrin and Ca2+/calmodulin-binding region||Calponin homology domain||PRC-barrel-like superfamily||CH domain superfamily||Calmodulin-regulated spectrin-associated protein||Calmodulin-regulated spectrin-associated protein, CH domain||CKK domain superfamily||CKK domain	0	3	4	5	0	6	0	5	0	0	50.8208	76.2442	70.3878	0	113.632	0	72.1792	0	1.33345	2.28987	-0.74557	0.75117	0.9963	FALSE	3.42912	2.36118	0.52722	0.73915	0.98958	FALSE	3.53377	1.40759	1.2906	0.60572	0.99144	FALSE
novel_circ_0008362	1	89743727	89766464	+	22737	326	ENSMUSG00000055013;	exon:89743728-89743896,exon:89766306-89766464	HFD_2,HSD_1	2,5	30,50	Agap1	Ankyrin repeat||Small GTPase superfamily, Ras-type||PH-like domain superfamily||Ankyrin repeat-containing domain superfamily||ArfGAP domain superfamily||Arf GTPase activating protein||ARFGAP/RecO-like zinc finger||Pleckstrin homology domain||Small GTPase||Ankyrin repeat-containing domain||P-loop containing nucleoside triphosphate hydrolase	0	0	0	0	2	0	5	0	0	0	0	0	0	33.7024	0	93.2644	0	0	1.68173	0	3.1802	0.42154	0.98499	FALSE	0.634361	0	1.7334	0.66753	0.98087	FALSE	0.652478	1.82024	-1.4766	0.65457	0.99144	FALSE
novel_circ_0008363	1	89766305	89789324	+	23019	319	ENSMUSG00000055013;	exon:89766306-89766464,exon:89789163-89789324	CON_1,HFD_2,HFD_3,HSD_1	5,3,3,2	14,40,30,26	Agap1	Ankyrin repeat||Small GTPase superfamily, Ras-type||PH-like domain superfamily||Ankyrin repeat-containing domain superfamily||ArfGAP domain superfamily||Arf GTPase activating protein||ARFGAP/RecO-like zinc finger||Pleckstrin homology domain||Small GTPase||Ankyrin repeat-containing domain||P-loop containing nucleoside triphosphate hydrolase	5	0	0	0	3	3	2	0	0	98.2473	0	0	0	50.5536	56.816	37.3058	0	0	0.672692	1.78887	-1.42	0.66373	0.98499	FALSE	1.99847	1.83454	0.12337	0.95692	0.99903	FALSE	2.04862	0.728095	1.5099	0.59377	0.99144	FALSE
novel_circ_0008361	1	89725960	89743896	+	17936	272	ENSMUSG00000055013;	exon:89725961-89726065,exon:89743728-89743896	CON_1,CON_3,HFD_3,HSD_1,HSD_2,HSD_3	4,3,3,3,3,2	18,35,40,43,48,38	Agap1	Ankyrin repeat||Small GTPase superfamily, Ras-type||PH-like domain superfamily||Ankyrin repeat-containing domain superfamily||ArfGAP domain superfamily||Arf GTPase activating protein||ARFGAP/RecO-like zinc finger||Pleckstrin homology domain||Small GTPase||Ankyrin repeat-containing domain||P-loop containing nucleoside triphosphate hydrolase	4	0	3	0	0	3	3	3	2	78.5978	0	57.1832	0	0	56.816	55.9587	43.3075	39.7401	2.50205	2.45611	0.040823	0.97988	0.9996	FALSE	1.04692	2.5261	-1.3006	0.58819	0.98087	FALSE	1.06991	2.67296	-1.363	0.52264	0.99144	FALSE
novel_circ_0008366	1	91093559	91112297	+	18738	389	ENSMUSG00000026305;	exon:91100581-91100612,exon:91101185-91101310,exon:91107298-91107390,exon:91112156-91112297	CON_3,HFD_2	2,5	28,53	Lrrfip1	Leucine-rich repeat flightless-interacting protein 1/2	0	0	2	0	5	0	0	0	0	0	0	38.1221	0	84.2559	0	0	0	0	0	0.683342	-1.9743	0.6247	0.98499	FALSE	1.5859	0.705644	1.1715	0.72657	0.987	FALSE	1.63119	0	3.1382	0.42794	0.99144	FALSE
novel_circ_0015450	9	100776755	100796855	+	20100	431	ENSMUSG00000037286;	exon:100776756-100776832,exon:100786492-100786696,exon:100796704-100796855	CON_1,CON_2,HSD_1,HSD_2	2,2,4,2	55,77,68,39	Stag1	STAG||Stromalin conservative domain||-||Armadillo-type fold||Cohesin subunit Scc3/SA	2	2	0	0	0	0	4	2	0	39.2989	33.8805	0	0	0	0	74.6116	28.8717	0	1.87876	1.33101	0.49621	0.83252	0.9996	FALSE	0	1.36708	-3.0028	0.42001	0.98087	FALSE	0	2.01923	-3.5194	0.31631	0.99144	FALSE
novel_circ_0008364	1	89834433	89843243	+	8810	466	ENSMUSG00000055013;	exon:89834434-89834588,exon:89837712-89837802,exon:89843021-89843243	CON_1,CON_2,CON_3,HFD_1,HFD_2,HFD_3,HSD_1,HSD_2,HSD_3	6,6,6,8,9,8,10,15,6	14,37,20,15,45,32,15,45,46	Agap1	Ankyrin repeat||Small GTPase superfamily, Ras-type||PH-like domain superfamily||Ankyrin repeat-containing domain superfamily||ArfGAP domain superfamily||Arf GTPase activating protein||ARFGAP/RecO-like zinc finger||Pleckstrin homology domain||Small GTPase||Ankyrin repeat-containing domain||P-loop containing nucleoside triphosphate hydrolase	6	6	6	8	9	8	10	15	6	117.897	101.642	114.366	112.621	151.661	151.509	186.529	216.538	119.22	9.44265	6.04304	0.656	0.36778	0.98499	FALSE	7.78286	6.21817	0.3203	0.66788	0.98087	FALSE	8.01957	10.072	-0.3449	0.60489	0.99144	FALSE
novel_circ_0008365	1	91084945	91105297	+	20352	462	ENSMUSG00000026305;	exon:91084946-91085005,exon:91093560-91093637,exon:91100581-91100612,exon:91101185-91101310,exon:91105127-91105297	CON_1,CON_2,HFD_1,HFD_2,HSD_1,HSD_2	5,4,13,6,3,9	42,62,61,90,47,72	Lrrfip1	Leucine-rich repeat flightless-interacting protein 1/2	5	4	0	13	6	0	3	9	0	98.2473	67.761	0	183.008	101.107	0	55.9587	129.923	0	3.40925	3.01978	0.19879	0.89576	0.9996	FALSE	5.37479	3.10107	0.80352	0.65076	0.98087	FALSE	5.58172	3.6258	0.61555	0.73875	0.99761	FALSE
novel_circ_0014899	8	125924017	125927706	+	3689	503	ENSMUSG00000031853;	exon:125924018-125924198,exon:125926075-125926223,exon:125927531-125927706	CON_1,CON_2,CON_3,HFD_1,HFD_2,HFD_3,HSD_1,HSD_2,HSD_3	6,4,9,15,7,12,27,3,5	12,11,5,7,11,15,16,9,12	Map3k21	Protein kinase-like domain superfamily||Serine/threonine-protein kinase, active site||Serine-threonine/tyrosine-protein kinase, catalytic domain||Mitogen-activated protein (MAP) kinase kinase kinase, MLK1-4||SH3-like domain superfamily||Protein kinase domain||SH3 domain||Protein kinase, ATP binding site	6	4	9	15	7	12	27	3	5	117.897	67.761	171.549	211.164	117.958	227.264	503.628	43.3075	99.3502	11.6138	6.4526	0.8436	0.42564	0.98499	FALSE	10.4138	6.64338	0.65811	0.34887	0.98087	FALSE	10.7452	12.5145	-0.20928	0.83591	0.99761	FALSE
novel_circ_0008368	1	91100576	91112297	+	11721	634	ENSMUSG00000026305;	exon:91100577-91100612,exon:91101185-91101310,exon:91103247-91103318,exon:91105127-91105297,exon:91107298-91107390,exon:91112156-91112297	CON_2,CON_3,HFD_1,HFD_2,HFD_3,HSD_1,HSD_2,HSD_3	14,8,16,23,8,10,22,17	114,73,77,105,83,62,153,104	Lrrfip1	Leucine-rich repeat flightless-interacting protein 1/2	0	14	8	16	23	8	10	22	17	0	237.164	152.488	225.241	387.577	151.509	186.529	317.589	337.791	15.1207	7.04156	1.0931	0.3018	0.98499	FALSE	14.3598	7.25542	0.97671	0.38857	0.98087	FALSE	14.8172	16.0921	-0.12096	0.82061	0.99761	FALSE
novel_circ_0008369	1	91105126	91112297	+	7171	403	ENSMUSG00000026305;	exon:91105127-91105297,exon:91110355-91110447,exon:91112156-91112297	CON_2,HFD_1,HFD_2,HFD_3,HSD_1,HSD_2,HSD_3	5,10,6,2,6,21,6	87,75,125,82,72,134,92	Lrrfip1	Leucine-rich repeat flightless-interacting protein 1/2	0	5	0	10	6	2	6	21	6	0	84.7013	0	140.776	101.107	37.8774	111.917	303.153	119.22	9.69741	1.53864	2.6187	0.065923	0.98499	FALSE	5.27157	1.58316	1.701	0.23877	0.98087	FALSE	5.45862	10.305	-0.91424	0.24288	0.99144	FALSE
novel_circ_0006383	18	56899974	56906865	-	6891	325	ENSMUSG00000032656;	intron:56899975-56899997,intron:56904439-56904600,intron:56906723-56906865	CON_1	4	0	2023-03-03	Zinc finger, RING-CH-type||Zinc finger, RING/FYVE/PHD-type	4	0	0	0	0	0	0	0	0	78.5978	0	0	0	0	0	0	0	0	0	1.4311	-3.0378	0.44404	0.98499	FALSE	0	1.46763	-3.0986	0.435	0.98087	FALSE	0	0	NA	NA	NA	NA
novel_circ_0015779	9	22376136	22376522	-	386	385	ENSMUSG00000036777;	exon:22376137-22376522	CON_3,HFD_2,HSD_3	3,7,5	6,15,10	Anln	Anillin, N-terminal domain||Anillin, PH domain||Pleckstrin homology domain||Anillin homology domain||PH-like domain superfamily	0	0	3	0	7	0	0	0	5	0	0	57.1832	0	117.958	0	0	0	99.3502	1.73237	1.02501	0.75225	0.84569	0.9996	FALSE	2.22026	1.05847	1.0703	0.78118	0.99903	FALSE	2.28367	1.84066	0.31687	0.9338	0.99761	FALSE
novel_circ_0015778	9	22360409	22364100	-	3691	257	ENSMUSG00000036777;	exon:22360410-22360557,exon:22363990-22364100	CON_1,CON_2,CON_3,HSD_2,HSD_3	4,5,7,9,2	9,13,7,25,28	Anln	Anillin, N-terminal domain||Anillin, PH domain||Pleckstrin homology domain||Anillin homology domain||PH-like domain superfamily	4	5	7	0	0	0	0	9	2	78.5978	84.7013	133.427	0	0	0	0	129.923	39.7401	3.09316	5.36144	-0.751	0.52101	0.98499	FALSE	0	5.52055	-5.0155	0.0062316	0.98087	TRUE	0	3.26992	-4.2258	0.13062	0.99144	FALSE
novel_circ_0015776	9	22283167	22290642	-	7475	321	ENSMUSG00000066829;	exon:22283168-22283260,exon:22284017-22284143,exon:22290539-22290642	HFD_2,HFD_3,HSD_1,HSD_2	2,2,3,2	17,12,11,23	Zfp810	KRAB domain superfamily||Zinc finger C2H2 superfamily||Krueppel-associated box||Zinc finger C2H2-type	0	0	0	0	2	2	3	2	0	0	0	0	0	33.7024	37.8774	55.9587	28.8717	0	1.54242	0	3.0617	0.40912	0.98499	FALSE	1.33231	0	2.7999	0.4544	0.98087	FALSE	1.36575	1.65518	-0.29437	0.90457	0.99761	FALSE
novel_circ_0015775	9	22235019	22236294	+	1275	392	ENSMUSG00000057982;	exon:22235020-22235146,exon:22236028-22236294	HFD_2	4	24	Zfp809	-||KRAB domain superfamily||Krueppel-associated box||Zinc finger C2H2-type||Zinc finger C2H2 superfamily	0	0	0	0	4	0	0	0	0	0	0	0	0	67.4047	0	0	0	0	0	0	NA	NA	NA	NA	1.26872	0	2.7352	0.49101	0.98087	FALSE	1.30496	0	2.8159	0.47832	0.99144	FALSE
novel_circ_0016494	9	99088604	99101400	-	12796	302	ENSMUSG00000032462;	exon:99088605-99088682,exon:99101175-99101400	CON_1,HFD_1,HSD_1	4,3,4	5,13,6	Pik3cb	Phosphatidylinositol 3-kinase adaptor-binding (PI3K ABD) domain||Phosphatidylinositol 3-kinase, Vps34 type||Phosphatidylinositol 3-kinase Ras-binding (PI3K RBD) domain||C2 domain superfamily||Phosphatidylinositol 3-/4-kinase, catalytic domain superfamily||Phosphatidylinositol kinase||Phosphatidylinositol 3/4-kinase, conserved site||Phosphatidylinositol 3-/4-kinase, catalytic domain||Protein kinas…	4	0	0	3	0	0	4	0	0	78.5978	0	0	42.2327	0	0	74.6116	0	0	1.34538	1.4311	-0.088895	0.9816	0.9996	FALSE	0.801163	1.46763	-0.83693	0.80203	0.99903	FALSE	0.836375	1.45619	-0.76512	0.82124	0.99761	FALSE
novel_circ_0015773	9	22012678	22013166	+	488	323	ENSMUSG00000003402;	exon:22012679-22012753,exon:22012836-22012935,exon:22013016-22013166	CON_1,CON_2,CON_3,HFD_1,HFD_2,HFD_3,HSD_1,HSD_2,HSD_3	32,30,19,26,14,14,11,19,5	71,196,113,84,98,96,99,116,107	Prkcsh	EF-hand domain pair||Mannose-6-phosphate receptor binding domain superfamily||Glucosidase II beta subunit, N-terminal||Glucosidase II beta subunit-like||LDL receptor-like superfamily||EF-hand domain||Glucosidase 2 subunit beta||EF-Hand 1, calcium-binding site||Glucosidase 2 subunit beta-like	32	30	19	26	14	14	11	19	5	628.783	508.208	362.16	366.017	235.917	265.141	205.182	274.281	99.3502	10.4993	27.1724	-1.3466	0.0072508	0.98499	TRUE	16.2696	27.9436	-0.76859	0.077512	0.98087	FALSE	16.8088	11.194	0.57332	0.30534	0.99144	FALSE
novel_circ_0015772	9	21929092	21929534	+	442	359	ENSMUSG00000006241;	exon:21929093-21929226,exon:21929308-21929534	CON_1,HFD_2,HSD_1	4,4,2	4,4,2	Ccdc159	Coiled-coil domain-containing protein 159/163||-	4	0	0	0	4	0	2	0	0	78.5978	0	0	0	67.4047	0	37.3058	0	0	0.672692	1.4311	-1.0957	0.75166	0.9963	FALSE	1.26872	1.46763	-0.20408	0.94754	0.99903	FALSE	1.30496	0.728095	0.85644	0.81034	0.99761	FALSE
novel_circ_0015771	9	21824396	21825875	-	1479	327	ENSMUSG00000032198;	exon:21824397-21824537,exon:21825435-21825530,exon:21825783-21825875	CON_1,CON_3,HFD_1,HFD_2,HFD_3,HSD_2,HSD_3	4,5,7,10,4,4,7	5,3,5,7,6,10,8	Dock6	DHR-1 domain||Dedicator of cytokinesis, C-terminal||Dedicator of cytokinesis||DHR-2 domain||C2 domain superfamily||-||Dedicator of cytokinesis C/D, N-terminal||Dedicator of cytokinesis C, C2 domain	4	0	5	7	10	4	0	4	7	78.5978	0	95.3053	98.543	168.512	75.7547	0	57.7434	139.09	3.49207	3.13945	0.16065	0.91441	0.9996	FALSE	6.43708	3.23174	1.0169	0.33439	0.98087	FALSE	6.64047	3.70299	0.84952	0.41129	0.99144	FALSE
novel_circ_0015770	9	21779700	21780703	-	1003	469	ENSMUSG00000032194;	exon:21779701-21779937,exon:21780379-21780469,exon:21780560-21780703	CON_1,CON_2,CON_3,HFD_2,HSD_2	2,3,3,4,5	42,118,41,70,104	Kank2	Ankyrin repeat||Kank N-terminal motif||-||Ankyrin repeat-containing domain superfamily||Ankyrin repeat-containing domain	2	3	3	0	4	0	0	5	0	39.2989	50.8208	57.1832	0	67.4047	0	0	72.1792	0	1.33345	2.66375	-0.94819	0.63677	0.98499	FALSE	1.26872	2.74218	-1.1205	0.57622	0.98087	FALSE	1.30496	1.40759	-0.1364	0.96514	0.99761	FALSE
novel_circ_0014895	8	125480153	125482181	-	2028	321	ENSMUSG00000001995;	exon:125480154-125480342,exon:125482048-125482181	HSD_3	2	16	Sipa1l2	PDZ domain||Rap/Ran-GAP superfamily||Signal-induced proliferation-associated 1-like protein, C-terminal||Signal-induced proliferation-associated 1-like protein 2||PDZ superfamily||Rap GTPase activating protein domain	0	0	0	0	0	0	0	0	2	0	0	0	0	0	0	0	0	39.7401	0.692946	0	1.8892	0.63904	0.98499	FALSE	0	0	NA	NA	NA	NA	0	0.736264	-2.0487	0.61104	0.99144	FALSE
mmu_circ_0000808	17	69207858	69210383	+	2525	416	ENSMUSG00000024044;	exon:69207859-69208076,exon:69210186-69210383	CON_1,CON_2,CON_3,HFD_1,HFD_2,HFD_3,HSD_2,HSD_3	6,14,7,12,3,3,8,9	19,45,33,20,31,28,36,36	Epb41l3	PH-like domain superfamily||Band 4.1 domain||FERM central domain||Ubiquitin-like domain superfamily||-||FERM, C-terminal PH-like domain||FERM conserved site||FERM superfamily, second domain||FERM domain||Band 4.1-like protein 3||Band 4.1, C-terminal||FERM/acyl-CoA-binding protein superfamily||Ezrin/radixin/moesin-like||FERM adjacent (FA)||SAB domain||FERM, N-terminal	6	14	7	12	3	3	0	8	9	117.897	237.164	133.427	168.931	50.5536	56.816	0	115.487	178.83	5.25178	8.84653	-0.7548	0.38815	0.98499	FALSE	5.20312	9.10405	-0.78374	0.32422	0.98087	FALSE	5.39412	5.56533	-0.031773	0.97558	0.99761	FALSE
novel_circ_0014894	8	125468174	125473601	-	5427	103	ENSMUSG00000001995;	exon:125473498-125473601	CON_2,HFD_1,HSD_1	2,5,6	31,28,26	Sipa1l2	PDZ domain||Rap/Ran-GAP superfamily||Signal-induced proliferation-associated 1-like protein, C-terminal||Signal-induced proliferation-associated 1-like protein 2||PDZ superfamily||Rap GTPase activating protein domain	0	2	0	5	0	0	6	0	0	0	33.8805	0	70.3878	0	0	111.917	0	0	2.01808	0.615455	1.6822	0.59712	0.98499	FALSE	1.33527	0.633264	1.0722	0.75941	0.99354	FALSE	1.39396	2.18428	-0.63094	0.86917	0.99761	FALSE
mmu_circ_0000806	17	65810537	65816050	+	5513	751	ENSMUSG00000061950;	exon:65810538-65810680,exon:65815923-65816050	CON_1,CON_3,HFD_1,HFD_2,HFD_3,HSD_1,HSD_2,HSD_3	3,3,3,4,3,3,6,4	25,37,41,50,28,43,52,48	Ppp4r1	-||HEAT, type 2||Armadillo-type fold||Serine/threonine-protein phosphatase 4 regulatory subunit 1||HEAT repeat||Armadillo-like helical	3	0	3	3	4	3	3	6	4	58.9484	0	57.1832	42.2327	67.4047	56.816	55.9587	86.6151	79.4802	3.99507	2.09834	0.95205	0.50063	0.98499	FALSE	3.11681	2.15919	0.54298	0.72207	0.9865	FALSE	3.21124	4.25378	-0.41674	0.71261	0.99614	FALSE
mmu_circ_0000804	17	64710703	64714712	+	4009	626	ENSMUSG00000024085;	exon:64710704-64710869,exon:64713562-64713684,exon:64714598-64714712	CON_1,CON_2,CON_3,HFD_1,HFD_2,HFD_3,HSD_1,HSD_2,HSD_3	15,12,13,16,10,6,12,19,7	62,100,66,109,54,93,53,99,83	Man2a1	Glycoside hydrolase family 38, N-terminal domain||Glycoside hydrolase 38, N-terminal domain superfamily||Glycosyl hydrolase family 38, C-terminal||Glycoside hydrolase family 38, central domain||Galactose mutarotase-like domain superfamily||Glycoside hydrolase/deacetylase, beta/alpha-barrel||Glycosyl hydrolase, all-beta||Glycoside hydrolase families 57/38, central domain superfamily||Glycoside hyd…	15	12	13	16	10	6	12	19	7	294.742	203.283	247.794	225.241	168.512	113.632	223.835	274.281	139.09	11.5286	13.5011	-0.20976	0.71229	0.98897	FALSE	9.53852	13.8899	-0.5217	0.37142	0.98087	FALSE	9.86287	12.2943	-0.31559	0.60804	0.99144	FALSE
mmu_circ_0000805	17	65592290	65595054	-	2764	338	ENSMUSG00000024091;	exon:65592291-65592371,exon:65593440-65593543,exon:65594902-65595054	CON_1,CON_2,CON_3,HFD_1,HFD_2,HFD_3,HSD_1,HSD_2,HSD_3	2.29308e+26	27,44,26,31,45,28,18,29,26	Vapa	PapD-like superfamily||Immunoglobulin-like fold||Vesicle-associated membrane-protein-associated protein||Major sperm protein (MSP) domain||Vesicle-associated membrane protein-associated protein A	229	308	202	317	215	202	155	301	181	4499.72	5217.6	3850.33	4462.59	3623.01	3825.61	2891.2	4345.19	3596.48	195.119	245.728	-0.32971	0.10847	0.98499	FALSE	223.343	252.815	-0.17779	0.30966	0.98087	FALSE	230.559	207.796	0.14754	0.46458	0.99144	FALSE
mmu_circ_0000802	17	63471407	63490887	-	19480	513	ENSMUSG00000023965;	exon:63471408-63471539,exon:63487712-63487969,exon:63490765-63490887	CON_1,CON_2,CON_3,HFD_1,HFD_2,HFD_3,HSD_1,HSD_2,HSD_3	33,47,45,79,30,36,40,38,37	4,33,6,15,15,17,10,21,13	Fbxl17	Leucine-rich repeat||F-box-like domain superfamily||F-box domain||Leucine-rich repeat domain superfamily||Leucine-rich repeat, cysteine-containing subtype	33	47	45	79	30	36	40	38	37	648.432	796.192	857.747	1112.13	505.536	681.792	746.116	548.562	735.192	36.4076	41.645	-0.20196	0.53682	0.98499	FALSE	43.1758	42.8667	0.019986	0.95363	0.99903	FALSE	44.6506	38.8805	0.21569	0.54167	0.99144	FALSE
mmu_circ_0000803	17	64624527	64625451	+	924	397	ENSMUSG00000024085;	exon:64624528-64624779,exon:64625307-64625451	CON_1,CON_2,CON_3,HFD_1,HFD_2,HFD_3,HSD_1,HSD_2,HSD_3	41,39,51,54,43,41,35,54,38	82,102,109,138,71,137,83,115,79	Man2a1	Glycoside hydrolase family 38, N-terminal domain||Glycoside hydrolase 38, N-terminal domain superfamily||Glycosyl hydrolase family 38, C-terminal||Glycoside hydrolase family 38, central domain||Galactose mutarotase-like domain superfamily||Glycoside hydrolase/deacetylase, beta/alpha-barrel||Glycosyl hydrolase, all-beta||Glycoside hydrolase families 57/38, central domain superfamily||Glycoside hyd…	41	39	51	54	43	41	35	54	38	805.628	660.67	972.114	760.189	724.601	776.486	652.851	779.536	755.062	39.3394	44.0954	-0.15835	0.61988	0.98499	FALSE	42.3676	45.3858	-0.095789	0.75483	0.99354	FALSE	43.7051	41.9326	0.056764	0.85281	0.99761	FALSE
mmu_circ_0000800	17	56706861	56708280	+	1419	393	ENSMUSG00000002372;	exon:56706862-56706965,exon:56707163-56707238,exon:56707851-56707953,exon:56708171-56708280	CON_2,CON_3,HFD_1,HFD_2,HFD_3,HSD_1,HSD_2,HSD_3	8,5,13,8,4,4,6,5	107,136,92,103,94,92,121,93	Ranbp3	PH-like domain superfamily||Ran binding domain	0	8	5	13	8	4	4	6	5	0	135.522	95.3053	183.008	134.809	75.7547	74.6116	86.6151	99.3502	4.67789	4.17018	0.15012	0.89244	0.9996	FALSE	7.40505	4.29717	0.77656	0.40961	0.98087	FALSE	7.66074	4.98596	0.63278	0.44385	0.99144	FALSE
novel_circ_0000089	10	120145645	120146629	-	984	424	ENSMUSG00000020227;	exon:120145646-120145810,exon:120145898-120145960,exon:120146431-120146629	CON_2	2	6	Irak3	Protein kinase-like domain superfamily||Death domain||Interleukin-1 receptor-associated kinase 3||Death-like domain superfamily||Protein kinase domain||-	0	2	0	0	0	0	0	0	0	0	33.8805	0	0	0	0	0	0	0	0	0.615455	-1.8435	0.6488	0.98499	FALSE	0	0.633264	-1.9087	0.63725	0.98087	FALSE	0	0	NA	NA	NA	NA
novel_circ_0000088	10	120035350	120038793	+	3443	338	ENSMUSG00000034813;	exon:120035351-120035495,exon:120038599-120038793	CON_1,HFD_3	2,4	5,1	Grip1	PDZ superfamily||Glutamate receptor-interacting protein 1||PDZ domain 6||PDZ domain||-	2	0	0	0	0	4	0	0	0	39.2989	0	0	0	0	75.7547	0	0	0	0	0.71555	-2.0323	0.61412	0.98499	FALSE	1.3959	0.733817	0.9275	0.78694	0.99903	FALSE	1.42654	0	2.9359	0.4592	0.99144	FALSE
mmu_circ_0000384	12	69302323	69303962	+	1639	316	ENSMUSG00000020978;	exon:69302324-69302441	CON_1,CON_2,CON_3,HFD_1,HFD_2,HFD_3,HSD_1,HSD_2,HSD_3	25,29,22,27,24,23,14,30,24	28,38,36,37,40,39,29,60,38	Klhdc2	Kelch repeat type 2||Galactose oxidase/kelch, beta-propeller||Kelch-type beta propeller	25	29	22	27	24	23	14	30	24	491.236	491.267	419.343	380.094	404.428	435.59	261.14	433.075	476.881	21.0249	25.3852	-0.2679	0.52212	0.98499	FALSE	22.8492	26.1171	-0.196	0.61727	0.98087	FALSE	23.5597	22.3774	0.067338	0.87189	0.99761	FALSE
novel_circ_0000083	10	117817343	117818609	-	1266	259	ENSMUSG00000052681;	exon:117817344-117817460,exon:117818466-117818609	CON_1,CON_3,HFD_2,HFD_3,HSD_1,HSD_2,HSD_3	8,2,5,10,3,3,5	48,50,50,59,34,110,48	Rap1b	P-loop containing nucleoside triphosphate hydrolase||Small GTP-binding protein domain||Ras-related protein Rap1||Small GTPase||-||Small GTPase superfamily, Ras-type	8	0	2	0	5	10	3	3	5	157.196	0	38.1221	0	84.2559	189.387	55.9587	43.3075	99.3502	3.54147	3.54554	0.0076849	0.99542	0.9996	FALSE	5.07565	3.64091	0.47847	0.81354	0.99903	FALSE	5.19755	3.77735	0.44762	0.70261	0.99614	FALSE
novel_circ_0000082	10	117784994	117787911	-	2917	262	ENSMUSG00000052798;	exon:117784995-117785139,exon:117787793-117787911	CON_1,CON_2,HFD_1,HFD_2,HSD_1,HSD_2,HSD_3	6,11,4,2,5,5,3	17,30,20,17,7,17,21	Nup107	Nuclear pore protein 84/107||-	6	11	0	4	2	0	5	5	3	117.897	186.343	0	56.3103	33.7024	0	93.2644	72.1792	59.6101	4.0546	5.53165	-0.45578	0.67595	0.98499	FALSE	1.70258	5.6844	-1.7061	0.22403	0.98087	FALSE	1.76764	4.33222	-1.2566	0.37214	0.99144	FALSE
novel_circ_0014890	8	125124492	125135509	+	11017	147	ENSMUSG00000043051;	exon:125124493-125124640	CON_3,HFD_2	2,2	6,7	Disc1	Disrupted in schizophrenia 1	0	0	2	0	2	0	0	0	0	0	0	38.1221	0	33.7024	0	0	0	0	0	0.683342	-1.9743	0.6247	0.98499	FALSE	0.634361	0.705644	-0.15352	0.96785	0.99903	FALSE	0.652478	0	1.8143	0.65303	0.99144	FALSE
novel_circ_0002835	13	113922246	113967790	+	45544	411	ENSMUSG00000042348;	exon:113922247-113922391,exon:113934064-113934123,exon:113967582-113967790	CON_1,CON_2,CON_3,HFD_1,HFD_2,HFD_3,HSD_1,HSD_2,HSD_3	5,5,5,4,3,5,2,7,5	31,41,50,44,59,46,49,73,55	Arl15	-||Small GTPase superfamily, ARF/SAR type||P-loop containing nucleoside triphosphate hydrolase	5	5	5	4	3	5	2	7	5	98.2473	84.7013	95.3053	56.3103	50.5536	94.6934	37.3058	101.051	99.3502	4.27189	5.03587	-0.22621	0.81835	0.9996	FALSE	3.76463	5.18181	-0.46975	0.63443	0.98087	FALSE	3.87706	4.53938	-0.24531	0.81749	0.99761	FALSE
novel_circ_0002837	13	115012159	115016260	-	4101	298	ENSMUSG00000042284;	exon:115012160-115012310,exon:115016112-115016260	CON_2	3	202	Itga1	Integrin domain superfamily||Integrin alpha beta-propellor||Integrin alpha, N-terminal||von Willebrand factor A-like domain superfamily||Integrin alpha chain||von Willebrand factor, type A||Integrin alpha-2||Integrin alpha chain, C-terminal cytoplasmic region, conserved site||FG-GAP repeat	0	3	0	0	0	0	0	0	0	0	50.8208	0	0	0	0	0	0	0	0	0.923183	-2.4234	0.54478	0.98499	FALSE	0	0.949895	-2.4887	0.534	0.98087	FALSE	0	0	NA	NA	NA	NA
novel_circ_0002832	13	112945069	112948355	+	3286	266	ENSMUSG00000042426;	exon:112945070-112945193,exon:112948212-112948355	CON_3	4	5	Dhx29	P-loop containing nucleoside triphosphate hydrolase||Helicase superfamily 1/2, ATP-binding domain||DNA/RNA helicase, ATP-dependent, DEAH-box type, conserved site||-||Helicase-associated domain||DEAD/DEAH box helicase domain||Helicase, C-terminal||ATP-dependent RNA helicase DHX29||Domain of unknown function DUF1605	0	0	4	0	0	0	0	0	0	0	0	76.2442	0	0	0	0	0	0	0	1.36668	-2.9759	0.4537	0.98499	FALSE	0	1.41129	-3.046	0.44311	0.98087	FALSE	0	0	NA	NA	NA	NA
novel_circ_0014892	8	125148411	125165181	+	16770	344	ENSMUSG00000043051;	exon:125148412-125148466,exon:125155008-125155110,exon:125164993-125165181	CON_1,CON_2,CON_3,HSD_3	2,5,5,4	1,5,1,4	Disc1	Disrupted in schizophrenia 1	2	5	5	0	0	0	0	0	4	39.2989	84.7013	95.3053	0	0	0	0	0	79.4802	1.38589	3.96254	-1.5609	0.35914	0.98499	FALSE	0	4.08109	-4.5818	0.03446	0.98087	TRUE	0	1.47253	-3.0563	0.44113	0.99144	FALSE
novel_circ_0002838	13	115012159	115031193	-	19034	238	ENSMUSG00000042284;	exon:115012160-115012310,exon:115031105-115031193	CON_3,HFD_2	2,3	96180	Itga1	Integrin domain superfamily||Integrin alpha beta-propellor||Integrin alpha, N-terminal||von Willebrand factor A-like domain superfamily||Integrin alpha chain||von Willebrand factor, type A||Integrin alpha-2||Integrin alpha chain, C-terminal cytoplasmic region, conserved site||FG-GAP repeat	0	0	2	0	3	0	0	0	0	0	0	38.1221	0	50.5536	0	0	0	0	0	0.683342	-1.9743	0.6247	0.98499	FALSE	0.951542	0.705644	0.43287	0.90583	0.99903	FALSE	0.978717	0	2.4003	0.54776	0.99144	FALSE
novel_circ_0002839	13	115030035	115035385	-	5350	438	ENSMUSG00000042284;	exon:115030036-115030163,exon:115030883-115030994,exon:115031105-115031193,exon:115035273-115035385	CON_1,CON_2,CON_3,HFD_1,HFD_2,HFD_3,HSD_1,HSD_2,HSD_3	15,9,14,11,9,10,15,26,18	98,174,86,177,197,144,82,219,195	Itga1	Integrin domain superfamily||Integrin alpha beta-propellor||Integrin alpha, N-terminal||von Willebrand factor A-like domain superfamily||Integrin alpha chain||von Willebrand factor, type A||Integrin alpha-2||Integrin alpha chain, C-terminal cytoplasmic region, conserved site||FG-GAP repeat	15	9	14	11	9	10	15	26	18	294.742	152.462	266.855	154.853	151.661	189.387	279.793	375.332	357.661	18.2156	12.9196	0.50915	0.31952	0.98499	FALSE	9.28197	13.2928	-0.51454	0.38568	0.98087	FALSE	9.56921	19.4065	-1.0283	0.051097	0.99144	FALSE
novel_circ_0002953	13	29918575	29920225	-	1650	312	ENSMUSG00000016477;	exon:29918576-29918777,exon:29920114-29920225	HFD_1,HFD_2	2,3	9,6	E2f3	Winged helix DNA-binding domain superfamily||E2F transcription factor, CC-MB domain||E2F Family||Winged helix-like DNA-binding domain superfamily||E2F-DP heterodimerization region||E2F/DP family, winged-helix DNA-binding domain	0	0	0	2	3	0	0	0	0	0	0	0	28.1551	50.5536	0	0	0	0	0	0	NA	NA	NA	NA	1.48565	0	2.9688	0.41822	0.98087	FALSE	1.5363	0	3.0565	0.41949	0.99144	FALSE
novel_circ_0002952	13	29846227	29850108	-	3881	281	ENSMUSG00000006191;	exon:29846228-29846340,exon:29849939-29850108	CON_1,CON_2,HFD_1,HFD_3,HSD_3	2,6,8,2,4	25,25,20,25,18	Cdkal1	Radical SAM, alpha/beta horseshoe||Elp3/MiaB/NifB||Methylthiotransferase||MiaB-like tRNA modifying enzyme, archaeal-type||-||TRAM domain||Methylthiotransferase, conserved site||Methylthiotransferase, N-terminal domain superfamily||Methylthiotransferase, N-terminal||Radical SAM	2	6	0	8	0	2	0	0	4	39.2989	101.642	0	112.621	0	37.8774	0	0	79.4802	1.38589	2.56192	-0.91863	0.68303	0.98499	FALSE	2.83438	2.63361	0.11242	0.9464	0.99903	FALSE	2.9436	1.47253	1.0379	0.62169	0.99144	FALSE
novel_circ_0005671	17	47379077	47391101	+	12024	83	n/a	intergenic_region:47379078-47379161	HFD_1	2	0	--	-	0	0	0	2	0	0	0	0	0	0	0	0	28.1551	0	0	0	0	0	0	0	NA	NA	NA	NA	0.534108	0	1.5189	0.70802	0.98087	FALSE	0.557583	0	1.6184	0.68858	0.99144	FALSE
novel_circ_0005670	17	47337550	47348856	+	11306	407	ENSMUSG00000064043;	exon:47337551-47337639,exon:47341066-47341179,exon:47348650-47348856	HFD_1,HSD_1	2,4	8,6	--	-	0	0	0	2	0	0	4	0	0	0	0	0	28.1551	0	0	74.6116	0	0	1.34538	0	2.8571	0.47162	0.98499	FALSE	0.534108	0	1.5189	0.70802	0.98087	FALSE	0.557583	1.45619	-1.3435	0.70799	0.99614	FALSE
novel_circ_0005677	17	49435094	49439606	+	4512	351	ENSMUSG00000064120;	intron:49435095-49435262,intron:49439422-49439606	CON_2,HSD_1,HSD_2	3,3,5	33,18,37	Mocs1	-||Molybdopterin cofactor biosynthesis C (MoaC) domain superfamily||Molybdopterin cofactor biosynthesis C (MoaC) domain||Aldolase-type TIM barrel||Elp3/MiaB/NifB||Molybdenum cofactor biosynthesis protein A||Radical SAM||Molybdenum cofactor synthesis C-terminal||Molybdenum cofactor biosynthesis C||MoaA/nifB/pqqE, iron-sulphur binding, conserved site	0	3	0	0	0	0	3	5	0	0	50.8208	0	0	0	0	55.9587	72.1792	0	2.34249	0.923183	1.3258	0.60019	0.98499	FALSE	0	0.949895	-2.4887	0.534	0.98087	FALSE	0	2.49973	-3.8335	0.23041	0.99144	FALSE
novel_circ_0013885	7	115659515	115662444	-	2929	240	ENSMUSG00000051910;	exon:115659516-115659584,exon:115662272-115662444	CON_1,CON_2,HFD_1,HFD_2,HFD_3,HSD_1,HSD_2,HSD_3	4,7,6,5,5,4,13,8	12,16,14,9,8,10,11,10	Sox6	Transcription factor SOX-5/6||High mobility group box domain||High mobility group box domain superfamily	4	7	0	6	5	5	4	13	8	78.5978	118.582	0	84.4654	84.2559	94.6934	74.6116	187.666	158.96	7.58414	3.58519	1.076	0.27562	0.98499	FALSE	4.9331	3.68406	0.40882	0.71182	0.98226	FALSE	5.08712	8.06098	-0.67757	0.40084	0.99144	FALSE
novel_circ_0002955	13	30194535	30202420	+	7885	317	ENSMUSG00000038732;	exon:30194536-30194681,exon:30195710-30195787,exon:30202325-30202420	CON_1,CON_2,CON_3,HFD_2,HFD_3,HSD_1,HSD_2,HSD_3	16,36,14,37,26,8,34,36	22,48,11,61,41,37,68,63	Mboat1	Membrane bound O-acyl transferase, MBOAT	16	36	14	0	37	26	8	34	36	314.391	609.849	266.855	0	623.494	492.406	149.223	490.819	715.322	24.2313	21.586	0.16316	0.81295	0.9996	FALSE	20.809	22.2088	-0.097444	0.94789	0.99903	FALSE	21.3434	25.7367	-0.27247	0.86136	0.99761	FALSE
novel_circ_0002954	13	30194535	30195787	+	1252	222	ENSMUSG00000038732;	exon:30194536-30194681,exon:30195710-30195787	HFD_1,HSD_3	2,5	27,77	Mboat1	Membrane bound O-acyl transferase, MBOAT	0	0	0	2	0	0	0	0	5	0	0	0	28.1551	0	0	0	0	99.3502	1.73237	0	3.2207	0.41549	0.98499	FALSE	0.534108	0	1.5189	0.70802	0.98087	FALSE	0.557583	1.84066	-1.6769	0.61666	0.99144	FALSE
novel_circ_0005679	17	49671032	49686520	+	15488	276	ENSMUSG00000023999;	exon:49671033-49671180,exon:49686391-49686520	HFD_1	3	5	Kif6	-||Kinesin motor domain||P-loop containing nucleoside triphosphate hydrolase||Kinesin-like protein||Kinesin motor domain, conserved site||Kinesin motor domain superfamily	0	0	0	3	0	0	0	0	0	0	0	0	42.2327	0	0	0	0	0	0	0	NA	NA	NA	NA	0.801163	0	2.0951	0.6011	0.98087	FALSE	0.836375	0	2.1951	0.58373	0.99144	FALSE
novel_circ_0006063	18	10134415	10140888	-	6473	184	ENSMUSG00000024290;	exon:10134416-10134500,exon:10140788-10140888	CON_1,CON_3,HSD_3	2,2,2	8,19,14	Rock1	Protein kinase-like domain superfamily||Rho binding domain||AGC-kinase, C-terminal||PH-like domain superfamily||Serine/threonine-protein kinase, active site||Rho-associated protein kinase 1/2||Rho-associated protein kinase 1, HR1||Pleckstrin homology domain||Protein kinase C-like, phorbol ester/diacylglycerol-binding domain||Protein kinase domain||Protein kinase, ATP binding site||-	2	0	2	0	0	0	0	0	2	39.2989	0	38.1221	0	0	0	0	0	39.7401	0.692946	1.39889	-1.0328	0.74326	0.99548	FALSE	0	1.43946	-3.0718	0.40605	0.98087	FALSE	0	0.736264	-2.0487	0.61104	0.99144	FALSE
novel_circ_0006062	18	10129304	10140888	-	11584	100	ENSMUSG00000024290;	exon:10140788-10140888	CON_2,HFD_1,HFD_2,HFD_3,HSD_1,HSD_2,HSD_3	4,10,6,2,2,4,8	15,7,3,4,1,14,11	Rock1	Protein kinase-like domain superfamily||Rho binding domain||AGC-kinase, C-terminal||PH-like domain superfamily||Serine/threonine-protein kinase, active site||Rho-associated protein kinase 1/2||Rho-associated protein kinase 1, HR1||Pleckstrin homology domain||Protein kinase C-like, phorbol ester/diacylglycerol-binding domain||Protein kinase domain||Protein kinase, ATP binding site||-	0	4	0	10	6	2	2	4	8	0	67.761	0	140.776	101.107	37.8774	37.3058	57.7434	158.96	4.51124	1.23091	1.8257	0.2673	0.98499	FALSE	5.27157	1.26653	2.0172	0.17708	0.98087	FALSE	5.45862	4.79922	0.21453	0.82743	0.99761	FALSE
novel_circ_0009701	2	72174422	72180103	+	5681	53	ENSMUSG00000049044;	exon:72174423-72174476	HFD_2,HFD_3	8,4	1,1	Rapgef4	Cyclic nucleotide-binding-like||Ras guanine-nucleotide exchange factors catalytic domain||Ras-like guanine nucleotide exchange factor, N-terminal||Winged helix-like DNA-binding domain superfamily||Ras guanine nucleotide exchange factor domain superfamily||Ras guanine-nucleotide exchange factor, conserved site||Ubiquitin-like domain superfamily||DEP domain||Ras-like guanine nucleotide exchange fac…	0	0	0	0	8	4	0	0	0	0	0	0	0	134.809	75.7547	0	0	0	0	0	NA	NA	NA	NA	3.93334	0	4.3673	0.22265	0.98087	FALSE	4.03645	0	4.4447	0.21375	0.99144	FALSE
novel_circ_0009700	2	72031032	72045248	+	14216	376	ENSMUSG00000049044;	exon:72031033-72031175,exon:72034031-72034119,exon:72045102-72045248	CON_1,CON_3,HFD_2	3,6,2	2,3,4	Rapgef4	Cyclic nucleotide-binding-like||Ras guanine-nucleotide exchange factors catalytic domain||Ras-like guanine nucleotide exchange factor, N-terminal||Winged helix-like DNA-binding domain superfamily||Ras guanine nucleotide exchange factor domain superfamily||Ras guanine-nucleotide exchange factor, conserved site||Ubiquitin-like domain superfamily||DEP domain||Ras-like guanine nucleotide exchange fac…	3	0	6	0	2	0	0	0	0	58.9484	0	114.366	0	33.7024	0	0	0	0	0	3.12335	-4.1669	0.14262	0.98499	FALSE	0.634361	3.21766	-2.3489	0.31103	0.98087	FALSE	0.652478	0	1.8143	0.65303	0.99144	FALSE
novel_circ_0006067	18	10574874	10586041	-	11167	143	ENSMUSG00000024293;	exon:10574875-10575018	CON_1,CON_3,HFD_2,HFD_3,HSD_1,HSD_2	25,40,24,26,37,38	11,33,13,17,14,15	Esco1	N-acetyltransferase ESCO, acetyl-transferase domain||-||N-acetyltransferase ESCO, zinc-finger||N-acetyltransferase ESCO1	25	0	40	0	24	26	37	38	0	491.236	0	762.442	0	404.428	492.406	690.157	548.562	0	22.579	22.6112	-0.0009682	0.99968	0.99988	FALSE	16.6857	23.2856	-0.48173	0.84038	0.99903	FALSE	17.1023	24.1674	-0.50074	0.8323	0.99761	FALSE
novel_circ_0009706	2	72940542	72946738	-	6196	388	ENSMUSG00000027109;	exon:72940543-72940739,exon:72946546-72946738	CON_1,CON_2,CON_3,HFD_1,HFD_2,HSD_1	4,3,3,3,4,2	45,57,51,74,54,38	Sp3	Zinc finger C2H2 superfamily||Zinc finger C2H2-type||Transcription factor Sp3	4	3	3	3	4	0	2	0	0	78.5978	50.8208	57.1832	42.2327	67.4047	0	37.3058	0	0	0.672692	3.3793	-2.3659	0.24734	0.98499	FALSE	2.06988	3.476	-0.72863	0.62005	0.98087	FALSE	2.14133	0.728095	1.5885	0.56703	0.99144	FALSE
novel_circ_0001288	11	51729451	51734661	-	5210	234	ENSMUSG00000036391;	exon:51733770-51733927,exon:51734584-51734661	CON_1,CON_2,CON_3,HFD_1,HFD_2,HFD_3,HSD_1,HSD_2,HSD_3	3,5,5,9,3,3,8,7,4	14,25,15,15,20,10,23,14,20	Sec24a	Sec23/Sec24 helical domain superfamily||von Willebrand factor A-like domain superfamily||Zinc finger, Sec23/Sec24-type superfamily||ADF-H/Gelsolin-like domain superfamily||Sec23/Sec24 beta-sandwich||Sec24-like, trunk domain||Sec23/Sec24, helical domain||Sec23/Sec24, trunk domain||Gelsolin-like domain||Gelsolin-like domain superfamily||Zinc finger, Sec23/Sec24-type	3	5	5	9	3	3	8	7	4	58.9484	84.7013	95.3053	126.698	50.5536	56.816	149.223	101.051	79.4802	5.94349	4.32032	0.45641	0.62101	0.98499	FALSE	4.40195	4.448	0.00095011	0.99925	0.99945	FALSE	4.55775	6.35553	-0.45757	0.61547	0.99144	FALSE
novel_circ_0001289	11	5209938	5215531	-	5593	277	ENSMUSG00000020393;	exon:5209939-5210092,exon:5215407-5215531	CON_2,HFD_1,HSD_2	3,2,4	58,48,46	Kremen1	Kringle superfamily||Kremen||Kringle, conserved site||Spermadhesin, CUB domain superfamily||CUB domain||Carbohydrate-binding WSC||Kringle||Kringle-like fold	0	3	0	2	0	0	0	4	0	0	50.8208	0	28.1551	0	0	0	57.7434	0	1.06676	0.923183	0.2168	0.95058	0.9996	FALSE	0.534108	0.949895	-0.81043	0.82825	0.99903	FALSE	0.557583	1.12607	-1.0059	0.78958	0.99761	FALSE
novel_circ_0001286	11	51723583	51729575	-	5992	235	ENSMUSG00000036391;	exon:51723584-51723696,exon:51729452-51729575	HSD_3	2	24	Sec24a	Sec23/Sec24 helical domain superfamily||von Willebrand factor A-like domain superfamily||Zinc finger, Sec23/Sec24-type superfamily||ADF-H/Gelsolin-like domain superfamily||Sec23/Sec24 beta-sandwich||Sec24-like, trunk domain||Sec23/Sec24, helical domain||Sec23/Sec24, trunk domain||Gelsolin-like domain||Gelsolin-like domain superfamily||Zinc finger, Sec23/Sec24-type	0	0	0	0	0	0	0	0	2	0	0	0	0	0	0	0	0	39.7401	0.692946	0	1.8892	0.63904	0.98499	FALSE	0	0	NA	NA	NA	NA	0	0.736264	-2.0487	0.61104	0.99144	FALSE
novel_circ_0001287	11	51726484	51731905	-	5421	337	ENSMUSG00000036391;	exon:51726485-51726594,exon:51729452-51729578,exon:51731803-51731905	CON_1,CON_2,HFD_1,HFD_2,HFD_3,HSD_1,HSD_2,HSD_3	4,3,14,6,5,10,2,3	24,37,15,26,17,23,31,30	Sec24a	Sec23/Sec24 helical domain superfamily||von Willebrand factor A-like domain superfamily||Zinc finger, Sec23/Sec24-type superfamily||ADF-H/Gelsolin-like domain superfamily||Sec23/Sec24 beta-sandwich||Sec24-like, trunk domain||Sec23/Sec24, helical domain||Sec23/Sec24, trunk domain||Gelsolin-like domain||Gelsolin-like domain superfamily||Zinc finger, Sec23/Sec24-type	4	3	0	14	6	5	10	2	3	78.5978	50.8208	0	197.086	101.107	94.6934	186.529	28.8717	59.6101	4.93626	2.35428	1.0598	0.42386	0.98499	FALSE	7.38671	2.41753	1.6248	0.12391	0.98087	FALSE	7.64369	5.30791	0.56497	0.52152	0.99144	FALSE
novel_circ_0009709	2	73141897	73156913	-	15016	352	ENSMUSG00000027108;	exon:73141898-73141995,exon:73142308-73142388,exon:73156738-73156913	CON_3,HFD_2,HSD_1,HSD_3	3,2,3,2	23,23,18,34	Ola1	YchF, C-terminal domain||Ribosome-binding ATPase YchF/Obg-like ATPase 1||YchF, N-terminal||Beta-grasp domain superfamily||TGS-like domain superfamily||P-loop containing nucleoside triphosphate hydrolase||OBG-type guanine nucleotide-binding (G) domain||GTP binding domain||TGS-like	0	0	3	0	2	0	3	0	2	0	0	57.1832	0	33.7024	0	55.9587	0	39.7401	1.70198	1.02501	0.72467	0.79701	0.9996	FALSE	0.634361	1.05847	-0.73993	0.83901	0.99903	FALSE	0.652478	1.82841	-1.4815	0.62045	0.99144	FALSE
novel_circ_0009708	2	72970154	72971514	-	1360	33	ENSMUSG00000027109;	exon:72970155-72970188	CON_1	24	40	Sp3	Zinc finger C2H2 superfamily||Zinc finger C2H2-type||Transcription factor Sp3	24	0	0	0	0	0	0	0	0	471.587	0	0	0	0	0	0	0	0	0	8.58659	-5.6279	0.15079	0.98499	FALSE	0	8.8058	-5.6884	0.14645	0.98087	FALSE	0	0	NA	NA	NA	NA
novel_circ_0001283	11	51716438	51729578	-	13140	261	ENSMUSG00000036391;	exon:51716439-51716645,exon:51717724-51717779	CON_1,HFD_2,HSD_2	2,4,2	16,19,31	Sec24a	Sec23/Sec24 helical domain superfamily||von Willebrand factor A-like domain superfamily||Zinc finger, Sec23/Sec24-type superfamily||ADF-H/Gelsolin-like domain superfamily||Sec23/Sec24 beta-sandwich||Sec24-like, trunk domain||Sec23/Sec24, helical domain||Sec23/Sec24, trunk domain||Gelsolin-like domain||Gelsolin-like domain superfamily||Zinc finger, Sec23/Sec24-type	2	0	0	0	4	0	0	2	0	39.2989	0	0	0	67.4047	0	0	28.8717	0	0.53338	0.71555	-0.37651	0.92357	0.9996	FALSE	1.26872	0.733817	0.80134	0.81835	0.99903	FALSE	1.30496	0.563036	1.1694	0.7503	0.99761	FALSE
novel_circ_0001280	11	51627621	51628025	-	404	285	ENSMUSG00000001054;	exon:51627622-51627762,exon:51627880-51628025	HSD_1	2	59	Rmnd5b	-||CRA domain||LIS1 homology motif||CTLH/CRA C-terminal to LisH motif domain||CTLH, C-terminal LisH motif||RING-type zinc-finger, LisH dimerisation motif||Protein RMD5 homologue B, degenerated RING finger	0	0	0	0	0	0	2	0	0	0	0	0	0	0	0	37.3058	0	0	0.672692	0	1.8517	0.64596	0.98499	FALSE	0	0	NA	NA	NA	NA	0	0.728095	-2.0346	0.6136	0.99144	FALSE
novel_circ_0000883	11	106868534	106875939	-	7405	390	ENSMUSG00000018363;	exon:106868535-106868668,exon:106868997-106869108,exon:106871502-106871610,exon:106875901-106875939	CON_1,CON_2,HFD_1,HFD_2,HFD_3,HSD_2	9,7,10,7,3,7	28,35,33,32,39,58	Smurf2	-||HECT domain||WW domain superfamily||C2 domain superfamily||C2 domain||E3 ubiquitin-protein ligase, SMURF1 type||HECT, E3 ligase catalytic domain||WW domain	9	7	0	10	7	3	0	7	0	176.845	118.582	0	140.776	117.958	56.816	0	101.051	0	1.86683	5.37407	-1.5045	0.58118	0.98499	FALSE	5.93773	5.5186	0.11872	0.90238	0.99903	FALSE	6.1415	1.97062	1.5634	0.23251	0.99144	FALSE
novel_circ_0000887	11	107080722	107082700	-	1978	187	ENSMUSG00000040481;	exon:107082513-107082700	CON_2	2	15	Bptf	Bromodomain, conserved site||Zinc finger, PARP-type||Bromodomain||Zinc finger, RING/FYVE/PHD-type||WHIM2 domain||Zinc finger, PHD-type, conserved site||Zinc finger, PHD-finger||DDT domain||Zinc finger, PHD-type||Bromodomain-like superfamily||Nucleosome-remodeling factor subunit BPTF||Zinc finger, FYVE/PHD-type	0	2	0	0	0	0	0	0	0	0	33.8805	0	0	0	0	0	0	0	0	0.615455	-1.8435	0.6488	0.98499	FALSE	0	0.633264	-1.9087	0.63725	0.98087	FALSE	0	0	NA	NA	NA	NA
novel_circ_0000886	11	107076521	107077798	-	1277	317	ENSMUSG00000040481;	exon:107076522-107076701,exon:107077660-107077798	CON_2	8	33	Bptf	Bromodomain, conserved site||Zinc finger, PARP-type||Bromodomain||Zinc finger, RING/FYVE/PHD-type||WHIM2 domain||Zinc finger, PHD-type, conserved site||Zinc finger, PHD-finger||DDT domain||Zinc finger, PHD-type||Bromodomain-like superfamily||Nucleosome-remodeling factor subunit BPTF||Zinc finger, FYVE/PHD-type	0	8	0	0	0	0	0	0	0	0	135.522	0	0	0	0	0	0	0	0	2.46182	-3.8326	0.27928	0.98499	FALSE	0	2.53305	-3.898	0.26583	0.98087	FALSE	0	0	NA	NA	NA	NA
novel_circ_0000884	11	107061683	107062782	-	1099	397	ENSMUSG00000040481;	exon:107061684-107061835,exon:107062536-107062782	CON_2,HFD_2,HSD_2	4,4,4	31,20,25	Bptf	Bromodomain, conserved site||Zinc finger, PARP-type||Bromodomain||Zinc finger, RING/FYVE/PHD-type||WHIM2 domain||Zinc finger, PHD-type, conserved site||Zinc finger, PHD-finger||DDT domain||Zinc finger, PHD-type||Bromodomain-like superfamily||Nucleosome-remodeling factor subunit BPTF||Zinc finger, FYVE/PHD-type	0	4	0	0	4	0	0	4	0	0	67.761	0	0	67.4047	0	0	57.7434	0	1.06676	1.23091	-0.1939	0.95339	0.9996	FALSE	1.26872	1.26653	-0.013692	0.99658	0.99903	FALSE	1.30496	1.12607	0.1831	0.95561	0.99761	FALSE
novel_circ_0000889	11	107095715	107099789	-	4074	432	ENSMUSG00000040481;	exon:107095716-107095925,exon:107099566-107099789	CON_3,HFD_2	3,4	26,27	Bptf	Bromodomain, conserved site||Zinc finger, PARP-type||Bromodomain||Zinc finger, RING/FYVE/PHD-type||WHIM2 domain||Zinc finger, PHD-type, conserved site||Zinc finger, PHD-finger||DDT domain||Zinc finger, PHD-type||Bromodomain-like superfamily||Nucleosome-remodeling factor subunit BPTF||Zinc finger, FYVE/PHD-type	0	0	3	0	4	0	0	0	0	0	0	57.1832	0	67.4047	0	0	0	0	0	1.02501	-2.5603	0.52141	0.98499	FALSE	1.26872	1.05847	0.2624	0.93682	0.99903	FALSE	1.30496	0	2.8159	0.47832	0.99144	FALSE
novel_circ_0000888	11	107095001	107099789	-	4788	411	ENSMUSG00000040481;	exon:107095002-107095190,exon:107099566-107099789	CON_1,CON_2,CON_3,HFD_1,HFD_2,HFD_3,HSD_2,HSD_3	4,5,3,3,6,2,4,5	19,17,7,12,17,13,21,17	Bptf	Bromodomain, conserved site||Zinc finger, PARP-type||Bromodomain||Zinc finger, RING/FYVE/PHD-type||WHIM2 domain||Zinc finger, PHD-type, conserved site||Zinc finger, PHD-finger||DDT domain||Zinc finger, PHD-type||Bromodomain-like superfamily||Nucleosome-remodeling factor subunit BPTF||Zinc finger, FYVE/PHD-type	4	5	3	3	6	2	0	4	5	78.5978	84.7013	57.1832	42.2327	101.107	37.8774	0	57.7434	99.3502	2.79913	3.99475	-0.51362	0.69523	0.98499	FALSE	3.4022	4.10926	-0.27587	0.80658	0.99903	FALSE	3.50708	2.96673	0.23778	0.86239	0.99761	FALSE
novel_circ_0002485	12	71060061	71063324	+	3263	328	ENSMUSG00000048118;	exon:71061531-71061628,exon:71063093-71063324	CON_2,CON_3,HFD_2,HFD_3,HSD_1,HSD_2	2,5,3,5,2,9	3,5,10,7,4,7	Arid4a	Chromo-like domain superfamily||ARID DNA-binding domain||ARID DNA-binding domain superfamily||RBB1NT||Tudor domain||Chromo/chromo shadow domain||RNA binding activity-knot of a chromodomain	0	2	5	0	3	5	2	9	0	0	33.8805	95.3053	0	50.5536	94.6934	37.3058	129.923	0	3.0729	2.32381	0.42402	0.80452	0.9996	FALSE	2.69641	2.39737	0.14735	0.93246	0.99903	FALSE	2.7619	3.26176	-0.28897	0.85676	0.99761	FALSE
novel_circ_0011485	4	63565656	63570093	+	4437	365	ENSMUSG00000045917;	exon:63565657-63565766,exon:63568461-63568568,exon:63569944-63570093	HSD_3	2	37	Tmem268	Protein of unknown function DUF4481	0	0	0	0	0	0	0	0	2	0	0	0	0	0	0	0	0	39.7401	0.692946	0	1.8892	0.63904	0.98499	FALSE	0	0	NA	NA	NA	NA	0	0.736264	-2.0487	0.61104	0.99144	FALSE
novel_circ_0002487	12	71216041	71219299	+	3258	262	ENSMUSG00000034601;	exon:71216042-71216196,exon:71219191-71219299	HFD_2	2	1	2700049A03Rik	Protein TALPID3||-	0	0	0	0	2	0	0	0	0	0	0	0	0	33.7024	0	0	0	0	0	0	NA	NA	NA	NA	0.634361	0	1.7334	0.66753	0.98087	FALSE	0.652478	0	1.8143	0.65303	0.99144	FALSE
novel_circ_0002486	12	71152649	71157170	+	4521	123	ENSMUSG00000034601;	exon:71157047-71157170	HSD_1	2	6	2700049A03Rik	Protein TALPID3||-	0	0	0	0	0	0	2	0	0	0	0	0	0	0	0	37.3058	0	0	0.672692	0	1.8517	0.64596	0.98499	FALSE	0	0	NA	NA	NA	NA	0	0.728095	-2.0346	0.6136	0.99144	FALSE
novel_circ_0002481	12	71019373	71023590	+	4217	265	ENSMUSG00000048118;	exon:71019374-71019484,exon:71022193-71022258,exon:71023500-71023590	CON_2,HSD_1	6,2	22,12	Arid4a	Chromo-like domain superfamily||ARID DNA-binding domain||ARID DNA-binding domain superfamily||RBB1NT||Tudor domain||Chromo/chromo shadow domain||RNA binding activity-knot of a chromodomain	0	6	0	0	0	0	2	0	0	0	101.642	0	0	0	0	37.3058	0	0	0.672692	1.84637	-1.4826	0.64615	0.98499	FALSE	0	1.89979	-3.4835	0.36557	0.98087	FALSE	0	0.728095	-2.0346	0.6136	0.99144	FALSE
novel_circ_0012859	6	108844826	108846846	+	2020	357	ENSMUSG00000030104;	exon:108844827-108845010,exon:108846672-108846846	HFD_3	2	126	Edem1	-||Seven-hairpin glycosidases||Glycoside hydrolase family 47||Six-hairpin glycosidase-like superfamily	0	0	0	0	0	2	0	0	0	0	0	0	0	0	37.8774	0	0	0	0	0	NA	NA	NA	NA	0.697949	0	1.854	0.64509	0.98087	FALSE	0.713271	0	1.9267	0.63226	0.99144	FALSE
novel_circ_0002483	12	71045023	71047360	+	2337	245	ENSMUSG00000048118;	exon:71045024-71045103,exon:71047194-71047360	HSD_2	2	18	Arid4a	Chromo-like domain superfamily||ARID DNA-binding domain||ARID DNA-binding domain superfamily||RBB1NT||Tudor domain||Chromo/chromo shadow domain||RNA binding activity-knot of a chromodomain	0	0	0	0	0	0	0	2	0	0	0	0	0	0	0	0	28.8717	0	0.53338	0	1.5621	0.70028	0.98499	FALSE	0	0	NA	NA	NA	NA	0	0.563036	-1.7139	0.67182	0.99144	FALSE
novel_circ_0011484	4	63461281	63472868	-	11587	125	ENSMUSG00000039137;	exon:63461282-63461407	HFD_2	4	0	Whrn	PDZ superfamily||-||Whirlin||PDZ domain	0	0	0	0	4	0	0	0	0	0	0	0	0	67.4047	0	0	0	0	0	0	NA	NA	NA	NA	1.26872	0	2.7352	0.49101	0.98087	FALSE	1.30496	0	2.8159	0.47832	0.99144	FALSE
novel_circ_0002489	12	71895726	71915788	+	20062	308	ENSMUSG00000034574;	exon:71895727-71895946,exon:71915699-71915788	CON_1,CON_2,CON_3,HFD_1,HFD_2,HFD_3,HSD_1,HSD_2,HSD_3	17,34,7,20,11,9,10,13,13	34,81,56,45,67,50,37,74,45	Daam1	Armadillo-like helical||Armadillo-type fold||Rho GTPase-binding/formin homology 3 (GBD/FH3) domain||Formin, FH2 domain||Diaphanous autoregulatory (DAD) domain||Formin, GTPase-binding domain||Formin, FH3 domain	17	34	7	20	11	9	10	13	13	334.041	575.969	133.427	281.551	185.363	170.448	186.529	187.666	258.311	11.3346	18.9366	-0.75234	0.18882	0.98499	FALSE	11.9708	19.4727	-0.69842	0.21605	0.98087	FALSE	12.3742	12.0859	0.050099	0.93009	0.99761	FALSE
novel_circ_0002488	12	71431206	71436739	+	5533	226	ENSMUSG00000113441;	exon:71431207-71431347,exon:71436653-71436739	CON_2,HFD_1,HSD_1	4,5,3	1,0,0	--	-	0	4	0	5	0	0	3	0	0	0	67.761	0	70.3878	0	0	55.9587	0	0	1.00904	1.23091	-0.30947	0.92665	0.9996	FALSE	1.33527	1.26653	0.082525	0.97914	0.99903	FALSE	1.39396	1.09214	0.38265	0.9066	0.99761	FALSE
novel_circ_0009567	2	59795794	59797752	+	1958	397	ENSMUSG00000035168;	exon:59795795-59796026,exon:59797586-59797752	CON_3,HFD_1,HFD_2,HFD_3,HSD_2	3,6,4,10,11	20,18,19,23,41	Tanc1	Ankyrin repeat-containing domain superfamily||Tetratricopeptide repeat-containing domain||Ankyrin repeat-containing domain||Tetratricopeptide repeat||Ankyrin repeat||Tetratricopeptide-like helical domain superfamily	0	0	3	6	4	10	0	11	0	0	0	57.1832	84.4654	67.4047	189.387	0	158.794	0	2.93359	1.02501	1.5264	0.69135	0.98499	FALSE	6.36079	1.05847	2.5977	0.066818	0.98087	FALSE	6.54406	3.0967	1.0441	0.55889	0.99144	FALSE
mmu_circ_0001009	2	35643887	35661625	+	17738	238	ENSMUSG00000026883;	exon:35643888-35643991,exon:35661492-35661625	CON_1,CON_2,CON_3,HFD_1,HFD_2,HFD_3,HSD_1,HSD_2,HSD_3	7,15,11,5,2,8,6,13,11	21,44,43,25,43,45,37,48,43	Dab2ip	Ras GTPase-activating protein||C2 domain||C2 domain superfamily||PH-like domain superfamily||Rho GTPase activation protein||Ras GTPase-activating domain||Pleckstrin homology domain||Disabled homologue 2-interacting protein||Domain of unknown function DUF3498||-||Ras GTPase-activating protein, conserved site	7	15	11	5	2	8	6	13	11	137.546	254.104	209.672	70.3878	33.7024	151.509	111.917	187.666	218.571	9.29625	10.8787	-0.23005	0.71729	0.98984	FALSE	4.76143	11.1989	-1.2597	0.095292	0.98087	FALSE	4.89952	9.89347	-1.0342	0.19043	0.99144	FALSE
novel_circ_0009565	2	5975907	6010428	+	34521	221	ENSMUSG00000043241;	exon:6003545-6003653,exon:6010315-6010428	CON_3,HFD_1	3,3	20,17	Upf2	Up-frameshift suppressor 2, C-terminal||MIF4G-like, type 3||Armadillo-type fold||Nonsense-mediated mRNA decay protein Nmd2/UPF2||MIF4G-like domain superfamily	0	0	3	3	0	0	0	0	0	0	0	57.1832	42.2327	0	0	0	0	0	0	1.02501	-2.5603	0.52141	0.98499	FALSE	0.801163	1.05847	-0.37278	0.91615	0.99903	FALSE	0.836375	0	2.1951	0.58373	0.99144	FALSE
novel_circ_0009564	2	59758464	59772539	+	14075	420	ENSMUSG00000035168;	exon:59758465-59758569,exon:59771132-59771262,exon:59772353-59772539	CON_1,CON_2,CON_3,HFD_1,HFD_2,HFD_3,HSD_1,HSD_2,HSD_3	9,11,7,15,10,9,2,10,12	15,30,17,20,35,22,16,36,18	Tanc1	Ankyrin repeat-containing domain superfamily||Tetratricopeptide repeat-containing domain||Ankyrin repeat-containing domain||Tetratricopeptide repeat||Ankyrin repeat||Tetratricopeptide-like helical domain superfamily	9	11	7	15	10	9	2	10	12	176.845	186.343	133.427	211.164	168.512	170.448	37.3058	144.358	238.441	7.49727	8.99668	-0.26512	0.72163	0.99055	FALSE	10.3184	9.25488	0.16066	0.79706	0.99903	FALSE	10.654	7.96085	0.42376	0.54465	0.99144	FALSE
novel_circ_0006391	18	58148990	58153957	-	4967	322	ENSMUSG00000024598;	exon:58148991-58149116,exon:58153760-58153957	CON_1	2	7	Fbn2	EGF-type aspartate/asparagine hydroxylation site||EGF-like, conserved site||Complement Clr-like EGF domain||Growth factor receptor cysteine-rich domain superfamily||TB domain||TGF-beta binding (TB) domain superfamily||EGF-like calcium-binding, conserved site||EGF-like calcium-binding domain||EGF-like domain||Fibrillin 1, unique N-terminal domain	2	0	0	0	0	0	0	0	0	39.2989	0	0	0	0	0	0	0	0	0	0.71555	-2.0323	0.61412	0.98499	FALSE	0	0.733817	-2.0934	0.60355	0.98087	FALSE	0	0	NA	NA	NA	NA
novel_circ_0006390	18	58035272	58040199	-	4927	256	ENSMUSG00000024598;	exon:58035273-58035404,exon:58040074-58040199	CON_1	3	14	Fbn2	EGF-type aspartate/asparagine hydroxylation site||EGF-like, conserved site||Complement Clr-like EGF domain||Growth factor receptor cysteine-rich domain superfamily||TB domain||TGF-beta binding (TB) domain superfamily||EGF-like calcium-binding, conserved site||EGF-like calcium-binding domain||EGF-like domain||Fibrillin 1, unique N-terminal domain	3	0	0	0	0	0	0	0	0	58.9484	0	0	0	0	0	0	0	0	0	1.07332	-2.6209	0.51123	0.98499	FALSE	0	1.10073	-2.6818	0.50149	0.98087	FALSE	0	0	NA	NA	NA	NA
novel_circ_0009561	2	5973468	5983095	+	9627	263	ENSMUSG00000043241;	exon:5973469-5973629,exon:5982992-5983095	CON_3,HFD_1,HSD_1	2,2,5	39,27,12	Upf2	Up-frameshift suppressor 2, C-terminal||MIF4G-like, type 3||Armadillo-type fold||Nonsense-mediated mRNA decay protein Nmd2/UPF2||MIF4G-like domain superfamily	0	0	2	2	0	0	5	0	0	0	0	38.1221	28.1551	0	0	93.2644	0	0	1.68173	0.683342	1.297	0.69603	0.98499	FALSE	0.534108	0.705644	-0.36514	0.9244	0.99903	FALSE	0.557583	1.82024	-1.6623	0.62097	0.99144	FALSE
novel_circ_0008483	2	104973166	104985108	+	11942	366	ENSMUSG00000045106;	exon:104973167-104973295,exon:104975556-104975660,exon:104984974-104985108	HSD_1	4	0	Ccdc73	Coiled-coil domain-containing protein 73	0	0	0	0	0	0	4	0	0	0	0	0	0	0	0	74.6116	0	0	1.34538	0	2.8571	0.47162	0.98499	FALSE	0	0	NA	NA	NA	NA	0	1.45619	-3.0412	0.44345	0.99144	FALSE
novel_circ_0009569	2	5979773	6010428	+	30655	262	ENSMUSG00000043241;	exon:5979774-5979923,exon:6010315-6010428	CON_1,CON_2,CON_3,HFD_2,HFD_3	2,3,2,5,3	20,28,16,20,20	Upf2	Up-frameshift suppressor 2, C-terminal||MIF4G-like, type 3||Armadillo-type fold||Nonsense-mediated mRNA decay protein Nmd2/UPF2||MIF4G-like domain superfamily	2	3	2	0	5	3	0	0	0	39.2989	50.8208	38.1221	0	84.2559	56.816	0	0	0	0	2.32207	-3.7433	0.20641	0.98499	FALSE	2.63283	2.38936	0.11973	0.94041	0.99903	FALSE	2.7011	0	3.8626	0.21149	0.99144	FALSE
novel_circ_0009568	2	5979773	5988472	+	8699	337	ENSMUSG00000043241;	exon:5979774-5979923,exon:5982992-5983095,exon:5988387-5988472	HFD_2	2	23	Upf2	Up-frameshift suppressor 2, C-terminal||MIF4G-like, type 3||Armadillo-type fold||Nonsense-mediated mRNA decay protein Nmd2/UPF2||MIF4G-like domain superfamily	0	0	0	0	2	0	0	0	0	0	0	0	0	33.7024	0	0	0	0	0	0	NA	NA	NA	NA	0.634361	0	1.7334	0.66753	0.98087	FALSE	0.652478	0	1.8143	0.65303	0.99144	FALSE
novel_circ_0000148	10	12636595	12641044	-	4449	322	ENSMUSG00000019820;	exon:12636596-12636801,exon:12640927-12641044	CON_1,CON_2,HFD_1,HFD_2,HSD_2,HSD_3	5,4,8,3,3,2	41,82,80,65,103,93	Utrn	Actinin-type actin-binding domain, conserved site||Spectrin repeat||-||CH domain superfamily||EF-hand domain pair||EF-hand domain, type 1||WW domain superfamily||Spectrin/alpha-actinin||Zinc finger, ZZ-type||Calponin homology domain||WW domain||Dystrophin/utrophin||EF-hand domain, type 2	5	4	0	8	3	0	0	3	2	98.2473	67.761	0	112.621	50.5536	0	0	43.3075	39.7401	1.49302	3.01978	-1.0012	0.5927	0.98499	FALSE	3.08798	3.10107	0.018367	0.99037	0.99903	FALSE	3.20905	1.58082	1.0206	0.57233	0.99144	FALSE
novel_circ_0008480	2	104776171	104780260	-	4089	217	ENSMUSG00000074994;	exon:104776172-104776389	CON_1,CON_2,HFD_1,HFD_2,HFD_3,HSD_1,HSD_2,HSD_3	4,18,6,7,12,10,11,19	14,19,18,33,23,7,17,23	Qser1	Domain of unknown function DUF4211	4	18	0	6	7	12	10	11	19	78.5978	304.925	0	84.4654	117.958	227.264	186.529	158.794	377.531	12.88	6.9702	0.87422	0.49604	0.98499	FALSE	8.01028	7.16701	0.14618	0.91193	0.99903	FALSE	8.23605	13.7317	-0.74597	0.24665	0.99144	FALSE
novel_circ_0014429	7	56113044	56114880	+	1836	406	ENSMUSG00000030451;	exon:56113045-56113273,exon:56114702-56114880	CON_2,HFD_1,HFD_2,HSD_2,HSD_3	2,4,4,3,4	99,36,69,74,66	Herc2	Mib/herc2 domain superfamily||Ribosomal protein L2, domain 2||Cytochrome b5-like heme/steroid binding domain superfamily||HERC2, APC10 domain||Cytochrome b5-like heme/steroid binding domain||HECT, E3 ligase catalytic domain||HERC2, zinc finger, ZZ-type||Mib-herc2||Zinc finger, ZZ-type||HECT domain||-||APC10/DOC domain||Regulator of chromosome condensation, RCC1||Galactose-binding-like domain supe…	0	2	0	4	4	0	0	3	4	0	33.8805	0	56.3103	67.4047	0	0	43.3075	79.4802	2.18596	0.615455	1.7973	0.52023	0.98499	FALSE	2.33694	0.633264	1.8578	0.49431	0.98087	FALSE	2.42012	2.31708	0.074012	0.96705	0.99761	FALSE
novel_circ_0014425	7	56067983	56072430	+	4447	251	ENSMUSG00000030451;	exon:56067984-56068098,exon:56072293-56072430	CON_1,CON_2,CON_3,HFD_1,HFD_2,HFD_3,HSD_1,HSD_2,HSD_3	12,24,12,14,14,19,7,25,21	40,110,41,56,60,56,59,95,68	Herc2	Mib/herc2 domain superfamily||Ribosomal protein L2, domain 2||Cytochrome b5-like heme/steroid binding domain superfamily||HERC2, APC10 domain||Cytochrome b5-like heme/steroid binding domain||HECT, E3 ligase catalytic domain||HERC2, zinc finger, ZZ-type||Mib-herc2||Zinc finger, ZZ-type||HECT domain||-||APC10/DOC domain||Regulator of chromosome condensation, RCC1||Galactose-binding-like domain supe…	12	24	12	14	14	19	7	25	21	235.793	406.566	228.733	197.086	235.917	359.835	130.57	360.896	417.271	16.2976	15.7788	0.044979	0.93353	0.9996	FALSE	14.8098	16.2359	-0.15248	0.76772	0.99692	FALSE	15.2465	17.317	-0.20065	0.70534	0.99614	FALSE
novel_circ_0014426	7	56067983	56085208	+	17225	114	ENSMUSG00000030451;	exon:56067984-56068098	HFD_1	2	51	Herc2	Mib/herc2 domain superfamily||Ribosomal protein L2, domain 2||Cytochrome b5-like heme/steroid binding domain superfamily||HERC2, APC10 domain||Cytochrome b5-like heme/steroid binding domain||HECT, E3 ligase catalytic domain||HERC2, zinc finger, ZZ-type||Mib-herc2||Zinc finger, ZZ-type||HECT domain||-||APC10/DOC domain||Regulator of chromosome condensation, RCC1||Galactose-binding-like domain supe…	0	0	0	2	0	0	0	0	0	0	0	0	28.1551	0	0	0	0	0	0	0	NA	NA	NA	NA	0.534108	0	1.5189	0.70802	0.98087	FALSE	0.557583	0	1.6184	0.68858	0.99144	FALSE
novel_circ_0013589	6	83516267	83520817	-	4550	533	ENSMUSG00000059430;	exon:83516268-83516449,exon:83519768-83519959,exon:83520656-83520817	HSD_2	3	2067	Actg2	Actin, conserved site||Actin/actin-like conserved site||Actin family	0	0	0	0	0	0	0	3	0	0	0	0	0	0	0	0	43.3075	0	0.800071	0	2.1371	0.59397	0.98499	FALSE	0	0	NA	NA	NA	NA	0	0.844554	-2.2881	0.56827	0.99144	FALSE
novel_circ_0014420	7	55904188	55908564	+	4376	383	ENSMUSG00000030447;	exon:55904189-55904265,exon:55904374-55904482,exon:55908365-55908564	CON_1,CON_2,HFD_1,HSD_3	2,4,5,2	34,102,85,85	Cyfip1	Cytoplasmic FMR1-interacting||Protein of unknown function DUF1394	2	4	0	5	0	0	0	0	2	39.2989	67.761	0	70.3878	0	0	0	0	39.7401	0.692946	1.94646	-1.5244	0.59559	0.98499	FALSE	1.33527	2.00034	-0.55789	0.82367	0.99903	FALSE	1.39396	0.736264	0.95594	0.78481	0.99761	FALSE
novel_circ_0014423	7	56050855	56072430	+	21575	343	ENSMUSG00000030451;	exon:56050856-56050948,exon:56067984-56068098,exon:56072293-56072430	CON_1,CON_2,HFD_1,HSD_2,HSD_3	5,2,2,8,3	44,100,53,93,61	Herc2	Mib/herc2 domain superfamily||Ribosomal protein L2, domain 2||Cytochrome b5-like heme/steroid binding domain superfamily||HERC2, APC10 domain||Cytochrome b5-like heme/steroid binding domain||HECT, E3 ligase catalytic domain||HERC2, zinc finger, ZZ-type||Mib-herc2||Zinc finger, ZZ-type||HECT domain||-||APC10/DOC domain||Regulator of chromosome condensation, RCC1||Galactose-binding-like domain supe…	5	2	0	2	0	0	0	8	3	98.2473	33.8805	0	28.1551	0	0	0	115.487	59.6101	3.17294	2.40433	0.42482	0.79891	0.9996	FALSE	0.534108	2.46781	-2.1478	0.43111	0.98087	FALSE	0.557583	3.35654	-2.5329	0.27341	0.99144	FALSE
novel_circ_0016637	X	140677995	140693162	+	15167	95	ENSMUSG00000000266;	exon:140693067-140693162	CON_1,CON_3,HFD_2,HFD_3,HSD_1	4,8,2,5,3	9,1,9,10,9	Mid2	COS domain||SPRY domain||Midline-1, COS domain||Concanavalin A-like lectin/glucanase domain superfamily||Fibronectin type III||B-box-type zinc finger||Fibronectin type III superfamily||Zinc finger, RING-type||Butyrophylin-like, SPRY domain||B-box, C-terminal||RING-type zinc-finger, LisH dimerisation motif||Zinc finger, RING/FYVE/PHD-type||B30.2/SPRY domain||TRIM1, PRY/SPRY domain||Immunoglobulin-…	4	0	8	0	2	5	3	0	0	78.5978	0	152.488	0	33.7024	94.6934	55.9587	0	0	1.00904	4.16447	-2.0603	0.41415	0.98499	FALSE	2.37923	4.29021	-0.87502	0.56003	0.98087	FALSE	2.43566	1.09214	1.1683	0.63415	0.99144	FALSE
novel_circ_0001022	11	12369593	12378359	-	8766	210	ENSMUSG00000020173;	exon:12378149-12378359	HSD_2	5	30	Cobl	Cordon-bleu, ubiquitin-like domain||WH2 domain||Protein cordon-bleu-like||-||Ubiquitin-like domain superfamily	0	0	0	0	0	0	0	5	0	0	0	0	0	0	0	0	72.1792	0	1.33345	0	2.8653	0.47032	0.98499	FALSE	0	0	NA	NA	NA	NA	0	1.40759	-3.0156	0.44743	0.99144	FALSE
novel_circ_0001023	11	16862945	16872936	+	9991	365	ENSMUSG00000020122;	exon:16862946-16863080,exon:16867231-16867299,exon:16871802-16871875,exon:16872846-16872936	CON_3,HFD_1,HFD_3,HSD_3	3,3,4,3	38,60,54,73	Egfr	Receptor L-domain||Tyrosine-protein kinase, active site||Growth factor receptor domain 4||Protein kinase, ATP binding site||Protein kinase domain||Growth factor receptor cysteine-rich domain superfamily||Receptor L-domain superfamily||Tyrosine-protein kinase, catalytic domain||Furin-like repeat||Protein kinase-like domain superfamily||Serine-threonine/tyrosine-protein kinase, catalytic domain||Ty…	0	0	3	3	0	4	0	0	3	0	0	57.1832	42.2327	0	75.7547	0	0	59.6101	1.03942	1.02501	0.008378	0.99807	0.9996	FALSE	2.19706	1.05847	1.0563	0.67909	0.98087	FALSE	2.26292	1.1044	1.0574	0.67394	0.99144	FALSE
novel_circ_0001752	11	86784878	86789349	-	4471	262	ENSMUSG00000018425;	exon:86785757-86785837,exon:86789167-86789349	CON_1	6	21	Dhx40	Helicase-associated domain||Domain of unknown function DUF1605||Helicase, C-terminal||DNA/RNA helicase, ATP-dependent, DEAH-box type, conserved site||P-loop containing nucleoside triphosphate hydrolase||Helicase superfamily 1/2, ATP-binding domain||DEAD/DEAH box helicase domain	6	0	0	0	0	0	0	0	0	117.897	0	0	0	0	0	0	0	0	0	2.14665	-3.6243	0.33279	0.98499	FALSE	0	2.20145	-3.6848	0.31809	0.98087	FALSE	0	0	NA	NA	NA	NA
novel_circ_0001021	11	12365104	12378359	-	13255	381	ENSMUSG00000020173;	exon:12365105-12365179,exon:12369594-12369691,exon:12378149-12378359	CON_1,HFD_2,HFD_3,HSD_2,HSD_3	5,5,2,4,4	9,16,21,33,27	Cobl	Cordon-bleu, ubiquitin-like domain||WH2 domain||Protein cordon-bleu-like||-||Ubiquitin-like domain superfamily	5	0	0	0	5	2	0	4	4	98.2473	0	0	0	84.2559	37.8774	0	57.7434	79.4802	2.45265	1.78887	0.47404	0.82413	0.9996	FALSE	2.28385	1.83454	0.3215	0.8828	0.99903	FALSE	2.34447	2.5986	-0.16652	0.92512	0.99761	FALSE
novel_circ_0001026	11	17192956	17194853	+	1897	176	ENSMUSG00000033953;ENSMUSG00000078970;	exon:17192957-17193133	HSD_2	3	52	Ppp3r1;Wdr92	-	0	0	0	0	0	0	0	3	0	0	0	0	0	0	0	0	43.3075	0	0.800071	0	2.1371	0.59397	0.98499	FALSE	0	0	NA	NA	NA	NA	0	0.844554	-2.2881	0.56827	0.99144	FALSE
novel_circ_0001755	11	86797622	86806627	-	9005	167	ENSMUSG00000018425;	exon:86806460-86806627	HFD_2	4	48	Dhx40	Helicase-associated domain||Domain of unknown function DUF1605||Helicase, C-terminal||DNA/RNA helicase, ATP-dependent, DEAH-box type, conserved site||P-loop containing nucleoside triphosphate hydrolase||Helicase superfamily 1/2, ATP-binding domain||DEAD/DEAH box helicase domain	0	0	0	0	4	0	0	0	0	0	0	0	0	67.4047	0	0	0	0	0	0	NA	NA	NA	NA	1.26872	0	2.7352	0.49101	0.98087	FALSE	1.30496	0	2.8159	0.47832	0.99144	FALSE
novel_circ_0001024	11	16881463	16883613	+	2150	247	ENSMUSG00000020122;	exon:16881464-16881554,exon:16883456-16883613	CON_1,CON_2,CON_3,HFD_1,HFD_2,HFD_3,HSD_1,HSD_2,HSD_3	7,12,5,11,11,7,7,9,10	28,68,42,45,61,51,36,66,34	Egfr	Receptor L-domain||Tyrosine-protein kinase, active site||Growth factor receptor domain 4||Protein kinase, ATP binding site||Protein kinase domain||Growth factor receptor cysteine-rich domain superfamily||Receptor L-domain superfamily||Tyrosine-protein kinase, catalytic domain||Furin-like repeat||Protein kinase-like domain superfamily||Serine-threonine/tyrosine-protein kinase, catalytic domain||Ty…	7	12	5	11	11	7	7	9	10	137.546	203.283	95.3053	154.853	185.363	132.571	130.57	129.923	198.7	8.21936	7.90551	0.043384	0.95142	0.9996	FALSE	8.8694	8.13205	0.11978	0.86081	0.99903	FALSE	9.15179	8.76331	0.07167	0.91401	0.99761	FALSE
novel_circ_0001757	11	87041787	87059560	-	17773	340	ENSMUSG00000061666;	exon:87041788-87041921,exon:87045127-87045216,exon:87045756-87045874	HFD_2	2	5	Gdpd1	Glycerophosphodiester phosphodiesterase domain||PLC-like phosphodiesterase, TIM beta/alpha-barrel domain superfamily	0	0	0	0	2	0	0	0	0	0	0	0	0	33.7024	0	0	0	0	0	0	NA	NA	NA	NA	0.634361	0	1.7334	0.66753	0.98087	FALSE	0.652478	0	1.8143	0.65303	0.99144	FALSE
novel_circ_0001759	11	87143126	87149363	+	6237	399	ENSMUSG00000018548;	exon:87143127-87143214,exon:87145464-87145586,exon:87146934-87147057,exon:87149296-87149363	CON_2,HFD_1,HSD_1,HSD_3	2,3,3,6	11,16,7,17	Trim37	TRIM37, MATH domain||Zinc finger, RING/FYVE/PHD-type||TRAF-like||B-box-type zinc finger||Zinc finger, RING-type||MATH/TRAF domain||B-box, C-terminal||-	0	2	0	3	0	0	3	0	6	0	33.8805	0	42.2327	0	0	55.9587	0	119.22	3.08788	0.615455	2.2759	0.34169	0.98499	FALSE	0.801163	0.633264	0.34413	0.92696	0.99903	FALSE	0.836375	3.30093	-1.9146	0.38365	0.99144	FALSE
novel_circ_0004509	15	73343132	73365195	-	22063	380	ENSMUSG00000022607;	exon:73343133-73343359,exon:73365041-73365195	HSD_1,HSD_2	5,7	37,67	Ptk2	Protein kinase domain||Protein kinase, ATP binding site||Tyrosine-protein kinase, active site||Tyrosine-protein kinase, catalytic domain||FERM/acyl-CoA-binding protein superfamily||FERM superfamily, second domain||Serine-threonine/tyrosine-protein kinase, catalytic domain||Focal adhesion kinase, targeting (FAT) domain||FERM domain||FAK1/PYK2, FERM domain C-lobe||Ubiquitin-like domain superfamily|…	0	0	0	0	0	0	5	7	0	0	0	0	0	0	0	93.2644	101.051	0	3.54856	0	4.2652	0.20623	0.98499	FALSE	0	0	NA	NA	NA	NA	0	3.79086	-4.4315	0.18942	0.99144	FALSE
novel_circ_0016574	X	113116015	113116430	-	415	414	ENSMUSG00000025531;	exon:113116016-113116430	CON_1,HFD_1	5,3	9,18	Chm	FAD/NAD(P)-binding domain superfamily||Rab protein geranylgeranyltransferase component A||GDP dissociation inhibitor	5	0	0	3	0	0	0	0	0	98.2473	0	0	42.2327	0	0	0	0	0	0	1.78887	-3.3609	0.39563	0.98499	FALSE	0.801163	1.83454	-1.1567	0.714	0.98254	FALSE	0.836375	0	2.1951	0.58373	0.99144	FALSE
novel_circ_0003537	14	122950488	122978286	-	27798	212	ENSMUSG00000041594;	exon:122978074-122978286	CON_3	3	29	Tmtc4	Tetratricopeptide repeat||Tetratricopeptide-like helical domain superfamily||-||Domain of unknown function DUF1736||Tetratricopeptide repeat-containing domain||Tetratricopeptide repeat 1	0	0	3	0	0	0	0	0	0	0	0	57.1832	0	0	0	0	0	0	0	1.02501	-2.5603	0.52141	0.98499	FALSE	0	1.05847	-2.6303	0.51006	0.98087	FALSE	0	0	NA	NA	NA	NA
novel_circ_0016576	X	11523185	11525428	-	2243	407	n/a	intergenic_region:11523186-11523312,intergenic_region:11525147-11525428	HFD_2	3	0	--	-	0	0	0	0	3	0	0	0	0	0	0	0	0	50.5536	0	0	0	0	0	0	NA	NA	NA	NA	0.951542	0	2.3196	0.5613	0.98087	FALSE	0.978717	0	2.4003	0.54776	0.99144	FALSE
novel_circ_0016577	X	11523851	11525428	-	1577	183	n/a	intergenic_region:11523852-11524035	CON_3,HFD_1,HFD_2,HFD_3,HSD_1	2,3,7,4,2	3,2,1,0,0	--	-	0	0	2	3	7	4	2	0	0	0	0	38.1221	42.2327	117.958	75.7547	37.3058	0	0	0.672692	0.683342	-0.031254	0.99357	0.9996	FALSE	4.41732	0.705644	2.6587	0.13789	0.98087	FALSE	4.54659	0.728095	2.6987	0.1293	0.99144	FALSE
novel_circ_0003532	14	122690098	122714125	+	24027	355	ENSMUSG00000041650;	exon:122690099-122690167,exon:122692180-122692255,exon:122701055-122701165,exon:122714023-122714125	HFD_2,HFD_3,HSD_3	4,2,9	17,17,7	Pcca	Rudiment single hybrid motif||Pre-ATP-grasp domain superfamily||ATP-grasp fold||ATP-grasp fold, subdomain 1||Biotin/lipoyl attachment||Biotin carboxylase, C-terminal||Biotin carboxylase-like, N-terminal domain||Biotin-binding site||Carbamoyl-phosphate synthetase large subunit-like, ATP-binding domain||Single hybrid motif||-||Biotin carboxylation domain||Propionyl-coenzyme A carboxylase, BT domain	0	0	0	0	4	2	0	0	9	0	0	0	0	67.4047	37.8774	0	0	178.83	3.11826	0	4.0718	0.30062	0.98499	FALSE	1.96667	0	3.3647	0.32881	0.98087	FALSE	2.01823	3.31319	-0.71425	0.80463	0.99761	FALSE
novel_circ_0003530	14	122650251	122668671	+	18420	424	ENSMUSG00000041650;	exon:122650252-122650330,exon:122658678-122658780,exon:122664254-122664348,exon:122668521-122668671	HFD_2,HFD_3	3,2	15,20	Pcca	Rudiment single hybrid motif||Pre-ATP-grasp domain superfamily||ATP-grasp fold||ATP-grasp fold, subdomain 1||Biotin/lipoyl attachment||Biotin carboxylase, C-terminal||Biotin carboxylase-like, N-terminal domain||Biotin-binding site||Carbamoyl-phosphate synthetase large subunit-like, ATP-binding domain||Single hybrid motif||-||Biotin carboxylation domain||Propionyl-coenzyme A carboxylase, BT domain	0	0	0	0	3	2	0	0	0	0	0	0	0	50.5536	37.8774	0	0	0	0	0	NA	NA	NA	NA	1.64949	0	3.1099	0.38779	0.98087	FALSE	1.69199	0	3.1873	0.39032	0.99144	FALSE
novel_circ_0003531	14	122684881	122714125	+	29244	319	ENSMUSG00000041650;	exon:122684882-122685025,exon:122686103-122686177,exon:122714023-122714125	HSD_1	3	14	Pcca	Rudiment single hybrid motif||Pre-ATP-grasp domain superfamily||ATP-grasp fold||ATP-grasp fold, subdomain 1||Biotin/lipoyl attachment||Biotin carboxylase, C-terminal||Biotin carboxylase-like, N-terminal domain||Biotin-binding site||Carbamoyl-phosphate synthetase large subunit-like, ATP-binding domain||Single hybrid motif||-||Biotin carboxylation domain||Propionyl-coenzyme A carboxylase, BT domain	0	0	0	0	0	0	3	0	0	0	0	0	0	0	0	55.9587	0	0	1.00904	0	2.4402	0.54079	0.98499	FALSE	0	0	NA	NA	NA	NA	0	1.09214	-2.6239	0.51065	0.99144	FALSE
novel_circ_0016578	X	12040384	12041668	-	1284	311	ENSMUSG00000040363;	exon:12040385-12040530,exon:12041502-12041668	CON_1,CON_3,HFD_1,HFD_2,HSD_1,HSD_3	6,5,7,3,3,4	14,12,12,16,3,8	Bcor	PCGF Ub-like fold discriminator superfamily||Ankyrin repeat||-||Ankyrin repeat-containing domain superfamily||BCL-6 corepressor, non-ankyrin-repeat domain||BCL-6 corepressor, PCGF1 binding domain||Ankyrin repeat-containing domain	6	0	5	7	3	0	3	0	4	117.897	0	95.3053	98.543	50.5536	0	55.9587	0	79.4802	2.39493	3.855	-0.70328	0.65167	0.98499	FALSE	2.82092	3.96556	-0.45346	0.75366	0.99354	FALSE	2.93026	2.56467	0.23611	0.88716	0.99761	FALSE
novel_circ_0005486	17	26634416	26641704	+	7288	386	ENSMUSG00000001576;	exon:26634417-26634521,exon:26635986-26636046,exon:26638743-26638843,exon:26641582-26641704	CON_2,HSD_1,HSD_2	2,5,7	234192345	Ergic1	Endoplasmic reticulum vesicle transporter, N-terminal||Endoplasmic reticulum vesicle transporter, C-terminal||-	0	2	0	0	0	0	5	7	0	0	33.8805	0	0	0	0	93.2644	101.051	0	3.54856	0.615455	2.4891	0.25991	0.98499	FALSE	0	0.633264	-1.9087	0.63725	0.98087	FALSE	0	3.79086	-4.4315	0.18942	0.99144	FALSE
novel_circ_0002220	12	31927345	31944012	-	16667	183	ENSMUSG00000002996;	exon:31943829-31944012	HFD_3	4	104	Hbp1	Ataxin, AXH domain||Ataxin, AXH domain superfamily||HMG box-containing protein 1||High mobility group box domain||High mobility group box domain superfamily	0	0	0	0	0	4	0	0	0	0	0	0	0	0	75.7547	0	0	0	0	0	NA	NA	NA	NA	1.3959	0	2.864	0.47022	0.98087	FALSE	1.42654	0	2.9359	0.4592	0.99144	FALSE
novel_circ_0002222	12	3252611	3264749	-	12138	388	ENSMUSG00000020671;	exon:3252612-3252713,exon:3253269-3253358,exon:3256867-3257005,exon:3264689-3264749	CON_1,CON_2,HFD_1,HFD_2,HFD_3,HSD_1,HSD_2,HSD_3	3,3,10,3,7,3,11,5	60,102,79,70,64,38,96,93	Rab10	Small GTP-binding protein domain||P-loop containing nucleoside triphosphate hydrolase||Small GTPase	3	3	0	10	3	7	3	11	5	58.9484	50.8208	0	140.776	50.5536	132.571	55.9587	158.794	99.3502	5.675	1.99651	1.5155	0.22335	0.98499	FALSE	6.06491	2.05062	1.5636	0.18773	0.98087	FALSE	6.26308	6.0295	0.039368	0.9634	0.99761	FALSE
novel_circ_0002224	12	32830166	32835030	+	4864	317	ENSMUSG00000020572;	exon:32830167-32830253,exon:32833032-32833135,exon:32834902-32835030	HFD_3	2	117	Nampt	Aldolase-type TIM barrel||Nicotinate/nicotinamide phosphoribosyltransferase||-||Nicotinate phosphoribosyltransferase-like, C-terminal||Nicotinamide phosphoribosyl transferase||Nicotinamide phosphoribosyltransferase, N-terminal domain	0	0	0	0	0	2	0	0	0	0	0	0	0	0	37.8774	0	0	0	0	0	NA	NA	NA	NA	0.697949	0	1.854	0.64509	0.98087	FALSE	0.713271	0	1.9267	0.63226	0.99144	FALSE
novel_circ_0002227	12	34215010	34221259	-	6249	152	ENSMUSG00000004698;	exon:34215011-34215108,exon:34221204-34221259	CON_1,CON_2,CON_3,HFD_2,HFD_3,HSD_1	5,3,4,4,5,5	2,3,2,1,2,0	Hdac9	Histone deacetylase domain superfamily||Histone deacetylase family||Histone deacetylase domain||-||Ureohydrolase domain superfamily||Histone deacetylase, glutamine rich N-terminal domain||Histone deacetylase class II, eukaryotic	5	3	4	0	4	5	5	0	0	98.2473	50.8208	76.2442	0	67.4047	94.6934	93.2644	0	0	1.68173	4.07874	-1.3014	0.42141	0.98499	FALSE	3.0136	4.19573	-0.50345	0.69035	0.98087	FALSE	3.08813	1.82024	0.7681	0.77445	0.99761	FALSE
novel_circ_0002226	12	3387551	3390554	+	3003	457	ENSMUSG00000020668;	exon:3387552-3387653,exon:3388135-3388257,exon:3389623-3389741,exon:3390438-3390554	CON_3	3	13	Kif3c	Kinesin motor domain, conserved site||Kinesin-like protein||P-loop containing nucleoside triphosphate hydrolase||Kinesin motor domain	0	0	3	0	0	0	0	0	0	0	0	57.1832	0	0	0	0	0	0	0	1.02501	-2.5603	0.52141	0.98499	FALSE	0	1.05847	-2.6303	0.51006	0.98087	FALSE	0	0	NA	NA	NA	NA
novel_circ_0002229	12	3442473	3469593	+	27120	115	ENSMUSG00000037486;	exon:3469478-3469593	CON_1,CON_2,CON_3,HFD_1,HSD_1,HSD_2	3,3,6,6,3,3	45,45,42,71,42,71	Asxl2	Protein ASX-like, PHD domain||-||ASX-like protein 2||Polycomb protein ASX/ASX-like||ASX homology domain||HB1/Asxl, restriction endonuclease HTH domain	3	3	6	6	0	0	3	3	0	58.9484	50.8208	114.366	84.4654	0	0	55.9587	43.3075	0	1.80911	4.04653	-1.1438	0.43137	0.98499	FALSE	1.60233	4.16755	-1.3193	0.40523	0.98087	FALSE	1.67275	1.9367	-0.19101	0.93607	0.99761	FALSE
novel_circ_0015398	8	91401806	91409841	+	8035	77	ENSMUSG00000055932;	exon:91401807-91401884	CON_1,CON_3,HFD_1,HFD_3,HSD_1	2,6,3,3,2	40,66,47,82,49	Fto	Alpha-ketoglutarate-dependent dioxygenase FTO||Alpha-ketoglutarate-dependent dioxygenase AlkB-like superfamily||Alpha-ketoglutarate-dependent dioxygenase FTO, C-terminal||FTO, C-terminal domain superfamily||Alpha-ketoglutarate-dependent dioxygenase FTO, catalytic domain	2	0	6	3	0	3	2	0	0	39.2989	0	114.366	42.2327	0	56.816	37.3058	0	0	0.672692	2.76558	-2.0625	0.41048	0.98499	FALSE	1.84809	2.85075	-0.61993	0.73354	0.98728	FALSE	1.90628	0.728095	1.4129	0.6256	0.99144	FALSE
novel_circ_0003289	13	8819862	8849669	-	29807	234	ENSMUSG00000021147;	exon:8819863-8819977,exon:8842730-8842806,exon:8844787-8844831	CON_1,HFD_1	2,4	10,30	Wdr37	WD40-repeat-containing domain superfamily||WD40-repeat-containing domain||WD40 repeat||-||WD40/YVTN repeat-like-containing domain superfamily||G-protein beta WD-40 repeat||WD40 repeat, conserved site	2	0	0	4	0	0	0	0	0	39.2989	0	0	56.3103	0	0	0	0	0	0	0.71555	-2.0323	0.61412	0.98499	FALSE	1.06822	0.733817	0.5748	0.87245	0.99903	FALSE	1.11517	0	2.6058	0.51284	0.99144	FALSE
novel_circ_0005551	17	32155957	32156407	-	450	185	ENSMUSG00000038146;	exon:32155958-32156143	CON_1,HFD_3	2,2	26,27	Notch3	EGF-like domain||Notch, NOD domain||Notch domain||Growth factor receptor cysteine-rich domain superfamily||EGF-like, conserved site||Notch||Domain of unknown function DUF3454, notch||Ankyrin repeat-containing domain||EGF-type aspartate/asparagine hydroxylation site||Neurogenic locus Notch 3||Ankyrin repeat||EGF-like calcium-binding domain||Notch, NODP domain||EGF-like calcium-binding, conserved s…	2	0	0	0	0	2	0	0	0	39.2989	0	0	0	0	37.8774	0	0	0	0	0.71555	-2.0323	0.61412	0.98499	FALSE	0.697949	0.733817	-0.083317	0.98238	0.99903	FALSE	0.713271	0	1.9267	0.63226	0.99144	FALSE
novel_circ_0003281	13	84272170	84294715	+	22545	156	ENSMUSG00000035762;	exon:84272171-84272327	HFD_1,HSD_1	5,4	7,7	Tmem161b	-||Transmembrane protein 161A/B	0	0	0	5	0	0	4	0	0	0	0	0	70.3878	0	0	74.6116	0	0	1.34538	0	2.8571	0.47162	0.98499	FALSE	1.33527	0	2.8242	0.47659	0.98087	FALSE	1.39396	1.45619	-0.032071	0.99161	0.99761	FALSE
novel_circ_0003285	13	8559103	8570574	+	11471	86	ENSMUSG00000052551;	exon:8559104-8559190	HFD_2	3	4	Adarb2	Adenosine deaminase/editase||Double-stranded RNA-binding domain||-	0	0	0	0	3	0	0	0	0	0	0	0	0	50.5536	0	0	0	0	0	0	NA	NA	NA	NA	0.951542	0	2.3196	0.5613	0.98087	FALSE	0.978717	0	2.4003	0.54776	0.99144	FALSE
novel_circ_0003286	13	8672404	8701731	+	29327	265	ENSMUSG00000052551;	exon:8672405-8672519,exon:8701580-8701731	HFD_2,HSD_2,HSD_3	3,3,2	10,1,8	Adarb2	Adenosine deaminase/editase||Double-stranded RNA-binding domain||-	0	0	0	0	3	0	0	3	2	0	0	0	0	50.5536	0	0	43.3075	39.7401	1.49302	0	3.0174	0.41881	0.98499	FALSE	0.951542	0	2.3196	0.5613	0.98087	FALSE	0.978717	1.58082	-0.70344	0.80941	0.99761	FALSE
novel_circ_0016145	9	64835285	64839144	+	3859	193	ENSMUSG00000053641;	exon:64835286-64835352,exon:64835954-64836081	HFD_2,HSD_2	3,3	39,34	Dennd4a	-||MABP domain||dDENN domain||Pentatricopeptide repeat||Tetratricopeptide-like helical domain superfamily||uDENN domain||cDENN domain||Tripartite DENN domain	0	0	0	0	3	0	0	3	0	0	0	0	0	50.5536	0	0	43.3075	0	0.800071	0	2.1371	0.59397	0.98499	FALSE	0.951542	0	2.3196	0.5613	0.98087	FALSE	0.978717	0.844554	0.18118	0.96071	0.99761	FALSE
novel_circ_0016144	9	64835285	64836081	+	796	271	ENSMUSG00000053641;	exon:64835286-64835352,exon:64835508-64835586,exon:64835954-64836081	CON_2,CON_3,HFD_1,HSD_3	3,4,3,3	32,29,48,50	Dennd4a	-||MABP domain||dDENN domain||Pentatricopeptide repeat||Tetratricopeptide-like helical domain superfamily||uDENN domain||cDENN domain||Tripartite DENN domain	0	3	4	3	0	0	0	0	3	0	50.8208	76.2442	42.2327	0	0	0	0	59.6101	1.03942	2.28987	-1.17	0.64065	0.98499	FALSE	0.801163	2.36118	-1.518	0.55859	0.98087	FALSE	0.836375	1.1044	-0.36565	0.91934	0.99761	FALSE
novel_circ_0016147	9	64835955	64839144	+	3191	458	ENSMUSG00000053641;	exon:64835954-64836081,exon:64838813-64839144	CON_1,CON_2,CON_3,HFD_1,HFD_2,HFD_3,HSD_1,HSD_2,HSD_3	13,15,12,16,12,12,14,6,16	37,25,18,54,45,30,33,39,34	Dennd4a	-||MABP domain||dDENN domain||Pentatricopeptide repeat||Tetratricopeptide-like helical domain superfamily||uDENN domain||cDENN domain||Tripartite DENN domain	13	15	12	16	12	12	14	6	16	255.443	254.104	228.733	225.241	202.214	227.264	261.14	86.6151	317.921	11.8526	13.367	-0.19644	0.73994	0.99414	FALSE	12.2667	13.7532	-0.16449	0.75904	0.99354	FALSE	12.6552	12.6759	0.022671	0.96947	0.99761	FALSE
novel_circ_0016146	9	64835285	64842689	+	7404	520	ENSMUSG00000053641;	exon:64835286-64835352,exon:64835508-64835586,exon:64835954-64836081,exon:64842440-64842689	CON_1,CON_2,CON_3,HFD_1,HFD_2,HFD_3,HSD_1,HSD_2,HSD_3	4,4,5,11,10,4,6,13,12	10,29,21,31,25,9,21,29,23	Dennd4a	-||MABP domain||dDENN domain||Pentatricopeptide repeat||Tetratricopeptide-like helical domain superfamily||uDENN domain||cDENN domain||Tripartite DENN domain	4	4	5	11	10	4	6	13	12	78.5978	67.761	95.3053	154.853	168.512	75.7547	111.917	187.666	238.441	9.64273	4.37037	1.1461	0.14707	0.98499	FALSE	7.5053	4.49827	0.75107	0.37183	0.98087	FALSE	7.75564	10.2616	-0.39433	0.56401	0.99144	FALSE
novel_circ_0016141	9	64725501	64728429	-	2928	468	ENSMUSG00000004771;	exon:64725502-64725582,exon:64726624-64726817,exon:64728234-64728429	CON_1,CON_2,CON_3,HFD_1,HFD_2,HFD_3,HSD_1,HSD_2,HSD_3	18,22,17,18,24,27,22,47,16	1.56251e+26	Rab11a	Small GTPase||P-loop containing nucleoside triphosphate hydrolase||Small GTP-binding protein domain	18	22	17	18	24	27	22	47	16	353.69	372.686	324.038	253.396	404.428	511.344	410.364	678.485	317.921	25.4776	19.0184	0.43623	0.32709	0.98499	FALSE	21.8416	19.5682	0.14432	0.74448	0.99209	FALSE	22.4771	27.1305	-0.29853	0.49442	0.99144	FALSE
novel_circ_0016143	9	64827522	64842689	+	15167	360	ENSMUSG00000053641;	intron:64827523-64827634,intron:64842440-64842689	HSD_2	2	21	Dennd4a	-||MABP domain||dDENN domain||Pentatricopeptide repeat||Tetratricopeptide-like helical domain superfamily||uDENN domain||cDENN domain||Tripartite DENN domain	0	0	0	0	0	0	0	2	0	0	0	0	0	0	0	0	28.8717	0	0.53338	0	1.5621	0.70028	0.98499	FALSE	0	0	NA	NA	NA	NA	0	0.563036	-1.7139	0.67182	0.99144	FALSE
novel_circ_0016142	9	64726623	64728429	-	1806	193	ENSMUSG00000004771;	exon:64726624-64726817	CON_3,HSD_2,HSD_3	2,6,2	216288221	Rab11a	Small GTPase||P-loop containing nucleoside triphosphate hydrolase||Small GTP-binding protein domain	0	0	2	0	0	0	0	6	2	0	0	38.1221	0	0	0	0	86.6151	39.7401	2.29309	0.683342	1.7635	0.51608	0.98499	FALSE	0	0.705644	-2.0441	0.61248	0.98087	FALSE	0	2.42537	-3.7925	0.24356	0.99144	FALSE
novel_circ_0016149	9	64838812	64842689	+	3877	249	ENSMUSG00000053641;	exon:64842440-64842689	CON_1,CON_3,HFD_2,HSD_2	4,4,5,6	30,31,55,45	Dennd4a	-||MABP domain||dDENN domain||Pentatricopeptide repeat||Tetratricopeptide-like helical domain superfamily||uDENN domain||cDENN domain||Tripartite DENN domain	4	0	4	0	5	0	0	6	0	78.5978	0	76.2442	0	84.2559	0	0	86.6151	0	1.60014	2.79778	-0.75821	0.71576	0.98984	FALSE	1.5859	2.87892	-0.85854	0.6754	0.98087	FALSE	1.63119	1.68911	-0.065305	0.98641	0.99761	FALSE
novel_circ_0016148	9	64835955	64839144	+	3189	456	ENSMUSG00000053641;	exon:64835956-64836081,exon:64838813-64839144	CON_2	2	27	Dennd4a	-||MABP domain||dDENN domain||Pentatricopeptide repeat||Tetratricopeptide-like helical domain superfamily||uDENN domain||cDENN domain||Tripartite DENN domain	0	2	0	0	0	0	0	0	0	0	33.8805	0	0	0	0	0	0	0	0	0.615455	-1.8435	0.6488	0.98499	FALSE	0	0.633264	-1.9087	0.63725	0.98087	FALSE	0	0	NA	NA	NA	NA
novel_circ_0015171	8	70405258	70409011	-	3753	116	ENSMUSG00000003575;	exon:70408895-70409011	CON_1,CON_2,HFD_1,HFD_2,HFD_3,HSD_2,HSD_3	2,2,4,2,4,3,7	5,21,4,14,4,2,9	Crtc1	Transducer of regulated CREB activity, C-terminal||Transducer of regulated CREB activity, middle domain||Transducer of regulated CREB activity, N-terminal||CREB-regulated transcription coactivator	2	2	0	4	2	4	0	3	7	39.2989	33.8805	0	56.3103	33.7024	75.7547	0	43.3075	139.09	3.22538	1.33101	1.2697	0.50319	0.98499	FALSE	3.09848	1.36708	1.1755	0.49341	0.98087	FALSE	3.19419	3.42148	-0.093301	0.94561	0.99761	FALSE
novel_circ_0015170	8	70333892	70334760	-	868	142	ENSMUSG00000058301;	exon:70334618-70334760	HFD_1	3	46	Upf1	DNA2/NAM7 helicase, AAA domain||Helicase/UvrB, N-terminal||RNA helicase UPF1, UPF2-interacting domain||Domain of unknown function DUF5599||DNA2/NAM7 helicase-like, AAA domain||P-loop containing nucleoside triphosphate hydrolase	0	0	0	3	0	0	0	0	0	0	0	0	42.2327	0	0	0	0	0	0	0	NA	NA	NA	NA	0.801163	0	2.0951	0.6011	0.98087	FALSE	0.836375	0	2.1951	0.58373	0.99144	FALSE
novel_circ_0015173	8	70764546	70765102	-	556	274	ENSMUSG00000031838;	exon:70764547-70764639,exon:70764920-70765102	HFD_2,HSD_1,HSD_3	4,6,3	283188235	--	-	0	0	0	0	4	0	6	0	3	0	0	0	0	67.4047	0	111.917	0	59.6101	3.05749	0	4.0411	0.16106	0.98499	FALSE	1.26872	0	2.7352	0.49101	0.98087	FALSE	1.30496	3.28868	-1.3269	0.51716	0.99144	FALSE
novel_circ_0015179	8	72197738	72198487	+	749	284	ENSMUSG00000062007;	exon:72197739-72197904,exon:72198368-72198487	HFD_3,HSD_2	5,15	11,19	Hsh2d	SH2 domain superfamily||Hematopoietic SH2 domain-containing protein||SH2 domain	0	0	0	0	0	5	0	15	0	0	0	0	0	0	94.6934	0	216.538	0	4.00035	0	4.4405	0.25824	0.98499	FALSE	1.74487	0	3.188	0.4192	0.98087	FALSE	1.78318	4.22277	-1.2577	0.74046	0.99761	FALSE
novel_circ_0015178	8	72138587	72146527	+	7940	75	ENSMUSG00000031799;	exon:72146452-72146527	HFD_2	6	460	Tpm4	Tropomyosin	0	0	0	0	6	0	0	0	0	0	0	0	0	101.107	0	0	0	0	0	0	NA	NA	NA	NA	1.90308	0	3.3208	0.38921	0.98087	FALSE	1.95743	0	3.4015	0.38849	0.99144	FALSE
novel_circ_0005559	17	32773504	32777527	-	4023	186	ENSMUSG00000024298;	exon:32777157-32777217,exon:32777401-32777527	CON_3,HFD_2,HSD_1,HSD_2	4,4,8,6	19,34,35,40	Zfp871	KRAB domain superfamily||Krueppel-associated box||Zinc finger C2H2-type||Zinc finger C2H2 superfamily	0	0	4	0	4	0	8	6	0	0	0	76.2442	0	67.4047	0	149.223	86.6151	0	4.29091	1.36668	1.6559	0.51834	0.98499	FALSE	1.26872	1.41129	-0.15351	0.96087	0.99903	FALSE	1.30496	4.60149	-1.823	0.47817	0.99144	FALSE
mmu_circ_0000257	11	50307469	50310867	-	3398	550	ENSMUSG00000020368;	exon:50307470-50307616,exon:50308788-50308929,exon:50310372-50310430,exon:50310794-50310867	CON_1,CON_2,CON_3,HFD_1,HFD_2,HFD_3,HSD_1,HSD_2,HSD_3	11,6,6,12,9,22,7,12,4	3.97808e+26	Canx	Calreticulin/calnexin||Concanavalin A-like lectin/glucanase domain superfamily||Calreticulin/calnexin, P domain superfamily||Calreticulin/calnexin, conserved site	11	6	6	12	9	22	7	12	4	216.144	101.642	114.366	168.931	151.661	416.651	130.57	173.23	79.4802	6.9406	7.83192	-0.15091	0.84272	0.9996	FALSE	13.7367	8.05272	0.76599	0.23987	0.98087	FALSE	14.1276	7.39907	0.90246	0.17158	0.99144	FALSE
mmu_circ_0000256	11	50299128	50301054	-	1926	373	ENSMUSG00000020368;	exon:50299129-50299344,exon:50300898-50301054	CON_1,CON_2,CON_3,HFD_1,HFD_2,HFD_3,HSD_1,HSD_2,HSD_3	16,21,12,17,18,22,19,21,9	1.6847e+26	Canx	Calreticulin/calnexin||Concanavalin A-like lectin/glucanase domain superfamily||Calreticulin/calnexin, P domain superfamily||Calreticulin/calnexin, conserved site	16	21	12	17	18	22	19	21	9	314.391	355.745	228.733	239.319	303.321	416.651	354.405	303.153	178.83	15.1093	16.2867	-0.10509	0.83738	0.9996	FALSE	17.9266	16.7537	0.083742	0.86138	0.99903	FALSE	18.4577	16.142	0.17957	0.71547	0.99614	FALSE
novel_circ_0008559	2	119153375	119154082	-	707	335	ENSMUSG00000070730;	exon:119153376-119153519,exon:119153890-119154082	CON_1,CON_2,HFD_1,HFD_2,HFD_3,HSD_1,HSD_2,HSD_3	5,9,9,5,5,4,7,3	113,165,115,95,119,111,104,111	Rmdn3	Tetratricopeptide-like helical domain superfamily||-	5	9	0	9	5	5	4	7	3	98.2473	152.462	0	126.698	84.2559	94.6934	74.6116	101.051	59.6101	4.25163	4.55842	-0.10005	0.92961	0.9996	FALSE	5.73426	4.68423	0.28618	0.77443	0.99773	FALSE	5.9235	4.53121	0.37994	0.67703	0.99144	FALSE
novel_circ_0008558	2	119118607	119127157	+	8550	231	ENSMUSG00000027323;	exon:119118608-119118745,exon:119127063-119127157	HSD_1	3	3	Rad51	DNA recombination and repair protein Rad51-like, C-terminal||-||DNA recombination and repair protein, RecA-like||DNA recombination and repair protein RecA, monomer-monomer interface||Rad51/DMC1/RadA||P-loop containing nucleoside triphosphate hydrolase||AAA+ ATPase domain||DNA recombination/repair protein Rad51||DNA repair Rad51/transcription factor NusA, alpha-helical||DNA recombination and repai…	0	0	0	0	0	0	3	0	0	0	0	0	0	0	0	55.9587	0	0	1.00904	0	2.4402	0.54079	0.98499	FALSE	0	0	NA	NA	NA	NA	0	1.09214	-2.6239	0.51065	0.99144	FALSE
novel_circ_0008888	2	148703060	148707023	-	3963	77	ENSMUSG00000027438;	exon:148706946-148707023	CON_2,HFD_2,HFD_3,HSD_3	5,9,3,8	5,3,3,1	Napb	-||NSF attachment protein||Tetratricopeptide-like helical domain superfamily	0	5	0	0	9	3	0	0	8	0	84.7013	0	0	151.661	56.816	0	0	158.96	2.77179	1.53864	0.83724	0.82636	0.9996	FALSE	3.90155	1.58316	1.2836	0.63392	0.98087	FALSE	4.00606	2.94505	0.44849	0.88	0.99761	FALSE
novel_circ_0008551	2	118915887	118921696	+	5809	91	ENSMUSG00000040007;	exon:118921605-118921696	HFD_3	5	45	Bahd1	Bromo adjacent homology (BAH) domain||-	0	0	0	0	0	5	0	0	0	0	0	0	0	0	94.6934	0	0	0	0	0	NA	NA	NA	NA	1.74487	0	3.188	0.4192	0.98087	FALSE	1.78318	0	3.2598	0.40976	0.99144	FALSE
novel_circ_0008550	2	118817863	118823786	+	5923	371	ENSMUSG00000027331;	exon:118817864-118817990,exon:118818835-118818882,exon:118823420-118823525,exon:118823693-118823786	CON_3	3	16	Knstrn	-||Small kinetochore-associated protein	0	0	3	0	0	0	0	0	0	0	0	57.1832	0	0	0	0	0	0	0	1.02501	-2.5603	0.52141	0.98499	FALSE	0	1.05847	-2.6303	0.51006	0.98087	FALSE	0	0	NA	NA	NA	NA
novel_circ_0008881	2	147024714	147025306	+	592	222	ENSMUSG00000027433;	exon:147024715-147024826,exon:147025195-147025306	CON_1,HFD_1,HFD_3,HSD_2,HSD_3	4,7,2,11,3	36,62,53,55,54	Xrn2	Putative 5-3 exonuclease||5'-3' exoribonuclease type 2||5'-3' exoribonuclease||Xrn1, helical domain	4	0	0	7	0	2	0	11	3	78.5978	0	0	98.543	0	37.8774	0	158.794	59.6101	3.97301	1.4311	1.4924	0.57325	0.98499	FALSE	2.56733	1.46763	0.83531	0.70465	0.98087	FALSE	2.66481	4.20109	-0.65855	0.65788	0.99144	FALSE
novel_circ_0008555	2	119076231	119081625	+	5394	320	ENSMUSG00000027326;	exon:119076232-119076370,exon:119076936-119077003,exon:119081510-119081625	CON_1,HFD_1,HFD_3,HSD_2	4,4,2,5	5,18,17,20	Knl1	Knl1, RWD C-terminal domain||Kinetochore scaffold 1	4	0	0	4	0	2	0	5	0	78.5978	0	0	56.3103	0	37.8774	0	72.1792	0	1.33345	1.4311	-0.080747	0.98328	0.9996	FALSE	1.76617	1.46763	0.28659	0.91105	0.99903	FALSE	1.82844	1.40759	0.34822	0.89201	0.99761	FALSE
novel_circ_0008886	2	148688003	148690983	+	2980	167	ENSMUSG00000027439;	exon:148688004-148688171	HSD_2	3	38	Gzf1	BTB/POZ domain||SKP1/BTB/POZ domain superfamily||Zinc finger C2H2-type||Zinc finger C2H2 superfamily	0	0	0	0	0	0	0	3	0	0	0	0	0	0	0	0	43.3075	0	0.800071	0	2.1371	0.59397	0.98499	FALSE	0	0	NA	NA	NA	NA	0	0.844554	-2.2881	0.56827	0.99144	FALSE
novel_circ_0008885	2	148686513	148690983	+	4470	276	ENSMUSG00000027439;	exon:148690707-148690983	CON_1,CON_2,CON_3,HFD_2,HFD_3,HSD_1,HSD_3	5,8,5,7,7,12,3	8,13,20,15,16,16,16	Gzf1	BTB/POZ domain||SKP1/BTB/POZ domain superfamily||Zinc finger C2H2-type||Zinc finger C2H2 superfamily	5	8	5	0	7	7	12	0	3	98.2473	135.522	95.3053	0	117.958	132.571	223.835	0	59.6101	5.07557	5.95905	-0.25013	0.84361	0.9996	FALSE	4.66309	6.13171	-0.42867	0.66667	0.98087	FALSE	4.78012	5.47297	-0.19462	0.92455	0.99761	FALSE
novel_circ_0008556	2	119076935	119081625	+	4690	280	ENSMUSG00000027326;	exon:119076936-119077003,exon:119077898-119077996,exon:119081510-119081625	CON_1,CON_2,CON_3,HFD_1,HFD_2,HFD_3,HSD_1,HSD_2,HSD_3	15,21,13,20,7,17,7,18,14	7,12,25,22,8,14,9,18,4	Knl1	Knl1, RWD C-terminal domain||Kinetochore scaffold 1	15	21	13	20	7	17	7	18	14	294.742	355.745	247.794	281.551	117.958	321.958	130.57	259.845	278.181	12.0055	16.2706	-0.4348	0.41965	0.98499	FALSE	13.4939	16.7396	-0.31404	0.55291	0.98087	FALSE	13.9223	12.7695	0.11809	0.83814	0.99761	FALSE
novel_circ_0000579	10	7691334	7691814	+	480	479	ENSMUSG00000040021;	exon:7691335-7691814	HFD_1	3	35	Lats1	Serine/threonine-protein kinase LATS1||AGC-kinase, C-terminal||Protein kinase-like domain superfamily||Ubiquitin-associated domain||UBA-like superfamily||Protein kinase domain||Serine/threonine-protein kinase, active site	0	0	0	3	0	0	0	0	0	0	0	0	42.2327	0	0	0	0	0	0	0	NA	NA	NA	NA	0.801163	0	2.0951	0.6011	0.98087	FALSE	0.836375	0	2.1951	0.58373	0.99144	FALSE
novel_circ_0000578	10	76797794	76800914	-	3120	270	ENSMUSG00000001120;	exon:76797795-76797911,exon:76800760-76800914	CON_1,HFD_1,HFD_2	2,2,2	3,5,5	Pcbp3	K Homology domain, type 1 superfamily||K Homology domain, type 1||K Homology domain||-	2	0	0	2	2	0	0	0	0	39.2989	0	0	28.1551	33.7024	0	0	0	0	0	0.71555	-2.0323	0.61412	0.98499	FALSE	1.16847	0.733817	0.69635	0.82832	0.99903	FALSE	1.21006	0	2.7143	0.48876	0.99144	FALSE
novel_circ_0000573	10	76533512	76536365	+	2853	259	ENSMUSG00000033105;	exon:76533513-76533651,exon:76536244-76536365	CON_3,HFD_2,HSD_3	2,2,3	29,24,52	Lss	Squalene cyclase, C-terminal||Terpene synthase, conserved site||Squalene cyclase||-||Squalene cyclase, N-terminal||Terpenoid cyclases/protein prenyltransferase alpha-alpha toroid	0	0	2	0	2	0	0	0	3	0	0	38.1221	0	33.7024	0	0	0	59.6101	1.03942	0.683342	0.59559	0.87147	0.9996	FALSE	0.634361	0.705644	-0.15352	0.96785	0.99903	FALSE	0.652478	1.1044	-0.75086	0.84079	0.99761	FALSE
novel_circ_0000572	10	76511019	76512568	+	1549	353	ENSMUSG00000001150;	exon:76511020-76511223,exon:76512418-76512568	CON_1,CON_2,CON_3,HFD_1,HFD_3,HSD_1,HSD_2,HSD_3	7,6,2,11,2,7,9,6	8,21,2,14,6,0,21,14	Mcm3ap	SAC3/GANP/THP3||Proteasome component (PCI) domain||Germinal-centre associated nuclear protein, CID domain||RNA-binding domain superfamily||Germinal-centre associated nuclear protein, nucleoporin homology domain||-||MCM3AP, RNA recognition motif||Germinal-centre associated nuclear protein, MCM3AP domain	7	6	2	11	0	2	7	9	6	137.546	101.642	38.1221	154.853	0	37.8774	130.57	129.923	119.22	6.83347	5.03413	0.445	0.60426	0.98499	FALSE	3.63555	5.17379	-0.47524	0.68401	0.98087	FALSE	3.77998	7.29078	-0.91058	0.36948	0.99144	FALSE
novel_circ_0000571	10	76502651	76508427	+	5776	153	ENSMUSG00000001150;	exon:76502652-76502805	CON_3	2	15	Mcm3ap	SAC3/GANP/THP3||Proteasome component (PCI) domain||Germinal-centre associated nuclear protein, CID domain||RNA-binding domain superfamily||Germinal-centre associated nuclear protein, nucleoporin homology domain||-||MCM3AP, RNA recognition motif||Germinal-centre associated nuclear protein, MCM3AP domain	0	0	2	0	0	0	0	0	0	0	0	38.1221	0	0	0	0	0	0	0	0.683342	-1.9743	0.6247	0.98499	FALSE	0	0.705644	-2.0441	0.61248	0.98087	FALSE	0	0	NA	NA	NA	NA
novel_circ_0000577	10	7669552	7676362	+	6810	199	ENSMUSG00000040034;	exon:7669553-7669630,exon:7676240-7676362	CON_1,HFD_3	2,5	6,7	Nup43	WD40-repeat-containing domain superfamily||WD40 repeat, conserved site||Nucleoporin Nup43||WD40 repeat||WD40-repeat-containing domain	2	0	0	0	0	5	0	0	0	39.2989	0	0	0	0	94.6934	0	0	0	0	0.71555	-2.0323	0.61412	0.98499	FALSE	1.74487	0.733817	1.2523	0.70109	0.98087	FALSE	1.78318	0	3.2598	0.40976	0.99144	FALSE
novel_circ_0000576	10	7669552	7675157	+	5605	77	ENSMUSG00000040034;	exon:7669553-7669630	HSD_3	2	20	Nup43	WD40-repeat-containing domain superfamily||WD40 repeat, conserved site||Nucleoporin Nup43||WD40 repeat||WD40-repeat-containing domain	0	0	0	0	0	0	0	0	2	0	0	0	0	0	0	0	0	39.7401	0.692946	0	1.8892	0.63904	0.98499	FALSE	0	0	NA	NA	NA	NA	0	0.736264	-2.0487	0.61104	0.99144	FALSE
novel_circ_0000464	10	62284278	62286652	-	2374	119	ENSMUSG00000037012;	exon:62284279-62284398	CON_1,CON_3,HFD_3,HSD_1	5,2,2,5	45,42,62,34	Hk1	Hexokinase, C-terminal||-||Hexokinase, binding site||Hexokinase||Hexokinase, N-terminal	5	0	2	0	0	2	5	0	0	98.2473	0	38.1221	0	0	37.8774	93.2644	0	0	1.68173	2.47222	-0.56165	0.79718	0.9996	FALSE	0.697949	2.54019	-1.9024	0.46532	0.98087	FALSE	0.713271	1.82024	-1.3707	0.67442	0.99144	FALSE
novel_circ_0014228	7	18899557	18903939	-	4382	394	ENSMUSG00000074358;	exon:18899558-18899713,exon:18903470-18903552,exon:18903782-18903939	CON_3,HFD_1,HFD_2,HSD_3	4,9,2,6	17,16,29,24	Ccdc61	-	0	0	4	9	2	0	0	0	6	0	0	76.2442	126.698	33.7024	0	0	0	119.22	2.07884	1.36668	0.60085	0.87549	0.9996	FALSE	3.03785	1.41129	1.1295	0.58557	0.98087	FALSE	3.1616	2.20879	0.53542	0.84948	0.99761	FALSE
novel_circ_0014229	7	18942215	18950619	+	8404	309	ENSMUSG00000030411;	exon:18942216-18942359,exon:18950453-18950619	CON_2,HFD_2,HSD_1,HSD_2	3,4,5,7	6,4,2,4	Nova2	K Homology domain||K Homology domain, type 1||RNA-binding protein Nova-2||K Homology domain, type 1 superfamily	0	3	0	0	4	0	5	7	0	0	50.8208	0	0	67.4047	0	93.2644	101.051	0	3.54856	0.923183	1.9136	0.35618	0.98499	FALSE	1.26872	0.949895	0.39916	0.9055	0.99903	FALSE	1.30496	3.79086	-1.5473	0.53675	0.99144	FALSE
novel_circ_0008779	2	13216769	13241795	-	25026	366	ENSMUSG00000026727;	exon:13216770-13216884,exon:13217189-13217271,exon:13224305-13224425,exon:13241745-13241795	CON_1,CON_2,CON_3,HFD_1,HFD_2,HFD_3,HSD_1,HSD_2,HSD_3	9,16,11,19,16,8,14,12,14	88,115,140,135,166,129,86,198,152	Rsu1	-||Leucine-rich repeat, typical subtype||Leucine-rich repeat domain superfamily||Leucine-rich repeat	9	16	11	19	16	8	14	12	14	176.845	271.044	209.672	267.474	269.619	151.509	261.14	173.23	278.181	12.7597	11.902	0.08495	0.88068	0.9996	FALSE	12.9407	12.2493	0.083368	0.88205	0.99903	FALSE	13.3699	13.6287	-0.0070077	0.98983	0.99761	FALSE
novel_circ_0008778	2	13216769	13224425	-	7656	434	ENSMUSG00000026727;	exon:13216770-13216884,exon:13217189-13217271,exon:13219009-13219127,exon:13224305-13224425	CON_1,CON_2,CON_3,HFD_1,HFD_2,HFD_3,HSD_1,HSD_3	6,9,4,20,9,3,5,13	81,130,142,139,181,124,83,145	Rsu1	-||Leucine-rich repeat, typical subtype||Leucine-rich repeat domain superfamily||Leucine-rich repeat	6	9	4	20	9	3	5	0	13	117.897	152.462	76.2442	281.551	151.661	56.816	93.2644	0	258.311	6.18588	6.28288	-0.041119	0.97434	0.9996	FALSE	9.24263	6.46243	0.53303	0.48733	0.98087	FALSE	9.58189	6.60595	0.55591	0.69269	0.99319	FALSE
novel_circ_0014222	7	17044376	17044967	-	591	302	ENSMUSG00000004328;	exon:17044377-17044567,exon:17044855-17044967	CON_2,HFD_1,HFD_2,HFD_3,HSD_1,HSD_2,HSD_3	3,4,4,2,4,3,14	60,42,46,12,28,98,62	Hif3a	Hypoxia-inducible factor, alpha subunit||PAS domain||Helix-loop-helix DNA-binding domain superfamily||PAS fold-3||PAS domain superfamily||Myc-type, basic helix-loop-helix (bHLH) domain||PAS fold	0	3	0	4	4	2	4	3	14	0	50.8208	0	56.3103	67.4047	37.8774	74.6116	43.3075	278.181	6.99608	0.923183	2.8468	0.049159	0.98499	TRUE	3.03489	0.949895	1.6394	0.41547	0.98087	FALSE	3.13339	7.45459	-1.2252	0.22347	0.99144	FALSE
novel_circ_0014223	7	17048613	17052006	-	3393	196	ENSMUSG00000004328;	exon:17051133-17051245,exon:17051922-17052006	HFD_2	3	72	Hif3a	Hypoxia-inducible factor, alpha subunit||PAS domain||Helix-loop-helix DNA-binding domain superfamily||PAS fold-3||PAS domain superfamily||Myc-type, basic helix-loop-helix (bHLH) domain||PAS fold	0	0	0	0	3	0	0	0	0	0	0	0	0	50.5536	0	0	0	0	0	0	NA	NA	NA	NA	0.951542	0	2.3196	0.5613	0.98087	FALSE	0.978717	0	2.4003	0.54776	0.99144	FALSE
novel_circ_0008777	2	13216769	13219127	-	2358	314	ENSMUSG00000026727;	exon:13216770-13216884,exon:13217189-13217271,exon:13219009-13219127	CON_1,CON_3,HFD_2,HFD_3,HSD_2,HSD_3	4,3,2,2,7,3	8.61222e+16	Rsu1	-||Leucine-rich repeat, typical subtype||Leucine-rich repeat domain superfamily||Leucine-rich repeat	4	0	3	0	2	2	0	7	3	78.5978	0	57.1832	0	33.7024	37.8774	0	101.051	59.6101	2.90625	2.45611	0.27159	0.87234	0.9996	FALSE	1.33231	2.5261	-0.93734	0.65215	0.98087	FALSE	1.36575	3.07502	-1.2107	0.52547	0.99144	FALSE
novel_circ_0001999	12	107989464	107989827	-	363	362	ENSMUSG00000048251;	exon:107989465-107989827	CON_1,CON_3	3,6	2,2	Bcl11b	Zinc finger C2H2-type||Zinc finger C2H2 superfamily	3	0	6	0	0	0	0	0	0	58.9484	0	114.366	0	0	0	0	0	0	0	3.12335	-4.1669	0.14262	0.98499	FALSE	0	3.21766	-4.2337	0.1308	0.98087	FALSE	0	0	NA	NA	NA	NA
novel_circ_0008771	2	131287473	131293524	+	6051	248	ENSMUSG00000037514;	exon:131287474-131287597,exon:131293399-131293524	HFD_3	2	28	Pank2	Type II pantothenate kinase||-	0	0	0	0	0	2	0	0	0	0	0	0	0	0	37.8774	0	0	0	0	0	NA	NA	NA	NA	0.697949	0	1.854	0.64509	0.98087	FALSE	0.713271	0	1.9267	0.63226	0.99144	FALSE
novel_circ_0008770	2	131287473	131288685	+	1212	226	ENSMUSG00000037514;	exon:131287474-131287597,exon:131288582-131288685	HFD_1	3	15	Pank2	Type II pantothenate kinase||-	0	0	0	3	0	0	0	0	0	0	0	0	42.2327	0	0	0	0	0	0	0	NA	NA	NA	NA	0.801163	0	2.0951	0.6011	0.98087	FALSE	0.836375	0	2.1951	0.58373	0.99144	FALSE
novel_circ_0008773	2	131511983	131520268	+	8285	173	ENSMUSG00000027333;	exon:131520095-131520268	CON_1,CON_2,HFD_1,HSD_3	5,2,2,2	45,93,95,98	Smox	-||Amine oxidase||FAD/NAD(P)-binding domain superfamily	5	2	0	2	0	0	0	0	2	98.2473	33.8805	0	28.1551	0	0	0	0	39.7401	0.692946	2.40433	-1.8262	0.49282	0.98499	FALSE	0.534108	2.46781	-2.1478	0.43111	0.98087	FALSE	0.557583	0.736264	-0.35722	0.92833	0.99761	FALSE
novel_circ_0008083	1	5133083	5143851	+	10768	226	ENSMUSG00000033793;	exon:5135812-5135937,exon:5143750-5143851	CON_1,HFD_1	2,3	72124	Atp6v1h	Armadillo-type fold||Armadillo-like helical||ATPase, V1 complex, subunit H||ATPase, V1 complex, subunit H, C-terminal||ATPase, V1 complex, subunit H, C-terminal domain superfamily	2	0	0	3	0	0	0	0	0	39.2989	0	0	42.2327	0	0	0	0	0	0	0.71555	-2.0323	0.61412	0.98499	FALSE	0.801163	0.733817	0.16328	0.9649	0.99903	FALSE	0.836375	0	2.1951	0.58373	0.99144	FALSE
novel_circ_0008081	1	5117389	5150061	+	32672	503	ENSMUSG00000033793;	exon:5117390-5117487,exon:5124277-5124469,exon:5143750-5143851,exon:5149948-5150061	CON_1,CON_2,CON_3,HFD_1,HFD_2,HFD_3,HSD_1,HSD_2,HSD_3	4,23,34,14,16,2,19,24,25	51,86,85,76,65,58,68,60,60	Atp6v1h	Armadillo-type fold||Armadillo-like helical||ATPase, V1 complex, subunit H||ATPase, V1 complex, subunit H, C-terminal||ATPase, V1 complex, subunit H, C-terminal domain superfamily	4	23	34	14	16	2	19	24	25	78.5978	389.626	648.076	197.086	269.619	37.8774	354.405	346.46	496.751	21.453	20.1257	0.087951	0.9058	0.9996	FALSE	9.5116	20.7461	-1.1198	0.27244	0.98087	FALSE	9.83618	22.8766	-1.1959	0.031772	0.99144	TRUE
novel_circ_0008080	1	5117389	5143851	+	26462	515	ENSMUSG00000033793;	exon:5117390-5117487,exon:5124277-5124469,exon:5135812-5135937,exon:5143750-5143851	CON_1,CON_2,CON_3,HFD_1,HFD_2,HSD_1,HSD_2,HSD_3	2,7,2,3,7,7,4,13	69,113,120,124,85,93,90,110	Atp6v1h	Armadillo-type fold||Armadillo-like helical||ATPase, V1 complex, subunit H||ATPase, V1 complex, subunit H, C-terminal||ATPase, V1 complex, subunit H, C-terminal domain superfamily	2	7	2	3	7	0	7	4	13	39.2989	118.582	38.1221	42.2327	117.958	0	130.57	57.7434	258.311	7.92533	3.55299	1.1224	0.23616	0.98499	FALSE	3.02143	3.65588	-0.2784	0.83729	0.99903	FALSE	3.12005	8.46012	-1.4143	0.16246	0.99144	FALSE
novel_circ_0011085	4	143162055	143194734	-	32679	465	ENSMUSG00000057637;	exon:143162056-143162182,exon:143170036-143170188,exon:143180877-143180991,exon:143194661-143194734	CON_1,CON_2,CON_3,HFD_1,HFD_2,HSD_1,HSD_2	6,4,6,3,5,5,4	15,50,18,19,34,22,18	Prdm2	SET domain||Zinc finger C2H2-type||Predicted retinoblastoma binding protein (RIZ)||Zinc finger C2H2 superfamily	6	4	6	3	5	0	5	4	0	117.897	67.761	114.366	42.2327	84.2559	0	93.2644	57.7434	0	2.74849	5.42759	-0.967	0.40626	0.98499	FALSE	2.38707	5.58491	-1.2055	0.30327	0.98087	FALSE	2.46757	2.94631	-0.25107	0.87975	0.99761	FALSE
novel_circ_0011084	4	143162055	143180991	-	18936	495	ENSMUSG00000057637;	exon:143162056-143162182,exon:143170036-143170188,exon:143179288-143179391,exon:143180877-143180991	CON_1,CON_3,HFD_1,HFD_2,HFD_3,HSD_2,HSD_3	3,4,3,6,14,5,7	22,20,34,43,34,30,27	Prdm2	SET domain||Zinc finger C2H2-type||Predicted retinoblastoma binding protein (RIZ)||Zinc finger C2H2 superfamily	3	0	4	3	6	14	0	5	7	58.9484	0	76.2442	42.2327	101.107	265.141	0	72.1792	139.09	3.75876	2.44001	0.63526	0.68282	0.98499	FALSE	7.58989	2.51201	1.6021	0.14472	0.98087	FALSE	7.78671	3.98451	0.94922	0.34956	0.99144	FALSE
novel_circ_0008085	1	5135811	5150061	+	14250	339	ENSMUSG00000033793;	exon:5135812-5135937,exon:5143750-5143851,exon:5149948-5150061	HSD_3	2	131	Atp6v1h	Armadillo-type fold||Armadillo-like helical||ATPase, V1 complex, subunit H||ATPase, V1 complex, subunit H, C-terminal||ATPase, V1 complex, subunit H, C-terminal domain superfamily	0	0	0	0	0	0	0	0	2	0	0	0	0	0	0	0	0	39.7401	0.692946	0	1.8892	0.63904	0.98499	FALSE	0	0	NA	NA	NA	NA	0	0.736264	-2.0487	0.61104	0.99144	FALSE
novel_circ_0008084	1	5133083	5150061	+	16978	392	ENSMUSG00000033793;	exon:5133084-5133262,exon:5143750-5143851,exon:5149948-5150061	CON_3,HFD_2,HSD_3	2,2,5	116,77,107	Atp6v1h	Armadillo-type fold||Armadillo-like helical||ATPase, V1 complex, subunit H||ATPase, V1 complex, subunit H, C-terminal||ATPase, V1 complex, subunit H, C-terminal domain superfamily	0	0	2	0	2	0	0	0	5	0	0	38.1221	0	33.7024	0	0	0	99.3502	1.73237	0.683342	1.3365	0.68493	0.98499	FALSE	0.634361	0.705644	-0.15352	0.96785	0.99903	FALSE	0.652478	1.84066	-1.4914	0.65019	0.99144	FALSE
novel_circ_0011089	4	143179287	143194734	-	15447	290	ENSMUSG00000057637;	exon:143179288-143179391,exon:143180877-143180991,exon:143194661-143194734	CON_2,HFD_1,HFD_2,HFD_3,HSD_1,HSD_2	6,3,5,3,5,6	25,34,40,30,16,29	Prdm2	SET domain||Zinc finger C2H2-type||Predicted retinoblastoma binding protein (RIZ)||Zinc finger C2H2 superfamily	0	6	0	3	5	3	5	6	0	0	101.642	0	42.2327	84.2559	56.816	93.2644	86.6151	0	3.28187	1.84637	0.8207	0.75182	0.9963	FALSE	3.43399	1.89979	0.82092	0.62147	0.98087	FALSE	3.53748	3.50934	-0.006403	0.99603	0.99766	FALSE
novel_circ_0005041	16	33030774	33040892	-	10118	370	ENSMUSG00000035578;	exon:33030775-33030936,exon:33035541-33035622,exon:33040764-33040892	HFD_1	2	2	Iqcg	IQ motif, EF-hand binding site	0	0	0	2	0	0	0	0	0	0	0	0	28.1551	0	0	0	0	0	0	0	NA	NA	NA	NA	0.534108	0	1.5189	0.70802	0.98087	FALSE	0.557583	0	1.6184	0.68858	0.99144	FALSE
novel_circ_0012688	5	73032757	73035153	-	2396	305	ENSMUSG00000070733;	exon:73032758-73032856,exon:73034946-73035153	HFD_2,HSD_1	3,5	16,11	Fryl	Cell morphogenesis central region||Cell morphogenesis protein N-terminal||Protein furry/Tao3/Mor2||Cell morphogenesis protein C-terminal||Armadillo-type fold	0	0	0	0	3	0	5	0	0	0	0	0	0	50.5536	0	93.2644	0	0	1.68173	0	3.1802	0.42154	0.98499	FALSE	0.951542	0	2.3196	0.5613	0.98087	FALSE	0.978717	1.82024	-0.88949	0.77354	0.99761	FALSE
novel_circ_0012689	5	73032757	73041593	-	8836	345	ENSMUSG00000070733;	exon:73032758-73032856,exon:73041346-73041593	HFD_1	3	7	Fryl	Cell morphogenesis central region||Cell morphogenesis protein N-terminal||Protein furry/Tao3/Mor2||Cell morphogenesis protein C-terminal||Armadillo-type fold	0	0	0	3	0	0	0	0	0	0	0	0	42.2327	0	0	0	0	0	0	0	NA	NA	NA	NA	0.801163	0	2.0951	0.6011	0.98087	FALSE	0.836375	0	2.1951	0.58373	0.99144	FALSE
novel_circ_0012682	5	72779420	72789244	-	9824	232	ENSMUSG00000029217;	exon:72779421-72779486,exon:72782003-72782170	CON_2,HFD_1,HSD_3	7,3,3	20,13,18	Tec	-||Pleckstrin homology domain||Tyrosine-protein kinase Tec, SH3 domain||PH-like domain superfamily||Protein kinase-like domain superfamily||SH2 domain||Protein kinase, ATP binding site||Protein kinase domain||SH3 domain||Tyrosine-protein kinase, active site||SH3-like domain superfamily||Serine-threonine/tyrosine-protein kinase, catalytic domain||Zinc finger, Btk motif||SH2 domain superfamily||Cyt…	0	7	0	3	0	0	0	0	3	0	118.582	0	42.2327	0	0	0	0	59.6101	1.03942	2.15409	-1.0682	0.78152	0.99898	FALSE	0.801163	2.21642	-1.4524	0.7076	0.98087	FALSE	0.836375	1.1044	-0.36565	0.91934	0.99761	FALSE
novel_circ_0012683	5	72782002	72789244	-	7242	525	ENSMUSG00000029217;	exon:72782003-72782175,exon:72783718-72783758,exon:72785917-72786045,exon:72786738-72786819,exon:72789140-72789244	CON_1,CON_2,CON_3,HFD_1,HFD_2,HFD_3,HSD_1,HSD_2,HSD_3	10,7,26,13,22,12,20,17,21	21,22,17,24,10,24,14,30,23	Tec	-||Pleckstrin homology domain||Tyrosine-protein kinase Tec, SH3 domain||PH-like domain superfamily||Protein kinase-like domain superfamily||SH2 domain||Protein kinase, ATP binding site||Protein kinase domain||SH3 domain||Tyrosine-protein kinase, active site||SH3-like domain superfamily||Serine-threonine/tyrosine-protein kinase, catalytic domain||Zinc finger, Btk motif||SH2 domain superfamily||Cyt…	10	7	26	13	22	12	20	17	21	196.495	118.582	495.587	183.008	370.726	227.264	373.058	245.409	417.271	18.5366	14.6153	0.34177	0.53475	0.98499	FALSE	14.6374	15.0589	-0.038719	0.94707	0.99903	FALSE	15.0812	19.7975	-0.38715	0.43279	0.99144	FALSE
novel_circ_0012681	5	72550291	72556345	-	6054	130	ENSMUSG00000072889;	exon:72550292-72550422	HSD_2	2	10	Nfxl1	Zinc finger, PHD-type, conserved site||Transcription factor NFX1 family||Zinc finger, RING/FYVE/PHD-type||Zinc finger, RING-type||-||Zinc finger, NF-X1-type	0	0	0	0	0	0	0	2	0	0	0	0	0	0	0	0	28.8717	0	0.53338	0	1.5621	0.70028	0.98499	FALSE	0	0	NA	NA	NA	NA	0	0.563036	-1.7139	0.67182	0.99144	FALSE
novel_circ_0012686	5	72941291	72948726	+	7435	312	ENSMUSG00000036087;	exon:72941292-72941440,exon:72948562-72948726	CON_2,HFD_1,HSD_2	5,2,2	45,34,35	Slain2	SLAIN motif-containing protein	0	5	0	2	0	0	0	2	0	0	84.7013	0	28.1551	0	0	0	28.8717	0	0.53338	1.53864	-1.4956	0.6673	0.98499	FALSE	0.534108	1.58316	-1.539	0.65393	0.98087	FALSE	0.557583	0.563036	-0.022898	0.99545	0.99761	FALSE
novel_circ_0012687	5	73027315	73041593	-	14278	247	ENSMUSG00000070733;	exon:73041346-73041593	CON_2,HFD_1,HFD_3,HSD_3	2,6,2,5	11,8,8,10	Fryl	Cell morphogenesis central region||Cell morphogenesis protein N-terminal||Protein furry/Tao3/Mor2||Cell morphogenesis protein C-terminal||Armadillo-type fold	0	2	0	6	0	2	0	0	5	0	33.8805	0	84.4654	0	37.8774	0	0	99.3502	1.73237	0.615455	1.4602	0.66135	0.98499	FALSE	2.30027	0.633264	1.8366	0.50456	0.98087	FALSE	2.38602	1.84066	0.40604	0.85069	0.99761	FALSE
novel_circ_0012684	5	72785916	72789244	-	3328	313	ENSMUSG00000029217;	exon:72785917-72786045,exon:72786738-72786819,exon:72789140-72789244	CON_2,CON_3,HSD_1	2,3,2	37,33,28	Tec	-||Pleckstrin homology domain||Tyrosine-protein kinase Tec, SH3 domain||PH-like domain superfamily||Protein kinase-like domain superfamily||SH2 domain||Protein kinase, ATP binding site||Protein kinase domain||SH3 domain||Tyrosine-protein kinase, active site||SH3-like domain superfamily||Serine-threonine/tyrosine-protein kinase, catalytic domain||Zinc finger, Btk motif||SH2 domain superfamily||Cyt…	0	2	3	0	0	0	2	0	0	0	33.8805	57.1832	0	0	0	37.3058	0	0	0.672692	1.64047	-1.308	0.66612	0.98499	FALSE	0	1.69173	-3.3114	0.35423	0.98087	FALSE	0	0.728095	-2.0346	0.6136	0.99144	FALSE
novel_circ_0012685	5	72823455	72825130	-	1675	271	ENSMUSG00000029217;	exon:72823456-72823641,exon:72825044-72825130	CON_2,CON_3,HFD_1,HFD_2,HFD_3,HSD_2,HSD_3	6,2,2,4,5,3,2	14,15,18,18,26,22,14	Tec	-||Pleckstrin homology domain||Tyrosine-protein kinase Tec, SH3 domain||PH-like domain superfamily||Protein kinase-like domain superfamily||SH2 domain||Protein kinase, ATP binding site||Protein kinase domain||SH3 domain||Tyrosine-protein kinase, active site||SH3-like domain superfamily||Serine-threonine/tyrosine-protein kinase, catalytic domain||Zinc finger, Btk motif||SH2 domain superfamily||Cyt…	0	6	2	2	4	5	0	3	2	0	101.642	38.1221	28.1551	67.4047	94.6934	0	43.3075	39.7401	1.49302	2.52971	-0.75979	0.70639	0.98723	FALSE	3.5477	2.60544	0.41172	0.77048	0.99773	FALSE	3.64572	1.58082	1.173	0.45571	0.99144	FALSE
novel_circ_0010428	3	85601859	85619013	+	17154	113	ENSMUSG00000028085;	exon:85601860-85601973	HFD_2,HSD_2	2,2	16,18	Gatb	Aspartyl/glutamyl-tRNA(Asn/Gln) amidotransferase, C-terminal, domain 2||Glutamine synthetase/guanido kinase, catalytic domain||Aspartyl/glutamyl-tRNA amidotransferase subunit B-like||Aspartyl/glutamyl-tRNA(Asn/Gln) amidotransferase, B subunit||Aspartyl/Glutamyl-tRNA(Gln) amidotransferase, subunit B/E, catalytic||Aspartyl/glutamyl-tRNA(Asn/Gln) amidotransferase, subunit B /E||Aspartyl/glutamyl-tRN…	0	0	0	0	2	0	0	2	0	0	0	0	0	33.7024	0	0	28.8717	0	0.53338	0	1.5621	0.70028	0.98499	FALSE	0.634361	0	1.7334	0.66753	0.98087	FALSE	0.652478	0.563036	0.17285	0.9655	0.99761	FALSE
novel_circ_0010429	3	85720415	85730885	-	10470	86	ENSMUSG00000051000;	exon:85720416-85720502	HFD_1,HSD_1,HSD_2,HSD_3	2,2,3,2	9,11,17,12	Fam160a1	-||Retinoic acid induced 16-like protein	0	0	0	2	0	0	2	3	2	0	0	0	28.1551	0	0	37.3058	43.3075	39.7401	2.16571	0	3.5509	0.24274	0.98499	FALSE	0.534108	0	1.5189	0.70802	0.98087	FALSE	0.557583	2.30891	-1.9926	0.43446	0.99144	FALSE
novel_circ_0010939	4	132363730	132368055	-	4325	269	ENSMUSG00000066043;	exon:132363731-132363792,exon:132365575-132365630,exon:132367902-132368055	CON_1,CON_2,CON_3,HFD_1,HFD_2,HFD_3,HSD_1,HSD_2,HSD_3	17,5,3,16,4,13,3,13,7	12,25,15,20,22,13,7,31,19	Phactr4	RPEL repeat||Phosphatase and actin regulator 4	17	5	3	16	4	13	3	13	7	334.041	84.7013	57.1832	225.241	67.4047	246.203	55.9587	187.666	139.09	6.90132	8.64582	-0.29866	0.71744	0.98984	FALSE	10.0783	8.87907	0.19652	0.79456	0.99903	FALSE	10.4019	7.3288	0.48692	0.50683	0.99144	FALSE
novel_circ_0006834	19	3614225	3615879	-	1654	184	ENSMUSG00000024913;	exon:3614226-3614410	HFD_1	3	30	Lrp5	EGF-like domain||Six-bladed beta-propeller, TolB-like||Low-density lipoprotein (LDL) receptor class A, conserved site||-||LDLR class B repeat||Low-density lipoprotein (LDL) receptor class A repeat||LDL receptor-like superfamily||Low density lipoprotein receptor-related protein 5/6	0	0	0	3	0	0	0	0	0	0	0	0	42.2327	0	0	0	0	0	0	0	NA	NA	NA	NA	0.801163	0	2.0951	0.6011	0.98087	FALSE	0.836375	0	2.1951	0.58373	0.99144	FALSE
novel_circ_0006835	19	36411955	36412236	+	281	280	ENSMUSG00000024805;	exon:36411956-36412236	CON_2,CON_3	2,2	42,32	Pcgf5	-||Zinc finger, RING-type||RAWUL domain||Zinc finger, RING/FYVE/PHD-type||Zinc finger, RING-type, conserved site	0	2	2	0	0	0	0	0	0	0	33.8805	38.1221	0	0	0	0	0	0	0	1.2988	-2.9075	0.44764	0.98499	FALSE	0	1.33891	-2.9755	0.42549	0.98087	FALSE	0	0	NA	NA	NA	NA
novel_circ_0006836	19	36411955	36440147	+	28192	262	ENSMUSG00000024805;	exon:36437155-36437210,exon:36437303-36437362,exon:36439999-36440147	CON_2,HFD_3,HSD_1	2,3,5	30,37,23	Pcgf5	-||Zinc finger, RING-type||RAWUL domain||Zinc finger, RING/FYVE/PHD-type||Zinc finger, RING-type, conserved site	0	2	0	0	0	3	5	0	0	0	33.8805	0	0	0	56.816	93.2644	0	0	1.68173	0.615455	1.421	0.67231	0.98499	FALSE	1.04692	0.633264	0.68862	0.85047	0.99903	FALSE	1.06991	1.82024	-0.7786	0.79814	0.99761	FALSE
novel_circ_0010421	3	84527685	84534695	-	7010	315	ENSMUSG00000102805;ENSMUSG00000074513;	exon:84527686-84527798,exon:84529170-84529265,exon:84534587-84534695	CON_2,CON_3,HFD_1,HFD_2,HFD_3,HSD_1,HSD_2,HSD_3	2,5,4,11,4,3,2,5	57,64,69,65,63,44,96,78	Gm37240;Arfip1	-	0	2	5	4	11	4	3	2	5	0	33.8805	95.3053	56.3103	185.363	75.7547	55.9587	28.8717	99.3502	3.27478	2.32381	0.48009	0.75231	0.9963	FALSE	5.9531	2.39737	1.3051	0.2707	0.98087	FALSE	6.13034	3.49584	0.82954	0.41738	0.99144	FALSE
novel_circ_0010422	3	84527685	84548035	-	20350	416	ENSMUSG00000074513;	exon:84527686-84527798,exon:84529170-84529265,exon:84534587-84534695,exon:84547934-84548035	CON_1,CON_2,CON_3,HFD_2,HFD_3	7,4,2,8,2	54,64,59,69,56	Arfip1	Arfaptin family||AH/BAR domain superfamily||Arfaptin-1||Arfaptin homology (AH) domain	7	4	2	0	8	2	0	0	0	137.546	67.761	38.1221	0	134.809	37.8774	0	0	0	0	4.41868	-4.6682	0.026168	0.98499	TRUE	3.23539	4.54053	-0.50016	0.69152	0.98087	FALSE	3.32318	0	4.1645	0.25564	0.99144	FALSE
novel_circ_0010931	4	132230985	132234906	-	3921	294	ENSMUSG00000028901;	exon:132230986-132231123,exon:132234749-132234906	CON_1,HFD_1,HSD_2,HSD_3	4,3,2,3	4,4,3,8	Gmeb1	SAND-like domain superfamily||SAND domain||Glucocorticoid modulatory element-binding protein 1/2	4	0	0	3	0	0	0	2	3	78.5978	0	0	42.2327	0	0	0	28.8717	59.6101	1.5728	1.4311	0.14761	0.95602	0.9996	FALSE	0.801163	1.46763	-0.83693	0.80203	0.99903	FALSE	0.836375	1.66743	-0.96262	0.74393	0.99761	FALSE
novel_circ_0010425	3	84878353	84904079	+	25726	118	ENSMUSG00000102805;ENSMUSG00000028086;	intron:84878354-84878472	HSD_1,HSD_3	2,3	6,2	Gm37240;Fbxw7	-	0	0	0	0	0	0	2	0	3	0	0	0	0	0	0	37.3058	0	59.6101	1.71211	0	3.2033	0.37682	0.98499	FALSE	0	0	NA	NA	NA	NA	0	1.83249	-3.3724	0.35325	0.99144	FALSE
novel_circ_0010934	4	132321678	132326045	-	4367	282	ENSMUSG00000028898;	exon:132321679-132321810,exon:132325208-132325260,exon:132325946-132326045	HSD_3	6	19	Trnau1ap	tRNA selenocysteine 1-associated protein 1||tRNA selenocysteine 1-associated protein 1, C-terminal||-||Nucleotide-binding alpha-beta plait domain superfamily||RNA-binding domain superfamily||SECp43, RNA recognition motif 2||RNA recognition motif domain	0	0	0	0	0	0	0	0	6	0	0	0	0	0	0	0	0	119.22	2.07884	0	3.4844	0.35778	0.98499	FALSE	0	0	NA	NA	NA	NA	0	2.20879	-3.6433	0.33361	0.99144	FALSE
novel_circ_0010427	3	84903500	84904079	+	579	578	ENSMUSG00000028086;	exon:84903501-84904079	CON_1,CON_2,CON_3,HFD_1,HFD_2,HFD_3,HSD_1,HSD_2,HSD_3	73,49,68,87,56,75,61,68,43	12,23,21,36,15,19,21,19,12	Fbxw7	WD40 repeat||WD40-repeat-containing domain||WD40/YVTN repeat-like-containing domain superfamily||G-protein beta WD-40 repeat||WD40 repeat, conserved site||WD40-repeat-containing domain superfamily||F-box domain||F-box-like domain superfamily	73	49	68	87	56	75	61	68	43	1434.41	830.072	1296.15	1224.75	943.666	1420.4	1137.83	981.638	854.412	53.5504	64.4298	-0.2607	0.37747	0.98499	FALSE	67.1689	66.2912	0.022983	0.93486	0.99903	FALSE	69.2719	57.1798	0.27545	0.31914	0.99144	FALSE
novel_circ_0000168	10	127646890	127648189	+	1299	357	ENSMUSG00000002147;	exon:127646891-127647027,exon:127647685-127647823,exon:127648106-127648189	CON_1,CON_2,CON_3,HFD_1,HFD_2,HFD_3,HSD_1,HSD_2,HSD_3	16,12,6,33,9,15,18,18,18	65,95,69,78,117,100,73,138,114	Stat6	SH2 domain||STAT6, SH2 domain||STAT transcription factor, protein interaction||STAT6, C-terminal||STAT transcription factor, coiled coil||STAT transcription factor, DNA-binding, N-terminal||p53-like transcription factor, DNA-binding||SH2 domain superfamily||STAT transcription factor, DNA-binding||STAT transcription factor, all-alpha domain||STAT transcription factor, N-terminal domain superfamily…	16	12	6	33	9	15	18	18	18	314.391	203.283	114.366	464.56	151.661	284.08	335.752	259.845	357.661	17.0912	11.4672	0.57544	0.29229	0.98499	FALSE	16.902	11.7871	0.53543	0.35646	0.98087	FALSE	17.4858	18.2465	-0.041558	0.93445	0.99761	FALSE
novel_circ_0000169	10	127688232	127693598	+	5366	114	ENSMUSG00000040195;	exon:127693484-127693598	HFD_2	2	11	Nemp1	NEMP family	0	0	0	0	2	0	0	0	0	0	0	0	0	33.7024	0	0	0	0	0	0	NA	NA	NA	NA	0.634361	0	1.7334	0.66753	0.98087	FALSE	0.652478	0	1.8143	0.65303	0.99144	FALSE
novel_circ_0000160	10	12720017	12728818	-	8801	194	ENSMUSG00000019820;	exon:12720018-12720105,exon:12728711-12728818	HFD_3,HSD_3	3,3	72,86	Utrn	Actinin-type actin-binding domain, conserved site||Spectrin repeat||-||CH domain superfamily||EF-hand domain pair||EF-hand domain, type 1||WW domain superfamily||Spectrin/alpha-actinin||Zinc finger, ZZ-type||Calponin homology domain||WW domain||Dystrophin/utrophin||EF-hand domain, type 2	0	0	0	0	0	3	0	0	3	0	0	0	0	0	56.816	0	0	59.6101	1.03942	0	2.4794	0.53409	0.98499	FALSE	1.04692	0	2.4455	0.53951	0.98087	FALSE	1.06991	1.1044	-0.04893	0.98875	0.99761	FALSE
novel_circ_0000161	10	127274713	127278408	+	3695	346	ENSMUSG00000025410;	exon:127274714-127274810,exon:127274994-127275055,exon:127275824-127275922,exon:127278317-127278408	CON_1,HFD_1,HFD_2,HFD_3	3,6,4,4	213310336294	Dctn2	Dynamitin	3	0	0	6	4	4	0	0	0	58.9484	0	0	84.4654	67.4047	75.7547	0	0	0	0	1.07332	-2.6209	0.51123	0.98499	FALSE	4.26695	1.10073	1.9931	0.23171	0.98087	FALSE	4.40425	0	4.5738	0.026887	0.99144	TRUE
novel_circ_0000164	10	127310003	127310534	-	531	224	ENSMUSG00000040354;	exon:127310004-127310138,exon:127310444-127310534	HSD_1,HSD_3	4,2	36,72	Mars	Methionyl-tRNA synthetase, anticodon-binding domain||Glutathione S-transferase, C-terminal-like||WHEP-TRS domain||Methioninyl-tRNA synthetase core domain||Glutathione S-transferase, C-terminal domain superfamily||Aminoacyl-tRNA synthetase, class Ia, anticodon-binding||Methionyl-tRNA synthetase, Zn-domain||Methionyl/Leucyl tRNA synthetase||Aminoacyl-tRNA synthetase, class I, conserved site||Methio…	0	0	0	0	0	0	4	0	2	0	0	0	0	0	0	74.6116	0	39.7401	2.03833	0	3.4561	0.31479	0.98499	FALSE	0	0	NA	NA	NA	NA	0	2.19245	-3.6317	0.28665	0.99144	FALSE
novel_circ_0000167	10	127444275	127454756	+	10481	325	ENSMUSG00000025404;	exon:127444276-127444475,exon:127454630-127454756	CON_3,HSD_3	2,3	10,18	R3hdm2	R3H domain superfamily||R3H domain||SUZ domain||-	0	0	2	0	0	0	0	0	3	0	0	38.1221	0	0	0	0	0	59.6101	1.03942	0.683342	0.59559	0.87147	0.9996	FALSE	0	0.705644	-2.0441	0.61248	0.98087	FALSE	0	1.1044	-2.6386	0.50819	0.99144	FALSE
mmu_circ_0001324	5	21670488	21683465	-	12977	1072	ENSMUSG00000044968;	exon:21670489-21670603	HSD_1,HSD_3	3,2	10,6	Napepld	Ribonuclease Z/Hydroxyacylglutathione hydrolase-like||N-acyl-phosphatidylethanolamine-hydrolysing phospholipase D||Metallo-beta-lactamase	0	0	0	0	0	0	3	0	2	0	0	0	0	0	0	55.9587	0	39.7401	1.70198	0	3.1954	0.37869	0.98499	FALSE	0	0	NA	NA	NA	NA	0	1.82841	-3.3694	0.35397	0.99144	FALSE
mmu_circ_0001325	5	23540374	23565265	-	24891	544	ENSMUSG00000062604;	exon:23540375-23540481,exon:23545523-23545610,exon:23548455-23548563,exon:23565114-23565265	CON_1,CON_2,CON_3,HFD_1,HFD_2,HFD_3,HSD_1,HSD_2,HSD_3	3,3,7,6,9,5,5,13,6	8,12,7,10,11,17,8,11,4	Srpk2	Protein kinase-like domain superfamily||Protein kinase domain||-||Serine/threonine-protein kinase, active site||Protein kinase, ATP binding site	3	3	7	6	9	5	5	13	6	58.9484	50.8208	133.427	84.4654	151.661	94.6934	93.2644	187.666	119.22	7.22754	4.3882	0.73709	0.4042	0.98499	FALSE	6.20182	4.52038	0.45842	0.61231	0.98087	FALSE	6.39208	7.68876	-0.28565	0.71158	0.99614	FALSE
novel_circ_0011339	4	46460089	46463929	+	3840	271	ENSMUSG00000028333;	exon:46460090-46460239,exon:46463807-46463929	CON_2	4	4	Anp32b	Leucine-rich repeat domain superfamily||Leucine-rich repeat||U2A'/phosphoprotein 32 family A, C-terminal	0	4	0	0	0	0	0	0	0	0	67.761	0	0	0	0	0	0	0	0	1.23091	-2.8357	0.47597	0.98499	FALSE	0	1.26653	-2.901	0.46587	0.98087	FALSE	0	0	NA	NA	NA	NA
mmu_circ_0001327	5	25347360	25349940	-	2580	249	ENSMUSG00000038056;	exon:25347361-25347480,exon:25349812-25349940	CON_1,CON_2,CON_3,HFD_1,HFD_2,HFD_3,HSD_1,HSD_2,HSD_3	22,36,15,17,9,17,14,30,26	37,56,43,76,35,43,26,67,61	Kmt2c	High mobility group box domain||Histone-lysine N-methyltransferase 2C||Zinc finger, PHD-finger||Extended PHD (ePHD) domain||Zinc finger, PHD-type||Post-SET domain||Zinc finger, RING-type||FY-rich, C-terminal||HMG-I/HMG-Y, DNA-binding, conserved site||SET domain||FY-rich, N-terminal||KMT2C, ePHD2||High mobility group box domain superfamily||Zinc finger, FYVE/PHD-type||KMT2C, ePHD1||Zinc finger, RI…	22	36	15	17	9	17	14	30	26	432.288	609.849	285.916	239.319	151.661	321.958	261.14	433.075	516.621	21.7178	24.0743	-0.15188	0.73303	0.99324	FALSE	13.3271	24.7631	-0.90444	0.062433	0.98087	FALSE	13.7384	23.1136	-0.75774	0.11963	0.99144	FALSE
mmu_circ_0001323	5	21455781	21459293	+	3512	231	ENSMUSG00000047221;	exon:21459159-21459293	CON_2,HFD_2	3,5	16,9	Fam185a	Putative adhesin	0	3	0	0	5	0	0	0	0	0	50.8208	0	0	84.2559	0	0	0	0	0	0.923183	-2.4234	0.54478	0.98499	FALSE	1.5859	0.949895	0.72005	0.82227	0.99903	FALSE	1.63119	0	3.1382	0.42794	0.99144	FALSE
novel_circ_0011333	4	45987461	45992270	+	4809	253	ENSMUSG00000035517;	exon:45990050-45990230,exon:45992197-45992270	HFD_2,HFD_3	2,6	56,36	Tdrd7	TDRD7, third LOTUS domain||LOTUS-like domain||Tudor domain||SNase-like, OB-fold superfamily||OST-HTH/LOTUS domain	0	0	0	0	2	6	0	0	0	0	0	0	0	33.7024	113.632	0	0	0	0	0	NA	NA	NA	NA	2.72821	0	3.8337	0.21298	0.98087	FALSE	2.79229	0	3.9076	0.20141	0.99144	FALSE
novel_circ_0011332	4	45987461	45990230	+	2769	533	ENSMUSG00000035517;	exon:45987462-45987674,exon:45989078-45989219,exon:45990050-45990230	CON_1,CON_2,CON_3,HFD_1,HFD_2,HFD_3,HSD_1,HSD_2,HSD_3	5,10,4,5,6,7,9,10,5	42,77,37,46,53,44,41,66,70	Tdrd7	TDRD7, third LOTUS domain||LOTUS-like domain||Tudor domain||SNase-like, OB-fold superfamily||OST-HTH/LOTUS domain	5	10	4	5	6	7	9	10	5	98.2473	169.403	76.2442	70.3878	101.107	132.571	167.876	144.358	99.3502	7.42638	6.23284	0.24719	0.75278	0.9963	FALSE	5.68118	6.41215	-0.19597	0.81336	0.99903	FALSE	5.84784	7.93226	-0.45495	0.55806	0.99144	FALSE
novel_circ_0011330	4	45359760	45370508	+	10748	399	ENSMUSG00000035572;	exon:45359761-45359958,exon:45370306-45370508	CON_1	2	11	Dcaf10	WD40-repeat-containing domain superfamily||Ricin B, lectin domain||DDB1- and CUL4-associated factor 10||WD40-repeat-containing domain||WD40 repeat||WD40 repeat, conserved site||WD40/YVTN repeat-like-containing domain superfamily	2	0	0	0	0	0	0	0	0	39.2989	0	0	0	0	0	0	0	0	0	0.71555	-2.0323	0.61412	0.98499	FALSE	0	0.733817	-2.0934	0.60355	0.98087	FALSE	0	0	NA	NA	NA	NA
novel_circ_0011337	4	46025656	46026159	+	503	502	ENSMUSG00000035517;	exon:46025657-46026159	HFD_1,HFD_2,HFD_3,HSD_1,HSD_2	4,7,3,4,5	16,21,25,22,33	Tdrd7	TDRD7, third LOTUS domain||LOTUS-like domain||Tudor domain||SNase-like, OB-fold superfamily||OST-HTH/LOTUS domain	0	0	0	4	7	3	4	5	0	0	0	0	56.3103	117.958	56.816	74.6116	72.1792	0	2.67883	0	3.8608	0.20745	0.98499	FALSE	4.3354	0	4.5094	0.030211	0.98087	TRUE	4.46875	2.86378	0.62257	0.61894	0.99144	FALSE
mmu_circ_0001329	5	28358273	28368313	+	10040	557	ENSMUSG00000048271;	exon:28358274-28358482,exon:28361946-28362234,exon:28368255-28368313	CON_1,CON_2,CON_3,HFD_1,HFD_2,HFD_3,HSD_1,HSD_2,HSD_3	12,8,24,19,20,14,12,17,31	9,20,26,15,17,9,16,18,16	Rbm33	-||RNA-binding protein 33||RNA-binding domain superfamily||Nucleotide-binding alpha-beta plait domain superfamily||RNA recognition motif domain	12	8	24	19	20	14	12	17	31	235.793	135.522	457.465	267.474	337.024	265.141	223.835	245.409	615.972	19.3106	14.9552	0.36654	0.58038	0.98499	FALSE	16.3033	15.4037	0.089291	0.86662	0.99903	FALSE	16.8147	20.5665	-0.27887	0.57444	0.99144	FALSE
novel_circ_0011335	4	45989077	45992270	+	3193	394	ENSMUSG00000035517;	exon:45989078-45989219,exon:45990050-45990230,exon:45992197-45992270	CON_2,CON_3,HFD_1,HFD_2,HFD_3,HSD_1,HSD_2,HSD_3	4,12,9,12,6,5,6,8	84,54,69,62,61,50,77,56	Tdrd7	TDRD7, third LOTUS domain||LOTUS-like domain||Tudor domain||SNase-like, OB-fold superfamily||OST-HTH/LOTUS domain	0	4	12	9	12	6	5	6	8	0	67.761	228.733	126.698	202.214	113.632	93.2644	86.6151	158.96	6.05366	5.33096	0.1753	0.86114	0.9996	FALSE	8.3035	5.50039	0.59367	0.60107	0.98087	FALSE	8.56381	6.4544	0.41914	0.5735	0.99144	FALSE
novel_circ_0011334	4	45987461	45994524	+	7063	217	ENSMUSG00000035517;	exon:45994307-45994524	HSD_3	6	63	Tdrd7	TDRD7, third LOTUS domain||LOTUS-like domain||Tudor domain||SNase-like, OB-fold superfamily||OST-HTH/LOTUS domain	0	0	0	0	0	0	0	0	6	0	0	0	0	0	0	0	0	119.22	2.07884	0	3.4844	0.35778	0.98499	FALSE	0	0	NA	NA	NA	NA	0	2.20879	-3.6433	0.33361	0.99144	FALSE
novel_circ_0006254	18	36575018	36581215	+	6197	453	ENSMUSG00000024483;	exon:36575019-36575169,exon:36578618-36578774,exon:36581068-36581215	CON_1,CON_2,HFD_1,HFD_2,HFD_3,HSD_1,HSD_2,HSD_3	5,8,15,5,8,7,6,9	35,40,52,46,47,46,62,27	Ankhd1	-||K Homology domain||K Homology domain, type 1 superfamily||Ankyrin repeat||K Homology domain, type 1||Ankyrin repeat-containing domain||Ankyrin repeat-containing domain superfamily	5	8	0	15	5	8	7	6	9	98.2473	135.522	0	211.164	84.2559	151.509	130.57	86.6151	178.83	7.07282	4.2507	0.71612	0.45963	0.98499	FALSE	8.38351	4.3676	0.93603	0.30153	0.98087	FALSE	8.66615	7.55063	0.22325	0.75832	0.99761	FALSE
novel_circ_0003542	14	123169632	123190215	+	20583	367	ENSMUSG00000115016;	intron:123169633-123169765,intron:123174527-123174665,intron:123190118-123190215	CON_1,CON_2,HFD_1,HFD_2,HFD_3,HSD_2	6,2,4,5,5,15	0,5,0,4,0,1	--	-	6	2	0	4	5	5	0	15	0	117.897	33.8805	0	56.3103	84.2559	94.6934	0	216.538	0	4.00035	2.7621	0.54533	0.85558	0.9996	FALSE	4.39899	2.83471	0.64063	0.61247	0.98087	FALSE	4.52954	4.22277	0.077072	0.96757	0.99761	FALSE
novel_circ_0003541	14	123169632	123174665	+	5033	428	ENSMUSG00000115016;	exon:123169633-123169765,exon:123172042-123172200,exon:123174527-123174665	CON_1,CON_2,CON_3,HFD_1,HFD_2,HFD_3,HSD_1,HSD_2,HSD_3	8,10,7,23,16,17,10,34,20	1,8,3,4,7,3,2,9,4	--	-	8	10	7	23	16	17	10	34	20	157.196	169.403	133.427	323.784	269.619	321.958	186.529	490.819	397.401	19.3604	8.33117	1.2246	0.033796	0.98499	TRUE	17.1497	8.57134	0.99939	0.072536	0.98087	FALSE	17.6948	20.5747	-0.23011	0.6292	0.99144	FALSE
novel_circ_0003540	14	122971739	122973285	-	1546	331	ENSMUSG00000041594;	exon:122971740-122971956,exon:122973170-122973285	CON_1,CON_2,CON_3,HFD_1,HFD_2,HFD_3,HSD_1,HSD_2,HSD_3	7,7,8,4,15,6,4,14,8	13,17,29,21,41,23,15,30,15	Tmtc4	Tetratricopeptide repeat||Tetratricopeptide-like helical domain superfamily||-||Domain of unknown function DUF1736||Tetratricopeptide repeat-containing domain||Tetratricopeptide repeat 1	7	7	8	4	15	6	4	14	8	137.546	118.582	152.488	56.3103	252.768	113.632	74.6116	202.102	158.96	7.85083	7.39189	0.10322	0.88905	0.9996	FALSE	7.91977	7.60736	0.048972	0.9483	0.99903	FALSE	8.14856	8.34249	-0.057954	0.93929	0.99761	FALSE
novel_circ_0010688	4	108491347	108499398	+	8051	432	ENSMUSG00000034610;	exon:108491348-108491464,exon:108495150-108495327,exon:108496967-108497055,exon:108499347-108499398	CON_1,CON_2,CON_3,HFD_1,HFD_2,HFD_3,HSD_1,HSD_2,HSD_3	8,15,8,9,12,6,10,16,10	28,25,27,17,20,20,9,29,13	Tut4	Zinc finger, CCHC-type||Polymerase, nucleotidyl transferase domain||Zinc finger, CCHC-type superfamily||PAP/25A-associated||-||Winged helix DNA-binding domain superfamily	8	15	8	9	12	6	10	16	10	157.196	254.104	152.488	126.698	202.214	113.632	186.529	230.974	198.7	11.0952	10.2115	0.11791	0.84651	0.9996	FALSE	8.3035	10.5073	-0.34633	0.59555	0.98087	FALSE	8.56381	11.8261	-0.4705	0.45249	0.99144	FALSE
novel_circ_0010689	4	108495149	108499398	+	4249	316	ENSMUSG00000034610;	exon:108495150-108495327,exon:108496967-108497055,exon:108499347-108499398	CON_2,HSD_1,HSD_2	2,3,3	20,19,26	Tut4	Zinc finger, CCHC-type||Polymerase, nucleotidyl transferase domain||Zinc finger, CCHC-type superfamily||PAP/25A-associated||-||Winged helix DNA-binding domain superfamily	0	2	0	0	0	0	3	3	0	0	33.8805	0	0	0	0	55.9587	43.3075	0	1.80911	0.615455	1.5321	0.60596	0.98499	FALSE	0	0.633264	-1.9087	0.63725	0.98087	FALSE	0	1.9367	-3.4626	0.32979	0.99144	FALSE
novel_circ_0010685	4	108486453	108491464	+	5011	279	ENSMUSG00000034610;	exon:108486454-108486617,exon:108491348-108491464	CON_2,HFD_2,HSD_2	2,3,3	28,28,35	Tut4	Zinc finger, CCHC-type||Polymerase, nucleotidyl transferase domain||Zinc finger, CCHC-type superfamily||PAP/25A-associated||-||Winged helix DNA-binding domain superfamily	0	2	0	0	3	0	0	3	0	0	33.8805	0	0	50.5536	0	0	43.3075	0	0.800071	0.615455	0.38603	0.91983	0.9996	FALSE	0.951542	0.633264	0.5652	0.87837	0.99903	FALSE	0.978717	0.844554	0.18118	0.96071	0.99761	FALSE
novel_circ_0010686	4	108486453	108495327	+	8874	177	ENSMUSG00000034610;	exon:108495150-108495327	HFD_1	3	19	Tut4	Zinc finger, CCHC-type||Polymerase, nucleotidyl transferase domain||Zinc finger, CCHC-type superfamily||PAP/25A-associated||-||Winged helix DNA-binding domain superfamily	0	0	0	3	0	0	0	0	0	0	0	0	42.2327	0	0	0	0	0	0	0	NA	NA	NA	NA	0.801163	0	2.0951	0.6011	0.98087	FALSE	0.836375	0	2.1951	0.58373	0.99144	FALSE
novel_circ_0010687	4	108486453	108503035	+	16582	283	ENSMUSG00000034610;	exon:108486454-108486617,exon:108499347-108499398,exon:108502966-108503035	HFD_1	3	12	Tut4	Zinc finger, CCHC-type||Polymerase, nucleotidyl transferase domain||Zinc finger, CCHC-type superfamily||PAP/25A-associated||-||Winged helix DNA-binding domain superfamily	0	0	0	3	0	0	0	0	0	0	0	0	42.2327	0	0	0	0	0	0	0	NA	NA	NA	NA	0.801163	0	2.0951	0.6011	0.98087	FALSE	0.836375	0	2.1951	0.58373	0.99144	FALSE
novel_circ_0010680	4	108478872	108486617	+	7745	163	ENSMUSG00000034610;	exon:108486454-108486617	CON_1,HFD_2,HFD_3,HSD_1,HSD_3	6,7,2,4,6	17,11,21,8,9	Tut4	Zinc finger, CCHC-type||Polymerase, nucleotidyl transferase domain||Zinc finger, CCHC-type superfamily||PAP/25A-associated||-||Winged helix DNA-binding domain superfamily	6	0	0	0	7	2	4	0	6	117.897	0	0	0	117.958	37.8774	74.6116	0	119.22	3.42422	2.14665	0.67552	0.80796	0.9996	FALSE	2.91821	2.20145	0.41027	0.88459	0.99903	FALSE	2.99694	3.66498	-0.28065	0.85403	0.99761	FALSE
novel_circ_0010681	4	108478872	108491464	+	12592	116	ENSMUSG00000034610;	exon:108491348-108491464	CON_1,HFD_1,HFD_2,HFD_3,HSD_1,HSD_2	2,6,4,7,4,6	19,20,18,15,11,14	Tut4	Zinc finger, CCHC-type||Polymerase, nucleotidyl transferase domain||Zinc finger, CCHC-type superfamily||PAP/25A-associated||-||Winged helix DNA-binding domain superfamily	2	0	0	6	4	7	4	6	0	39.2989	0	0	84.4654	67.4047	132.571	74.6116	86.6151	0	2.94552	0.71555	2.0784	0.38271	0.98499	FALSE	5.31387	0.733817	2.9046	0.075742	0.98087	FALSE	5.47415	3.1453	0.76947	0.49456	0.99144	FALSE
novel_circ_0010682	4	108478872	108495327	+	16455	293	ENSMUSG00000034610;	exon:108491348-108491464,exon:108495150-108495327	CON_2,HFD_2	4,2	19,15	Tut4	Zinc finger, CCHC-type||Polymerase, nucleotidyl transferase domain||Zinc finger, CCHC-type superfamily||PAP/25A-associated||-||Winged helix DNA-binding domain superfamily	0	4	0	0	2	0	0	0	0	0	67.761	0	0	33.7024	0	0	0	0	0	1.23091	-2.8357	0.47597	0.98499	FALSE	0.634361	1.26653	-1.0137	0.77425	0.99773	FALSE	0.652478	0	1.8143	0.65303	0.99144	FALSE
novel_circ_0010683	4	108478872	108497055	+	18183	88	ENSMUSG00000034610;	exon:108496967-108497055	HFD_2	4	10	Tut4	Zinc finger, CCHC-type||Polymerase, nucleotidyl transferase domain||Zinc finger, CCHC-type superfamily||PAP/25A-associated||-||Winged helix DNA-binding domain superfamily	0	0	0	0	4	0	0	0	0	0	0	0	0	67.4047	0	0	0	0	0	0	NA	NA	NA	NA	1.26872	0	2.7352	0.49101	0.98087	FALSE	1.30496	0	2.8159	0.47832	0.99144	FALSE
novel_circ_0003545	14	123827751	123857579	+	29828	426	ENSMUSG00000032925;	exon:123843797-123843937,exon:123846439-123846579,exon:123857433-123857579	CON_2,CON_3,HFD_1,HFD_2,HFD_3,HSD_1,HSD_2	4,5,12,8,12,4,4	12,22,35,18,30,9,30	Itgbl1	EGF-like domain||EGF-like domain, extracellular||-||Integrin beta subunit||Integrin beta-like protein 1	0	4	5	12	8	12	4	4	0	0	67.761	95.3053	168.931	134.809	227.264	74.6116	57.7434	0	2.41214	2.93927	-0.28161	0.86623	0.9996	FALSE	9.92979	3.03064	1.6935	0.057321	0.98087	FALSE	10.235	2.58226	1.9622	0.032528	0.99144	TRUE
novel_circ_0006253	18	36575018	36578774	+	3756	306	ENSMUSG00000024483;	exon:36575019-36575169,exon:36578618-36578774	CON_1,CON_2,CON_3,HFD_1,HFD_2,HFD_3,HSD_1,HSD_2,HSD_3	2,3,6,4,4,2,6,5,2	32,29,26,53,49,36,43,53,31	Ankhd1	-||K Homology domain||K Homology domain, type 1 superfamily||Ankyrin repeat||K Homology domain, type 1||Ankyrin repeat-containing domain||Ankyrin repeat-containing domain superfamily	2	3	6	4	4	2	6	5	2	39.2989	50.8208	114.366	56.3103	67.4047	37.8774	111.917	72.1792	39.7401	4.04447	3.68876	0.13519	0.9054	0.9996	FALSE	3.03489	3.80065	-0.31785	0.79194	0.99903	FALSE	3.13339	4.32814	-0.46018	0.68976	0.99229	FALSE
novel_circ_0002908	13	17888506	17897102	-	8596	323	ENSMUSG00000008859;	exon:17888507-17888681,exon:17896953-17897102	CON_1,CON_3,HSD_1,HSD_3	2,6,6,3	34,27,38,59	Rala	Ras-related protein Ral||Small GTPase superfamily, Ras-type||Small GTPase||Small GTP-binding protein domain||P-loop containing nucleoside triphosphate hydrolase	2	0	6	0	0	0	6	0	3	39.2989	0	114.366	0	0	0	111.917	0	59.6101	3.05749	2.76558	0.13526	0.93448	0.9996	FALSE	0	2.85075	-4.0595	0.17743	0.98087	FALSE	0	3.28868	-4.2162	0.12978	0.99144	FALSE
novel_circ_0016549	X	105826100	105836427	-	10327	117	ENSMUSG00000031229;	exon:105836310-105836427	HFD_2,HSD_2	2,2	16,16	Atrx	-||SNF2-related, N-terminal domain||P-loop containing nucleoside triphosphate hydrolase||Helicase superfamily 1/2, ATP-binding domain||ADD domain||Zinc finger, FYVE/PHD-type||Helicase, C-terminal||SNF2-like, N-terminal domain superfamily||ATRX, ADD domain||Zinc finger, RING/FYVE/PHD-type	0	0	0	0	2	0	0	2	0	0	0	0	0	33.7024	0	0	28.8717	0	0.53338	0	1.5621	0.70028	0.98499	FALSE	0.634361	0	1.7334	0.66753	0.98087	FALSE	0.652478	0.563036	0.17285	0.9655	0.99761	FALSE
novel_circ_0003549	14	14013072	14013655	+	583	364	ENSMUSG00000021738;	exon:14013073-14013369,exon:14013587-14013655	CON_1,CON_2,CON_3,HFD_1,HFD_2,HFD_3,HSD_1,HSD_2,HSD_3	45,108,51,103,125,79,64,109,106	26,49,21,31,42,28,37,51,38	Atxn7	Ataxin-7||SCA7 domain	45	108	51	103	125	79	64	109	106	884.225	1829.55	972.114	1449.99	2106.4	1496.16	1193.78	1573.51	2106.23	87.3215	66.7597	0.38307	0.33858	0.98499	FALSE	94.7231	68.701	0.45868	0.22583	0.98087	FALSE	97.6696	93.0065	0.070635	0.7838	0.99761	FALSE
novel_circ_0002452	12	65105027	65114018	+	8991	147	ENSMUSG00000055884;	exon:65113774-65113859,exon:65113956-65114018	CON_3	2	4	Fancm	Helicase, C-terminal||Helicase/UvrB, N-terminal||RuvA domain 2-like||-||Restriction endonuclease type II-like||ERCC4 domain||P-loop containing nucleoside triphosphate hydrolase||Helicase superfamily 1/2, ATP-binding domain||Fanconi anemia group M protein, MHF binding domain	0	0	2	0	0	0	0	0	0	0	0	38.1221	0	0	0	0	0	0	0	0.683342	-1.9743	0.6247	0.98499	FALSE	0	0.705644	-2.0441	0.61248	0.98087	FALSE	0	0	NA	NA	NA	NA
novel_circ_0006259	18	36581067	36589581	+	8514	147	ENSMUSG00000024483;	exon:36581068-36581215	CON_1,CON_2,CON_3,HSD_1	8,6,9,2	31,29,42,43	Ankhd1	-||K Homology domain||K Homology domain, type 1 superfamily||Ankyrin repeat||K Homology domain, type 1||Ankyrin repeat-containing domain||Ankyrin repeat-containing domain superfamily	8	6	9	0	0	0	2	0	0	157.196	101.642	171.549	0	0	0	37.3058	0	0	0.672692	7.7836	-3.5996	0.011826	0.98499	TRUE	0	8.01046	-5.5504	0.00040124	0.98087	TRUE	0	0.728095	-2.0346	0.6136	0.99144	FALSE
novel_circ_0004085	14	79536122	79536422	+	300	299	ENSMUSG00000036461;	exon:79536123-79536422	CON_1,CON_2,CON_3,HFD_1,HFD_2,HFD_3,HSD_1,HSD_2,HSD_3	8,13,4,20,6,20,9,15,11	35,54,50,52,59,44,37,78,62	Elf1	Winged helix-like DNA-binding domain superfamily||Winged helix DNA-binding domain superfamily||Transcription factor Elf, N-terminal||Ets domain	8	13	4	20	6	20	9	15	11	157.196	220.223	76.2442	281.551	101.107	378.774	167.876	216.538	218.571	10.8387	8.22934	0.39256	0.55345	0.98499	FALSE	14.2237	8.46277	0.73788	0.25808	0.98087	FALSE	14.666	11.5486	0.33817	0.56496	0.99144	FALSE
novel_circ_0013798	7	107681761	107697698	+	15937	131	ENSMUSG00000036528;	exon:107697567-107697698	CON_1,CON_2,CON_3,HFD_1,HFD_2,HFD_3,HSD_1,HSD_2,HSD_3	7,5,6,8,12,9,9,8,9	24,36,23,31,26,18,25,24,25	Ppfibp2	Liprin-beta, SAM domain repeat 1||Sterile alpha motif/pointed domain superfamily||Liprin-beta, SAM domain repeat 3||LAR-interacting protein, Liprin||Liprin-beta, SAM domain repeat 2||Liprin-beta-2||Sterile alpha motif domain	7	5	6	8	12	9	9	8	9	137.546	84.7013	114.366	112.621	202.214	170.448	167.876	115.487	178.83	8.27889	6.09309	0.44086	0.55812	0.98499	FALSE	9.08337	6.26845	0.53439	0.46063	0.98087	FALSE	9.35492	8.84176	0.084453	0.89881	0.99761	FALSE
novel_circ_0004083	14	79399691	79413104	+	13413	224	ENSMUSG00000022022;	exon:79399692-79399799,exon:79412987-79413104	CON_3	2	0	Mtrf1	Peptide chain release factor class I/class II||Peptide chain release factor	0	0	2	0	0	0	0	0	0	0	0	38.1221	0	0	0	0	0	0	0	0.683342	-1.9743	0.6247	0.98499	FALSE	0	0.705644	-2.0441	0.61248	0.98087	FALSE	0	0	NA	NA	NA	NA
novel_circ_0004081	14	79381494	79387106	-	5612	218	ENSMUSG00000022020;	exon:79381495-79381629,exon:79387022-79387106	CON_1,CON_2,CON_3,HFD_1,HFD_2,HFD_3	10,8,3,3,18,4	2,9,4,13,4,2	Naa16	Tetratricopeptide repeat||Tetratricopeptide-like helical domain superfamily||-||N-terminal acetyltransferase A, auxiliary subunit||Tetratricopeptide repeat-containing domain	10	8	3	3	18	4	0	0	0	196.495	135.522	57.1832	42.2327	303.321	75.7547	0	0	0	0	7.06458	-5.3464	0.0015056	0.98499	TRUE	7.90631	7.26061	0.11698	0.88889	0.99903	FALSE	8.13522	0	5.4547	0.00095455	0.99144	TRUE
novel_circ_0004080	14	79374735	79384758	-	10023	223	ENSMUSG00000022020;	exon:79374736-79374855,exon:79384654-79384758	HFD_3	3	7	Naa16	Tetratricopeptide repeat||Tetratricopeptide-like helical domain superfamily||-||N-terminal acetyltransferase A, auxiliary subunit||Tetratricopeptide repeat-containing domain	0	0	0	0	0	3	0	0	0	0	0	0	0	0	56.816	0	0	0	0	0	NA	NA	NA	NA	1.04692	0	2.4455	0.53951	0.98087	FALSE	1.06991	0	2.5177	0.52767	0.99144	FALSE
novel_circ_0013792	7	102460290	102461683	+	1393	225	ENSMUSG00000030978;	exon:102460291-102460440,exon:102461607-102461683	CON_1	7	71	Rrm1	Ribonucleoside-diphosphate reductase large subunit||Ribonucleotide reductase, class I , alpha subunit||Ribonucleotide reductase large subunit, C-terminal||ATP-cone domain||-||Ribonucleotide reductase R1 subunit, N-terminal||Ribonucleotide reductase large subunit, N-terminal	7	0	0	0	0	0	0	0	0	137.546	0	0	0	0	0	0	0	0	0	2.50442	-3.8468	0.27494	0.98499	FALSE	0	2.56836	-3.9074	0.26288	0.98087	FALSE	0	0	NA	NA	NA	NA
novel_circ_0013791	7	102454495	102457639	+	3144	240	ENSMUSG00000030978;	exon:102457152-102457313,exon:102457560-102457639	CON_1,CON_3,HFD_1,HFD_2	4,2,2,4	64,107,127,77	Rrm1	Ribonucleoside-diphosphate reductase large subunit||Ribonucleotide reductase, class I , alpha subunit||Ribonucleotide reductase large subunit, C-terminal||ATP-cone domain||-||Ribonucleotide reductase R1 subunit, N-terminal||Ribonucleotide reductase large subunit, N-terminal	4	0	2	2	4	0	0	0	0	78.5978	0	38.1221	28.1551	67.4047	0	0	0	0	0	2.11444	-3.6027	0.28817	0.98499	FALSE	1.80283	2.17328	-0.25122	0.90126	0.99903	FALSE	1.86254	0	3.3333	0.35543	0.99144	FALSE
novel_circ_0013797	7	107637216	107653232	+	16016	307	ENSMUSG00000036528;	exon:107637217-107637310,exon:107653018-107653232	CON_2,HFD_3	3,2	25,13	Ppfibp2	Liprin-beta, SAM domain repeat 1||Sterile alpha motif/pointed domain superfamily||Liprin-beta, SAM domain repeat 3||LAR-interacting protein, Liprin||Liprin-beta, SAM domain repeat 2||Liprin-beta-2||Sterile alpha motif domain	0	3	0	0	0	2	0	0	0	0	50.8208	0	0	0	37.8774	0	0	0	0	0.923183	-2.4234	0.54478	0.98499	FALSE	0.697949	0.949895	-0.48283	0.89505	0.99903	FALSE	0.713271	0	1.9267	0.63226	0.99144	FALSE
novel_circ_0013795	7	107637213	107653232	+	16019	310	ENSMUSG00000036528;	exon:107637214-107637310,exon:107653018-107653232	CON_1,CON_2,CON_3,HFD_1,HFD_2,HFD_3,HSD_1,HSD_2,HSD_3	18,25,16,19,20,15,22,13,17	12,25,16,10,5,13,20,6,13	Ppfibp2	Liprin-beta, SAM domain repeat 1||Sterile alpha motif/pointed domain superfamily||Liprin-beta, SAM domain repeat 3||LAR-interacting protein, Liprin||Liprin-beta, SAM domain repeat 2||Liprin-beta-2||Sterile alpha motif domain	18	25	16	19	20	15	22	13	17	353.69	423.506	304.977	267.474	337.024	284.08	410.364	187.666	337.791	16.7566	19.5999	-0.24341	0.61148	0.98499	FALSE	16.6523	20.1653	-0.28105	0.537	0.98087	FALSE	17.1714	17.927	-0.047186	0.92275	0.99761	FALSE
novel_circ_0013794	7	107502092	107506618	+	4526	249	ENSMUSG00000062542;	exon:107502093-107502213,exon:107506489-107506618	HFD_2	3	3	Syt9	C2 domain superfamily||C2 domain||Synaptotagmin||Synaptotagmin-9||-	0	0	0	0	3	0	0	0	0	0	0	0	0	50.5536	0	0	0	0	0	0	NA	NA	NA	NA	0.951542	0	2.3196	0.5613	0.98087	FALSE	0.978717	0	2.4003	0.54776	0.99144	FALSE
novel_circ_0004712	15	93410691	93441712	+	31021	302	ENSMUSG00000036167;	exon:93410692-93410783,exon:93441501-93441712	HFD_1	6	10	Pphln1	Periphilin-1	0	0	0	6	0	0	0	0	0	0	0	0	84.4654	0	0	0	0	0	0	0	NA	NA	NA	NA	1.60233	0	3.0852	0.43566	0.98087	FALSE	1.67275	0	3.1861	0.42073	0.99144	FALSE
novel_circ_0007034	19	44934932	44948052	+	13120	122	ENSMUSG00000036097;	exon:44947930-44948052	CON_1,CON_2,CON_3,HFD_1,HFD_2,HSD_1,HSD_2,HSD_3	3,11,9,4,3,2,2,3	15,37,38,28,31,16,31,16	Slf2	FAM178 family||-	3	11	9	4	3	0	2	2	3	58.9484	186.343	171.549	56.3103	50.5536	0	37.3058	28.8717	59.6101	2.24549	7.53337	-1.7702	0.086719	0.98499	FALSE	2.01976	7.75907	-1.9051	0.074905	0.98087	FALSE	2.09388	2.39553	-0.16786	0.92177	0.99761	FALSE
novel_circ_0001336	11	54552789	54568496	+	15707	295	ENSMUSG00000037533;	exon:54552790-54552873,exon:54561325-54561394,exon:54568353-54568496	CON_2,HFD_1	4,2	32,35	Rapgef6	Ras-associating (RA) domain||PDZ domain||Cyclic nucleotide-binding domain||Ras guanine-nucleotide exchange factor catalytic domain superfamily||RmlC-like jelly roll fold||PDZ superfamily||Ras-like guanine nucleotide exchange factor||-||Ubiquitin-like domain superfamily||Ras guanine nucleotide exchange factor domain superfamily||Ras-like guanine nucleotide exchange factor, N-terminal||Ras guanine-…	0	4	0	2	0	0	0	0	0	0	67.761	0	28.1551	0	0	0	0	0	0	1.23091	-2.8357	0.47597	0.98499	FALSE	0.534108	1.26653	-1.221	0.73352	0.98728	FALSE	0.557583	0	1.6184	0.68858	0.99144	FALSE
novel_circ_0001337	11	54740237	54740550	-	313	312	ENSMUSG00000052298;	exon:54740238-54740550	CON_2,HSD_1	2,4	149108	Cdc42se2	CRIB domain superfamily||CDC42 small effector protein||CRIB domain	0	2	0	0	0	0	4	0	0	0	33.8805	0	0	0	0	74.6116	0	0	1.34538	0.615455	1.1003	0.75636	0.99723	FALSE	0	0.633264	-1.9087	0.63725	0.98087	FALSE	0	1.45619	-3.0412	0.44345	0.99144	FALSE
novel_circ_0001335	11	54543578	54568496	+	24918	352	ENSMUSG00000037533;	exon:54543579-54543649,exon:54546373-54546429,exon:54552790-54552873,exon:54568353-54568496	CON_1,CON_2,CON_3,HFD_1,HFD_2,HFD_3,HSD_1,HSD_3	35,17,23,27,31,28,13,21	15,25,22,22,32,16,16,31	Rapgef6	Ras-associating (RA) domain||PDZ domain||Cyclic nucleotide-binding domain||Ras guanine-nucleotide exchange factor catalytic domain superfamily||RmlC-like jelly roll fold||PDZ superfamily||Ras-like guanine nucleotide exchange factor||-||Ubiquitin-like domain superfamily||Ras guanine nucleotide exchange factor domain superfamily||Ras-like guanine nucleotide exchange factor, N-terminal||Ras guanine-…	35	17	23	27	31	28	13	0	21	687.731	287.984	438.404	380.094	522.387	530.283	242.488	0	417.271	11.6484	25.6119	-1.1431	0.39854	0.98499	FALSE	26.8143	26.3394	0.029122	0.9436	0.99903	FALSE	27.6266	12.4634	1.156	0.37449	0.99144	FALSE
novel_circ_0013249	6	29568853	29575152	-	6299	285	ENSMUSG00000012535;	exon:29568854-29568993,exon:29575006-29575152	CON_2,HSD_1	4,5	68,40	Tnpo3	Exportin-1/Importin-beta-like||-||Armadillo-like helical||Armadillo-type fold	0	4	0	0	0	0	5	0	0	0	67.761	0	0	0	0	93.2644	0	0	1.68173	1.23091	0.43627	0.90981	0.9996	FALSE	0	1.26653	-2.901	0.46587	0.98087	FALSE	0	1.82024	-3.3646	0.39506	0.99144	FALSE
novel_circ_0001569	11	76076434	76082684	-	6250	160	ENSMUSG00000017288;	exon:76076435-76076513,exon:76077040-76077122	CON_1,CON_3,HFD_2,HFD_3,HSD_3	6,2,7,4,2	11,28,29,26,25	Vps53	Vps53-like, N-terminal||Vacuolar protein sorting-associated protein 53||-	6	0	2	0	7	4	0	0	2	117.897	0	38.1221	0	117.958	75.7547	0	0	39.7401	0.692946	2.82999	-2.0628	0.40361	0.98499	FALSE	3.61616	2.9071	0.3168	0.83461	0.99903	FALSE	3.71022	0.736264	2.3751	0.26655	0.99144	FALSE
novel_circ_0001568	11	75756816	75759428	+	2612	136	ENSMUSG00000020849;	exon:75759292-75759428	CON_3	3	386	Ywhae	14-3-3 domain||14-3-3 domain superfamily||14-3-3 protein||14-3-3 protein, conserved site||-	0	0	3	0	0	0	0	0	0	0	0	57.1832	0	0	0	0	0	0	0	1.02501	-2.5603	0.52141	0.98499	FALSE	0	1.05847	-2.6303	0.51006	0.98087	FALSE	0	0	NA	NA	NA	NA
novel_circ_0013245	6	29366039	29366977	+	938	226	ENSMUSG00000029767;	exon:29366040-29366206,exon:29366917-29366977	CON_1,CON_2,CON_3,HFD_1,HFD_2,HFD_3,HSD_1,HSD_2,HSD_3	9,6,8,6,4,11,6,9,10	4.17517e+26	Calu	EF-Hand 1, calcium-binding site||EF-hand domain pair||Calumenin||EF-hand domain||-	9	6	8	6	4	11	6	9	10	176.845	101.642	152.488	84.4654	67.4047	208.325	111.917	129.923	198.7	7.88302	7.79971	0.017503	0.98058	0.9996	FALSE	6.70977	8.02454	-0.27097	0.72176	0.9865	FALSE	6.9007	8.39926	-0.29667	0.69451	0.99379	FALSE
novel_circ_0013244	6	29356470	29366977	+	10507	60	ENSMUSG00000029767;	exon:29366917-29366977	CON_2	2	444	Calu	EF-Hand 1, calcium-binding site||EF-hand domain pair||Calumenin||EF-hand domain||-	0	2	0	0	0	0	0	0	0	0	33.8805	0	0	0	0	0	0	0	0	0.615455	-1.8435	0.6488	0.98499	FALSE	0	0.633264	-1.9087	0.63725	0.98087	FALSE	0	0	NA	NA	NA	NA
novel_circ_0013247	6	29451371	29451793	+	422	345	ENSMUSG00000068699;	exon:29451372-29451528,exon:29451604-29451793	HFD_2	3	97	Flnc	Immunoglobulin-like fold||Immunoglobulin E-set||Filamin/ABP280 repeat-like||Filamin/ABP280 repeat||Actinin-type actin-binding domain, conserved site||CH domain superfamily||Calponin homology domain	0	0	0	0	3	0	0	0	0	0	0	0	0	50.5536	0	0	0	0	0	0	NA	NA	NA	NA	0.951542	0	2.3196	0.5613	0.98087	FALSE	0.978717	0	2.4003	0.54776	0.99144	FALSE
novel_circ_0013246	6	29366039	29372670	+	6631	425	ENSMUSG00000029767;	exon:29366040-29366206,exon:29366917-29366977,exon:29372471-29372670	CON_2,CON_3,HFD_1,HFD_3,HSD_1,HSD_2,HSD_3	8,3,5,8,4,6,7	5.0752e+20	Calu	EF-Hand 1, calcium-binding site||EF-hand domain pair||Calumenin||EF-hand domain||-	0	8	3	5	0	8	4	6	7	0	135.522	57.1832	70.3878	0	151.509	74.6116	86.6151	139.09	5.37084	3.48684	0.59692	0.59502	0.98499	FALSE	4.12707	3.59152	0.18649	0.91839	0.99903	FALSE	4.24704	5.72222	-0.43919	0.67754	0.99144	FALSE
novel_circ_0001563	11	75692196	75692562	+	366	365	ENSMUSG00000017776;	exon:75692197-75692562	HFD_1,HSD_2	3,2	135228	Crk	SH3 domain||SH2 domain||SH2 domain superfamily||CRK, N-terminal SH3 domain||SH3-like domain superfamily||CRK, C-terminal SH3 domain	0	0	0	3	0	0	0	2	0	0	0	0	42.2327	0	0	0	28.8717	0	0.53338	0	1.5621	0.70028	0.98499	FALSE	0.801163	0	2.0951	0.6011	0.98087	FALSE	0.836375	0.563036	0.55357	0.88761	0.99761	FALSE
novel_circ_0013243	6	28784080	28795938	+	11858	350	ENSMUSG00000001424;ENSMUSG00000049939;	intron:28784081-28784322,intron:28795829-28795938	CON_2,HFD_1,HFD_3,HSD_1	2,4,5,5	126,61,43,36	Snd1;Lrrc4	-	0	2	0	4	0	5	5	0	0	0	33.8805	0	56.3103	0	94.6934	93.2644	0	0	1.68173	0.615455	1.421	0.67231	0.98499	FALSE	2.81309	0.633264	2.111	0.39684	0.98087	FALSE	2.89834	1.82024	0.68169	0.79585	0.99761	FALSE
novel_circ_0013242	6	28745184	28795938	+	50754	250	ENSMUSG00000001424;	exon:28745185-28745326,exon:28795829-28795938	CON_2	7	223	Snd1	Staphylococcal nuclease (SNase-like), OB-fold||RNA-induced silencing complex, nuclease component Tudor-SN||Tudor domain||Thermonuclease active site||SNase-like, OB-fold superfamily||-	0	7	0	0	0	0	0	0	0	0	118.582	0	0	0	0	0	0	0	0	2.15409	-3.6401	0.32928	0.98499	FALSE	0	2.21642	-3.7055	0.3135	0.98087	FALSE	0	0	NA	NA	NA	NA
novel_circ_0001330	11	54475631	54490938	+	15307	269	ENSMUSG00000035992;	exon:54475632-54475766,exon:54490803-54490938	HFD_3	3	28	Fnip1	Folliculin-interacting protein, N-terminal domain||Tripartite DENN domain, FNIP1/2-type||Folliculin-interacting protein, C-terminal domain||Folliculin-interacting protein family||Folliculin-interacting protein, middle domain	0	0	0	0	0	3	0	0	0	0	0	0	0	0	56.816	0	0	0	0	0	NA	NA	NA	NA	1.04692	0	2.4455	0.53951	0.98087	FALSE	1.06991	0	2.5177	0.52767	0.99144	FALSE
novel_circ_0014924	8	13167157	13167965	+	808	377	ENSMUSG00000031447;	exon:13167158-13167377,exon:13167807-13167965	CON_1,CON_2,CON_3,HFD_1,HFD_2,HFD_3,HSD_1,HSD_2,HSD_3	8,13,17,12,14,21,19,17,10	3.28572e+26	Lamp1	Lysosome-associated membrane glycoprotein, conserved site||Lysosome-associated membrane glycoprotein	8	13	17	12	14	21	19	17	10	157.196	220.223	324.038	168.931	235.917	397.712	354.405	245.409	198.7	14.389	12.6711	0.18125	0.74372	0.99548	FALSE	14.9736	13.0495	0.18218	0.74246	0.99196	FALSE	15.4022	15.384	-0.010585	0.98408	0.99761	FALSE
novel_circ_0013303	6	31449495	31478056	+	28561	142	ENSMUSG00000025609;	exon:31449496-31449573,exon:31451519-31451584	HFD_1,HSD_3	2,4	59,59	Mkln1	Kelch-type beta propeller||Kelch repeat type 1||Galactose-binding-like domain superfamily||Muskelin, N-terminal||LIS1 homology motif||Galactose oxidase/kelch, beta-propeller||CTLH, C-terminal LisH motif	0	0	0	2	0	0	0	0	4	0	0	0	28.1551	0	0	0	0	79.4802	1.38589	0	2.8971	0.46525	0.98499	FALSE	0.534108	0	1.5189	0.70802	0.98087	FALSE	0.557583	1.47253	-1.3581	0.7042	0.99614	FALSE
novel_circ_0013304	6	31468130	31478056	+	9926	341	ENSMUSG00000025609;	exon:31468131-31468343,exon:31477927-31478056	CON_1,HSD_3	4,7	36,65	Mkln1	Kelch-type beta propeller||Kelch repeat type 1||Galactose-binding-like domain superfamily||Muskelin, N-terminal||LIS1 homology motif||Galactose oxidase/kelch, beta-propeller||CTLH, C-terminal LisH motif	4	0	0	0	0	0	0	0	7	78.5978	0	0	0	0	0	0	0	139.09	2.42531	1.4311	0.76211	0.84211	0.9996	FALSE	0	1.46763	-3.0986	0.435	0.98087	FALSE	0	2.57692	-3.8657	0.27189	0.99144	FALSE
novel_circ_0005627	17	43725514	43732013	+	6499	316	ENSMUSG00000023963;	exon:43725515-43725648,exon:43730972-43731067,exon:43731925-43732013	HSD_2,HSD_3	3,2	11,5	Cyp39a1	Cytochrome P450 superfamily||Cytochrome P450, cholesterol 7-alpha-monooxygenase-type||Cytochrome P450||Cytochrome P450, E-class, group IV||Cytochrome P450, E-class, group I	0	0	0	0	0	0	0	3	2	0	0	0	0	0	0	0	43.3075	39.7401	1.49302	0	3.0174	0.41881	0.98499	FALSE	0	0	NA	NA	NA	NA	0	1.58082	-3.1717	0.39917	0.99144	FALSE
novel_circ_0012024	5	134282786	134287043	-	4257	308	ENSMUSG00000060261;	exon:134282787-134282830,exon:134283194-134283248,exon:134286695-134286723,exon:134286860-134287043	CON_1,CON_2,CON_3,HFD_2,HFD_3,HSD_1,HSD_2,HSD_3	8,15,6,5,8,8,7,14	48,104,59,57,56,26,87,84	Gtf2i	-||GTF2I-like repeat||GTF2I-like repeat superfamily||Transcription factor II-I	8	15	6	0	5	8	8	7	14	157.196	254.104	114.366	0	84.2559	151.509	149.223	101.051	278.181	9.40822	9.52814	-0.042179	0.95048	0.9996	FALSE	4.3777	9.80168	-1.2128	0.16876	0.98087	FALSE	4.48428	10.0368	-1.1825	0.28519	0.99144	FALSE
novel_circ_0005049	16	33214341	33216859	+	2518	346	ENSMUSG00000022807;	exon:33214342-33214543,exon:33216714-33216859	CON_3	5	31	Osbpl11	Oxysterol-binding protein, conserved site||Oxysterol-binding protein||Oxysterol-binding protein superfamily||Pleckstrin homology domain||PH-like domain superfamily	0	0	5	0	0	0	0	0	0	0	0	95.3053	0	0	0	0	0	0	0	1.70836	-3.2981	0.40478	0.98499	FALSE	0	1.76411	-3.3683	0.39119	0.98087	FALSE	0	0	NA	NA	NA	NA
novel_circ_0016052	9	59426122	59436915	-	10793	291	ENSMUSG00000025234;	exon:59426123-59426178,exon:59426614-59426706,exon:59436771-59436915	CON_1,CON_2,CON_3,HFD_1,HFD_2,HFD_3,HSD_1,HSD_2,HSD_3	3,7,8,6,6,10,8,11,5	94,45,47,68,55,51,32,70,68	Arih1	Zinc finger, RING/FYVE/PHD-type||IBR domain||E3 ubiquitin-protein ligase ARIH2||-||Zinc finger, RING-type||E3 ubiquitin ligase RBR family	3	7	8	6	6	10	8	11	5	58.9484	118.582	152.488	84.4654	101.107	189.387	149.223	158.794	99.3502	7.35672	5.96079	0.30597	0.7011	0.98546	FALSE	6.99515	6.13973	0.16895	0.83332	0.99903	FALSE	7.19654	7.84974	-0.14769	0.84279	0.99761	FALSE
novel_circ_0001339	11	54740237	54760339	-	20102	158	ENSMUSG00000052298;	exon:54760181-54760339	HFD_1,HSD_1	3,4	45,49	Cdc42se2	CRIB domain superfamily||CDC42 small effector protein||CRIB domain	0	0	0	3	0	0	4	0	0	0	0	0	42.2327	0	0	74.6116	0	0	1.34538	0	2.8571	0.47162	0.98499	FALSE	0.801163	0	2.0951	0.6011	0.98087	FALSE	0.836375	1.45619	-0.76512	0.82124	0.99761	FALSE
novel_circ_0007697	1	170149270	170166948	-	17678	188	ENSMUSG00000026670;	exon:170149271-170149459	HSD_2	4	54	Uap1	Nucleotide-diphospho-sugar transferases||UDPGP family||UDP-sugar pyrophosphorylase	0	0	0	0	0	0	0	4	0	0	0	0	0	0	0	0	57.7434	0	1.06676	0	2.5468	0.52266	0.98499	FALSE	0	0	NA	NA	NA	NA	0	1.12607	-2.6973	0.49846	0.99144	FALSE
novel_circ_0002038	12	110634218	110635744	+	1526	402	ENSMUSG00000018707;	exon:110634219-110634378,exon:110635501-110635744	HFD_2	4	99	Dync1h1	P-loop containing nucleoside triphosphate hydrolase||AAA+ ATPase domain||Dynein heavy chain, coiled coil stalk||Dynein heavy chain, domain-2||Dynein heavy chain, C-terminal domain||Dynein heavy chain, AAA module D4||Dynein heavy chain region D6 P-loop domain||Dynein heavy chain AAA lid domain||Dynein heavy chain, AAA 5 extension domain||Dynein heavy chain, ATP-binding dynein motor region||Dynein …	0	0	0	0	4	0	0	0	0	0	0	0	0	67.4047	0	0	0	0	0	0	NA	NA	NA	NA	1.26872	0	2.7352	0.49101	0.98087	FALSE	1.30496	0	2.8159	0.47832	0.99144	FALSE
novel_circ_0002039	12	110648260	110652194	+	3934	253	ENSMUSG00000018707;	exon:110648261-110648394,exon:110652074-110652194	HSD_2	2	178	Dync1h1	P-loop containing nucleoside triphosphate hydrolase||AAA+ ATPase domain||Dynein heavy chain, coiled coil stalk||Dynein heavy chain, domain-2||Dynein heavy chain, C-terminal domain||Dynein heavy chain, AAA module D4||Dynein heavy chain region D6 P-loop domain||Dynein heavy chain AAA lid domain||Dynein heavy chain, AAA 5 extension domain||Dynein heavy chain, ATP-binding dynein motor region||Dynein …	0	0	0	0	0	0	0	2	0	0	0	0	0	0	0	0	28.8717	0	0.53338	0	1.5621	0.70028	0.98499	FALSE	0	0	NA	NA	NA	NA	0	0.563036	-1.7139	0.67182	0.99144	FALSE
novel_circ_0005029	16	32950291	32959531	+	9240	144	ENSMUSG00000022801;	exon:32950292-32950436	CON_1,HFD_1,HFD_2,HFD_3,HSD_1,HSD_2,HSD_3	4,2,5,5,8,4,3	9.51551e+19	Lrch3	Leucine-rich repeat||-||CH domain superfamily||Calponin homology domain||Leucine-rich repeat, typical subtype||Leucine-rich repeat domain superfamily	4	0	0	2	5	5	8	4	3	78.5978	0	0	28.1551	84.2559	94.6934	149.223	57.7434	59.6101	4.79695	1.4311	1.7752	0.25459	0.98499	FALSE	3.86488	1.46763	1.4169	0.40092	0.98087	FALSE	3.97196	5.14285	-0.38015	0.71432	0.99614	FALSE
novel_circ_0002034	12	110544074	110554896	+	10822	163	ENSMUSG00000017843;	exon:110544075-110544185,exon:110554843-110554896	CON_1,CON_3,HFD_3,HSD_1,HSD_2,HSD_3	2,5,5,3,8,2	29,30,33,34,70,51	Ppp2r5c	-||Protein phosphatase 2A, regulatory B subunit, B56||Armadillo-like helical||Armadillo-type fold	2	0	5	0	0	5	3	8	2	39.2989	0	95.3053	0	0	94.6934	55.9587	115.487	39.7401	3.83551	2.4239	0.68877	0.62892	0.98499	FALSE	1.74487	2.49793	-0.54001	0.80082	0.99903	FALSE	1.78318	4.08055	-1.2503	0.43976	0.99144	FALSE
novel_circ_0005027	16	32950291	32952183	+	1892	270	ENSMUSG00000022801;	exon:32950292-32950436,exon:32952057-32952183	CON_2,HSD_1,HSD_3	2,3,3	135139176	Lrch3	Leucine-rich repeat||-||CH domain superfamily||Calponin homology domain||Leucine-rich repeat, typical subtype||Leucine-rich repeat domain superfamily	0	2	0	0	0	0	3	0	3	0	33.8805	0	0	0	0	55.9587	0	59.6101	2.04846	0.615455	1.6951	0.5544	0.98499	FALSE	0	0.633264	-1.9087	0.63725	0.98087	FALSE	0	2.19654	-3.6342	0.28493	0.99144	FALSE
novel_circ_0005024	16	32842997	32844706	-	1709	159	ENSMUSG00000035629;	exon:32844547-32844706	HSD_2	2	64	Rubcn	Putative zinc-RING and/or ribbon||RUN domain||RUN domain superfamily	0	0	0	0	0	0	0	2	0	0	0	0	0	0	0	0	28.8717	0	0.53338	0	1.5621	0.70028	0.98499	FALSE	0	0	NA	NA	NA	NA	0	0.563036	-1.7139	0.67182	0.99144	FALSE
novel_circ_0002037	12	110545594	110561468	+	15874	262	ENSMUSG00000017843;	exon:110545595-110545687,exon:110561298-110561468	CON_1,CON_3,HFD_2,HSD_1,HSD_2,HSD_3	3,3,4,5,2,4	23,32,44,37,73,40	Ppp2r5c	-||Protein phosphatase 2A, regulatory B subunit, B56||Armadillo-like helical||Armadillo-type fold	3	0	3	0	4	0	5	2	4	58.9484	0	57.1832	0	67.4047	0	93.2644	28.8717	79.4802	3.601	2.09834	0.78559	0.59959	0.98499	FALSE	1.26872	2.15919	-0.76526	0.75617	0.99354	FALSE	1.30496	3.8558	-1.563	0.36827	0.99144	FALSE
novel_circ_0002030	12	109739625	109742290	+	2665	490	ENSMUSG00000097391;	exon:109739626-109739763,exon:109741690-109741815,exon:109742062-109742290	CON_2,CON_3,HFD_2,HFD_3,HSD_1,HSD_2	6,3,4,3,3,10	51,14,30,19,28,33	--	-	0	6	3	0	4	3	3	10	0	0	101.642	57.1832	0	67.4047	56.816	55.9587	144.358	0	3.67594	2.87138	0.36473	0.8089	0.9996	FALSE	2.31565	2.95826	-0.38388	0.81965	0.99903	FALSE	2.37486	3.90732	-0.76057	0.62394	0.99144	FALSE
novel_circ_0007927	1	20520153	20524265	-	4112	143	ENSMUSG00000043760;	exon:20520154-20520297	HSD_2	6	18	Pkhd1	IPT domain||Parallel beta-helix repeat||G8 domain||Immunoglobulin-like fold||PA14/GLEYA domain||Fibrocystin||Immunoglobulin E-set||Pectin lyase fold||Right handed beta helix domain||Pectin lyase fold/virulence factor	0	0	0	0	0	0	0	6	0	0	0	0	0	0	0	0	86.6151	0	1.60014	0	3.126	0.42972	0.98499	FALSE	0	0	NA	NA	NA	NA	0	1.68911	-3.2762	0.40796	0.99144	FALSE
novel_circ_0005020	16	32626548	32628616	+	2068	361	ENSMUSG00000022797;	exon:32626549-32626770,exon:32628476-32628616	CON_2	2	167	Tfrc	Transferrin receptor-like, dimerisation domain||Peptidase M28||Glutamate carboxypeptidase 2-like||PA domain||Transferrin receptor protein 1||-||Transferrin receptor protein 1/2, PA domain||Transferrin receptor-like, dimerisation domain superfamily	0	2	0	0	0	0	0	0	0	0	33.8805	0	0	0	0	0	0	0	0	0.615455	-1.8435	0.6488	0.98499	FALSE	0	0.633264	-1.9087	0.63725	0.98087	FALSE	0	0	NA	NA	NA	NA
novel_circ_0002033	12	110544074	110545901	+	1827	222	ENSMUSG00000017843;	exon:110545595-110545687,exon:110545771-110545901	HSD_3	2	56	Ppp2r5c	-||Protein phosphatase 2A, regulatory B subunit, B56||Armadillo-like helical||Armadillo-type fold	0	0	0	0	0	0	0	0	2	0	0	0	0	0	0	0	0	39.7401	0.692946	0	1.8892	0.63904	0.98499	FALSE	0	0	NA	NA	NA	NA	0	0.736264	-2.0487	0.61104	0.99144	FALSE
novel_circ_0007926	1	20502941	20524265	-	21324	150	ENSMUSG00000043760;	exon:20502942-20503092	CON_2,HFD_2,HSD_2,HSD_3	3,10,8,3	15,33,23,17	Pkhd1	IPT domain||Parallel beta-helix repeat||G8 domain||Immunoglobulin-like fold||PA14/GLEYA domain||Fibrocystin||Immunoglobulin E-set||Pectin lyase fold||Right handed beta helix domain||Pectin lyase fold/virulence factor	0	3	0	0	10	0	0	8	3	0	50.8208	0	0	168.512	0	0	115.487	59.6101	3.17294	0.923183	1.7583	0.42261	0.98499	FALSE	3.17181	0.949895	1.7269	0.65385	0.98087	FALSE	3.26239	3.35654	-0.048209	0.98677	0.99761	FALSE
novel_circ_0009918	3	108115762	108123837	-	8075	170	ENSMUSG00000000001;	exon:108115763-108115891,exon:108123795-108123837	CON_1,HFD_1,HFD_2,HFD_3,HSD_1,HSD_2,HSD_3	6,5,3,8,9,2,4	109,141,120,114,72,131,150	Gnai3	G protein alpha subunit, helical insertion||Guanine nucleotide binding protein (G-protein), alpha subunit||P-loop containing nucleoside triphosphate hydrolase||G-protein alpha subunit, group I	6	0	0	5	3	8	9	2	4	117.897	0	0	70.3878	50.5536	151.509	167.876	28.8717	79.4802	4.94639	2.14665	1.2162	0.50377	0.98499	FALSE	5.07861	2.20145	1.2269	0.37978	0.98087	FALSE	5.22576	5.31199	-0.012319	0.98994	0.99761	FALSE
novel_circ_0009919	3	108118300	108123837	-	5537	340	ENSMUSG00000000001;	exon:108118301-108118458,exon:108123542-108123683,exon:108123795-108123837	HSD_1,HSD_2	5,5	90156	Gnai3	G protein alpha subunit, helical insertion||Guanine nucleotide binding protein (G-protein), alpha subunit||P-loop containing nucleoside triphosphate hydrolase||G-protein alpha subunit, group I	0	0	0	0	0	0	5	5	0	0	0	0	0	0	0	93.2644	72.1792	0	3.01518	0	4.0305	0.16256	0.98499	FALSE	0	0	NA	NA	NA	NA	0	3.22783	-4.1998	0.13284	0.99144	FALSE
novel_circ_0006236	18	35222064	35223575	+	1511	232	ENSMUSG00000037815;	exon:35222065-35222145,exon:35223423-35223575	CON_1,CON_2,CON_3,HFD_1,HFD_2,HFD_3,HSD_1,HSD_2	5,9,4,3,3,4,3,2	1.77234e+23	Ctnna1	Vinculin, conserved site||Alpha-catenin||-||Vinculin/alpha-catenin||Alpha-catenin/vinculin-like superfamily	5	9	4	3	3	4	3	2	0	98.2473	152.462	76.2442	42.2327	50.5536	75.7547	55.9587	28.8717	0	1.54242	5.92511	-1.9375	0.12803	0.98499	FALSE	3.1486	6.09552	-0.97243	0.32564	0.98087	FALSE	3.24163	1.65518	0.96208	0.55268	0.99144	FALSE
novel_circ_0007921	1	20347210	20364231	-	17021	463	ENSMUSG00000043760;	exon:20347211-20347457,exon:20360986-20361091,exon:20364119-20364231	HFD_2	4	9	Pkhd1	IPT domain||Parallel beta-helix repeat||G8 domain||Immunoglobulin-like fold||PA14/GLEYA domain||Fibrocystin||Immunoglobulin E-set||Pectin lyase fold||Right handed beta helix domain||Pectin lyase fold/virulence factor	0	0	0	0	4	0	0	0	0	0	0	0	0	67.4047	0	0	0	0	0	0	NA	NA	NA	NA	1.26872	0	2.7352	0.49101	0.98087	FALSE	1.30496	0	2.8159	0.47832	0.99144	FALSE
novel_circ_0009914	3	106566044	106575897	+	9853	450	n/a	intergenic_region:106566045-106566184,intergenic_region:106570693-106570870,intergenic_region:106575763-106575897	CON_1,HSD_2	4,8	7,22	--	-	4	0	0	0	0	0	0	8	0	78.5978	0	0	0	0	0	0	115.487	0	2.13352	1.4311	0.59198	0.87718	0.9996	FALSE	0	1.46763	-3.0986	0.435	0.98087	FALSE	0	2.25214	-3.6893	0.32219	0.99144	FALSE
novel_circ_0006235	18	35174252	35182553	+	8301	369	ENSMUSG00000037815;	exon:35174253-35174419,exon:35182350-35182553	CON_3,HSD_2	2,3	217362	Ctnna1	Vinculin, conserved site||Alpha-catenin||-||Vinculin/alpha-catenin||Alpha-catenin/vinculin-like superfamily	0	0	2	0	0	0	0	3	0	0	0	38.1221	0	0	0	0	43.3075	0	0.800071	0.683342	0.25699	0.94611	0.9996	FALSE	0	0.705644	-2.0441	0.61248	0.98087	FALSE	0	0.844554	-2.2881	0.56827	0.99144	FALSE
novel_circ_0000006	10	105303593	105323637	-	20044	284	ENSMUSG00000036019;	exon:105303594-105303715,exon:105321396-105321474,exon:105323552-105323637	CON_1,CON_2	5,2	11,11	Tmtc2	Tetratricopeptide repeat 1||Tetratricopeptide repeat-containing domain||Domain of unknown function DUF1736||Tetratricopeptide repeat||Tetratricopeptide-like helical domain superfamily	5	2	0	0	0	0	0	0	0	98.2473	33.8805	0	0	0	0	0	0	0	0	2.40433	-3.7902	0.24059	0.98499	FALSE	0	2.46781	-3.852	0.22811	0.98087	FALSE	0	0	NA	NA	NA	NA
novel_circ_0009913	3	106566044	106573841	+	7797	139	ENSMUSG00000027900;	exon:106566045-106566184	CON_1,CON_2,HSD_1,HSD_2,HSD_3	3,3,2,2,3	13,17,11,26,14	Dram2	Frag1/DRAM/Sfk1||DNA damage-regulated autophagy modulator protein 2	3	3	0	0	0	0	2	2	3	58.9484	50.8208	0	0	0	0	37.3058	28.8717	59.6101	2.24549	1.99651	0.16144	0.92771	0.9996	FALSE	0	2.05062	-3.5877	0.29018	0.98087	FALSE	0	2.39553	-3.7639	0.20474	0.99144	FALSE
novel_circ_0006230	18	35137984	35154540	+	16556	136	ENSMUSG00000037815;	exon:35137985-35138121	CON_1,HFD_1	3,2	97134	Ctnna1	Vinculin, conserved site||Alpha-catenin||-||Vinculin/alpha-catenin||Alpha-catenin/vinculin-like superfamily	3	0	0	2	0	0	0	0	0	58.9484	0	0	28.1551	0	0	0	0	0	0	1.07332	-2.6209	0.51123	0.98499	FALSE	0.534108	1.10073	-0.99971	0.78547	0.99903	FALSE	0.557583	0	1.6184	0.68858	0.99144	FALSE
novel_circ_0009911	3	106514454	106539603	-	25149	222	ENSMUSG00000040774;	intron:106514455-106514593,intron:106520009-106520093	HSD_2	2	18	Cept1	Choline/ethanolamine phosphotransferase||CDP-alcohol phosphatidyltransferase||-	0	0	0	0	0	0	0	2	0	0	0	0	0	0	0	0	28.8717	0	0.53338	0	1.5621	0.70028	0.98499	FALSE	0	0	NA	NA	NA	NA	0	0.563036	-1.7139	0.67182	0.99144	FALSE
novel_circ_0005128	16	41914589	41921494	-	6905	116	ENSMUSG00000061080;	intron:41921378-41921494	CON_3	3	3	Lsamp	Immunoglobulin-like domain||Immunoglobulin-like domain superfamily||Immunoglobulin subtype 2||Immunoglobulin I-set||Immunoglobulin subtype||Immunoglobulin-like fold	0	0	3	0	0	0	0	0	0	0	0	57.1832	0	0	0	0	0	0	0	1.02501	-2.5603	0.52141	0.98499	FALSE	0	1.05847	-2.6303	0.51006	0.98087	FALSE	0	0	NA	NA	NA	NA
novel_circ_0007923	1	20373855	20377500	-	3645	311	ENSMUSG00000043760;	exon:20373856-20373986,exon:20374712-20374768,exon:20377375-20377500	CON_1,HFD_1,HFD_3,HSD_2,HSD_3	2,4,4,2,3	9,6,19,23,11	Pkhd1	IPT domain||Parallel beta-helix repeat||G8 domain||Immunoglobulin-like fold||PA14/GLEYA domain||Fibrocystin||Immunoglobulin E-set||Pectin lyase fold||Right handed beta helix domain||Pectin lyase fold/virulence factor	2	0	0	4	0	4	0	2	3	39.2989	0	0	56.3103	0	75.7547	0	28.8717	59.6101	1.5728	0.71555	1.1541	0.70467	0.98713	FALSE	2.46411	0.733817	1.7706	0.49698	0.98087	FALSE	2.54171	1.66743	0.6079	0.75544	0.99761	FALSE
novel_circ_0000766	11	101033900	101044623	+	10723	107	ENSMUSG00000019302;	exon:101044516-101044623	HSD_2	2	98	Atp6v0a1	ATPase, V0 complex, subunit 116kDa, eukaryotic||V-type ATPase, V0 complex, 116kDa subunit family	0	0	0	0	0	0	0	2	0	0	0	0	0	0	0	0	28.8717	0	0.53338	0	1.5621	0.70028	0.98499	FALSE	0	0	NA	NA	NA	NA	0	0.563036	-1.7139	0.67182	0.99144	FALSE
novel_circ_0000767	11	101055025	101055605	+	580	288	ENSMUSG00000019302;	exon:101055026-101055143,exon:101055434-101055605	CON_1,CON_2,CON_3,HFD_1,HFD_2,HFD_3,HSD_2	2,6,2,9,2,3,2	21,90,44,54,55,35,62	Atp6v0a1	ATPase, V0 complex, subunit 116kDa, eukaryotic||V-type ATPase, V0 complex, 116kDa subunit family	2	6	2	9	2	3	0	2	0	39.2989	101.642	38.1221	126.698	33.7024	56.816	0	28.8717	0	0.53338	3.24526	-2.5168	0.2456	0.98499	FALSE	4.08477	3.33925	0.29505	0.80119	0.99903	FALSE	4.23151	0.563036	2.7979	0.14123	0.99144	FALSE
novel_circ_0000765	11	100907990	100911384	-	3394	248	ENSMUSG00000004040;	exon:100907991-100908089,exon:100911234-100911384	HSD_3	3	154	Stat3	p53-like transcription factor, DNA-binding||STAT transcription factor, coiled coil||STAT transcription factor, DNA-binding, N-terminal||SH2 domain superfamily||STAT transcription factor, DNA-binding||STAT transcription factor, all-alpha domain||STAT transcription factor, N-terminal domain superfamily||Transcription factor STAT||STAT3, SH2 domain||SH2 domain||STAT transcription factor, protein int…	0	0	0	0	0	0	0	0	3	0	0	0	0	0	0	0	0	59.6101	1.03942	0	2.4794	0.53409	0.98499	FALSE	0	0	NA	NA	NA	NA	0	1.1044	-2.6386	0.50819	0.99144	FALSE
novel_circ_0000761	11	100589897	100596240	-	6343	283	ENSMUSG00000014195;	exon:100589898-100589989,exon:100592855-100592973,exon:100596166-100596240	HFD_1	5	9	Dnajc7	Chaperone J-domain superfamily||Tetratricopeptide repeat||Tetratricopeptide repeat 2||Tetratricopeptide-like helical domain superfamily||DnaJ domain||Tetratricopeptide repeat-containing domain	0	0	0	5	0	0	0	0	0	0	0	0	70.3878	0	0	0	0	0	0	0	NA	NA	NA	NA	1.33527	0	2.8242	0.47659	0.98087	FALSE	1.39396	0	2.925	0.46093	0.99144	FALSE
novel_circ_0000768	11	101216994	101218720	-	1726	319	ENSMUSG00000006920;	exon:101216995-101217123,exon:101217243-101217368,exon:101218654-101218720	CON_2,HFD_2,HFD_3,HSD_2,HSD_3	2,2,5,3,5	20,32,26,57,39	Ezh1	Histone-lysine N-methyltransferase EZH1||Polycomb repressive complex 2 subunit EZH1/EZH2, tri-helical domain||SANT/Myb domain||Tesmin/TSO1-like CXC domain||CXC domain||Histone-lysine N-methyltransferase EZH1/EZH2||SET domain||Pre-SET CXC domain	0	2	0	0	2	5	0	3	5	0	33.8805	0	0	33.7024	94.6934	0	43.3075	99.3502	2.53244	0.615455	2.0047	0.44611	0.98499	FALSE	2.37923	0.633264	1.8659	0.49387	0.98087	FALSE	2.43566	2.68521	-0.16148	0.92647	0.99761	FALSE
novel_circ_0000769	11	101263768	101265463	+	1695	216	ENSMUSG00000035112;	exon:101265247-101265463	CON_3	3	10	Wnk4	Protein kinase-like domain superfamily||Serine/threonine-protein kinase OSR1/WNK, CCT domain||-||Serine/threonine-protein kinase, active site||Protein kinase domain	0	0	3	0	0	0	0	0	0	0	0	57.1832	0	0	0	0	0	0	0	1.02501	-2.5603	0.52141	0.98499	FALSE	0	1.05847	-2.6303	0.51006	0.98087	FALSE	0	0	NA	NA	NA	NA
novel_circ_0012309	5	23616326	23629477	-	13151	379	ENSMUSG00000062604;	exon:23616327-23616390,exon:23620755-23620926,exon:23629332-23629477	CON_1,CON_3,HFD_1,HSD_1	3,8,4,4	2,0,1,9	Srpk2	Protein kinase-like domain superfamily||Protein kinase domain||-||Serine/threonine-protein kinase, active site||Protein kinase, ATP binding site	3	0	8	4	0	0	4	0	0	58.9484	0	152.488	56.3103	0	0	74.6116	0	0	1.34538	3.80669	-1.5105	0.56923	0.98499	FALSE	1.06822	3.9233	-1.8384	0.46631	0.98087	FALSE	1.11517	1.45619	-0.35285	0.91243	0.99761	FALSE
novel_circ_0012308	5	23546979	23565265	-	18286	346	ENSMUSG00000062604;	exon:23546980-23547067,exon:23548455-23548563,exon:23565114-23565265	HFD_1	3	23	Srpk2	Protein kinase-like domain superfamily||Protein kinase domain||-||Serine/threonine-protein kinase, active site||Protein kinase, ATP binding site	0	0	0	3	0	0	0	0	0	0	0	0	42.2327	0	0	0	0	0	0	0	NA	NA	NA	NA	0.801163	0	2.0951	0.6011	0.98087	FALSE	0.836375	0	2.1951	0.58373	0.99144	FALSE
novel_circ_0012306	5	23540374	23548563	-	8189	128	ENSMUSG00000062604;	exon:23540375-23540503	CON_1,CON_2,CON_3,HFD_1,HFD_2,HFD_3,HSD_1,HSD_2,HSD_3	4,7,2,16,5,6,4,11,2	16,13,12,18,9,23,9,16,9	Srpk2	Protein kinase-like domain superfamily||Protein kinase domain||-||Serine/threonine-protein kinase, active site||Protein kinase, ATP binding site	4	7	2	16	5	6	4	11	2	78.5978	118.582	38.1221	225.241	84.2559	113.632	74.6116	158.794	39.7401	4.97192	4.26854	0.23555	0.81988	0.9996	FALSE	7.95262	4.3897	0.86119	0.31673	0.98087	FALSE	8.23167	5.28915	0.61942	0.46114	0.99144	FALSE
novel_circ_0015244	8	77382724	77420747	-	38023	324	ENSMUSG00000037148;	exon:77382725-77382790,exon:77384751-77384796,exon:77420072-77420176,exon:77420637-77420747	CON_1,CON_2,CON_3,HFD_1,HFD_2,HFD_3,HSD_1,HSD_2,HSD_3	7,10,9,21,13,15,33,10,4	1.44198e+26	Arhgap10	Rho GTPase-activating protein 10||PH-like domain superfamily||GRAF2, SH3 domain||Rho GTPase activation protein||Rho GTPase-activating protein domain||SH3 domain||Pleckstrin homology domain||AH/BAR domain superfamily||SH3-like domain superfamily	7	10	9	21	13	15	33	10	4	137.546	169.403	171.549	295.629	219.065	284.08	615.545	144.358	79.4802	15.1522	8.65674	0.8017	0.36253	0.98499	FALSE	14.9661	8.91008	0.74783	0.19179	0.98087	FALSE	15.4453	16.3013	-0.070571	0.93427	0.99761	FALSE
novel_circ_0012302	5	23482401	23492432	+	10031	273	ENSMUSG00000029004;	exon:23482402-23482511,exon:23492268-23492432	CON_1,HFD_1,HSD_2,HSD_3	2,2,4,4	13,14,31,23	Kmt2e	Zinc finger, PHD-type, conserved site||Zinc finger, RING/FYVE/PHD-type||Zinc finger, FYVE/PHD-type||Inactive histone-lysine N-methyltransferase 2E||Zinc finger, PHD-type||Zinc finger, PHD-finger||SET domain||-	2	0	0	2	0	0	0	4	4	39.2989	0	0	28.1551	0	0	0	57.7434	79.4802	2.45265	0.71555	1.8043	0.48916	0.98499	FALSE	0.534108	0.733817	-0.41368	0.91416	0.99903	FALSE	0.557583	2.5986	-2.1684	0.41189	0.99144	FALSE
novel_circ_0012301	5	23482401	23486400	+	3999	98	ENSMUSG00000029004;	exon:23486302-23486400	HSD_2	3	28	Kmt2e	Zinc finger, PHD-type, conserved site||Zinc finger, RING/FYVE/PHD-type||Zinc finger, FYVE/PHD-type||Inactive histone-lysine N-methyltransferase 2E||Zinc finger, PHD-type||Zinc finger, PHD-finger||SET domain||-	0	0	0	0	0	0	0	3	0	0	0	0	0	0	0	0	43.3075	0	0.800071	0	2.1371	0.59397	0.98499	FALSE	0	0	NA	NA	NA	NA	0	0.844554	-2.2881	0.56827	0.99144	FALSE
novel_circ_0006649	18	9962372	9970328	+	7956	368	ENSMUSG00000024287;	exon:9962373-9962491,exon:9963823-9963918,exon:9968751-9968833,exon:9970255-9970328	CON_1,HFD_1,HFD_2,HFD_3,HSD_1,HSD_2,HSD_3	6,8,10,8,4,12,3	12,13,7,4,9,11,5	Thoc1	Death-like domain superfamily||Death domain||THO complex, subunit THOC1	6	0	0	8	10	8	4	12	3	117.897	0	0	112.621	168.512	151.509	74.6116	173.23	59.6101	5.58508	2.14665	1.4071	0.40722	0.98499	FALSE	8.10004	2.20145	1.9021	0.20388	0.98087	FALSE	8.34581	5.9388	0.45521	0.55985	0.99144	FALSE
novel_circ_0006648	18	9840238	9849150	+	8912	122	ENSMUSG00000036103;	exon:9840239-9840361	CON_1,CON_2,HFD_1,HFD_2,HFD_3,HSD_2,HSD_3	3,2,10,7,6,5,5	1.15215e+20	Colec12	C-type lectin-like/link domain superfamily||CD209-like, C-type lectin-like domain||C-type lectin, conserved site||-||C-type lectin-like||C-type lectin fold||Collagen triple helix repeat	3	2	0	10	7	6	0	5	5	58.9484	33.8805	0	140.776	117.958	113.632	0	72.1792	99.3502	3.06582	1.68878	0.86712	0.6333	0.98499	FALSE	6.98465	1.73399	2.0193	0.077069	0.98087	FALSE	7.2114	3.24825	1.1416	0.2531	0.99144	FALSE
novel_circ_0006114	18	20574939	20580678	+	5739	166	ENSMUSG00000044393;	exon:20580512-20580678	HFD_2,HSD_1	2,5	78,81	Dsg2	Desmosomal cadherin||Cadherin conserved site||Cadherin-like superfamily||Cadherin-like||Desmoglein	0	0	0	0	2	0	5	0	0	0	0	0	0	33.7024	0	93.2644	0	0	1.68173	0	3.1802	0.42154	0.98499	FALSE	0.634361	0	1.7334	0.66753	0.98087	FALSE	0.652478	1.82024	-1.4766	0.65457	0.99144	FALSE
novel_circ_0000828	11	104658722	104667213	+	8489	353	ENSMUSG00000020689;	exon:104658723-104658945,exon:104667080-104667211	HFD_1	2	173	Itgb3	Integrin domain superfamily||Integrin beta, epidermal growth factor-like domain 1||Integrin beta subunit||von Willebrand factor A-like domain superfamily||Integrin beta subunit, cytoplasmic domain||EGF-like domain, extracellular||PSI domain||Integrin beta N-terminal||Integrin beta tail domain superfamily||Integrin beta subunit, VWA domain||Integrin beta-3 subunit||Integrin beta subunit, tail	0	0	0	2	0	0	0	0	0	0	0	0	28.1551	0	0	0	0	0	0	0	NA	NA	NA	NA	0.534108	0	1.5189	0.70802	0.98087	FALSE	0.557583	0	1.6184	0.68858	0.99144	FALSE
novel_circ_0013876	7	114226602	114227174	-	572	406	ENSMUSG00000030754;	exon:114226603-114226782,exon:114226947-114227174	CON_2,CON_3,HFD_1,HFD_2,HFD_3,HSD_1,HSD_2,HSD_3	8,6,4,10,5,3,7,2	71,59,50,63,30,46,62,45	Copb1	Armadillo-like helical||Clathrin/coatomer adaptor, adaptin-like, N-terminal||Coatomer beta subunit (COPB1)||Armadillo-type fold||Coatomer beta subunit, appendage platform domain||Coatomer beta subunit, C-terminal	0	8	6	4	10	5	3	7	2	0	135.522	114.366	56.3103	168.512	94.6934	55.9587	101.051	39.7401	3.56882	4.51185	-0.33328	0.78232	0.99898	FALSE	5.9849	4.64999	0.34208	0.73299	0.98728	FALSE	6.16073	3.79903	0.66641	0.49683	0.99144	FALSE
novel_circ_0013877	7	114240624	114246842	-	6218	343	ENSMUSG00000030754;	exon:114240625-114240762,exon:114245424-114245516,exon:114246728-114246842	CON_1,CON_2,HFD_1,HFD_2,HFD_3,HSD_1,HSD_2,HSD_3	2,5,5,6,3,8,9,6	30,64,53,32,30,28,71,51	Copb1	Armadillo-like helical||Clathrin/coatomer adaptor, adaptin-like, N-terminal||Coatomer beta subunit (COPB1)||Armadillo-type fold||Coatomer beta subunit, appendage platform domain||Coatomer beta subunit, C-terminal	2	5	0	5	6	3	8	9	6	39.2989	84.7013	0	70.3878	101.107	56.816	149.223	129.923	119.22	7.16982	2.25419	1.6466	0.12954	0.98499	FALSE	4.28528	2.31698	0.87111	0.51136	0.98087	FALSE	4.4213	7.65483	-0.78879	0.34731	0.99144	FALSE
novel_circ_0013872	7	114047453	114060419	-	12966	358	ENSMUSG00000055723;	exon:114047454-114047623,exon:114058927-114059029,exon:114060332-114060419	CON_3,HFD_1,HFD_2,HFD_3,HSD_2,HSD_3	6,3,4,2,2,2	76,129,89,105,116,89	Rras2	Small GTPase||P-loop containing nucleoside triphosphate hydrolase||Small GTP-binding protein domain||-||Small GTPase superfamily, Ras-type	0	0	6	3	4	2	0	2	2	0	0	114.366	42.2327	67.4047	37.8774	0	28.8717	39.7401	1.22633	2.05003	-0.73492	0.77353	0.99898	FALSE	2.76783	2.11693	0.39366	0.82437	0.99903	FALSE	2.8546	1.2993	1.1263	0.5346	0.99144	FALSE
novel_circ_0013873	7	114050300	114060419	-	10119	205	ENSMUSG00000055723;	exon:114050301-114050419,exon:114060332-114060419	CON_1,CON_2,HFD_1,HFD_3,HSD_1,HSD_2	5,4,5,2,9,4	2.00162e+17	Rras2	Small GTPase||P-loop containing nucleoside triphosphate hydrolase||Small GTP-binding protein domain||-||Small GTPase superfamily, Ras-type	5	4	0	5	0	2	9	4	0	98.2473	67.761	0	70.3878	0	37.8774	167.876	57.7434	0	4.09387	3.01978	0.43913	0.80374	0.9996	FALSE	2.03322	3.10107	-0.59262	0.72862	0.98723	FALSE	2.10723	4.4025	-1.0419	0.49531	0.99144	FALSE
novel_circ_0013871	7	114046646	114060419	-	13773	293	n/a	intergenic_region:114046647-114046751,intergenic_region:114058927-114059029,intergenic_region:114060332-114060419	CON_1,CON_2,CON_3,HFD_1,HSD_1,HSD_2,HSD_3	3,10,10,6,4,2,2	77,58,54,105,61,86,69	--	-	3	10	10	6	0	0	4	2	2	58.9484	169.403	190.611	84.4654	0	0	74.6116	28.8717	39.7401	2.57171	7.56731	-1.5795	0.11595	0.98499	FALSE	1.60233	7.79527	-2.2223	0.13711	0.98087	FALSE	1.67275	2.75549	-0.67455	0.72259	0.99614	FALSE
novel_circ_0004861	16	16114826	16118983	-	4157	330	ENSMUSG00000041974;	exon:16114827-16114981,exon:16118807-16118983	CON_2,CON_3,HFD_1,HFD_3,HSD_2	5,2,4,3,4	15,15,28,8,24	Spidr	Domain of unknown function DUF4503||Domain of unknown function DUF4502	0	5	2	4	0	3	0	4	0	0	84.7013	38.1221	56.3103	0	56.816	0	57.7434	0	1.06676	2.22198	-1.0253	0.68403	0.98499	FALSE	2.11514	2.2888	-0.12387	0.94724	0.99903	FALSE	2.18507	1.12607	0.91428	0.71687	0.99614	FALSE
novel_circ_0004863	16	16225300	16230776	+	5476	247	ENSMUSG00000041957;	exon:16225301-16225413,exon:16230641-16230776	CON_1,CON_2,CON_3,HFD_1,HFD_2,HFD_3,HSD_1,HSD_2,HSD_3	17,16,11,16,10,16,16,18,11	71,102,105,79,74,71,85,98,69	Pkp2	Armadillo-type fold||Armadillo-like helical||Plakophilin/Delta catenin||Armadillo	17	16	11	16	10	16	16	18	11	334.041	271.044	209.672	225.241	168.512	303.019	298.446	259.845	218.571	13.9932	14.7642	-0.073539	0.88802	0.9996	FALSE	13.0283	15.1846	-0.22464	0.67173	0.98087	FALSE	13.4292	14.9415	-0.15931	0.76353	0.99761	FALSE
novel_circ_0004862	16	16114826	16140863	-	26037	154	ENSMUSG00000041974;	exon:16114827-16114981	CON_2,CON_3,HFD_1,HFD_2,HSD_1,HSD_2,HSD_3	6,3,6,2,4,5,4	21,11,22,21,10,21,13	Spidr	Domain of unknown function DUF4503||Domain of unknown function DUF4502	0	6	3	6	2	0	4	5	4	0	101.642	57.1832	84.4654	33.7024	0	74.6116	72.1792	79.4802	4.06473	2.87138	0.48222	0.70853	0.98774	FALSE	2.23669	2.95826	-0.38787	0.81918	0.99903	FALSE	2.32523	4.33631	-0.86077	0.51778	0.99144	FALSE
novel_circ_0004865	16	16230640	16247043	+	16403	312	ENSMUSG00000041957;	exon:16230641-16230776,exon:16246866-16247043	CON_1,CON_2,CON_3,HFD_1,HFD_2,HFD_3,HSD_1,HSD_2,HSD_3	25,25,29,36,8,15,19,10,5	45,68,50,50,46,52,58,50,37	Pkp2	Armadillo-type fold||Armadillo-like helical||Plakophilin/Delta catenin||Armadillo	25	25	29	36	8	15	19	10	5	491.236	423.506	552.771	506.792	134.809	284.08	354.405	144.358	99.3502	10.7898	26.546	-1.306	0.010588	0.98499	TRUE	17.386	27.3204	-0.63204	0.17751	0.98087	FALSE	17.9959	11.5727	0.64991	0.39434	0.99144	FALSE
novel_circ_0004864	16	16225300	16247043	+	21743	289	ENSMUSG00000041957;	exon:16225301-16225413,exon:16246866-16247043	CON_2,HFD_2,HSD_2	2,3,5	95,68,71	Pkp2	Armadillo-type fold||Armadillo-like helical||Plakophilin/Delta catenin||Armadillo	0	2	0	0	3	0	0	5	0	0	33.8805	0	0	50.5536	0	0	72.1792	0	1.33345	0.615455	1.1136	0.75331	0.9963	FALSE	0.951542	0.633264	0.5652	0.87837	0.99903	FALSE	0.978717	1.40759	-0.54947	0.86851	0.99761	FALSE
novel_circ_0004867	16	16453991	16462059	-	8068	230	ENSMUSG00000022788;	exon:16453992-16454164,exon:16462001-16462059	HFD_2	4	29	Fgd4	Dbl homology (DH) domain||Dbl homology (DH) domain superfamily||Pleckstrin homology domain||Zinc finger C2H2-type||PH-like domain superfamily||FYVE zinc finger||Zinc finger, FYVE/PHD-type||Zinc finger, FYVE-related||Zinc finger, RING/FYVE/PHD-type||FGD4, N-terminal PH domain||FGD1-4, C-terminal PH domain	0	0	0	0	4	0	0	0	0	0	0	0	0	67.4047	0	0	0	0	0	0	NA	NA	NA	NA	1.26872	0	2.7352	0.49101	0.98087	FALSE	1.30496	0	2.8159	0.47832	0.99144	FALSE
novel_circ_0004866	16	16246466	16247043	+	577	328	ENSMUSG00000041957;	intron:16246467-16246618,intron:16246866-16247043	HFD_1,HSD_1,HSD_2,HSD_3	2,5,4,4	25,25,15,18	Pkp2	Armadillo-type fold||Armadillo-like helical||Plakophilin/Delta catenin||Armadillo	0	0	0	2	0	0	5	4	4	0	0	0	28.1551	0	0	93.2644	57.7434	79.4802	4.13438	0	4.4806	0.03682	0.98499	TRUE	0.534108	0	1.5189	0.70802	0.98087	FALSE	0.557583	4.41884	-2.8859	0.11536	0.99144	FALSE
novel_circ_0004869	16	16461593	16477513	-	15920	204	ENSMUSG00000022788;	exon:16461594-16461740,exon:16462001-16462059	CON_2	3	35	Fgd4	Dbl homology (DH) domain||Dbl homology (DH) domain superfamily||Pleckstrin homology domain||Zinc finger C2H2-type||PH-like domain superfamily||FYVE zinc finger||Zinc finger, FYVE/PHD-type||Zinc finger, FYVE-related||Zinc finger, RING/FYVE/PHD-type||FGD4, N-terminal PH domain||FGD1-4, C-terminal PH domain	0	3	0	0	0	0	0	0	0	0	50.8208	0	0	0	0	0	0	0	0	0.923183	-2.4234	0.54478	0.98499	FALSE	0	0.949895	-2.4887	0.534	0.98087	FALSE	0	0	NA	NA	NA	NA
novel_circ_0003077	13	48921681	48934078	-	12397	283	ENSMUSG00000038014;	exon:48921682-48921965	CON_3,HFD_2,HSD_3	2,2,2	139113116	Fam120a	PIN-like domain superfamily||Constitutive coactivator of PPAR-gamma	0	0	2	0	2	0	0	0	2	0	0	38.1221	0	33.7024	0	0	0	39.7401	0.692946	0.683342	0.0059031	0.99878	0.9996	FALSE	0.634361	0.705644	-0.15352	0.96785	0.99903	FALSE	0.652478	0.736264	-0.16152	0.96726	0.99761	FALSE
novel_circ_0008969	2	156223334	156251947	+	28613	285	ENSMUSG00000038116;	exon:156223335-156223449,exon:156251776-156251947	CON_1,CON_2,CON_3,HFD_1,HSD_3	5,10,3,9,3	28,32,14,26,23	Phf20	DNA repair protein Crb2, Tudor domain||Mbt repeat||Zinc finger C2H2-type||PHD finger protein 20||Zinc finger, PHD-type||Tudor domain||Zinc finger, FYVE/PHD-type||Zinc finger, RING/FYVE/PHD-type||Zinc finger, PHD-type, conserved site||Domain of unknown function DUF3776	5	10	3	9	0	0	0	0	3	98.2473	169.403	57.1832	126.698	0	0	0	0	59.6101	1.03942	5.89116	-2.5752	0.084305	0.98499	FALSE	2.40349	6.05933	-1.3022	0.44975	0.98087	FALSE	2.50912	1.1044	1.2018	0.75458	0.99761	FALSE
novel_circ_0003075	13	48912856	48914949	-	2093	314	ENSMUSG00000038014;	exon:48912857-48913084,exon:48914862-48914949	HFD_1	2	134	Fam120a	PIN-like domain superfamily||Constitutive coactivator of PPAR-gamma	0	0	0	2	0	0	0	0	0	0	0	0	28.1551	0	0	0	0	0	0	0	NA	NA	NA	NA	0.534108	0	1.5189	0.70802	0.98087	FALSE	0.557583	0	1.6184	0.68858	0.99144	FALSE
novel_circ_0003074	13	48902057	48914949	-	12892	336	ENSMUSG00000038014;	exon:48902058-48902307,exon:48914862-48914949	CON_1,CON_2,HFD_3,HSD_1	2,2,3,3	123287151144	Fam120a	PIN-like domain superfamily||Constitutive coactivator of PPAR-gamma	2	2	0	0	0	3	3	0	0	39.2989	33.8805	0	0	0	56.816	55.9587	0	0	1.00904	1.33101	-0.41342	0.89065	0.9996	FALSE	1.04692	1.36708	-0.41077	0.89004	0.99903	FALSE	1.06991	1.09214	-0.034552	0.99207	0.99761	FALSE
novel_circ_0003073	13	48897659	48914949	-	17290	114	ENSMUSG00000038014;	exon:48897660-48897774	CON_2,CON_3	3,2	319164	Fam120a	PIN-like domain superfamily||Constitutive coactivator of PPAR-gamma	0	3	2	0	0	0	0	0	0	0	50.8208	38.1221	0	0	0	0	0	0	0	1.60653	-3.215	0.38144	0.98499	FALSE	0	1.65554	-3.2824	0.36056	0.98087	FALSE	0	0	NA	NA	NA	NA
novel_circ_0011659	4	98638690	98652558	+	13868	225	ENSMUSG00000061859;	exon:98638691-98638762,exon:98652404-98652558	HFD_3,HSD_2	4,2	32,24	Patj	PDZ superfamily||L27 domain superfamily||L27 domain||L27-2||PDZ domain	0	0	0	0	0	4	0	2	0	0	0	0	0	0	75.7547	0	28.8717	0	0.53338	0	1.5621	0.70028	0.98499	FALSE	1.3959	0	2.864	0.47022	0.98087	FALSE	1.42654	0.563036	1.2862	0.72126	0.99614	FALSE
novel_circ_0003071	13	48885272	48885878	-	606	237	ENSMUSG00000038014;	exon:48885273-48885369,exon:48885737-48885878	CON_1,CON_2,CON_3,HFD_1,HFD_2,HFD_3,HSD_1,HSD_2,HSD_3	20,34,14,22,18,16,17,50,29	46,181,63,77,86,101,72,163,77	Fam120a	PIN-like domain superfamily||Constitutive coactivator of PPAR-gamma	20	34	14	22	18	16	17	50	29	392.989	575.969	266.855	309.706	303.321	303.019	317.099	721.792	576.231	29.1001	22.4016	0.38075	0.38566	0.98499	FALSE	17.168	23.0432	-0.43012	0.34318	0.98087	FALSE	17.7119	30.9405	-0.81476	0.057386	0.99144	FALSE
novel_circ_0016689	X	157550931	157561501	-	10570	118	ENSMUSG00000046873;	exon:157561383-157561501	HFD_1,HFD_2	2,3	9,6	Mbtps2	C2H2-type Zinc finger protein, YY-1-like||Zinc finger C2H2 superfamily||PDZ superfamily||Membrane-bound transcription factor site-2 protease||Zinc finger C2H2-type||Peptidase M50	0	0	0	2	3	0	0	0	0	0	0	0	28.1551	50.5536	0	0	0	0	0	0	NA	NA	NA	NA	1.48565	0	2.9688	0.41822	0.98087	FALSE	1.5363	0	3.0565	0.41949	0.99144	FALSE
novel_circ_0016686	X	152253423	152262357	+	8934	194	ENSMUSG00000025332;	exon:152262163-152262357	HFD_2	3	88	Kdm5c	Zinc finger, PHD-finger||Zinc finger, PHD-type||Lysine-specific demethylase-like domain||Zinc finger, FYVE/PHD-type||Zinc finger, RING/FYVE/PHD-type||Zinc finger, C5HC2-type||JmjN domain||ARID DNA-binding domain superfamily||Zinc finger, PHD-type, conserved site||JmjC domain||-||ARID DNA-binding domain	0	0	0	0	3	0	0	0	0	0	0	0	0	50.5536	0	0	0	0	0	0	NA	NA	NA	NA	0.951542	0	2.3196	0.5613	0.98087	FALSE	0.978717	0	2.4003	0.54776	0.99144	FALSE
novel_circ_0011655	4	98568938	98592024	+	23086	287	ENSMUSG00000061859;	exon:98568939-98569135,exon:98591933-98592024	CON_2,HSD_3	5,2	60,37	Patj	PDZ superfamily||L27 domain superfamily||L27 domain||L27-2||PDZ domain	0	5	0	0	0	0	0	0	2	0	84.7013	0	0	0	0	0	0	39.7401	0.692946	1.53864	-1.1831	0.72663	0.99127	FALSE	0	1.58316	-3.2212	0.41645	0.98087	FALSE	0	0.736264	-2.0487	0.61104	0.99144	FALSE
novel_circ_0016684	X	152248427	152248820	+	393	277	ENSMUSG00000025332;	exon:152248428-152248547,exon:152248662-152248820	CON_2,CON_3,HFD_1,HFD_2	3,2,2,3	91,106,66,71	Kdm5c	Zinc finger, PHD-finger||Zinc finger, PHD-type||Lysine-specific demethylase-like domain||Zinc finger, FYVE/PHD-type||Zinc finger, RING/FYVE/PHD-type||Zinc finger, C5HC2-type||JmjN domain||ARID DNA-binding domain superfamily||Zinc finger, PHD-type, conserved site||JmjC domain||-||ARID DNA-binding domain	0	3	2	2	3	0	0	0	0	0	50.8208	38.1221	28.1551	50.5536	0	0	0	0	0	1.60653	-3.215	0.38144	0.98499	FALSE	1.48565	1.65554	-0.15645	0.94743	0.99903	FALSE	1.5363	0	3.0565	0.41949	0.99144	FALSE
novel_circ_0016685	X	152253423	152253861	+	438	343	ENSMUSG00000025332;	exon:152253424-152253605,exon:152253699-152253861	CON_1,CON_2,CON_3,HFD_1,HFD_2,HFD_3,HSD_1,HSD_2,HSD_3	42,49,31,54,53,46,32,67,47	55,106,81,67,93,77,42,132,108	Kdm5c	Zinc finger, PHD-finger||Zinc finger, PHD-type||Lysine-specific demethylase-like domain||Zinc finger, FYVE/PHD-type||Zinc finger, RING/FYVE/PHD-type||Zinc finger, C5HC2-type||JmjN domain||ARID DNA-binding domain superfamily||Zinc finger, PHD-type, conserved site||JmjC domain||-||ARID DNA-binding domain	42	49	31	54	53	46	32	67	47	825.277	830.072	590.893	760.189	893.113	871.179	596.892	967.202	933.892	44.9155	40.697	0.14676	0.65595	0.98499	FALSE	47.2843	41.8626	0.17203	0.5742	0.98087	FALSE	48.7506	47.8134	0.019466	0.94891	0.99761	FALSE
novel_circ_0003862	14	56758606	56764244	-	5638	107	ENSMUSG00000021938;	intron:56758607-56758714	HFD_3	2	23	Pspc1	NOPS||PSP1, RNA recognition motif 2||-||PSP1, RNA recognition motif 1||Nucleotide-binding alpha-beta plait domain superfamily||RNA-binding domain superfamily||RNA recognition motif domain	0	0	0	0	0	2	0	0	0	0	0	0	0	0	37.8774	0	0	0	0	0	NA	NA	NA	NA	0.697949	0	1.854	0.64509	0.98087	FALSE	0.713271	0	1.9267	0.63226	0.99144	FALSE
novel_circ_0008965	2	156174096	156176457	-	2361	54	ENSMUSG00000027620;	exon:156176403-156176457	HSD_3	5	26	Rbm39	-||Splicing factor RBM39, linker||RNA recognition motif domain||Splicing factor, RBM39-like||Nucleotide-binding alpha-beta plait domain superfamily||RNA-binding domain superfamily||RNA recognition motif domain, eukaryote	0	0	0	0	0	0	0	0	5	0	0	0	0	0	0	0	0	99.3502	1.73237	0	3.2207	0.41549	0.98499	FALSE	0	0	NA	NA	NA	NA	0	1.84066	-3.3798	0.39286	0.99144	FALSE
novel_circ_0008966	2	156174706	156176457	-	1751	321	ENSMUSG00000027620;	exon:156174707-156174974,exon:156176403-156176457	HSD_2	3	43	Rbm39	-||Splicing factor RBM39, linker||RNA recognition motif domain||Splicing factor, RBM39-like||Nucleotide-binding alpha-beta plait domain superfamily||RNA-binding domain superfamily||RNA recognition motif domain, eukaryote	0	0	0	0	0	0	0	3	0	0	0	0	0	0	0	0	43.3075	0	0.800071	0	2.1371	0.59397	0.98499	FALSE	0	0	NA	NA	NA	NA	0	0.844554	-2.2881	0.56827	0.99144	FALSE
novel_circ_0008967	2	156177632	156177906	-	274	273	ENSMUSG00000027620;	exon:156177633-156177906	HFD_3	2	111	Rbm39	-||Splicing factor RBM39, linker||RNA recognition motif domain||Splicing factor, RBM39-like||Nucleotide-binding alpha-beta plait domain superfamily||RNA-binding domain superfamily||RNA recognition motif domain, eukaryote	0	0	0	0	0	2	0	0	0	0	0	0	0	0	37.8774	0	0	0	0	0	NA	NA	NA	NA	0.697949	0	1.854	0.64509	0.98087	FALSE	0.713271	0	1.9267	0.63226	0.99144	FALSE
novel_circ_0015096	8	45792780	45805853	+	13073	200	ENSMUSG00000031626;	exon:45805653-45805853	CON_2,HFD_1,HFD_3	3,4,2	33,44,30	Sorbs2	Zinc finger C2H2-type||SoHo domain||SH3-like domain superfamily||SH3 domain||Sorbin and SH3 domain-containing protein||-	0	3	0	4	0	2	0	0	0	0	50.8208	0	56.3103	0	37.8774	0	0	0	0	0.923183	-2.4234	0.54478	0.98499	FALSE	1.76617	0.949895	0.87849	0.75511	0.99354	FALSE	1.82844	0	3.3075	0.36166	0.99144	FALSE
novel_circ_0015097	8	45967855	45970573	-	2718	75	ENSMUSG00000071103;	exon:45967856-45967931	CON_2,HFD_2,HSD_3	2,2,2	1,5,0	1700029J07Rik	Protein of unknown function DUF4586	0	2	0	0	2	0	0	0	2	0	33.8805	0	0	33.7024	0	0	0	39.7401	0.692946	0.615455	0.13588	0.97221	0.9996	FALSE	0.634361	0.633264	-0.019993	0.99584	0.99903	FALSE	0.652478	0.736264	-0.16152	0.96726	0.99761	FALSE
novel_circ_0015094	8	45789975	45805853	+	15878	249	ENSMUSG00000031626;	exon:45789976-45790025,exon:45805653-45805853	CON_1,CON_2,CON_3,HFD_1,HFD_2,HFD_3,HSD_1,HSD_2,HSD_3	5,4,14,15,3,9,7,11,7	25,27,13,37,13,26,4,26,15	Sorbs2	Zinc finger C2H2-type||SoHo domain||SH3-like domain superfamily||SH3 domain||Sorbin and SH3 domain-containing protein||-	5	4	14	15	3	9	7	11	7	98.2473	67.761	266.855	211.164	50.5536	170.448	130.57	158.794	139.09	7.71332	7.80318	-0.005965	0.99373	0.9996	FALSE	8.09813	8.04058	0.024725	0.97462	0.99903	FALSE	8.37031	8.22195	0.029784	0.96738	0.99761	FALSE
novel_circ_0015093	8	45759052	45775703	+	16651	252	ENSMUSG00000031626;	exon:45759053-45759191,exon:45775589-45775703	CON_2,CON_3,HFD_1,HFD_3,HSD_2,HSD_3	7,3,16,14,3,3	34,25,59,47,34,25	Sorbs2	Zinc finger C2H2-type||SoHo domain||SH3-like domain superfamily||SH3 domain||Sorbin and SH3 domain-containing protein||-	0	7	3	16	0	14	0	3	3	0	118.582	57.1832	225.241	0	265.141	0	43.3075	59.6101	1.83949	3.17911	-0.79515	0.65079	0.98499	FALSE	9.15851	3.27489	1.4757	0.44538	0.98087	FALSE	9.45356	1.94895	2.272	0.21583	0.99144	FALSE
novel_circ_0015090	8	44988930	44989245	+	315	314	ENSMUSG00000070047;	exon:44988931-44989245	CON_1,CON_3,HFD_2,HFD_3	3,4,6,2	60,75,109,90	Fat1	Laminin G domain||-||Cadherin-like superfamily||EGF-like, conserved site||Concanavalin A-like lectin/glucanase domain superfamily||Cadherin conserved site||EGF-type aspartate/asparagine hydroxylation site||EGF-like domain||EGF-like calcium-binding domain||EGF-like calcium-binding, conserved site||Growth factor receptor cysteine-rich domain superfamily||Cadherin-like	3	0	4	0	6	2	0	0	0	58.9484	0	76.2442	0	101.107	37.8774	0	0	0	0	2.44001	-3.8103	0.23394	0.98499	FALSE	2.60103	2.51201	0.049256	0.97739	0.99903	FALSE	2.67071	0	3.8473	0.21774	0.99144	FALSE
novel_circ_0015091	8	45645760	45658941	+	13181	294	ENSMUSG00000031626;	exon:45645761-45645852,exon:45653530-45653595,exon:45658803-45658941	CON_1,CON_3,HFD_1,HFD_2,HFD_3	3,2,3,4,3	16,22,16,10,31	Sorbs2	Zinc finger C2H2-type||SoHo domain||SH3-like domain superfamily||SH3 domain||Sorbin and SH3 domain-containing protein||-	3	0	2	3	4	3	0	0	0	58.9484	0	38.1221	42.2327	67.4047	56.816	0	0	0	0	1.75667	-3.3353	0.35371	0.98499	FALSE	3.11681	1.80637	0.80346	0.61621	0.98087	FALSE	3.21124	0	4.1157	0.1054	0.99144	FALSE
novel_circ_0015320	8	83036024	83042782	+	6758	96	ENSMUSG00000047747;	exon:83036025-83036121	CON_3,HFD_1,HFD_2	4,4,6	14,7,11	Rnf150	PA domain||Zinc finger, RING/FYVE/PHD-type||Zinc finger, RING-type	0	0	4	4	6	0	0	0	0	0	0	76.2442	56.3103	101.107	0	0	0	0	0	1.36668	-2.9759	0.4537	0.98499	FALSE	2.9713	1.41129	1.0872	0.5987	0.98087	FALSE	3.0726	0	4.0564	0.15923	0.99144	FALSE
novel_circ_0015321	8	83233479	83236719	+	3240	435	ENSMUSG00000031709;	exon:83233480-83233708,exon:83236512-83236719	HSD_2	3	27	Tbc1d9	TCB1D9/TCB1D9B, PH-GRAM domain 2||EF-hand domain pair||EF-hand domain||GRAM domain||Rab-GTPase-TBC domain||TCB1D9/TCB1D9B, PH-GRAM domain 1||Rab-GTPase-TBC domain superfamily||PH-like domain superfamily	0	0	0	0	0	0	0	3	0	0	0	0	0	0	0	0	43.3075	0	0.800071	0	2.1371	0.59397	0.98499	FALSE	0	0	NA	NA	NA	NA	0	0.844554	-2.2881	0.56827	0.99144	FALSE
novel_circ_0015322	8	83727744	83728211	-	467	339	ENSMUSG00000002885;	exon:83727745-83727968,exon:83728095-83728211	HSD_3	2	137	Adgre5	EGF-like calcium-binding domain||EGF-like domain||GPCR, family 2, CD97 antigen||EGF-like calcium-binding, conserved site||GPCR, family 2-like||-||GPCR, family 2, secretin-like||GPS motif||EGF-type aspartate/asparagine hydroxylation site	0	0	0	0	0	0	0	0	2	0	0	0	0	0	0	0	0	39.7401	0.692946	0	1.8892	0.63904	0.98499	FALSE	0	0	NA	NA	NA	NA	0	0.736264	-2.0487	0.61104	0.99144	FALSE
novel_circ_0015324	8	83733413	83734352	-	939	56	ENSMUSG00000002885;	exon:83734296-83734352	HFD_2,HFD_3,HSD_1	2,10,2	153,97,84	Adgre5	EGF-like calcium-binding domain||EGF-like domain||GPCR, family 2, CD97 antigen||EGF-like calcium-binding, conserved site||GPCR, family 2-like||-||GPCR, family 2, secretin-like||GPS motif||EGF-type aspartate/asparagine hydroxylation site	0	0	0	0	2	10	2	0	0	0	0	0	0	33.7024	189.387	37.3058	0	0	0.672692	0	1.8517	0.64596	0.98499	FALSE	4.12411	0	4.4344	0.24926	0.98087	FALSE	4.21883	0.728095	2.557	0.32683	0.99144	FALSE
novel_circ_0015325	8	83915406	83923108	+	7702	270	ENSMUSG00000013033;	exon:83915407-83915568,exon:83922999-83923108	HSD_1	4	35	Adgrl1	Latrophilin-1||GPCR, family 2, secretin-like, conserved site||GPCR, family 2, latrophilin||Olfactomedin-like domain||D-galactoside/L-rhamnose binding SUEL lectin domain||GPCR family 2, extracellular hormone receptor domain superfamily||GPCR, family 2, extracellular hormone receptor domain||GPCR, family 2, latrophilin, C-terminal||GPCR, family 2-like||-||GPCR, family 2, secretin-like||GPS motif||G…	0	0	0	0	0	0	4	0	0	0	0	0	0	0	0	74.6116	0	0	1.34538	0	2.8571	0.47162	0.98499	FALSE	0	0	NA	NA	NA	NA	0	1.45619	-3.0412	0.44345	0.99144	FALSE
novel_circ_0015326	8	83990427	83990985	+	558	343	ENSMUSG00000005469;	exon:83990428-83990554,exon:83990642-83990737,exon:83990863-83990985	CON_1,CON_3,HFD_1,HFD_2,HSD_1,HSD_2,HSD_3	9,7,5,10,5,2,2	30,35,45,48,25,51,35	Prkaca	Protein kinase domain||Serine/threonine-protein kinase, active site||Protein kinase, ATP binding site||AGC-kinase, C-terminal||Protein kinase-like domain superfamily||cAMP-dependent protein kinase catalytic subunit alpha	9	0	7	5	10	0	5	2	2	176.845	0	133.427	70.3878	168.512	0	93.2644	28.8717	39.7401	2.90806	5.61167	-0.94934	0.43682	0.98499	FALSE	4.50708	5.77193	-0.3493	0.8549	0.99903	FALSE	4.65635	3.11954	0.59905	0.63826	0.99144	FALSE
novel_circ_0015327	8	84217244	84224280	-	7036	163	ENSMUSG00000035671;	exon:84217245-84217408	CON_2	3	33	Zswim4	Zinc finger, SWIM-type	0	3	0	0	0	0	0	0	0	0	50.8208	0	0	0	0	0	0	0	0	0.923183	-2.4234	0.54478	0.98499	FALSE	0	0.949895	-2.4887	0.534	0.98087	FALSE	0	0	NA	NA	NA	NA
novel_circ_0015328	8	84583558	84588859	+	5301	110	ENSMUSG00000034656;	exon:84588749-84588859	HFD_1,HFD_2	4,2	3,2	Cacna1a	Voltage-dependent L-type calcium channel, IQ-associated domain||Voltage-dependent channel domain superfamily||Voltage-dependent calcium channel, P/Q-type, alpha-1 A||Voltage-dependent calcium channel, alpha-1 subunit, IQ domain||Voltage-dependent calcium channel, alpha-1 subunit||Ion transport domain	0	0	0	4	2	0	0	0	0	0	0	0	56.3103	33.7024	0	0	0	0	0	0	NA	NA	NA	NA	1.70258	0	3.1692	0.3741	0.98087	FALSE	1.76764	0	3.2622	0.3725	0.99144	FALSE
novel_circ_0015329	8	84611597	84612412	+	815	150	ENSMUSG00000034656;	exon:84611598-84611748	CON_2,CON_3,HFD_1,HFD_2,HFD_3,HSD_2	2,3,3,2,3,2	12,4,6,2,3,4	Cacna1a	Voltage-dependent L-type calcium channel, IQ-associated domain||Voltage-dependent channel domain superfamily||Voltage-dependent calcium channel, P/Q-type, alpha-1 A||Voltage-dependent calcium channel, alpha-1 subunit, IQ domain||Voltage-dependent calcium channel, alpha-1 subunit||Ion transport domain	0	2	3	3	2	3	0	2	0	0	33.8805	57.1832	42.2327	33.7024	56.816	0	28.8717	0	0.53338	1.64047	-1.5717	0.61289	0.98499	FALSE	2.48245	1.69173	0.54415	0.7599	0.99354	FALSE	2.55876	0.563036	2.1	0.38884	0.99144	FALSE
mmu_circ_0000448	13	28668369	28669994	-	1625	548	ENSMUSG00000085936;	exon:28669782-28669994	CON_1,CON_2,CON_3,HFD_2,HFD_3,HSD_1,HSD_2,HSD_3	19,14,16,9,3,15,9,4	1,2,3,4,1,4,0,0	--	-	19	14	16	0	9	3	15	9	4	373.34	237.164	304.977	0	151.661	56.816	279.793	129.923	79.4802	8.83129	16.5726	-0.90876	0.12938	0.98499	FALSE	3.90155	17.0493	-2.147	0.03452	0.98087	TRUE	4.00606	9.4669	-1.2519	0.31154	0.99144	FALSE
novel_circ_0011430	4	58869414	58885498	-	16084	269	ENSMUSG00000050812;	exon:58869415-58869554,exon:58885368-58885498	HFD_3,HSD_1	4,2	35,39	Ecpas	Armadillo-type fold||Proteasome component Ecm29||Armadillo-like helical	0	0	0	0	0	4	2	0	0	0	0	0	0	0	75.7547	37.3058	0	0	0.672692	0	1.8517	0.64596	0.98499	FALSE	1.3959	0	2.864	0.47022	0.98087	FALSE	1.42654	0.728095	0.97473	0.7804	0.99761	FALSE
novel_circ_0011432	4	58872588	58885498	-	12910	301	ENSMUSG00000050812;	exon:58872589-58872760,exon:58885368-58885498	CON_3	3	33	Ecpas	Armadillo-type fold||Proteasome component Ecm29||Armadillo-like helical	0	0	3	0	0	0	0	0	0	0	0	57.1832	0	0	0	0	0	0	0	1.02501	-2.5603	0.52141	0.98499	FALSE	0	1.05847	-2.6303	0.51006	0.98087	FALSE	0	0	NA	NA	NA	NA
novel_circ_0011433	4	58875423	58885498	-	10075	130	ENSMUSG00000050812;	exon:58885368-58885498	HFD_1	3	53	Ecpas	Armadillo-type fold||Proteasome component Ecm29||Armadillo-like helical	0	0	0	3	0	0	0	0	0	0	0	0	42.2327	0	0	0	0	0	0	0	NA	NA	NA	NA	0.801163	0	2.0951	0.6011	0.98087	FALSE	0.836375	0	2.1951	0.58373	0.99144	FALSE
novel_circ_0007518	1	155187777	155197435	+	9658	387	ENSMUSG00000026470;	exon:155187778-155187840,exon:155191429-155191554,exon:155193219-155193325,exon:155197341-155197435	CON_2,HFD_1,HFD_3,HSD_1,HSD_2,HSD_3	11,3,3,9,4,4	1.12135e+17	Stx6	Target SNARE coiled-coil homology domain||SNARE||Syntaxin/epimorphin, conserved site||Syntaxin 6, N-terminal||-	0	11	0	3	0	3	9	4	4	0	186.343	0	42.2327	0	56.816	167.876	57.7434	79.4802	5.47977	3.38501	0.67832	0.71657	0.98984	FALSE	1.84809	3.48295	-0.92164	0.74155	0.99133	FALSE	1.90628	5.87503	-1.6172	0.1931	0.99144	FALSE
novel_circ_0011435	4	59207760	59220389	+	12629	243	ENSMUSG00000028381;	exon:59207761-59207902,exon:59211876-59211978	CON_1	2	59	Ugcg	Ceramide glucosyltransferase||Nucleotide-diphospho-sugar transferases	2	0	0	0	0	0	0	0	0	39.2989	0	0	0	0	0	0	0	0	0	0.71555	-2.0323	0.61412	0.98499	FALSE	0	0.733817	-2.0934	0.60355	0.98087	FALSE	0	0	NA	NA	NA	NA
novel_circ_0011436	4	59207760	59220494	+	12734	243	ENSMUSG00000028381;	exon:59207761-59207902,exon:59211876-59211978	HFD_1,HFD_3	2,6	80,64	Ugcg	Ceramide glucosyltransferase||Nucleotide-diphospho-sugar transferases	0	0	0	2	0	6	0	0	0	0	0	0	28.1551	0	113.632	0	0	0	0	0	NA	NA	NA	NA	2.62796	0	3.7822	0.2261	0.98087	FALSE	2.6974	0	3.8601	0.21414	0.99144	FALSE
novel_circ_0011437	4	59349825	59351729	-	1904	277	ENSMUSG00000038578;	exon:59349826-59350012,exon:59351638-59351729	CON_2,CON_3,HFD_2,HSD_3	6,2,2,2	37,26,40,20	Susd1	EGF-type aspartate/asparagine hydroxylation site||EGF-like, conserved site||Growth factor receptor cysteine-rich domain superfamily||Sushi/SCR/CCP domain||EGF-like calcium-binding, conserved site||Sushi/SCR/CCP superfamily||EGF-like calcium-binding domain||EGF-like domain	0	6	2	0	2	0	0	0	2	0	101.642	38.1221	0	33.7024	0	0	0	39.7401	0.692946	2.52971	-1.9121	0.46158	0.98499	FALSE	0.634361	2.60544	-2.0544	0.42946	0.98087	FALSE	0.652478	0.736264	-0.16152	0.96726	0.99761	FALSE
novel_circ_0007514	1	153512545	153518975	-	6430	176	ENSMUSG00000042684;	exon:153512546-153512630,exon:153518883-153518975	CON_2,HFD_3,HSD_3	5,3,3	324,116,98	Npl	Aldolase-type TIM barrel||DapA-like	0	5	0	0	0	3	0	0	3	0	84.7013	0	0	0	56.816	0	0	59.6101	1.03942	1.53864	-0.59405	0.85165	0.9996	FALSE	1.04692	1.58316	-0.6296	0.84188	0.99903	FALSE	1.06991	1.1044	-0.04893	0.98875	0.99761	FALSE
novel_circ_0011439	4	59349825	59380958	-	31133	283	ENSMUSG00000038578;	exon:59349826-59350012,exon:59380861-59380958	CON_1,CON_2,HFD_2,HFD_3,HSD_2,HSD_3	2,3,11,2,5,2	23,59,55,32,28,28	Susd1	EGF-type aspartate/asparagine hydroxylation site||EGF-like, conserved site||Growth factor receptor cysteine-rich domain superfamily||Sushi/SCR/CCP domain||EGF-like calcium-binding, conserved site||Sushi/SCR/CCP superfamily||EGF-like calcium-binding domain||EGF-like domain	2	3	0	0	11	2	0	5	2	39.2989	50.8208	0	0	185.363	37.8774	0	72.1792	39.7401	2.0264	1.63873	0.31637	0.88233	0.9996	FALSE	4.18694	1.68371	1.299	0.43209	0.98087	FALSE	4.3019	2.14385	0.97014	0.53832	0.99144	FALSE
novel_circ_0007510	1	153468873	153483872	-	14999	214	ENSMUSG00000042699;	exon:153468874-153468956,exon:153483740-153483872	HSD_3	3	59	Dhx9	Double-stranded RNA-binding domain||Helicase, C-terminal||Domain of unknown function DUF1605||DEAD/DEAH box helicase domain||-||Helicase-associated domain||DNA/RNA helicase, ATP-dependent, DEAH-box type, conserved site||Helicase superfamily 1/2, ATP-binding domain||P-loop containing nucleoside triphosphate hydrolase	0	0	0	0	0	0	0	0	3	0	0	0	0	0	0	0	0	59.6101	1.03942	0	2.4794	0.53409	0.98499	FALSE	0	0	NA	NA	NA	NA	0	1.1044	-2.6386	0.50819	0.99144	FALSE
novel_circ_0007511	1	153469599	153478189	-	8590	468	ENSMUSG00000042699;	exon:153473147-153473283,exon:153475663-153475709,exon:153476424-153476562,exon:153478041-153478189	CON_1,CON_2,CON_3,HFD_2,HFD_3,HSD_1,HSD_3	2,6,3,2,4,5,2	47,94,43,65,38,27,41	Dhx9	Double-stranded RNA-binding domain||Helicase, C-terminal||Domain of unknown function DUF1605||DEAD/DEAH box helicase domain||-||Helicase-associated domain||DNA/RNA helicase, ATP-dependent, DEAH-box type, conserved site||Helicase superfamily 1/2, ATP-binding domain||P-loop containing nucleoside triphosphate hydrolase	2	6	3	0	2	4	5	0	2	39.2989	101.642	57.1832	0	33.7024	75.7547	93.2644	0	39.7401	2.37468	3.58693	-0.62875	0.66875	0.98499	FALSE	2.03026	3.69207	-0.90648	0.5408	0.98087	FALSE	2.07902	2.5565	-0.3012	0.87206	0.99761	FALSE
novel_circ_0007512	1	153471619	153483872	-	12253	400	ENSMUSG00000042699;	exon:153471620-153471811,exon:153472226-153472303,exon:153483740-153483872	HSD_1	3	32	Dhx9	Double-stranded RNA-binding domain||Helicase, C-terminal||Domain of unknown function DUF1605||DEAD/DEAH box helicase domain||-||Helicase-associated domain||DNA/RNA helicase, ATP-dependent, DEAH-box type, conserved site||Helicase superfamily 1/2, ATP-binding domain||P-loop containing nucleoside triphosphate hydrolase	0	0	0	0	0	0	3	0	0	0	0	0	0	0	0	55.9587	0	0	1.00904	0	2.4402	0.54079	0.98499	FALSE	0	0	NA	NA	NA	NA	0	1.09214	-2.6239	0.51065	0.99144	FALSE
novel_circ_0016668	X	151373831	151381993	+	8162	82	ENSMUSG00000025262;	intron:151381911-151381993	CON_2	3	10	Fam120c	Constitutive coactivator of PPAR-gamma||PIN-like domain superfamily||Constitutive coactivator of PPAR-gamma-like protein 2	0	3	0	0	0	0	0	0	0	0	50.8208	0	0	0	0	0	0	0	0	0.923183	-2.4234	0.54478	0.98499	FALSE	0	0.949895	-2.4887	0.534	0.98087	FALSE	0	0	NA	NA	NA	NA
novel_circ_0013499	6	57598428	57626050	+	27622	227	ENSMUSG00000029798;	exon:57598429-57598656	HFD_2,HSD_3	2,5	6,2	Herc6	Regulator of chromosome condensation, RCC1||HECT domain||HECT, E3 ligase catalytic domain||-||Regulator of chromosome condensation 1/beta-lactamase-inhibitor protein II	0	0	0	0	2	0	0	0	5	0	0	0	0	33.7024	0	0	0	99.3502	1.73237	0	3.2207	0.41549	0.98499	FALSE	0.634361	0	1.7334	0.66753	0.98087	FALSE	0.652478	1.84066	-1.4914	0.65019	0.99144	FALSE
mmu_circ_0000610	15	73012805	73031643	-	18838	465	ENSMUSG00000047921;	exon:73012806-73013022,exon:73025962-73026087,exon:73031522-73031643	CON_1,CON_3,HFD_1,HFD_3,HSD_1,HSD_2,HSD_3	3,7,4,11,8,10,6	15,22,23,21,22,43,38	Trappc9	TRAPP II complex, Trs120	3	0	7	4	0	11	8	10	6	58.9484	0	133.427	56.3103	0	208.325	149.223	144.358	119.22	7.43651	3.46502	1.1217	0.26098	0.98499	FALSE	4.90694	3.57048	0.45726	0.81514	0.99903	FALSE	5.03816	7.93635	-0.68202	0.46559	0.99144	FALSE
novel_circ_0006729	19	24122024	24122371	-	347	241	ENSMUSG00000024812;	exon:24122025-24122158,exon:24122263-24122371	HSD_2	4	62	Tjp2	PDZ superfamily||PDZ domain||Tight junction protein ZO||SH3-like domain superfamily||Guanylate kinase-like domain||ZO-2, SH3 domain||Tight junction protein ZO-2||P-loop containing nucleoside triphosphate hydrolase||Guanylate kinase/L-type calcium channel beta subunit||SH3 domain	0	0	0	0	0	0	0	4	0	0	0	0	0	0	0	0	57.7434	0	1.06676	0	2.5468	0.52266	0.98499	FALSE	0	0	NA	NA	NA	NA	0	1.12607	-2.6973	0.49846	0.99144	FALSE
novel_circ_0013492	6	56789218	56789700	-	482	481	ENSMUSG00000059486;	exon:56789219-56789700	CON_1,HFD_1,HFD_3,HSD_2	3,3,2,3	23,31,23,40	Kbtbd2	Kelch-type beta propeller||BTB/Kelch-associated||Kelch repeat type 1||BTB/POZ domain||-||SKP1/BTB/POZ domain superfamily||BTB-kelch protein	3	0	0	3	0	2	0	3	0	58.9484	0	0	42.2327	0	37.8774	0	43.3075	0	0.800071	1.07332	-0.38567	0.91409	0.9996	FALSE	1.49911	1.10073	0.46264	0.87218	0.99903	FALSE	1.54965	0.844554	0.83699	0.78059	0.99761	FALSE
novel_circ_0013493	6	56849637	56851507	+	1870	145	ENSMUSG00000029781;	exon:56851362-56851507	CON_3,HFD_2	2,3	348456	Fkbp9	FKBP-type peptidyl-prolyl cis-trans isomerase domain||EF-hand domain pair||EF-Hand 1, calcium-binding site||EF-hand domain	0	0	2	0	3	0	0	0	0	0	0	38.1221	0	50.5536	0	0	0	0	0	0.683342	-1.9743	0.6247	0.98499	FALSE	0.951542	0.705644	0.43287	0.90583	0.99903	FALSE	0.978717	0	2.4003	0.54776	0.99144	FALSE
novel_circ_0013494	6	56849637	56860801	+	11164	290	ENSMUSG00000029781;	exon:56849638-56849783,exon:56860656-56860801	CON_1,CON_2,CON_3,HFD_1,HFD_2,HFD_3,HSD_1,HSD_2,HSD_3	8,4,5,2,5,8,4,10,3	1.98417e+26	Fkbp9	FKBP-type peptidyl-prolyl cis-trans isomerase domain||EF-hand domain pair||EF-Hand 1, calcium-binding site||EF-hand domain	8	4	5	2	5	8	4	10	3	157.196	67.761	95.3053	28.1551	84.2559	151.509	74.6116	144.358	59.6101	5.0517	5.80146	-0.17004	0.85188	0.9996	FALSE	4.91181	5.96591	-0.29976	0.74577	0.99213	FALSE	5.04186	5.37576	-0.13492	0.88915	0.99761	FALSE
novel_circ_0013497	6	56875668	56878284	+	2616	163	ENSMUSG00000029781;	exon:56875669-56875832	CON_3,HFD_1,HSD_2	2,2,3	296287466	Fkbp9	FKBP-type peptidyl-prolyl cis-trans isomerase domain||EF-hand domain pair||EF-Hand 1, calcium-binding site||EF-hand domain	0	0	2	2	0	0	0	3	0	0	0	38.1221	28.1551	0	0	0	43.3075	0	0.800071	0.683342	0.25699	0.94611	0.9996	FALSE	0.534108	0.705644	-0.36514	0.9244	0.99903	FALSE	0.557583	0.844554	-0.5972	0.87872	0.99761	FALSE
novel_circ_0008344	1	87364103	87403846	+	39743	308	ENSMUSG00000048000;	exon:87364104-87364233,exon:87403667-87403846	CON_1,CON_2,CON_3,HFD_1,HFD_2,HSD_1,HSD_2,HSD_3	9,10,7,10,6,3,6,4	35,104,55,48,67,37,70,65	Gigyf2	-||GYF-like domain superfamily||GYF domain	9	10	7	10	6	0	3	6	4	176.845	169.403	133.427	140.776	101.107	0	55.9587	86.6151	79.4802	3.99507	8.68895	-1.1118	0.17577	0.98499	FALSE	4.57363	8.93825	-0.93	0.27813	0.98087	FALSE	4.74535	4.25378	0.17436	0.87593	0.99761	FALSE
novel_circ_0008345	1	87403666	87411867	+	8201	179	ENSMUSG00000048000;	exon:87403667-87403846	HSD_2	2	42	Gigyf2	-||GYF-like domain superfamily||GYF domain	0	0	0	0	0	0	0	2	0	0	0	0	0	0	0	0	28.8717	0	0.53338	0	1.5621	0.70028	0.98499	FALSE	0	0	NA	NA	NA	NA	0	0.563036	-1.7139	0.67182	0.99144	FALSE
novel_circ_0008346	1	87423180	87425226	+	2046	261	ENSMUSG00000048000;	exon:87423181-87423281,exon:87425065-87425226	HFD_3,HSD_3	3,4	10,19	Gigyf2	-||GYF-like domain superfamily||GYF domain	0	0	0	0	0	3	0	0	4	0	0	0	0	0	56.816	0	0	79.4802	1.38589	0	2.8971	0.46525	0.98499	FALSE	1.04692	0	2.4455	0.53951	0.98087	FALSE	1.06991	1.47253	-0.46802	0.88509	0.99761	FALSE
novel_circ_0008347	1	87428569	87433916	+	5347	390	ENSMUSG00000048000;	exon:87428570-87428728,exon:87433684-87433916	HFD_2,HSD_1	2,2	26,9	Gigyf2	-||GYF-like domain superfamily||GYF domain	0	0	0	0	2	0	2	0	0	0	0	0	0	33.7024	0	37.3058	0	0	0.672692	0	1.8517	0.64596	0.98499	FALSE	0.634361	0	1.7334	0.66753	0.98087	FALSE	0.652478	0.728095	-0.14747	0.97013	0.99761	FALSE
novel_circ_0008340	1	87364103	87374111	+	10008	338	ENSMUSG00000048000;	exon:87364104-87364233,exon:87365184-87365279,exon:87373997-87374111	CON_1,CON_2,CON_3,HFD_1,HFD_2,HFD_3,HSD_1,HSD_2,HSD_3	16,44,18,22,20,18,24,14,13	2.57435e+26	Gigyf2	-||GYF-like domain superfamily||GYF domain	16	44	18	22	20	18	24	14	13	314.391	745.371	343.099	309.706	337.024	340.896	447.669	202.102	258.311	16.3101	25.4145	-0.65877	0.18062	0.98499	FALSE	18.5003	26.1531	-0.51123	0.25713	0.98087	FALSE	19.0776	17.4641	0.13976	0.77065	0.99761	FALSE
novel_circ_0008341	1	87364103	87379083	+	14980	354	ENSMUSG00000048000;	exon:87364104-87364233,exon:87373997-87374111,exon:87378972-87379083	CON_2,HFD_1,HFD_3,HSD_2,HSD_3	2,2,5,3,4	210168159162138	Gigyf2	-||GYF-like domain superfamily||GYF domain	0	2	0	2	0	5	0	3	4	0	33.8805	0	28.1551	0	94.6934	0	43.3075	79.4802	2.18596	0.615455	1.7973	0.52023	0.98499	FALSE	2.27898	0.633264	1.8089	0.51379	0.98087	FALSE	2.34076	2.31708	0.00019567	0.99992	0.99992	FALSE
novel_circ_0008348	1	87676282	87683866	+	7584	210	ENSMUSG00000026288;	exon:87676283-87676370,exon:87683743-87683866	HSD_2	2	17	Inpp5d	Endonuclease/exonuclease/phosphatase superfamily||Endonuclease/exonuclease/phosphatase||-||SH2 domain||Inositol polyphosphate-related phosphatase||SH2 domain superfamily	0	0	0	0	0	0	0	2	0	0	0	0	0	0	0	0	28.8717	0	0.53338	0	1.5621	0.70028	0.98499	FALSE	0	0	NA	NA	NA	NA	0	0.563036	-1.7139	0.67182	0.99144	FALSE
novel_circ_0008349	1	87760050	87767057	+	7007	93	ENSMUSG00000026289;	exon:87760051-87760144	CON_3,HFD_1,HFD_2,HFD_3,HSD_3	2,3,6,5,3	30,32,50,36,46	Atg16l1	WD40-repeat-containing domain superfamily||Autophagy-related protein 16||WD40-repeat-containing domain||WD40 repeat||G-protein beta WD-40 repeat||WD40/YVTN repeat-like-containing domain superfamily||WD40 repeat, conserved site	0	0	2	3	6	5	0	0	3	0	0	38.1221	42.2327	101.107	94.6934	0	0	59.6101	1.03942	0.683342	0.59559	0.87147	0.9996	FALSE	4.44912	0.705644	2.6677	0.13445	0.98087	FALSE	4.57699	1.1044	2.1012	0.20208	0.99144	FALSE
novel_circ_0005088	16	35453450	35464422	-	10972	307	ENSMUSG00000022844;	exon:35453451-35453543,exon:35456096-35456141,exon:35456462-35456545,exon:35464335-35464422	CON_3,HFD_3	3,2	94,68	Pdia5	Protein disulfide-isomerase A5, N-terminal TRX-like b domain||Thioredoxin domain||Thioredoxin-like superfamily||Thioredoxin, conserved site	0	0	3	0	0	2	0	0	0	0	0	57.1832	0	0	37.8774	0	0	0	0	1.02501	-2.5603	0.52141	0.98499	FALSE	0.697949	1.05847	-0.6225	0.86314	0.99903	FALSE	0.713271	0	1.9267	0.63226	0.99144	FALSE
novel_circ_0013066	6	134758618	134761434	-	2816	138	ENSMUSG00000030203;	exon:134758619-134758757	CON_1,CON_2,CON_3,HFD_1,HFD_2,HFD_3,HSD_1,HSD_2,HSD_3	79,35,48,72,56,72,56,61,36	25,36,25,33,25,31,27,43,13	Dusp16	Dual specificity protein phosphatase domain||Mitogen-activated protein (MAP) kinase phosphatase||Rhodanese-like domain||-||Tyrosine specific protein phosphatases domain||Protein-tyrosine phosphatase, active site||Rhodanese-like domain superfamily||Dual specificity phosphatase, catalytic domain||Protein-tyrosine phosphatase-like	79	35	48	72	56	72	56	61	36	1552.31	592.909	914.931	1013.58	943.666	1363.58	1044.56	880.587	715.322	47.5765	55.4349	-0.21527	0.61978	0.98499	FALSE	62.1162	57.0033	0.12646	0.76341	0.99431	FALSE	64.0201	50.812	0.32895	0.25391	0.99144	FALSE
novel_circ_0010217	3	30237977	30262774	-	24797	75	ENSMUSG00000027684;	intron:30262699-30262774	CON_2,HSD_2	2,4	8,10	Mecom	Zinc finger C2H2-type||Zinc finger C2H2 superfamily||-||SET domain	0	2	0	0	0	0	0	4	0	0	33.8805	0	0	0	0	0	57.7434	0	1.06676	0.615455	0.79551	0.82945	0.9996	FALSE	0	0.633264	-1.9087	0.63725	0.98087	FALSE	0	1.12607	-2.6973	0.49846	0.99144	FALSE
novel_circ_0010740	4	11285053	11304068	-	19015	385	ENSMUSG00000045205;	exon:11285054-11285173,exon:11303312-11303457,exon:11303947-11304068	CON_3	2	21	Dpy19l4	Dpy-19/Dpy-19-like||-||Probable C-mannosyltransferase DPY19L4	0	0	2	0	0	0	0	0	0	0	0	38.1221	0	0	0	0	0	0	0	0.683342	-1.9743	0.6247	0.98499	FALSE	0	0.705644	-2.0441	0.61248	0.98087	FALSE	0	0	NA	NA	NA	NA
novel_circ_0010215	3	29977258	29987177	-	9919	234	ENSMUSG00000027684;	exon:29977259-29977346,exon:29987030-29987177	HSD_1	2	9	Mecom	Zinc finger C2H2-type||Zinc finger C2H2 superfamily||-||SET domain	0	0	0	0	0	0	2	0	0	0	0	0	0	0	0	37.3058	0	0	0.672692	0	1.8517	0.64596	0.98499	FALSE	0	0	NA	NA	NA	NA	0	0.728095	-2.0346	0.6136	0.99144	FALSE
novel_circ_0010214	3	28594021	28596260	+	2239	298	ENSMUSG00000027692;	exon:28594022-28594132,exon:28596072-28596260	HFD_2	3	2	Tnik	Protein kinase domain||-||Protein kinase, ATP binding site||Serine/threonine-protein kinase, active site||Citron homology (CNH) domain||Protein kinase-like domain superfamily	0	0	0	0	3	0	0	0	0	0	0	0	0	50.5536	0	0	0	0	0	0	NA	NA	NA	NA	0.951542	0	2.3196	0.5613	0.98087	FALSE	0.978717	0	2.4003	0.54776	0.99144	FALSE
novel_circ_0010745	4	11338721	11353463	-	14742	427	ENSMUSG00000040728;	exon:11338722-11338831,exon:11344112-11344262,exon:11353295-11353463	CON_1,CON_2,CON_3,HFD_2,HFD_3,HSD_1,HSD_2,HSD_3	2,7,5,6,8,8,4,10	8,13,15,19,4,10,13,4	Esrp1	Nucleotide-binding alpha-beta plait domain superfamily||RNA-binding domain superfamily||ESRP1, RNA recognition motif 1||RNA recognition motif domain||Ribonuclease H-like superfamily||Ribonuclease H superfamily	2	7	5	0	6	8	8	4	10	39.2989	118.582	95.3053	0	101.107	151.509	149.223	57.7434	198.7	7.22226	4.578	0.62935	0.47953	0.98499	FALSE	4.69488	4.71435	-0.04092	0.97052	0.99903	FALSE	4.81052	7.71977	-0.69923	0.46831	0.99144	FALSE
novel_circ_0010744	4	11303311	11317180	-	13869	376	ENSMUSG00000045205;	exon:11303312-11303457,exon:11309366-11309490,exon:11317073-11317180	HSD_2	4	43	Dpy19l4	Dpy-19/Dpy-19-like||-||Probable C-mannosyltransferase DPY19L4	0	0	0	0	0	0	0	4	0	0	0	0	0	0	0	0	57.7434	0	1.06676	0	2.5468	0.52266	0.98499	FALSE	0	0	NA	NA	NA	NA	0	1.12607	-2.6973	0.49846	0.99144	FALSE
novel_circ_0010746	4	11353294	11361255	-	7961	168	ENSMUSG00000040728;	exon:11353295-11353463	HSD_1	9	23	Esrp1	Nucleotide-binding alpha-beta plait domain superfamily||RNA-binding domain superfamily||ESRP1, RNA recognition motif 1||RNA recognition motif domain||Ribonuclease H-like superfamily||Ribonuclease H superfamily	0	0	0	0	0	0	9	0	0	0	0	0	0	0	0	167.876	0	0	3.02711	0	4.0303	0.30568	0.98499	FALSE	0	0	NA	NA	NA	NA	0	3.27643	-4.2151	0.28398	0.99144	FALSE
novel_circ_0010749	4	114580290	114586632	+	6342	320	ENSMUSG00000070867;	exon:114580291-114580437,exon:114586458-114586632	CON_3,HFD_3	3,2	1,9	Trabd2b	Metalloprotease TIKI1/2-like||TraB family	0	0	3	0	0	2	0	0	0	0	0	57.1832	0	0	37.8774	0	0	0	0	1.02501	-2.5603	0.52141	0.98499	FALSE	0.697949	1.05847	-0.6225	0.86314	0.99903	FALSE	0.713271	0	1.9267	0.63226	0.99144	FALSE
novel_circ_0003051	13	45514394	45532400	+	18006	308	ENSMUSG00000000253;	exon:45514395-45514514,exon:45516999-45517082,exon:45532294-45532400	CON_2,HFD_3,HSD_2	2,2,3	73,42,94	Gmpr	Aldolase-type TIM barrel||IMP dehydrogenase/GMP reductase||GMP reductase||IMP dehydrogenase / GMP reductase, conserved site	0	2	0	0	0	2	0	3	0	0	33.8805	0	0	0	37.8774	0	43.3075	0	0.800071	0.615455	0.38603	0.91983	0.9996	FALSE	0.697949	0.633264	0.098811	0.97933	0.99903	FALSE	0.713271	0.844554	-0.29148	0.93948	0.99761	FALSE
novel_circ_0010219	3	30958008	30965935	-	7927	394	ENSMUSG00000037652;	exon:30958009-30958086,exon:30961728-30961883,exon:30965773-30965935	CON_3,HSD_2,HSD_3	2,2,2	4,24,22	Phc3	Zinc finger, FCS-type||-||FCS-type zinc finger superfamily||Sterile alpha motif/pointed domain superfamily||Sterile alpha motif domain	0	0	2	0	0	0	0	2	2	0	0	38.1221	0	0	0	0	28.8717	39.7401	1.22633	0.683342	0.85096	0.79298	0.9996	FALSE	0	0.705644	-2.0441	0.61248	0.98087	FALSE	0	1.2993	-2.8865	0.45862	0.99144	FALSE
novel_circ_0010218	3	30929812	30931892	-	2080	403	ENSMUSG00000037652;	exon:30929813-30930063,exon:30931739-30931892	CON_1,HFD_2,HSD_2	2,3,4	11,18,11	Phc3	Zinc finger, FCS-type||-||FCS-type zinc finger superfamily||Sterile alpha motif/pointed domain superfamily||Sterile alpha motif domain	2	0	0	0	3	0	0	4	0	39.2989	0	0	0	50.5536	0	0	57.7434	0	1.06676	0.71555	0.6114	0.86646	0.9996	FALSE	0.951542	0.733817	0.38477	0.91594	0.99903	FALSE	0.978717	1.12607	-0.22964	0.94766	0.99761	FALSE
novel_circ_0014051	7	128679716	128690698	+	10982	199	ENSMUSG00000042105;	exon:128679717-128679845,exon:128690627-128690698	CON_1,CON_2,CON_3,HFD_1,HFD_2,HFD_3,HSD_1,HSD_2,HSD_3	12,11,6,8,9,8,9,13,10	16,15,26,14,19,22,18,25,23	Inpp5f	Inositol phosphatase||hSac2 domain||SAC domain||-	12	11	6	8	9	8	9	13	10	235.793	186.343	114.366	112.621	151.661	151.509	167.876	187.666	198.7	9.95882	9.72833	0.036949	0.9537	0.9996	FALSE	7.78286	10.0028	-0.3673	0.58218	0.98087	FALSE	8.01957	10.6175	-0.41198	0.52404	0.99144	FALSE
novel_circ_0014050	7	128679716	128685284	+	5568	128	ENSMUSG00000042105;	exon:128679717-128679845	CON_2,CON_3,HSD_2,HSD_3	5,2,4,2	15,22,39,19	Inpp5f	Inositol phosphatase||hSac2 domain||SAC domain||-	0	5	2	0	0	0	0	4	2	0	84.7013	38.1221	0	0	0	0	57.7434	39.7401	1.75971	2.22198	-0.333	0.86912	0.9996	FALSE	0	2.2888	-3.7505	0.25273	0.98087	FALSE	0	1.86233	-3.4095	0.34394	0.99144	FALSE
novel_circ_0014053	7	128703494	128714550	-	11056	284	ENSMUSG00000048170;	exon:128703495-128703628,exon:128714399-128714550	HFD_1	3	33	Mcmbp	Mini-chromosome maintenance complex-binding protein	0	0	0	3	0	0	0	0	0	0	0	0	42.2327	0	0	0	0	0	0	0	NA	NA	NA	NA	0.801163	0	2.0951	0.6011	0.98087	FALSE	0.836375	0	2.1951	0.58373	0.99144	FALSE
novel_circ_0014052	7	128702242	128704644	-	2402	329	ENSMUSG00000048170;	exon:128702243-128702407,exon:128704479-128704644	CON_3,HFD_1,HFD_2,HSD_2	2,4,3,3	25,26,32,41	Mcmbp	Mini-chromosome maintenance complex-binding protein	0	0	2	4	3	0	0	3	0	0	0	38.1221	56.3103	50.5536	0	0	43.3075	0	0.800071	0.683342	0.25699	0.94611	0.9996	FALSE	2.01976	0.705644	1.5329	0.58779	0.98087	FALSE	2.09388	0.844554	1.2686	0.63998	0.99144	FALSE
novel_circ_0014055	7	128709781	128714550	-	4769	429	ENSMUSG00000048170;	exon:128709782-128709960,exon:128712664-128712764,exon:128714399-128714550	CON_1,HFD_1,HSD_1	3,9,3	21,39,23	Mcmbp	Mini-chromosome maintenance complex-binding protein	3	0	0	9	0	0	3	0	0	58.9484	0	0	126.698	0	0	55.9587	0	0	1.00904	1.07332	-0.088813	0.97952	0.9996	FALSE	2.40349	1.10073	1.142	0.76658	0.99628	FALSE	2.50912	1.09214	1.2166	0.75173	0.99761	FALSE
novel_circ_0014057	7	128763940	128766278	+	2338	208	ENSMUSG00000055319;	exon:128763941-128764149	HFD_2	3	16	Sec23ip	-||Sterile alpha motif/pointed domain superfamily||DDHD domain||Sterile alpha motif domain	0	0	0	0	3	0	0	0	0	0	0	0	0	50.5536	0	0	0	0	0	0	NA	NA	NA	NA	0.951542	0	2.3196	0.5613	0.98087	FALSE	0.978717	0	2.4003	0.54776	0.99144	FALSE
novel_circ_0002859	13	119472138	119481030	+	8892	319	ENSMUSG00000062822;	exon:119472139-119472240,exon:119473833-119473956,exon:119480935-119481030	HFD_1,HFD_3,HSD_3	5,2,5	13,5,6	4833420G17Rik	-||Domain of unknown function DUF4524||Domain of unknown function DUF4520	0	0	0	5	0	2	0	0	5	0	0	0	70.3878	0	37.8774	0	0	99.3502	1.73237	0	3.2207	0.41549	0.98499	FALSE	2.03322	0	3.4221	0.31489	0.98087	FALSE	2.10723	1.84066	0.2236	0.92108	0.99761	FALSE
novel_circ_0014059	7	129618625	129620493	+	1868	379	ENSMUSG00000042055;	exon:129618626-129618734,exon:129619894-129620018,exon:129620346-129620493	CON_1,CON_2,HFD_1,HFD_2,HFD_3,HSD_2,HSD_3	3,5,5,5,10,8,5	9,30,14,33,20,23,30	Wdr11	WD40-repeat-containing domain superfamily||WD40 repeat||-||WD repeat-containing protein 11||WD40/YVTN repeat-like-containing domain superfamily||WD40 repeat, conserved site	3	5	0	5	5	10	0	8	5	58.9484	84.7013	0	70.3878	84.2559	189.387	0	115.487	99.3502	3.86589	2.61196	0.5685	0.70513	0.98713	FALSE	6.41092	2.68388	1.2309	0.26301	0.98087	FALSE	6.59151	4.0928	0.65243	0.51955	0.99144	FALSE
novel_circ_0014058	7	128767566	128772362	+	4796	292	ENSMUSG00000055319;	exon:128767567-128767662,exon:128772165-128772362	CON_3,HFD_3,HSD_2,HSD_3	2,3,2,3	10,26,54,52	Sec23ip	-||Sterile alpha motif/pointed domain superfamily||DDHD domain||Sterile alpha motif domain	0	0	2	0	0	3	0	2	3	0	0	38.1221	0	0	56.816	0	28.8717	59.6101	1.5728	0.683342	1.2069	0.69344	0.98499	FALSE	1.04692	0.705644	0.55652	0.87771	0.99903	FALSE	1.06991	1.66743	-0.66487	0.81433	0.99761	FALSE
novel_circ_0002854	13	119394610	119404754	-	10144	217	ENSMUSG00000116207;ENSMUSG00000025453;	exon:119394611-119394828	HSD_1	2	57	Nnt;Nnt	-	0	0	0	0	0	0	2	0	0	0	0	0	0	0	0	37.3058	0	0	0.672692	0	1.8517	0.64596	0.98499	FALSE	0	0	NA	NA	NA	NA	0	0.728095	-2.0346	0.6136	0.99144	FALSE
novel_circ_0002853	13	119389193	119404991	-	15798	87	ENSMUSG00000025453;ENSMUSG00000116207;	intron:119389194-119389281	CON_2	4	67	Nnt;Nnt	-	0	4	0	0	0	0	0	0	0	0	67.761	0	0	0	0	0	0	0	0	1.23091	-2.8357	0.47597	0.98499	FALSE	0	1.26653	-2.901	0.46587	0.98087	FALSE	0	0	NA	NA	NA	NA
novel_circ_0002850	13	119381675	119404754	-	23079	187	ENSMUSG00000116207;ENSMUSG00000025453;	exon:119381676-119381863	CON_3,HSD_2	2,3	52117	Nnt;Nnt	-	0	0	2	0	0	0	0	3	0	0	0	38.1221	0	0	0	0	43.3075	0	0.800071	0.683342	0.25699	0.94611	0.9996	FALSE	0	0.705644	-2.0441	0.61248	0.98087	FALSE	0	0.844554	-2.2881	0.56827	0.99144	FALSE
novel_circ_0002851	13	119386578	119396976	-	10398	182	ENSMUSG00000116207;ENSMUSG00000025453;	exon:119386579-119386667,exon:119388573-119388667	HSD_1	5	65	Nnt;Nnt	-	0	0	0	0	0	0	5	0	0	0	0	0	0	0	0	93.2644	0	0	1.68173	0	3.1802	0.42154	0.98499	FALSE	0	0	NA	NA	NA	NA	0	1.82024	-3.3646	0.39506	0.99144	FALSE
novel_circ_0002935	13	25102332	25119406	+	17074	420	ENSMUSG00000035910;	exon:25102333-25102409,exon:25102521-25102652,exon:25110067-25110121,exon:25119247-25119406	CON_3,HFD_2,HSD_2	6,6,7	3,1,2	Dcdc2a	Doublecortin domain-containing protein 2||Doublecortin domain||Doublecortin domain superfamily	0	0	6	0	6	0	0	7	0	0	0	114.366	0	101.107	0	0	101.051	0	1.86683	2.05003	-0.12294	0.9743	0.9996	FALSE	1.90308	2.11693	-0.15356	0.96789	0.99903	FALSE	1.95743	1.97062	-0.022613	0.99527	0.99761	FALSE
novel_circ_0002934	13	24836015	24840558	+	4543	170	ENSMUSG00000035958;	exon:24836016-24836186	CON_1,HFD_2,HFD_3,HSD_2	2,4,12,4	15,13,23,15	Tdp2	Endonuclease/exonuclease/phosphatase superfamily||Endonuclease/exonuclease/phosphatase||-	2	0	0	0	4	12	0	4	0	39.2989	0	0	0	67.4047	227.264	0	57.7434	0	1.06676	0.71555	0.6114	0.86646	0.9996	FALSE	5.45642	0.733817	2.9127	0.25603	0.98087	FALSE	5.58458	1.12607	2.2664	0.39249	0.99144	FALSE
novel_circ_0005616	17	42815944	42826359	-	10415	78	ENSMUSG00000061665;	exon:42826281-42826359	CON_2,HSD_1	5,3	13,6	Cd2ap	CD2-associated protein, first SH3 domain||SH3-like domain superfamily||CD2-associated protein||SH3 domain||CD2-associated protein, third SH3 domain||CD2-associated protein, second SH3 domain	0	5	0	0	0	0	3	0	0	0	84.7013	0	0	0	0	55.9587	0	0	1.00904	1.53864	-0.63123	0.84324	0.9996	FALSE	0	1.58316	-3.2212	0.41645	0.98087	FALSE	0	1.09214	-2.6239	0.51065	0.99144	FALSE
novel_circ_0002931	13	24673031	24677873	+	4842	303	ENSMUSG00000036006;	exon:24673032-24673110,exon:24674647-24674670,exon:24675775-24675828,exon:24677724-24677873	HSD_2	2	29	Ripor2	RIPOR family member 3||Rho family-interacting cell polarization regulator 2||Armadillo-type fold||Armadillo-like helical||FAM65, N-terminal||-	0	0	0	0	0	0	0	2	0	0	0	0	0	0	0	0	28.8717	0	0.53338	0	1.5621	0.70028	0.98499	FALSE	0	0	NA	NA	NA	NA	0	0.563036	-1.7139	0.67182	0.99144	FALSE
novel_circ_0002930	13	24669959	24680691	+	10732	63	ENSMUSG00000036006;	exon:24680628-24680691	HFD_2	2	36	Ripor2	RIPOR family member 3||Rho family-interacting cell polarization regulator 2||Armadillo-type fold||Armadillo-like helical||FAM65, N-terminal||-	0	0	0	0	2	0	0	0	0	0	0	0	0	33.7024	0	0	0	0	0	0	NA	NA	NA	NA	0.634361	0	1.7334	0.66753	0.98087	FALSE	0.652478	0	1.8143	0.65303	0.99144	FALSE
novel_circ_0002933	13	24804781	24810020	+	5239	176	ENSMUSG00000019132;	exon:24804782-24804958	HFD_1	2	74	BC005537	Protein of unknown function DUF4566	0	0	0	2	0	0	0	0	0	0	0	0	28.1551	0	0	0	0	0	0	0	NA	NA	NA	NA	0.534108	0	1.5189	0.70802	0.98087	FALSE	0.557583	0	1.6184	0.68858	0.99144	FALSE
novel_circ_0005612	17	42377159	42377640	+	481	480	ENSMUSG00000042256;	exon:42377160-42377640	CON_1,CON_3,HSD_3	7,5,3	1,1,0	Ptchd4	Sterol-sensing domain||Protein patched/dispatched	7	0	5	0	0	0	0	0	3	137.546	0	95.3053	0	0	0	0	0	59.6101	1.03942	4.21278	-2.0414	0.41793	0.98499	FALSE	0	4.33247	-4.6643	0.18543	0.98087	FALSE	0	1.1044	-2.6386	0.50819	0.99144	FALSE
novel_circ_0002939	13	27511438	27561595	-	50157	145	n/a	intergenic_region:27560500-27560607,intergenic_region:27561557-27561595	CON_2	2	2773	--	-	0	2	0	0	0	0	0	0	0	0	33.8805	0	0	0	0	0	0	0	0	0.615455	-1.8435	0.6488	0.98499	FALSE	0	0.633264	-1.9087	0.63725	0.98087	FALSE	0	0	NA	NA	NA	NA
novel_circ_0009767	2	78913673	78920209	+	6536	530	ENSMUSG00000027011;	exon:78913674-78913806,exon:78918687-78918834,exon:78919958-78920209	CON_1,CON_2,CON_3,HFD_1,HFD_2,HFD_3,HSD_1,HSD_2,HSD_3	58,28,69,31,61,24,36,46,35	11,15,16,23,5,10,10,12,14	Ube2e3	Ubiquitin-conjugating enzyme/RWD-like||Ubiquitin-conjugating enzyme E2||-||Ubiquitin-conjugating enzyme, active site	58	28	69	31	61	24	36	46	35	1139.67	474.327	1315.21	436.405	1027.92	454.528	671.504	664.049	695.452	36.5028	52.9426	-0.52998	0.14177	0.98499	FALSE	36.0021	54.4911	-0.59666	0.30853	0.98087	FALSE	37.1024	38.9401	-0.071899	0.84675	0.99761	FALSE
novel_circ_0009766	2	77719450	77720699	-	1249	147	ENSMUSG00000027016;	exon:77720552-77720699	CON_1,HFD_3,HSD_2	6,3,4	1,0,0	Zfp385b	Zinc finger C2H2-type||Matrin/U1-C-like, C2H2-type zinc finger||Zinc finger C2H2 superfamily	6	0	0	0	0	3	0	4	0	117.897	0	0	0	0	56.816	0	57.7434	0	1.06676	2.14665	-0.98623	0.79775	0.9996	FALSE	1.04692	2.20145	-1.0828	0.77855	0.99903	FALSE	1.06991	1.12607	-0.11611	0.97309	0.99761	FALSE
novel_circ_0009761	2	77124121	77170607	-	46486	222	ENSMUSG00000044033;	exon:77170385-77170607	HFD_1,HSD_2,HSD_3	2,5,4	44,57,21	Ccdc141	Immunoglobulin-like domain superfamily||-||Immunoglobulin subtype 2||Immunoglobulin-like domain||Spectrin/alpha-actinin||Immunoglobulin I-set||Immunoglobulin-like fold||Immunoglobulin subtype	0	0	0	2	0	0	0	5	4	0	0	0	28.1551	0	0	0	72.1792	79.4802	2.71934	0	3.8809	0.20221	0.98499	FALSE	0.534108	0	1.5189	0.70802	0.98087	FALSE	0.557583	2.88012	-2.3137	0.35587	0.99144	FALSE
novel_circ_0009760	2	77124121	77132373	-	8252	191	ENSMUSG00000044033;	exon:77132182-77132373	HFD_2	3	93	Ccdc141	Immunoglobulin-like domain superfamily||-||Immunoglobulin subtype 2||Immunoglobulin-like domain||Spectrin/alpha-actinin||Immunoglobulin I-set||Immunoglobulin-like fold||Immunoglobulin subtype	0	0	0	0	3	0	0	0	0	0	0	0	0	50.5536	0	0	0	0	0	0	NA	NA	NA	NA	0.951542	0	2.3196	0.5613	0.98087	FALSE	0.978717	0	2.4003	0.54776	0.99144	FALSE
novel_circ_0009763	2	77168510	77170607	-	2097	344	ENSMUSG00000044033;	exon:77168511-77168633,exon:77170385-77170607	CON_2,HFD_1,HFD_2,HSD_3	3,3,6,3	39,65,67,38	Ccdc141	Immunoglobulin-like domain superfamily||-||Immunoglobulin subtype 2||Immunoglobulin-like domain||Spectrin/alpha-actinin||Immunoglobulin I-set||Immunoglobulin-like fold||Immunoglobulin subtype	0	3	0	3	6	0	0	0	3	0	50.8208	0	42.2327	101.107	0	0	0	59.6101	1.03942	0.923183	0.1424	0.96779	0.9996	FALSE	2.70425	0.949895	1.4837	0.52912	0.98087	FALSE	2.79381	1.1044	1.3736	0.54589	0.99144	FALSE
novel_circ_0009762	2	77124121	77173607	-	49486	118	n/a	intergenic_region:77173489-77173607	HFD_1,HFD_2,HSD_1,HSD_3	3,9,3,3	31,51,13,16	--	-	0	0	0	3	9	0	3	0	3	0	0	0	42.2327	151.661	0	55.9587	0	59.6101	2.04846	0	3.4628	0.31212	0.98499	FALSE	3.65579	0	4.2647	0.23302	0.98087	FALSE	3.77253	2.19654	0.81271	0.61429	0.99144	FALSE
mmu_circ_0000864	18	39097629	39111900	+	14271	443	ENSMUSG00000036452;	exon:39097630-39097725,exon:39099572-39099633,exon:39102169-39102240,exon:39110455-39110556,exon:39111790-39111900	CON_1,CON_3,HFD_1,HFD_2,HFD_3,HSD_2	8,8,5,8,5,5	5,6,6,3,8,7	Arhgap26	SH3 domain||Rho GTPase-activating protein domain||-||Pleckstrin homology domain||GRAF, BAR domain||AH/BAR domain superfamily||SH3-like domain superfamily||PH-like domain superfamily||GRAF, SH3 domain||Rho GTPase activation protein||Rho GTPase-activating protein 26	8	0	8	5	8	5	0	5	0	157.196	0	152.488	70.3878	134.809	94.6934	0	72.1792	0	1.33345	5.59557	-2.0363	0.43674	0.98499	FALSE	5.61759	5.75785	-0.024161	0.98018	0.99903	FALSE	5.78705	1.40759	1.9394	0.16441	0.99144	FALSE
mmu_circ_0000865	18	39120118	39150118	+	30000	510	ENSMUSG00000036452;	exon:39120119-39120223,exon:39121774-39121903,exon:39132056-39132150,exon:39150040-39150118	CON_1,CON_2,CON_3,HFD_1,HFD_2,HFD_3,HSD_1,HSD_2,HSD_3	10,7,19,17,14,31,13,21,22	6,10,10,3,5,5,6,8,5	Arhgap26	SH3 domain||Rho GTPase-activating protein domain||-||Pleckstrin homology domain||GRAF, BAR domain||AH/BAR domain superfamily||SH3-like domain superfamily||PH-like domain superfamily||GRAF, SH3 domain||Rho GTPase activation protein||Rho GTPase-activating protein 26	10	7	19	17	14	31	13	21	22	196.495	118.582	362.16	239.319	235.917	587.099	242.488	303.153	437.141	17.5954	12.2236	0.53045	0.33543	0.98499	FALSE	19.7987	12.5891	0.64799	0.24655	0.98087	FALSE	20.3625	18.7434	0.10797	0.82545	0.99761	FALSE
mmu_circ_0000866	18	39126832	39150118	+	23286	275	ENSMUSG00000036452;	exon:39126833-39126933,exon:39132056-39132150,exon:39150040-39150118	CON_1,CON_2,CON_3,HFD_1,HFD_2,HFD_3,HSD_1,HSD_2,HSD_3	5,4,3,7,2,5,4,3,3	14,42,39,28,21,35,16,27,20	Arhgap26	SH3 domain||Rho GTPase-activating protein domain||-||Pleckstrin homology domain||GRAF, BAR domain||AH/BAR domain superfamily||SH3-like domain superfamily||PH-like domain superfamily||GRAF, SH3 domain||Rho GTPase activation protein||Rho GTPase-activating protein 26	5	4	3	7	2	5	4	3	3	98.2473	67.761	57.1832	98.543	33.7024	94.6934	74.6116	43.3075	59.6101	3.18487	4.0448	-0.34977	0.76268	0.99841	FALSE	4.24861	4.15954	0.03801	0.97104	0.99903	FALSE	4.3872	3.40514	0.37905	0.73565	0.9976	FALSE
mmu_circ_0000867	18	39227367	39246924	+	19557	394	ENSMUSG00000036452;	exon:39227368-39227433,exon:39229891-39229965,exon:39243606-39243693,exon:39245283-39245341,exon:39246819-39246924	CON_2,CON_3,HFD_3,HSD_2	4,3,4,7	5,4,11,14	Arhgap26	SH3 domain||Rho GTPase-activating protein domain||-||Pleckstrin homology domain||GRAF, BAR domain||AH/BAR domain superfamily||SH3-like domain superfamily||PH-like domain superfamily||GRAF, SH3 domain||Rho GTPase activation protein||Rho GTPase-activating protein 26	0	4	3	0	0	4	0	7	0	0	67.761	57.1832	0	0	75.7547	0	101.051	0	1.86683	2.25592	-0.2471	0.90908	0.9996	FALSE	1.3959	2.32499	-0.77226	0.73938	0.98962	FALSE	1.42654	1.97062	-0.48816	0.89868	0.99761	FALSE
mmu_circ_0000860	18	35152600	35154540	+	1940	303	ENSMUSG00000037815;	exon:35152601-35152707,exon:35154345-35154540	CON_1,CON_2,CON_3,HFD_1,HFD_2,HFD_3,HSD_1,HSD_2,HSD_3	19,32,27,29,19,16,17,33,27	1.86328e+26	Ctnna1	Vinculin, conserved site||Alpha-catenin||-||Vinculin/alpha-catenin||Alpha-catenin/vinculin-like superfamily	19	32	27	29	19	16	17	33	27	373.34	542.088	514.648	408.249	320.173	303.019	317.099	476.383	536.491	23.8734	25.8701	-0.11675	0.77408	0.99898	FALSE	19.3546	26.6297	-0.45567	0.27119	0.98087	FALSE	19.9897	25.4185	-0.34212	0.41859	0.99144	FALSE
mmu_circ_0000861	18	35610870	35613502	+	2632	344	ENSMUSG00000037058;	exon:35610871-35611034,exon:35613323-35613502	CON_1,CON_2,CON_3,HFD_1,HFD_2,HFD_3,HSD_1,HSD_2,HSD_3	1.14123e+26	48,92,57,51,70,64,32,88,47	Paip2	Polyadenylate-binding protein-interacting protein 2-like||Ataxin-2, C-terminal	114	123	124	130	142	136	101	185	101	2240.04	2083.65	2363.57	1830.08	2392.87	2575.66	1883.94	2670.63	2006.88	118.302	121.004	-0.02548	0.90969	0.9996	FALSE	127.217	124.523	0.026851	0.89647	0.99903	FALSE	131.071	126.031	0.046817	0.83627	0.99761	FALSE
mmu_circ_0000862	18	36583611	36594322	+	10711	715	ENSMUSG00000024483;	exon:36583612-36583759	CON_2,HFD_2,HFD_3,HSD_1,HSD_2,HSD_3	3,3,6,10,2,3	59,71,61,46,66,52	Ankhd1	-||K Homology domain||K Homology domain, type 1 superfamily||Ankyrin repeat||K Homology domain, type 1||Ankyrin repeat-containing domain||Ankyrin repeat-containing domain superfamily	0	3	0	0	3	6	10	2	3	0	50.8208	0	0	50.5536	113.632	186.529	28.8717	59.6101	4.93626	0.923183	2.3593	0.15981	0.98499	FALSE	3.04539	0.949895	1.6358	0.46299	0.98087	FALSE	3.11853	5.30791	-0.78529	0.52671	0.99144	FALSE
novel_circ_0001829	11	95350511	95351171	+	660	326	ENSMUSG00000038893;	intron:95350512-95350660,intron:95350993-95351171	CON_2	2	3	Fam117a	Glucocorticoid-induced transcript 1/FAM117	0	2	0	0	0	0	0	0	0	0	33.8805	0	0	0	0	0	0	0	0	0.615455	-1.8435	0.6488	0.98499	FALSE	0	0.633264	-1.9087	0.63725	0.98087	FALSE	0	0	NA	NA	NA	NA
novel_circ_0014447	7	66294793	66295525	-	732	326	ENSMUSG00000015133;	exon:66294794-66295008,exon:66295413-66295525	HFD_1	3	11	Lrrk1	Leucine-rich repeat||C-terminal of Roc (COR) domain||Roc domain||P-loop containing nucleoside triphosphate hydrolase||Ankyrin repeat-containing domain||Leucine-rich repeat domain superfamily||Protein kinase domain||-||Ankyrin repeat-containing domain superfamily||Quinoprotein amine dehydrogenase, beta chain-like||Protein kinase-like domain superfamily||Ankyrin repeat||Leucine-rich repeat, typical…	0	0	0	3	0	0	0	0	0	0	0	0	42.2327	0	0	0	0	0	0	0	NA	NA	NA	NA	0.801163	0	2.0951	0.6011	0.98087	FALSE	0.836375	0	2.1951	0.58373	0.99144	FALSE
novel_circ_0014445	7	65980146	65983849	+	3703	324	ENSMUSG00000030513;	exon:65980147-65980335,exon:65983713-65983849	CON_1,CON_2,CON_3,HFD_1,HFD_2,HFD_3,HSD_1,HSD_2,HSD_3	6,20,8,16,18,8,12,12,6	50,100,99,44,117,45,56,97,129	Pcsk6	Growth factor receptor domain 4||Peptidase S8, subtilisin, His-active site||Kexin/furin catalytic domain||PLAC||Growth factor receptor cysteine-rich domain superfamily||EGF-like domain||Peptidase S8/S53 domain superfamily||Peptidase S8, pro-domain||P domain||Peptidase S8, subtilisin, Ser-active site||Furin-like repeat||Peptidase S8, pro-domain superfamily||Galactose-binding-like domain superfamil…	6	20	8	16	18	8	12	12	6	117.897	338.805	152.488	225.241	303.321	151.509	223.835	173.23	119.22	9.31527	11.0346	-0.25427	0.69974	0.98499	FALSE	12.7739	11.3567	0.16037	0.79146	0.99903	FALSE	13.1861	9.95557	0.40881	0.4966	0.99144	FALSE
novel_circ_0014442	7	65336031	65343739	-	7708	124	ENSMUSG00000030516;	exon:65343615-65343739	CON_1,HFD_1,HFD_2,HSD_1,HSD_2,HSD_3	6,8,2,2,7,3	31,45,44,27,75,40	Tjp1	P-loop containing nucleoside triphosphate hydrolase||SH3-like domain superfamily||Guanylate kinase-like domain||SH3 domain||-||Guanylate kinase/L-type calcium channel beta subunit||ZO-1, SH3 domain||PDZ superfamily||ZU5 domain||Tight junction protein ZO||Tight junction protein ZO-1||PDZ domain	6	0	0	8	2	0	2	7	3	117.897	0	0	112.621	33.7024	0	37.3058	101.051	59.6101	3.57894	2.14665	0.76847	0.64023	0.98499	FALSE	2.77079	2.20145	0.34873	0.89963	0.99903	FALSE	2.88281	3.80312	-0.38009	0.78049	0.99761	FALSE
novel_circ_0014443	7	65927193	65931765	+	4572	307	ENSMUSG00000030513;	exon:65927816-65927959,exon:65929107-65929183,exon:65931677-65931765	CON_2,HFD_2,HSD_2	3,6,2	74,115,87	Pcsk6	Growth factor receptor domain 4||Peptidase S8, subtilisin, His-active site||Kexin/furin catalytic domain||PLAC||Growth factor receptor cysteine-rich domain superfamily||EGF-like domain||Peptidase S8/S53 domain superfamily||Peptidase S8, pro-domain||P domain||Peptidase S8, subtilisin, Ser-active site||Furin-like repeat||Peptidase S8, pro-domain superfamily||Galactose-binding-like domain superfamil…	0	3	0	0	6	0	0	2	0	0	50.8208	0	0	101.107	0	0	28.8717	0	0.53338	0.923183	-0.76785	0.84066	0.9996	FALSE	1.90308	0.949895	0.98936	0.79815	0.99903	FALSE	1.95743	0.563036	1.7458	0.59432	0.99144	FALSE
novel_circ_0014441	7	6389432	6390560	+	1128	126	ENSMUSG00000062861;	exon:6389433-6389559	HFD_1	2	0	Zfp28	KRAB domain superfamily||-||Zinc finger C2H2 superfamily||Krueppel-associated box||Zinc finger C2H2-type	0	0	0	2	0	0	0	0	0	0	0	0	28.1551	0	0	0	0	0	0	0	NA	NA	NA	NA	0.534108	0	1.5189	0.70802	0.98087	FALSE	0.557583	0	1.6184	0.68858	0.99144	FALSE
novel_circ_0014448	7	66330668	66333286	-	2618	319	ENSMUSG00000015133;	exon:66330669-66330817,exon:66333115-66333286	CON_2,CON_3,HFD_1,HFD_2,HFD_3,HSD_1,HSD_2,HSD_3	2,4,4,9,3,6,4,3	38,14,17,24,12,11,37,32	Lrrk1	Leucine-rich repeat||C-terminal of Roc (COR) domain||Roc domain||P-loop containing nucleoside triphosphate hydrolase||Ankyrin repeat-containing domain||Leucine-rich repeat domain superfamily||Protein kinase domain||-||Ankyrin repeat-containing domain superfamily||Quinoprotein amine dehydrogenase, beta chain-like||Protein kinase-like domain superfamily||Ankyrin repeat||Leucine-rich repeat, typical…	0	2	4	4	9	3	6	4	3	0	33.8805	76.2442	56.3103	151.661	56.816	111.917	57.7434	59.6101	4.12426	1.98214	1.0475	0.46143	0.98499	FALSE	4.96977	2.04455	1.274	0.329	0.98087	FALSE	5.12122	4.41475	0.22018	0.82529	0.99761	FALSE
novel_circ_0014449	7	66411501	66422315	-	10814	293	ENSMUSG00000015134;	exon:66411502-66411630,exon:66412358-66412419,exon:66422211-66422315	HFD_1,HSD_1	4,3	160156	Aldh1a3	Aldehyde dehydrogenase, C-terminal||Aldehyde dehydrogenase domain||Aldehyde/histidinol dehydrogenase||Aldehyde dehydrogenase, N-terminal||Aldehyde dehydrogenase, glutamic acid active site||Aldehyde dehydrogenase, cysteine active site||Aldehyde dehydrogenase NAD(P)-dependent	0	0	0	4	0	0	3	0	0	0	0	0	56.3103	0	0	55.9587	0	0	1.00904	0	2.4402	0.54079	0.98499	FALSE	1.06822	0	2.5053	0.52931	0.98087	FALSE	1.11517	1.09214	0.061384	0.98575	0.99761	FALSE
novel_circ_0009589	2	60792688	60842472	-	49784	324	ENSMUSG00000026970;	exon:60792689-60792780,exon:60797684-60797742,exon:60842297-60842472	CON_1,CON_3,HFD_1,HFD_2,HFD_3,HSD_2,HSD_3	6,2,11,4,2,9,2	91,95,120,68,75,142,99	Rbms1	RNA recognition motif domain||MSSP-1, RNA recognition motif 1||RNA-binding domain superfamily||Nucleotide-binding alpha-beta plait domain superfamily||Paraneoplastic encephalomyelitis antigen	6	0	2	11	4	2	0	9	2	117.897	0	38.1221	154.853	67.4047	37.8774	0	129.923	39.7401	3.09316	2.82999	0.16594	0.91925	0.9996	FALSE	4.90427	2.9071	0.79361	0.52497	0.98087	FALSE	5.08493	3.26992	0.61005	0.61625	0.99144	FALSE
novel_circ_0009588	2	60781860	60797742	-	15882	306	ENSMUSG00000026970;	exon:60781861-60782018,exon:60792689-60792780,exon:60797684-60797742	HFD_1	3	93	Rbms1	RNA recognition motif domain||MSSP-1, RNA recognition motif 1||RNA-binding domain superfamily||Nucleotide-binding alpha-beta plait domain superfamily||Paraneoplastic encephalomyelitis antigen	0	0	0	3	0	0	0	0	0	0	0	0	42.2327	0	0	0	0	0	0	0	NA	NA	NA	NA	0.801163	0	2.0951	0.6011	0.98087	FALSE	0.836375	0	2.1951	0.58373	0.99144	FALSE
novel_circ_0009581	2	60232199	60234997	+	2798	167	ENSMUSG00000026977;	exon:60232200-60232367	CON_1,CON_2,CON_3,HFD_1,HFD_2,HSD_1	8,3,4,8,8,7	13,29,29,37,27,17	2023-03-07	Zinc finger, RING/FYVE/PHD-type||Zinc finger, RING-CH-type	8	3	4	8	8	0	7	0	0	157.196	50.8208	76.2442	112.621	134.809	0	130.57	0	0	2.35442	5.15207	-1.1423	0.52053	0.98499	FALSE	4.67388	5.29645	-0.15225	0.88443	0.99903	FALSE	4.84024	2.54833	0.9357	0.74127	0.99761	FALSE
novel_circ_0009580	2	60076869	60083751	-	6882	306	ENSMUSG00000026987;	intron:60076870-60076911,intron:60079282-60079421,intron:60083625-60083751	CON_1,HSD_2,HSD_3	2,2,3	10,23,13	Baz2b	DDT domain||Zinc finger, PHD-finger||Zinc finger, PHD-type||Bromodomain-like superfamily||Zinc finger, FYVE/PHD-type||Zinc finger, RING/FYVE/PHD-type||Methyl-CpG DNA binding||WHIM2 domain||BAZ2A/BAZ2B, bromodomain||Bromodomain||Bromodomain, conserved site||DNA-binding domain superfamily	2	0	0	0	0	0	0	2	3	39.2989	0	0	0	0	0	0	28.8717	59.6101	1.5728	0.71555	1.1541	0.70467	0.98713	FALSE	0	0.733817	-2.0934	0.60355	0.98087	FALSE	0	1.66743	-3.2438	0.38318	0.99144	FALSE
novel_circ_0009582	2	60495254	60515700	-	20446	323	ENSMUSG00000054580;	exon:60495255-60495367,exon:60497560-60497658,exon:60515587-60515700	CON_3,HFD_1,HFD_2,HSD_1,HSD_2	6,4,4,6,4	6,24,32,6,30	Pla2r1	C-type lectin, conserved site||Ricin B, lectin domain||Fibronectin type II domain superfamily||C-type lectin-like/link domain superfamily||C-type lectin fold||C-type lectin-like||Ricin B-like lectins||Fibronectin type II domain	0	0	6	4	4	0	6	4	0	0	0	114.366	56.3103	67.4047	0	111.917	57.7434	0	3.08484	2.05003	0.59314	0.82487	0.9996	FALSE	2.33694	2.11693	0.15211	0.95343	0.99903	FALSE	2.42012	3.31036	-0.43836	0.78439	0.99761	FALSE
novel_circ_0009584	2	60502038	60515700	-	13662	270	ENSMUSG00000054580;	exon:60502039-60502196,exon:60515587-60515700	CON_2,HFD_2,HFD_3,HSD_1,HSD_2,HSD_3	2,3,4,3,6,3	24,33,27,7,44,26	Pla2r1	C-type lectin, conserved site||Ricin B, lectin domain||Fibronectin type II domain superfamily||C-type lectin-like/link domain superfamily||C-type lectin fold||C-type lectin-like||Ricin B-like lectins||Fibronectin type II domain	0	2	0	0	3	4	3	6	3	0	33.8805	0	0	50.5536	75.7547	55.9587	86.6151	59.6101	3.6486	0.615455	2.518	0.20565	0.98499	FALSE	2.34744	0.633264	1.8482	0.49836	0.98087	FALSE	2.40526	3.88564	-0.72957	0.5995	0.99144	FALSE
novel_circ_0004692	15	89352152	89352527	-	375	279	ENSMUSG00000022614;	exon:89352153-89352264,exon:89352359-89352527	CON_1	3	6	Lmf2	-||Lipase maturation factor	3	0	0	0	0	0	0	0	0	58.9484	0	0	0	0	0	0	0	0	0	1.07332	-2.6209	0.51123	0.98499	FALSE	0	1.10073	-2.6818	0.50149	0.98087	FALSE	0	0	NA	NA	NA	NA
novel_circ_0004693	15	89352603	89352955	-	352	278	ENSMUSG00000022614;	exon:89352604-89352786,exon:89352859-89352955	CON_2	3	44	Lmf2	-||Lipase maturation factor	0	3	0	0	0	0	0	0	0	0	50.8208	0	0	0	0	0	0	0	0	0.923183	-2.4234	0.54478	0.98499	FALSE	0	0.949895	-2.4887	0.534	0.98087	FALSE	0	0	NA	NA	NA	NA
novel_circ_0004691	15	89305543	89306293	-	750	303	ENSMUSG00000036529;	exon:89305544-89305657,exon:89305995-89306072,exon:89306180-89306293	CON_2	6	59	Sbf1	Myotubularin-like phosphatase domain||PH-like domain superfamily||Protein-tyrosine phosphatase-like||uDENN domain||Tripartite DENN domain||cDENN domain||SBF1/SBF2 domain||Myotubularin-related protein 5||Pleckstrin homology domain||GRAM domain||-||dDENN domain||Myotubularin family	0	6	0	0	0	0	0	0	0	0	101.642	0	0	0	0	0	0	0	0	1.84637	-3.4179	0.38412	0.98499	FALSE	0	1.89979	-3.4835	0.36557	0.98087	FALSE	0	0	NA	NA	NA	NA
novel_circ_0004695	15	89501403	89521373	+	19970	449	ENSMUSG00000022623;	exon:89501404-89501475,exon:89503120-89503228,exon:89521103-89521373	CON_1,HFD_1	2,4	5,3	Shank3	Ankyrin repeat||PDZ domain||Sterile alpha motif domain||Ankyrin repeat-containing domain superfamily||PDZ superfamily||-||SH3 domain||Sterile alpha motif/pointed domain superfamily||PDZ domain 6||Ankyrin repeat-containing domain||SH3-like domain superfamily	2	0	0	4	0	0	0	0	0	39.2989	0	0	56.3103	0	0	0	0	0	0	0.71555	-2.0323	0.61412	0.98499	FALSE	1.06822	0.733817	0.5748	0.87245	0.99903	FALSE	1.11517	0	2.6058	0.51284	0.99144	FALSE
novel_circ_0007353	1	131872066	131872606	+	540	261	ENSMUSG00000026433;	exon:131872067-131872188,exon:131872466-131872606	HFD_2	2	11	Rab29	Small GTPase||Ras-related protein Rab29/Rab38/Rab32||P-loop containing nucleoside triphosphate hydrolase||Small GTP-binding protein domain||-	0	0	0	0	2	0	0	0	0	0	0	0	0	33.7024	0	0	0	0	0	0	NA	NA	NA	NA	0.634361	0	1.7334	0.66753	0.98087	FALSE	0.652478	0	1.8143	0.65303	0.99144	FALSE
novel_circ_0007350	1	131355510	131356905	-	1395	343	ENSMUSG00000026425;	exon:131355511-131355639,exon:131356690-131356905	HFD_3	2	12	Srgap2	AH/BAR domain superfamily||FCH domain||SH3-like domain superfamily||srGAP1/2/3, SH3 domain||Rho GTPase-activating protein domain||SH3 domain||F-BAR domain||SLIT-ROBO Rho GTPase-activating protein 2||Rho GTPase activation protein	0	0	0	0	0	2	0	0	0	0	0	0	0	0	37.8774	0	0	0	0	0	NA	NA	NA	NA	0.697949	0	1.854	0.64509	0.98087	FALSE	0.713271	0	1.9267	0.63226	0.99144	FALSE
novel_circ_0007356	1	132019349	132031625	+	12276	177	ENSMUSG00000026436;	exon:132019350-132019466,exon:132031564-132031625	HSD_1	3	8	Elk4	Winged helix DNA-binding domain superfamily||-||Winged helix-like DNA-binding domain superfamily||Ets domain	0	0	0	0	0	0	3	0	0	0	0	0	0	0	0	55.9587	0	0	1.00904	0	2.4402	0.54079	0.98499	FALSE	0	0	NA	NA	NA	NA	0	1.09214	-2.6239	0.51065	0.99144	FALSE
novel_circ_0007357	1	132052379	132054224	-	1845	280	ENSMUSG00000059149;	exon:132053549-132053664,exon:132054059-132054224	CON_3	2	3	Mfsd4a	-||Major facilitator superfamily||MFS transporter superfamily||Major facilitator superfamily domain	0	0	2	0	0	0	0	0	0	0	0	38.1221	0	0	0	0	0	0	0	0.683342	-1.9743	0.6247	0.98499	FALSE	0	0.705644	-2.0441	0.61248	0.98087	FALSE	0	0	NA	NA	NA	NA
novel_circ_0007355	1	131928063	131929762	+	1699	152	ENSMUSG00000026434;	exon:131928064-131928216	HFD_1,HSD_1	2,4	69,42	Nucks1	Nuclear ubiquitous casein and cyclin-dependent kinase substrate 1	0	0	0	2	0	0	4	0	0	0	0	0	28.1551	0	0	74.6116	0	0	1.34538	0	2.8571	0.47162	0.98499	FALSE	0.534108	0	1.5189	0.70802	0.98087	FALSE	0.557583	1.45619	-1.3435	0.70799	0.99614	FALSE
novel_circ_0001004	11	120967994	120969194	-	1200	310	ENSMUSG00000025162;	exon:120967995-120968134,exon:120969023-120969194	HSD_3	2	111	Csnk1d	Protein kinase-like domain superfamily||Protein kinase domain||-||Protein kinase, ATP binding site||Serine/threonine-protein kinase, active site	0	0	0	0	0	0	0	0	2	0	0	0	0	0	0	0	0	39.7401	0.692946	0	1.8892	0.63904	0.98499	FALSE	0	0	NA	NA	NA	NA	0	0.736264	-2.0487	0.61104	0.99144	FALSE
novel_circ_0001005	11	120967994	120973969	-	5975	515	ENSMUSG00000025162;	exon:120967995-120968134,exon:120972966-120973194,exon:120973821-120973969	CON_2,HFD_1,HSD_2,HSD_3	3,2,5,6	153110179124	Csnk1d	Protein kinase-like domain superfamily||Protein kinase domain||-||Protein kinase, ATP binding site||Serine/threonine-protein kinase, active site	0	3	0	2	0	0	0	5	6	0	50.8208	0	28.1551	0	0	0	72.1792	119.22	3.41229	0.923183	1.8512	0.38122	0.98499	FALSE	0.534108	0.949895	-0.81043	0.82825	0.99903	FALSE	0.557583	3.61638	-2.626	0.23585	0.99144	FALSE
novel_circ_0001006	11	120971566	120983343	-	11777	258	ENSMUSG00000025162;	exon:120971567-120971715,exon:120983233-120983343	CON_1,HFD_1	2,2	97153	Csnk1d	Protein kinase-like domain superfamily||Protein kinase domain||-||Protein kinase, ATP binding site||Serine/threonine-protein kinase, active site	2	0	0	2	0	0	0	0	0	39.2989	0	0	28.1551	0	0	0	0	0	0	0.71555	-2.0323	0.61412	0.98499	FALSE	0.534108	0.733817	-0.41368	0.91416	0.99903	FALSE	0.557583	0	1.6184	0.68858	0.99144	FALSE
novel_circ_0001007	11	120972376	120983343	-	10967	280	ENSMUSG00000025162;	exon:120972377-120972547,exon:120983233-120983343	HSD_2	8	230	Csnk1d	Protein kinase-like domain superfamily||Protein kinase domain||-||Protein kinase, ATP binding site||Serine/threonine-protein kinase, active site	0	0	0	0	0	0	0	8	0	0	0	0	0	0	0	0	115.487	0	2.13352	0	3.5392	0.3445	0.98499	FALSE	0	0	NA	NA	NA	NA	0	2.25214	-3.6893	0.32219	0.99144	FALSE
novel_circ_0004520	15	75666252	75667965	-	1713	396	ENSMUSG00000000934;	exon:75666253-75666321,exon:75667420-75667605,exon:75667822-75667965	CON_1,CON_2,CON_3,HFD_1,HFD_2,HFD_3,HSD_1,HSD_2,HSD_3	10,10,6,9,13,5,6,8,9	7,14,11,10,6,5,4,11,1	Top1mt	DNA topoisomerase I, DNA binding, N-terminal domain 2||DNA topoisomerase I, DNA binding, N-terminal domain 1||DNA topoisomerase I||DNA topoisomerase I, catalytic core, eukaryotic-type||DNA breaking-rejoining enzyme, catalytic core||DNA topoisomerase I, catalytic core, alpha/beta subdomain||DNA topoisomerase I, DNA binding, eukaryotic-type, N-terminal domain superfamily||DNA topoisomerase I, eukar…	10	10	6	9	13	5	6	8	9	196.495	169.403	114.366	126.698	219.065	94.6934	111.917	115.487	178.83	7.26985	8.70505	-0.2653	0.7089	0.98774	FALSE	8.27171	8.95234	-0.11139	0.87129	0.99903	FALSE	8.53341	7.74961	0.14732	0.83686	0.99761	FALSE
novel_circ_0004521	15	75667419	75670184	-	2765	122	ENSMUSG00000000934;	exon:75670062-75670184	HFD_3,HSD_3	2,3	8,9	Top1mt	DNA topoisomerase I, DNA binding, N-terminal domain 2||DNA topoisomerase I, DNA binding, N-terminal domain 1||DNA topoisomerase I||DNA topoisomerase I, catalytic core, eukaryotic-type||DNA breaking-rejoining enzyme, catalytic core||DNA topoisomerase I, catalytic core, alpha/beta subdomain||DNA topoisomerase I, DNA binding, eukaryotic-type, N-terminal domain superfamily||DNA topoisomerase I, eukar…	0	0	0	0	0	2	0	0	3	0	0	0	0	0	37.8774	0	0	59.6101	1.03942	0	2.4794	0.53409	0.98499	FALSE	0.697949	0	1.854	0.64509	0.98087	FALSE	0.713271	1.1044	-0.64033	0.86269	0.99761	FALSE
novel_circ_0001002	11	120818960	120819161	+	201	200	ENSMUSG00000025153;	exon:120818961-120819161	HSD_3	2	289	Fasn	Beta-ketoacyl synthase, N-terminal||Acyl transferase||S-adenosyl-L-methionine-dependent methyltransferase||Polyketide synthase, ketoreductase domain||Methyltransferase type 12||Thiolase-like||Fatty acid synthase, domain 2||Polyketide synthase, acyl transferase domain||-||Phosphopantetheine binding ACP domain||Polyketide synthase, beta-ketoacyl synthase domain||NAD(P)-binding domain superfamily||A…	0	0	0	0	0	0	0	0	2	0	0	0	0	0	0	0	0	39.7401	0.692946	0	1.8892	0.63904	0.98499	FALSE	0	0	NA	NA	NA	NA	0	0.736264	-2.0487	0.61104	0.99144	FALSE
mmu_circ_0001413	5	130016096	130018916	-	2820	395	ENSMUSG00000025533;	exon:130016097-130016174,exon:130016296-130016373,exon:130018833-130018916	CON_1,CON_2,CON_3,HFD_1,HFD_2,HFD_3,HSD_1,HSD_2,HSD_3	5,5,11,11,8,10,10,14,4	29,94,100,40,81,67,48,42,31	Asl	Argininosuccinate lyase||Argininosuccinate lyase, C-terminal||Fumarase/histidase, N-terminal||Fumarate lyase family||Fumarate lyase, conserved site||L-Aspartase-like||Fumarate lyase, N-terminal	5	5	11	11	8	10	10	14	4	98.2473	84.7013	209.672	154.853	134.809	189.387	186.529	202.102	79.4802	8.48301	7.08589	0.27545	0.71515	0.98984	FALSE	8.96479	7.29875	0.29879	0.67354	0.98087	FALSE	9.24298	9.05425	0.01413	0.98326	0.99761	FALSE
novel_circ_0001008	11	121285421	121290890	+	5469	146	ENSMUSG00000039275;	exon:121290744-121290890	HFD_3,HSD_1,HSD_3	4,2,4	22,9,11	Foxk2	Winged helix DNA-binding domain superfamily||SMAD/FHA domain superfamily||Winged helix-like DNA-binding domain superfamily||Fork head domain conserved site 2||Fork head domain conserved site1||Fork head domain||Forkhead-associated (FHA) domain	0	0	0	0	0	4	2	0	4	0	0	0	0	0	75.7547	37.3058	0	79.4802	2.05858	0	3.4695	0.31141	0.98499	FALSE	1.3959	0	2.864	0.47022	0.98087	FALSE	1.42654	2.20062	-0.63725	0.79089	0.99761	FALSE
novel_circ_0001009	11	121335383	121341215	-	5832	188	ENSMUSG00000025173;	exon:121338557-121338644,exon:121341114-121341215	CON_1,CON_3,HFD_1,HSD_2,HSD_3	3,4,9,2,5	6,5,4,9,9	Wdr45b	WD40 repeat||WD40/YVTN repeat-like-containing domain superfamily||WD40-repeat-containing domain superfamily	3	0	4	9	0	0	0	2	5	58.9484	0	76.2442	126.698	0	0	0	28.8717	99.3502	2.26575	2.44001	-0.10607	0.95403	0.9996	FALSE	2.40349	2.51201	-0.044626	0.98693	0.99903	FALSE	2.50912	2.40369	0.078075	0.97755	0.99761	FALSE
novel_circ_0003519	14	121594335	121599821	-	5486	360	ENSMUSG00000025558;	exon:121594336-121594383,exon:121595542-121595608,exon:121597642-121597756,exon:121599688-121599821	CON_2	3	62	Dock9	Armadillo-type fold||Pleckstrin homology domain||Dedicator of cytokinesis C/D, N-terminal||-||DHR-1 domain||Dedicator of cytokinesis D, C2 domain||Dedicator of cytokinesis, C-terminal||Dedicator of cytokinesis||DHR-2 domain||PH-like domain superfamily||C2 domain superfamily||Dedicator of cytokinesis 9	0	3	0	0	0	0	0	0	0	0	50.8208	0	0	0	0	0	0	0	0	0.923183	-2.4234	0.54478	0.98499	FALSE	0	0.949895	-2.4887	0.534	0.98087	FALSE	0	0	NA	NA	NA	NA
novel_circ_0016518	X	100664735	100669970	+	5235	236	ENSMUSG00000034311;	exon:100665673-100665848,exon:100669909-100669970	HSD_2	4	5	Kif4	Kinesin-like protein||P-loop containing nucleoside triphosphate hydrolase||Kinesin motor domain, conserved site||Kinesin motor domain superfamily||Tesmin/TSO1-like CXC domain||Kinesin motor domain	0	0	0	0	0	0	0	4	0	0	0	0	0	0	0	0	57.7434	0	1.06676	0	2.5468	0.52266	0.98499	FALSE	0	0	NA	NA	NA	NA	0	1.12607	-2.6973	0.49846	0.99144	FALSE
novel_circ_0016519	X	100664735	100680114	+	15379	279	ENSMUSG00000034311;	exon:100664736-100664852,exon:100679846-100679904,exon:100680009-100680114	HSD_2	3	4	Kif4	Kinesin-like protein||P-loop containing nucleoside triphosphate hydrolase||Kinesin motor domain, conserved site||Kinesin motor domain superfamily||Tesmin/TSO1-like CXC domain||Kinesin motor domain	0	0	0	0	0	0	0	3	0	0	0	0	0	0	0	0	43.3075	0	0.800071	0	2.1371	0.59397	0.98499	FALSE	0	0	NA	NA	NA	NA	0	0.844554	-2.2881	0.56827	0.99144	FALSE
novel_circ_0016516	X	100424299	100445407	-	21108	285	n/a	intergenic_region:100424300-100424448,intergenic_region:100445270-100445407	CON_1,CON_2,CON_3,HFD_2,HFD_3,HSD_2	6,6,3,2,2,6	1,0,4,1,1,0	--	-	6	6	3	0	2	2	0	6	0	117.897	101.642	57.1832	0	33.7024	37.8774	0	86.6151	0	1.60014	5.01803	-1.5753	0.28437	0.98499	FALSE	1.33231	5.15971	-2.0016	0.14909	0.98087	FALSE	1.36575	1.68911	-0.34767	0.89665	0.99761	FALSE
novel_circ_0016517	X	10047674	10067601	-	19927	297	ENSMUSG00000090084;	exon:10047675-10047796,exon:10067425-10067601	CON_1,CON_3,HFD_2,HFD_3,HSD_1,HSD_2,HSD_3	3,4,14,7,2,5,2	22,54,80,70,18,103,78	Srpx	Domain of unknown function DUF4174||HYR domain||Sushi repeat-containing protein SRPX||Sushi/SCR/CCP superfamily||Sushi/SCR/CCP domain	3	0	4	0	14	7	2	5	2	58.9484	0	76.2442	0	235.917	132.571	37.3058	72.1792	39.7401	2.69909	2.44001	0.16914	0.91524	0.9996	FALSE	6.88335	2.51201	1.4584	0.44354	0.98087	FALSE	7.0638	2.87195	1.2673	0.27141	0.99144	FALSE
novel_circ_0003512	14	121101988	121115336	+	13348	306	ENSMUSG00000025555;	intron:121101989-121102182,intron:121115223-121115336	CON_1,CON_2,HFD_1,HFD_2,HSD_1,HSD_3	6,5,2,2,2,6	4,13,0,9,5,6	Farp1	FERM, C-terminal PH-like domain||FERM conserved site||Ubiquitin-like domain superfamily||Pleckstrin homology domain||PH-like domain superfamily||Band 4.1 domain||FERM central domain||FERM, N-terminal||Ezrin/radixin/moesin-like||FERM adjacent (FA)||Dbl homology (DH) domain||Dbl homology (DH) domain superfamily||FARP1/FARP2/FRMD7, FERM domain C-lobe||FERM/acyl-CoA-binding protein superfamily||FERM …	6	5	0	2	2	0	2	0	6	117.897	84.7013	0	28.1551	33.7024	0	37.3058	0	119.22	2.75153	3.68529	-0.44637	0.77239	0.99898	FALSE	1.16847	3.78461	-1.6716	0.34566	0.98087	FALSE	1.21006	2.93689	-1.2451	0.53699	0.99144	FALSE
novel_circ_0003513	14	121255407	121257966	+	2559	320	ENSMUSG00000025555;	exon:121255408-121255595,exon:121257833-121257966	CON_1,CON_3,HSD_2,HSD_3	2,2,6,4	30,17,46,48	Farp1	FERM, C-terminal PH-like domain||FERM conserved site||Ubiquitin-like domain superfamily||Pleckstrin homology domain||PH-like domain superfamily||Band 4.1 domain||FERM central domain||FERM, N-terminal||Ezrin/radixin/moesin-like||FERM adjacent (FA)||Dbl homology (DH) domain||Dbl homology (DH) domain superfamily||FARP1/FARP2/FRMD7, FERM domain C-lobe||FERM/acyl-CoA-binding protein superfamily||FERM …	2	0	2	0	0	0	0	6	4	39.2989	0	38.1221	0	0	0	0	86.6151	79.4802	2.98603	1.39889	1.1173	0.56006	0.98499	FALSE	0	1.43946	-3.0718	0.40605	0.98087	FALSE	0	3.16163	-4.1716	0.14054	0.99144	FALSE
novel_circ_0016512	JH584304.1	4977	14201	+	9224	227	n/a	intergenic_region:14084-14201,intergenic_region:4978-5088	CON_1,CON_2,CON_3,HFD_1,HFD_2,HSD_1,HSD_2,HSD_3	6,6,3,6,2,11,3,11	25,37,29,28,32,32,30,36	--	-	6	6	3	6	2	0	11	3	11	117.897	101.642	57.1832	84.4654	33.7024	0	205.182	43.3075	218.571	8.31108	5.01803	0.70826	0.40531	0.98499	FALSE	2.23669	5.15971	-1.16	0.34946	0.98087	FALSE	2.32523	8.89853	-1.8669	0.075894	0.99144	FALSE
novel_circ_0003515	14	121302185	121308071	-	5886	213	ENSMUSG00000063410;	exon:121302186-121302343,exon:121308015-121308071	HFD_1,HFD_2,HSD_1,HSD_3	4,4,3,2	97116124101	Stk24	Protein kinase, ATP binding site||Protein kinase domain||Protein kinase-like domain superfamily	0	0	0	4	4	0	3	0	2	0	0	0	56.3103	67.4047	0	55.9587	0	39.7401	1.70198	0	3.1954	0.37869	0.98499	FALSE	2.33694	0	3.6231	0.26371	0.98087	FALSE	2.42012	1.82841	0.43981	0.82077	0.99761	FALSE
novel_circ_0016510	JH584304.1	29421	44310	+	14889	259	n/a	intergenic_region:29422-29519,intergenic_region:31433-31499,intergenic_region:44214-44310	CON_1,CON_2,CON_3,HFD_1,HFD_2,HFD_3,HSD_1,HSD_3	3,2,2,7,4,5,2,4	31,73,24,49,25,33,54,45	--	-	3	2	2	7	4	5	2	0	4	58.9484	33.8805	38.1221	98.543	67.4047	94.6934	37.3058	0	79.4802	2.05858	2.37212	-0.2269	0.89705	0.9996	FALSE	4.88297	2.43963	1.0102	0.38179	0.98087	FALSE	5.03968	2.20062	1.243	0.33307	0.99144	FALSE
novel_circ_0003517	14	121337421	121355358	-	17937	353	ENSMUSG00000063410;	intron:121337422-121337652,intron:121355235-121355358	CON_3,HSD_3	4,3	74,41	Stk24	Protein kinase, ATP binding site||Protein kinase domain||Protein kinase-like domain superfamily	0	0	4	0	0	0	0	0	3	0	0	76.2442	0	0	0	0	0	59.6101	1.03942	1.36668	-0.40868	0.90066	0.9996	FALSE	0	1.41129	-3.046	0.44311	0.98087	FALSE	0	1.1044	-2.6386	0.50819	0.99144	FALSE
mmu_circ_0001143	3	86532084	86542711	+	10627	409	ENSMUSG00000028080;	exon:86532085-86532209,exon:86539903-86540049,exon:86542575-86542711	CON_1,CON_2,CON_3,HFD_1,HFD_2,HFD_3,HSD_1,HSD_2,HSD_3	8,10,4,19,10,9,8,3,10	15,21,22,30,29,18,13,38,22	Lrba	Domain of unknown function DUF1088||WD40 repeat||BEACH domain superfamily||WD40/YVTN repeat-like-containing domain superfamily||Domain of unknown function DUF4704||WD40-repeat-containing domain superfamily||Armadillo-like helical||PH-BEACH domain||Concanavalin A-like lectin/glucanase domain superfamily||Armadillo-type fold||BEACH domain	8	10	4	19	10	9	8	3	10	157.196	169.403	76.2442	267.474	168.512	170.448	149.223	43.3075	198.7	6.95557	7.30616	-0.097215	0.9037	0.9996	FALSE	11.3866	7.51287	0.60569	0.35915	0.98087	FALSE	11.7692	7.43825	0.70165	0.3108	0.99144	FALSE
novel_circ_0002209	12	31617074	31630893	-	13819	136	ENSMUSG00000020650;	exon:31617075-31617180,exon:31630862-31630893	CON_1,CON_3	3,6	2,1	Bcap29	BAP29/BAP31, transmembrane domain||Bap31/Bap29 cytoplasmic coiled-coil domain||B-cell receptor-associated protein 29/31	3	0	6	0	0	0	0	0	0	58.9484	0	114.366	0	0	0	0	0	0	0	3.12335	-4.1669	0.14262	0.98499	FALSE	0	3.21766	-4.2337	0.1308	0.98087	FALSE	0	0	NA	NA	NA	NA
novel_circ_0008897	2	150966077	150970132	-	4055	316	ENSMUSG00000068115;	exon:150966078-150966242,exon:150969980-150970132	HSD_1,HSD_3	3,2	2,6	Ninl	EF-Hand 1, calcium-binding site||EF-hand domain pair||EF-hand domain||-	0	0	0	0	0	0	3	0	2	0	0	0	0	0	0	55.9587	0	39.7401	1.70198	0	3.1954	0.37869	0.98499	FALSE	0	0	NA	NA	NA	NA	0	1.82841	-3.3694	0.35397	0.99144	FALSE
novel_circ_0002202	12	29973992	29975562	+	1570	142	ENSMUSG00000020674;	exon:29973993-29974064,exon:29975491-29975562	CON_1,CON_2,CON_3,HFD_1,HFD_2,HFD_3,HSD_2	10,4,14,14,12,3,11	8.71791e+19	Pxdn	Immunoglobulin subtype 2||Immunoglobulin-like domain superfamily||Peroxidasin, peroxidase domain||Leucine-rich repeat domain superfamily||Immunoglobulin I-set||Leucine-rich repeat, typical subtype||Peroxidasin||VWFC domain||Leucine-rich repeat||Immunoglobulin V-set domain||Haem peroxidase superfamily||Cysteine-rich flanking region, C-terminal||Immunoglobulin-like fold||Immunoglobulin subtype||Hae…	10	4	14	14	12	3	0	11	0	196.495	67.761	266.855	197.086	202.214	56.816	0	158.794	0	2.93359	9.59205	-1.6789	0.35704	0.98499	FALSE	8.59185	9.87512	-0.17554	0.80674	0.99903	FALSE	8.88786	3.0967	1.4928	0.41401	0.99144	FALSE
novel_circ_0002200	12	28859251	28867153	+	7902	136	ENSMUSG00000036613;	exon:28859252-28859388	CON_1,CON_2,CON_3,HFD_1,HFD_2,HFD_3,HSD_1,HSD_2,HSD_3	10,7,12,12,7,14,7,8,6	12,29,38,22,46,24,22,33,24	Eipr1	WD40/YVTN repeat-like-containing domain superfamily||WD40 repeat, conserved site||WD40 repeat||-||EARP and GARP complex-interacting protein 1||WD40-repeat-containing domain||WD40-repeat-containing domain superfamily	10	7	12	12	7	14	7	8	6	196.495	118.582	228.733	168.931	117.958	265.141	130.57	115.487	119.22	6.56678	9.83189	-0.57722	0.41185	0.98499	FALSE	10.3106	10.1194	0.025625	0.96774	0.99903	FALSE	10.6221	7.00927	0.5949	0.38499	0.99144	FALSE
novel_circ_0006228	18	34812371	34813561	+	1190	366	ENSMUSG00000038773;	exon:34812372-34812586,exon:34813409-34813561	CON_1,HFD_1,HFD_2,HSD_3	4,4,3,6	21,22,35,25	Kdm3b	-||JmjC domain	4	0	0	4	3	0	0	0	6	78.5978	0	0	56.3103	50.5536	0	0	0	119.22	2.07884	1.4311	0.53889	0.88816	0.9996	FALSE	2.01976	1.46763	0.48591	0.84115	0.99903	FALSE	2.09388	2.20879	-0.046022	0.9827	0.99761	FALSE
novel_circ_0005863	17	73906009	73907745	-	1736	430	ENSMUSG00000024066;	exon:73906010-73906096,exon:73906204-73906291,exon:73906695-73906828,exon:73907621-73907745	CON_1,CON_2,CON_3,HFD_1,HFD_2,HFD_3,HSD_1,HSD_2,HSD_3	6,5,16,23,5,15,9,16,9	44,58,49,104,50,81,36,66,68	Xdh	CO dehydrogenase flavoprotein, C-terminal domain superfamily||Aldehyde oxidase/xanthine dehydrogenase||2Fe-2S ferredoxin, iron-sulphur binding site||[2Fe-2S]-binding||FAD-binding, type PCMH-like superfamily||Molybdopterin dehydrogenase, FAD-binding||Aldehyde oxidase/xanthine dehydrogenase, a/b hammerhead||Aldehyde oxidase/xanthine dehydrogenase, molybdopterin binding||[2Fe-2S]-binding domain supe…	6	5	16	23	5	15	9	16	9	117.897	84.7013	304.977	323.784	84.2559	284.08	167.876	230.974	178.83	10.4124	9.15202	0.19949	0.76791	0.99849	FALSE	12.9628	9.42976	0.47078	0.4863	0.98087	FALSE	13.3929	11.0939	0.26937	0.65988	0.99144	FALSE
novel_circ_0005860	17	71798956	71810982	+	12026	139	ENSMUSG00000024059;	exon:71798957-71799096	HFD_1	2	4	Clip4	Ankyrin repeat-containing domain superfamily||Ankyrin repeat-containing domain||CAP Gly-rich domain||Ankyrin repeat||CAP Gly-rich domain superfamily||-	0	0	0	2	0	0	0	0	0	0	0	0	28.1551	0	0	0	0	0	0	0	NA	NA	NA	NA	0.534108	0	1.5189	0.70802	0.98087	FALSE	0.557583	0	1.6184	0.68858	0.99144	FALSE
mmu_circ_0000271	11	62146305	62161910	+	15605	586	ENSMUSG00000042331;	exon:62146306-62146451,exon:62147568-62147668,exon:62151870-62151951,exon:62156487-62156640,exon:62161808-62161910	CON_1,CON_2,CON_3,HFD_1,HFD_2,HFD_3,HSD_1,HSD_2,HSD_3	40,24,19,22,17,12,35,46,26	18,17,20,7,6,8,16,23,12	Specc1	CH domain superfamily||Calponin homology domain||-	40	24	19	22	17	12	35	46	26	785.978	406.566	362.16	309.706	286.47	227.264	652.851	664.049	516.621	33.0482	28.1882	0.24046	0.54082	0.98499	FALSE	15.455	28.9791	-0.89383	0.047867	0.98087	TRUE	15.9591	35.2629	-1.1386	0.0048984	0.99144	TRUE
mmu_circ_0000277	11	69649727	69651723	+	1996	825	ENSMUSG00000018765;	exon:69649728-69649837,exon:69650463-69650549,exon:69651523-69651723	CON_1,CON_2,CON_3,HFD_1,HFD_2,HFD_3,HSD_1,HSD_2,HSD_3	39,47,50,56,51,49,29,70,43	60,118,120,87,115,73,95,111,90	Fxr2	K Homology domain||K Homology domain, type 1 superfamily||Agenet-like domain||Fragile X mental retardation syndrome-related protein||Fragile X-related 1 protein, C-terminal core||Fxr1, tudor domain||K Homology domain, type 1||Fragile X-related 1 protein, C-terminal region 1||Synaptic functional regulator FMRP, KH0 domain	39	47	50	56	51	49	29	70	43	766.329	796.192	953.053	788.344	859.411	927.995	540.934	1010.51	854.412	43.3207	45.5	-0.061798	0.84998	0.9996	FALSE	48.231	46.8322	0.039974	0.89124	0.99903	FALSE	49.7257	46.0933	0.097212	0.75521	0.99761	FALSE
novel_circ_0016168	9	65316643	65324299	+	7656	92	ENSMUSG00000015357;	exon:65324207-65324299	HFD_1	6	7	Clpx	Clp protease, ATP-binding subunit ClpX||ATPase, AAA-type, core||P-loop containing nucleoside triphosphate hydrolase||Clp ATPase, C-terminal||AAA+ ATPase domain	0	0	0	6	0	0	0	0	0	0	0	0	84.4654	0	0	0	0	0	0	0	NA	NA	NA	NA	1.60233	0	3.0852	0.43566	0.98087	FALSE	1.67275	0	3.1861	0.42073	0.99144	FALSE
novel_circ_0016167	9	65316643	65318751	+	2108	88	ENSMUSG00000015357;	exon:65318663-65318751	HSD_2	3	24	Clpx	Clp protease, ATP-binding subunit ClpX||ATPase, AAA-type, core||P-loop containing nucleoside triphosphate hydrolase||Clp ATPase, C-terminal||AAA+ ATPase domain	0	0	0	0	0	0	0	3	0	0	0	0	0	0	0	0	43.3075	0	0.800071	0	2.1371	0.59397	0.98499	FALSE	0	0	NA	NA	NA	NA	0	0.844554	-2.2881	0.56827	0.99144	FALSE
novel_circ_0005866	17	74217026	74245087	-	28061	299	ENSMUSG00000058704;	exon:74217027-74217103,exon:74241905-74242016,exon:74244975-74245087	CON_1,CON_2,CON_3,HFD_1,HFD_2,HFD_3,HSD_1,HSD_2,HSD_3	2,7,7,4,6,4,6,5,5	27,22,44,26,32,28,23,27,34	Memo1	MEMO1 family||-	2	7	7	4	6	4	6	5	5	39.2989	118.582	133.427	56.3103	101.107	75.7547	111.917	72.1792	99.3502	5.08389	5.26134	-0.064065	0.94514	0.9996	FALSE	4.3672	5.41999	-0.32459	0.73417	0.98784	FALSE	4.49914	5.43253	-0.2694	0.77446	0.99761	FALSE
novel_circ_0016163	9	65066350	65075888	+	9538	152	ENSMUSG00000032393;	exon:65075736-65075888	CON_3,HFD_1,HFD_2,HFD_3,HSD_1,HSD_2	2,4,6,2,4,7	38,26,40,45,32,75	Dpp8	-||Peptidase S9, prolyl oligopeptidase, catalytic domain||Dipeptidylpeptidase IV, N-terminal domain superfamily||Alpha/Beta hydrolase fold||Dipeptidylpeptidase IV, N-terminal domain	0	0	2	4	6	2	4	7	0	0	0	38.1221	56.3103	101.107	37.8774	74.6116	101.051	0	3.21221	0.683342	2.2508	0.32644	0.98499	FALSE	3.66925	0.705644	2.3944	0.21959	0.98087	FALSE	3.78587	3.42681	0.12373	0.92285	0.99761	FALSE
novel_circ_0016160	9	65034874	65045788	+	10914	304	ENSMUSG00000032393;	exon:65034875-65035011,exon:65045620-65045788	CON_2,HFD_3,HSD_1,HSD_2	3,3,3,5	76,82,32,103	Dpp8	-||Peptidase S9, prolyl oligopeptidase, catalytic domain||Dipeptidylpeptidase IV, N-terminal domain superfamily||Alpha/Beta hydrolase fold||Dipeptidylpeptidase IV, N-terminal domain	0	3	0	0	0	3	3	5	0	0	50.8208	0	0	0	56.816	55.9587	72.1792	0	2.34249	0.923183	1.3258	0.60019	0.98499	FALSE	1.04692	0.949895	0.10708	0.97543	0.99903	FALSE	1.06991	2.49973	-1.2671	0.59894	0.99144	FALSE
novel_circ_0005864	17	73909246	73912540	-	3294	338	ENSMUSG00000024066;	exon:73909247-73909343,exon:73910166-73910285,exon:73912417-73912540	CON_1,HSD_1,HSD_3	4,2,3	33,34,56	Xdh	CO dehydrogenase flavoprotein, C-terminal domain superfamily||Aldehyde oxidase/xanthine dehydrogenase||2Fe-2S ferredoxin, iron-sulphur binding site||[2Fe-2S]-binding||FAD-binding, type PCMH-like superfamily||Molybdopterin dehydrogenase, FAD-binding||Aldehyde oxidase/xanthine dehydrogenase, a/b hammerhead||Aldehyde oxidase/xanthine dehydrogenase, molybdopterin binding||[2Fe-2S]-binding domain supe…	4	0	0	0	0	0	2	0	3	78.5978	0	0	0	0	0	37.3058	0	59.6101	1.71211	1.4311	0.25831	0.92126	0.9996	FALSE	0	1.46763	-3.0986	0.435	0.98087	FALSE	0	1.83249	-3.3724	0.35325	0.99144	FALSE
novel_circ_0015158	8	69291261	69303851	+	12590	249	ENSMUSG00000079038;	intron:69291262-69291322,intron:69300253-69300379,intron:69300758-69300821	HFD_1,HSD_2	6,5	3,5	D130040H23Rik	C2H2-type Zinc finger protein, YY-1-like||Zinc finger protein 781||Zinc finger C2H2-type||Zinc finger C2H2 superfamily	0	0	0	6	0	0	0	5	0	0	0	0	84.4654	0	0	0	72.1792	0	1.33345	0	2.8653	0.47032	0.98499	FALSE	1.60233	0	3.0852	0.43566	0.98087	FALSE	1.67275	1.40759	0.24312	0.94955	0.99761	FALSE
novel_circ_0015157	8	69102450	69103768	+	1318	139	ENSMUSG00000006273;	exon:69102451-69102590	CON_3	3	46	Atp6v1b2	V-type ATP synthase regulatory subunit B/beta||ATPase, F1/V1/A1 complex, alpha/beta subunit, N-terminal domain||ATPase, F1/V1/A1 complex, alpha/beta subunit, nucleotide-binding domain||ATPase, V1 complex, subunit B||ATPase, alpha/beta subunit, nucleotide-binding domain, active site||P-loop containing nucleoside triphosphate hydrolase	0	0	3	0	0	0	0	0	0	0	0	57.1832	0	0	0	0	0	0	0	1.02501	-2.5603	0.52141	0.98499	FALSE	0	1.05847	-2.6303	0.51006	0.98087	FALSE	0	0	NA	NA	NA	NA
novel_circ_0015155	8	68718853	68719494	-	641	410	ENSMUSG00000036356;	exon:68718854-68719157,exon:68719387-68719494	HFD_1,HSD_3	3,7	6,11	Csgalnact1	Chondroitin N-acetylgalactosaminyltransferase||Nucleotide-diphospho-sugar transferases	0	0	0	3	0	0	0	0	7	0	0	0	42.2327	0	0	0	0	139.09	2.42531	0	3.7069	0.29981	0.98499	FALSE	0.801163	0	2.0951	0.6011	0.98087	FALSE	0.836375	2.57692	-1.5993	0.67899	0.99144	FALSE
novel_circ_0015152	8	68329251	68331236	+	1985	309	ENSMUSG00000053886;	exon:68329252-68329360,exon:68331035-68331236	CON_1,CON_2,HFD_1,HSD_2	2,2,2,4	16,57,27,76	Sh2d4a	SH2 domain superfamily||SH2 domain	2	2	0	2	0	0	0	4	0	39.2989	33.8805	0	28.1551	0	0	0	57.7434	0	1.06676	1.33101	-0.28895	0.92238	0.9996	FALSE	0.534108	1.36708	-1.3132	0.68325	0.98087	FALSE	0.557583	1.12607	-1.0059	0.78958	0.99761	FALSE
novel_circ_0015151	8	68294302	68296825	+	2523	327	ENSMUSG00000053886;	exon:68294303-68294459,exon:68296654-68296825	CON_1,CON_2,HFD_1,HFD_2,HFD_3,HSD_3	3,4,2,3,2,4	9,48,19,43,30,22	Sh2d4a	SH2 domain superfamily||SH2 domain	3	4	0	2	3	2	0	0	4	58.9484	67.761	0	28.1551	50.5536	37.8774	0	0	79.4802	1.38589	2.30424	-0.75953	0.7453	0.99602	FALSE	2.1836	2.36725	-0.1255	0.94058	0.99903	FALSE	2.24957	1.47253	0.63596	0.76687	0.99761	FALSE
novel_circ_0002454	12	65136749	65140890	-	4141	157	ENSMUSG00000047534;	exon:65140733-65140890	CON_3,HFD_1,HFD_2,HFD_3,HSD_1,HSD_3	2,4,2,3,10,3	5,1,1,1,3,0	Mis18bp1	Homeobox-like domain superfamily||SANT/Myb domain||KNL2-like||-||SANT associated	0	0	2	4	2	3	10	0	3	0	0	38.1221	56.3103	33.7024	56.816	186.529	0	59.6101	4.40288	0.683342	2.6899	0.28064	0.98499	FALSE	2.7495	0.705644	1.9741	0.38383	0.98087	FALSE	2.83755	4.74487	-0.71784	0.58297	0.99144	FALSE
novel_circ_0004522	15	76063590	76064601	-	1011	289	ENSMUSG00000022568;	exon:76063591-76063755,exon:76064476-76064601	CON_2,HFD_2,HSD_3	5,4,2	75,47,54	Scrib	PDZ superfamily||Leucine-rich repeat||PDZ domain||Leucine-rich repeat domain superfamily||-||Leucine-rich repeat, typical subtype	0	5	0	0	4	0	0	0	2	0	84.7013	0	0	67.4047	0	0	0	39.7401	0.692946	1.53864	-1.1831	0.72663	0.99127	FALSE	1.26872	1.58316	-0.32881	0.93197	0.99903	FALSE	1.30496	0.736264	0.84277	0.81305	0.99761	FALSE
novel_circ_0004445	15	6640440	6652544	+	12104	397	ENSMUSG00000022148;	exon:6640441-6640585,exon:6642557-6642579,exon:6643694-6643763,exon:6652382-6652544	HSD_1	2	0	Fyb	SH3 domain||FYB, helically extended SH3 domain||FYN-binding protein||SH3-like domain superfamily||Helically-extended SH3 domain	0	0	0	0	0	0	2	0	0	0	0	0	0	0	0	37.3058	0	0	0.672692	0	1.8517	0.64596	0.98499	FALSE	0	0	NA	NA	NA	NA	0	0.728095	-2.0346	0.6136	0.99144	FALSE
novel_circ_0008573	2	119624117	119630505	+	6388	382	ENSMUSG00000027306;	exon:119624118-119624186,exon:119627547-119627693,exon:119630337-119630505	CON_2,CON_3,HFD_1,HSD_1,HSD_2	5,2,2,4,4	16,24,9,5,10	Nusap1	Nucleolar and spindle-associated protein 1	0	5	2	2	0	0	4	4	0	0	84.7013	38.1221	28.1551	0	0	74.6116	57.7434	0	2.41214	2.22198	0.11283	0.95092	0.9996	FALSE	0.534108	2.2888	-2.0514	0.46427	0.98087	FALSE	0.557583	2.58226	-2.1605	0.41488	0.99144	FALSE
novel_circ_0005852	17	71436705	71456500	-	19795	202	ENSMUSG00000024054;	exon:71436706-71436826,exon:71456418-71456500	CON_2,CON_3,HFD_1,HFD_2,HSD_2	4,3,3,2,4	23,27,20,15,23	Smchd1	SMCs flexible hinge superfamily||-||Structural maintenance of chromosomes flexible hinge domain-containing protein 1||Histidine kinase/HSP90-like ATPase superfamily||SMCs flexible hinge||Histidine kinase/HSP90-like ATPase	0	4	3	3	2	0	0	4	0	0	67.761	57.1832	42.2327	33.7024	0	0	57.7434	0	1.06676	2.25592	-1.0442	0.6752	0.98499	FALSE	1.43552	2.32499	-0.68322	0.74323	0.99209	FALSE	1.48885	1.12607	0.3784	0.89527	0.99761	FALSE
novel_circ_0008571	2	119560730	119584652	+	23922	122	ENSMUSG00000014077;	exon:119584530-119584652	HSD_1	2	56	Chp1	EF-hand domain||-||EF-Hand 1, calcium-binding site||EF-hand domain pair	0	0	0	0	0	0	2	0	0	0	0	0	0	0	0	37.3058	0	0	0.672692	0	1.8517	0.64596	0.98499	FALSE	0	0	NA	NA	NA	NA	0	0.728095	-2.0346	0.6136	0.99144	FALSE
novel_circ_0005850	17	71394716	71400198	-	5482	366	ENSMUSG00000024054;	exon:71394717-71394944,exon:71400059-71400198	HSD_3	2	26	Smchd1	SMCs flexible hinge superfamily||-||Structural maintenance of chromosomes flexible hinge domain-containing protein 1||Histidine kinase/HSP90-like ATPase superfamily||SMCs flexible hinge||Histidine kinase/HSP90-like ATPase	0	0	0	0	0	0	0	0	2	0	0	0	0	0	0	0	0	39.7401	0.692946	0	1.8892	0.63904	0.98499	FALSE	0	0	NA	NA	NA	NA	0	0.736264	-2.0487	0.61104	0.99144	FALSE
novel_circ_0008577	2	119712008	119721252	+	9244	288	ENSMUSG00000027304;	exon:119712009-119712120,exon:119721075-119721252	CON_2,CON_3,HFD_2,HFD_3,HSD_1,HSD_2,HSD_3	8,9,4,4,2,3,3	37,11,14,10,11,15,17	Rtf1	Plus-3 domain||Plus3-like superfamily	0	8	9	0	4	4	2	3	3	0	135.522	171.549	0	67.4047	75.7547	37.3058	43.3075	59.6101	2.51218	5.53686	-1.1498	0.35168	0.98499	FALSE	2.66462	5.70845	-1.1181	0.53086	0.98087	FALSE	2.7315	2.67704	0.0098742	0.99487	0.99761	FALSE
novel_circ_0008576	2	119701117	119705643	+	4526	351	ENSMUSG00000027304;	exon:119701118-119701265,exon:119705439-119705643	CON_1,HFD_2,HSD_2	3,3,3	4,4,4	Rtf1	Plus-3 domain||Plus3-like superfamily	3	0	0	0	3	0	0	3	0	58.9484	0	0	0	50.5536	0	0	43.3075	0	0.800071	1.07332	-0.38567	0.91409	0.9996	FALSE	0.951542	1.10073	-0.20362	0.95294	0.99903	FALSE	0.978717	0.844554	0.18118	0.96071	0.99761	FALSE
novel_circ_0005855	17	71455604	71465669	-	10065	287	ENSMUSG00000024054;	exon:71455605-71455735,exon:71456418-71456500,exon:71465594-71465669	CON_1,CON_2,CON_3,HFD_1,HFD_2,HFD_3,HSD_1,HSD_2,HSD_3	12,6,19,8,9,6,9,8,3	10,20,20,21,15,15,10,9,13	Smchd1	SMCs flexible hinge superfamily||-||Structural maintenance of chromosomes flexible hinge domain-containing protein 1||Histidine kinase/HSP90-like ATPase superfamily||SMCs flexible hinge||Histidine kinase/HSP90-like ATPase	12	6	19	8	9	6	9	8	3	235.793	101.642	362.16	112.621	151.661	113.632	167.876	115.487	59.6101	6.20005	12.6314	-1.0158	0.15461	0.98499	FALSE	7.08491	13.0063	-0.86937	0.19129	0.98087	FALSE	7.3063	6.63297	0.13751	0.85989	0.99761	FALSE
novel_circ_0008574	2	119691422	119692226	+	804	227	ENSMUSG00000027304;	exon:119691423-119691540,exon:119692116-119692226	HSD_3	2	6	Rtf1	Plus-3 domain||Plus3-like superfamily	0	0	0	0	0	0	0	0	2	0	0	0	0	0	0	0	0	39.7401	0.692946	0	1.8892	0.63904	0.98499	FALSE	0	0	NA	NA	NA	NA	0	0.736264	-2.0487	0.61104	0.99144	FALSE
novel_circ_0008579	2	119782645	119783970	-	1325	325	ENSMUSG00000034032;	exon:119782646-119782735,exon:119783734-119783970	CON_1,HFD_2,HFD_3,HSD_1,HSD_3	7,4,5,5,3	12,13,15,5,23	Rpap1	RNA polymerase II-associated protein RPAP1/Rba50||Armadillo-type fold||RNA polymerase II-associated protein 1, C-terminal||-||RNA polymerase II-associated protein 1, N-terminal	7	0	0	0	4	5	5	0	3	137.546	0	0	0	67.4047	94.6934	93.2644	0	59.6101	2.72115	2.50442	0.1197	0.96599	0.9996	FALSE	3.0136	2.56836	0.23068	0.93457	0.99903	FALSE	3.08813	2.92463	0.083143	0.95834	0.99761	FALSE
novel_circ_0008578	2	119720165	119721252	+	1087	312	ENSMUSG00000027304;	exon:119720166-119720301,exon:119721075-119721252	HSD_2	3	17	Rtf1	Plus-3 domain||Plus3-like superfamily	0	0	0	0	0	0	0	3	0	0	0	0	0	0	0	0	43.3075	0	0.800071	0	2.1371	0.59397	0.98499	FALSE	0	0	NA	NA	NA	NA	0	0.844554	-2.2881	0.56827	0.99144	FALSE
novel_circ_0005431	17	21736057	21743957	+	7900	364	ENSMUSG00000061544;	exon:21736058-21736121,exon:21739435-21739512,exon:21742496-21742622,exon:21743859-21743957	CON_1,CON_2,CON_3,HFD_1,HFD_3,HSD_1,HSD_2,HSD_3	2,7,4,4,4,3,5,8	6,23,20,6,19,10,23,15	Zfp229	KRAB domain superfamily||Zinc finger C2H2 superfamily||Krueppel-associated box||Zinc finger C2H2-type	2	7	4	4	0	4	3	5	8	39.2989	118.582	76.2442	56.3103	0	75.7547	55.9587	72.1792	158.96	5.11427	4.23633	0.2515	0.80301	0.9996	FALSE	2.46411	4.36153	-0.83374	0.52319	0.98087	FALSE	2.54171	5.44479	-1.0952	0.36316	0.99144	FALSE
novel_circ_0012518	5	3769428	3772787	-	3359	445	ENSMUSG00000040351;	exon:3769429-3769604,exon:3772517-3772787	CON_2	5	154	Ankib1	E3 ubiquitin ligase RBR family||Ubiquitin interacting motif||Ankyrin repeat-containing domain||Ankyrin repeat||Zinc finger, RING-type||Ankyrin repeat-containing domain superfamily||IBR domain||Zinc finger, RING/FYVE/PHD-type	0	5	0	0	0	0	0	0	0	0	84.7013	0	0	0	0	0	0	0	0	1.53864	-3.156	0.42596	0.98499	FALSE	0	1.58316	-3.2212	0.41645	0.98087	FALSE	0	0	NA	NA	NA	NA
novel_circ_0004982	16	31805613	31838226	+	32613	452	ENSMUSG00000022770;	exon:31805614-31805734,exon:31812668-31812824,exon:31838050-31838226	CON_2,HFD_2	6,2	66,66	Dlg1	P-loop containing nucleoside triphosphate hydrolase||SH3-like domain superfamily||Guanylate kinase-like domain||SH3 domain||L27 domain superfamily||-||Guanylate kinase/L-type calcium channel beta subunit||Guanylate kinase, conserved site||PDZ superfamily||Disks large homologue 1, N-terminal PEST domain||PDZ-associated domain of NMDA receptors||L27 domain||Disks large 1-like||L27-1||PDZ domain	0	6	0	0	2	0	0	0	0	0	101.642	0	0	33.7024	0	0	0	0	0	1.84637	-3.4179	0.38412	0.98499	FALSE	0.634361	1.89979	-1.5975	0.62039	0.98087	FALSE	0.652478	0	1.8143	0.65303	0.99144	FALSE
novel_circ_0004983	16	31812667	31838226	+	25559	176	ENSMUSG00000022770;	exon:31838050-31838226	HFD_2,HSD_1	2,2	56,30	Dlg1	P-loop containing nucleoside triphosphate hydrolase||SH3-like domain superfamily||Guanylate kinase-like domain||SH3 domain||L27 domain superfamily||-||Guanylate kinase/L-type calcium channel beta subunit||Guanylate kinase, conserved site||PDZ superfamily||Disks large homologue 1, N-terminal PEST domain||PDZ-associated domain of NMDA receptors||L27 domain||Disks large 1-like||L27-1||PDZ domain	0	0	0	0	2	0	2	0	0	0	0	0	0	33.7024	0	37.3058	0	0	0.672692	0	1.8517	0.64596	0.98499	FALSE	0.634361	0	1.7334	0.66753	0.98087	FALSE	0.652478	0.728095	-0.14747	0.97013	0.99761	FALSE
novel_circ_0012512	5	3722545	3734184	-	11639	88	ENSMUSG00000040351;	exon:3722546-3722634	CON_1	2	25	Ankib1	E3 ubiquitin ligase RBR family||Ubiquitin interacting motif||Ankyrin repeat-containing domain||Ankyrin repeat||Zinc finger, RING-type||Ankyrin repeat-containing domain superfamily||IBR domain||Zinc finger, RING/FYVE/PHD-type	2	0	0	0	0	0	0	0	0	39.2989	0	0	0	0	0	0	0	0	0	0.71555	-2.0323	0.61412	0.98499	FALSE	0	0.733817	-2.0934	0.60355	0.98087	FALSE	0	0	NA	NA	NA	NA
novel_circ_0012517	5	3755593	3772787	-	17194	452	ENSMUSG00000040351;	exon:3755594-3755776,exon:3772517-3772787	CON_1,CON_2,CON_3,HFD_1,HFD_2,HFD_3,HSD_1,HSD_2,HSD_3	14,13,21,24,20,19,11,12,12	157,96,170,248,147,180,130,165,138	Ankib1	E3 ubiquitin ligase RBR family||Ubiquitin interacting motif||Ankyrin repeat-containing domain||Ankyrin repeat||Zinc finger, RING-type||Ankyrin repeat-containing domain superfamily||IBR domain||Zinc finger, RING/FYVE/PHD-type	14	13	21	24	20	19	11	12	12	275.092	220.223	400.282	337.862	337.024	359.835	205.182	173.23	238.441	11.0578	16.1844	-0.55233	0.30966	0.98499	FALSE	19.3834	16.6622	0.22219	0.63361	0.98087	FALSE	19.9919	11.8003	0.76832	0.12187	0.99144	FALSE
novel_circ_0012514	5	3722545	3772787	-	50242	524	ENSMUSG00000040351;	exon:3722546-3722634,exon:3727489-3727655,exon:3772517-3772787	CON_1,CON_3,HFD_1,HFD_3,HSD_2	3,4,11,6,3	20,25,24,19,28	Ankib1	E3 ubiquitin ligase RBR family||Ubiquitin interacting motif||Ankyrin repeat-containing domain||Ankyrin repeat||Zinc finger, RING-type||Ankyrin repeat-containing domain superfamily||IBR domain||Zinc finger, RING/FYVE/PHD-type	3	0	4	11	0	6	0	3	0	58.9484	0	76.2442	154.853	0	113.632	0	43.3075	0	0.800071	2.44001	-1.5519	0.54312	0.98499	FALSE	5.03144	2.51201	1.0164	0.56319	0.98087	FALSE	5.20652	0.844554	2.566	0.28285	0.99144	FALSE
novel_circ_0012515	5	37391992	37393196	+	1204	320	ENSMUSG00000050248;	exon:37391993-37392197,exon:37393080-37393196	HSD_2	2	20	Evc2	Limbin||Limbin/Ellis-van Creveld protein	0	0	0	0	0	0	0	2	0	0	0	0	0	0	0	0	28.8717	0	0.53338	0	1.5621	0.70028	0.98499	FALSE	0	0	NA	NA	NA	NA	0	0.563036	-1.7139	0.67182	0.99144	FALSE
novel_circ_0006580	18	80137483	80142769	-	5286	360	ENSMUSG00000053950;	exon:80137484-80137573,exon:80138153-80138304,exon:80142649-80142769	CON_1,CON_2,CON_3,HFD_1,HFD_2,HFD_3,HSD_1,HSD_2,HSD_3	7,7,10,6,5,3,2,3,2	42,39,42,44,29,14,50,41,35	Adnp2	Homeobox domain||Activity-dependent neuroprotector homeobox protein||Zinc finger C2H2-type||Homeobox-like domain superfamily	7	7	10	6	5	3	2	3	2	137.546	118.582	190.611	84.4654	84.2559	56.816	37.3058	43.3075	39.7401	2.16571	8.07523	-1.8904	0.054936	0.98499	FALSE	4.23515	8.313	-0.96081	0.23709	0.98087	FALSE	4.37385	2.30891	0.92231	0.45521	0.99144	FALSE
novel_circ_0006581	18	80283275	80283885	+	610	216	ENSMUSG00000034006;	exon:80283276-80283492	CON_1,HSD_1	4,2	7,18	Pqlc1	PQ-loop repeat	4	0	0	0	0	0	2	0	0	78.5978	0	0	0	0	0	37.3058	0	0	0.672692	1.4311	-1.0957	0.75166	0.9963	FALSE	0	1.46763	-3.0986	0.435	0.98087	FALSE	0	0.728095	-2.0346	0.6136	0.99144	FALSE
novel_circ_0006582	18	80283275	80283893	+	618	361	ENSMUSG00000034006;	exon:80283276-80283492,exon:80283748-80283893	HSD_2	3	21	Pqlc1	PQ-loop repeat	0	0	0	0	0	0	0	3	0	0	0	0	0	0	0	0	43.3075	0	0.800071	0	2.1371	0.59397	0.98499	FALSE	0	0	NA	NA	NA	NA	0	0.844554	-2.2881	0.56827	0.99144	FALSE
novel_circ_0005432	17	22779406	22785948	-	6542	126	ENSMUSG00000117333;	intron:22779407-22779533	CON_2,HSD_3	2,2	0,0	--	-	0	2	0	0	0	0	0	0	2	0	33.8805	0	0	0	0	0	0	39.7401	0.692946	0.615455	0.13588	0.97221	0.9996	FALSE	0	0.633264	-1.9087	0.63725	0.98087	FALSE	0	0.736264	-2.0487	0.61104	0.99144	FALSE
novel_circ_0000519	10	68186025	68243229	-	57204	455	ENSMUSG00000019947;	exon:68186026-68186256,exon:68243004-68243229	CON_1,CON_2,CON_3,HFD_1,HFD_2,HFD_3,HSD_1,HSD_2,HSD_3	21,25,31,30,37,14,31,34,30	23,55,37,48,55,36,31,70,54	Arid5b	-||ARID DNA-binding domain||ARID DNA-binding domain superfamily||AT-rich interactive domain-containing protein 5B	21	25	31	30	37	14	31	34	30	412.639	423.506	590.893	422.327	623.494	265.141	578.24	490.819	596.101	29.8884	25.7983	0.20986	0.57911	0.98499	FALSE	24.633	26.5584	-0.1025	0.80603	0.99903	FALSE	25.4275	31.901	-0.31815	0.42123	0.99144	FALSE
novel_circ_0006585	18	80445885	80460013	-	14128	433	ENSMUSG00000033323;	exon:80445886-80446095,exon:80447424-80447565,exon:80459930-80460013	HFD_3,HSD_2	3,3	15,30	Ctdp1	HAD-like superfamily||FCP1-like phosphatase, phosphatase domain||CTD phosphatase Fcp1||BRCT domain||FCP1 homology domain||Single hybrid motif||HAD superfamily||FCP1-like phosphatase, C-terminal||BRCT domain superfamily	0	0	0	0	0	3	0	3	0	0	0	0	0	0	56.816	0	43.3075	0	0.800071	0	2.1371	0.59397	0.98499	FALSE	1.04692	0	2.4455	0.53951	0.98087	FALSE	1.06991	0.844554	0.29594	0.93497	0.99761	FALSE
novel_circ_0006586	18	80458696	80460013	-	1317	304	ENSMUSG00000033323;	exon:80458697-80458825,exon:80459202-80459295,exon:80459930-80460013	CON_2,HSD_2,HSD_3	4,2,3	29,46,24	Ctdp1	HAD-like superfamily||FCP1-like phosphatase, phosphatase domain||CTD phosphatase Fcp1||BRCT domain||FCP1 homology domain||Single hybrid motif||HAD superfamily||FCP1-like phosphatase, C-terminal||BRCT domain superfamily	0	4	0	0	0	0	0	2	3	0	67.761	0	0	0	0	0	28.8717	59.6101	1.5728	1.23091	0.33486	0.90368	0.9996	FALSE	0	1.26653	-2.901	0.46587	0.98087	FALSE	0	1.66743	-3.2438	0.38318	0.99144	FALSE
novel_circ_0006587	18	80649831	80667160	-	17329	132	ENSMUSG00000033016;	exon:80649832-80649964	CON_2	2	21	Nfatc1	Rel homology domain (RHD), DNA-binding domain superfamily||p53-like transcription factor, DNA-binding||IPT domain||Immunoglobulin E-set||Rel homology dimerisation domain||Rel homology domain (RHD), DNA-binding domain||Immunoglobulin-like fold||Nuclear factor of activated T cells (NFAT)||Nuclear factor of activated T-cells 1	0	2	0	0	0	0	0	0	0	0	33.8805	0	0	0	0	0	0	0	0	0.615455	-1.8435	0.6488	0.98499	FALSE	0	0.633264	-1.9087	0.63725	0.98087	FALSE	0	0	NA	NA	NA	NA
novel_circ_0000515	10	68118250	68128993	-	10743	353	ENSMUSG00000019947;	exon:68118251-68118348,exon:68126699-68126751,exon:68128789-68128993	CON_2,HSD_2	6,5	36,40	Arid5b	-||ARID DNA-binding domain||ARID DNA-binding domain superfamily||AT-rich interactive domain-containing protein 5B	0	6	0	0	0	0	0	5	0	0	101.642	0	0	0	0	0	72.1792	0	1.33345	1.84637	-0.46077	0.90447	0.9996	FALSE	0	1.89979	-3.4835	0.36557	0.98087	FALSE	0	1.40759	-3.0156	0.44743	0.99144	FALSE
novel_circ_0000514	10	68017805	68035951	+	18146	493	ENSMUSG00000037846;	exon:68017806-68017900,exon:68025513-68025619,exon:68026518-68026649,exon:68035789-68035951	CON_1	5	1	Rtkn2	Rhotekin-2||HR1 rho-binding domain||PH-like domain superfamily||-||Anillin homology domain||Pleckstrin homology domain	5	0	0	0	0	0	0	0	0	98.2473	0	0	0	0	0	0	0	0	0	1.78887	-3.3609	0.39563	0.98499	FALSE	0	1.83454	-3.4215	0.37928	0.98087	FALSE	0	0	NA	NA	NA	NA
novel_circ_0000517	10	68126698	68135106	-	8408	368	ENSMUSG00000019947;	exon:68126699-68126751,exon:68128789-68128993,exon:68134994-68135106	HFD_1	3	45	Arid5b	-||ARID DNA-binding domain||ARID DNA-binding domain superfamily||AT-rich interactive domain-containing protein 5B	0	0	0	3	0	0	0	0	0	0	0	0	42.2327	0	0	0	0	0	0	0	NA	NA	NA	NA	0.801163	0	2.0951	0.6011	0.98087	FALSE	0.836375	0	2.1951	0.58373	0.99144	FALSE
novel_circ_0000511	10	67245505	67254583	+	9078	252	ENSMUSG00000037876;	exon:67245506-67245636,exon:67246034-67246156	CON_2	2	46	Jmjd1c	-||JmjC domain	0	2	0	0	0	0	0	0	0	0	33.8805	0	0	0	0	0	0	0	0	0.615455	-1.8435	0.6488	0.98499	FALSE	0	0.633264	-1.9087	0.63725	0.98087	FALSE	0	0	NA	NA	NA	NA
novel_circ_0000510	10	67245505	67249806	+	4301	306	ENSMUSG00000037876;	exon:67245506-67245636,exon:67249630-67249806	HSD_2	2	31	Jmjd1c	-||JmjC domain	0	0	0	0	0	0	0	2	0	0	0	0	0	0	0	0	28.8717	0	0.53338	0	1.5621	0.70028	0.98499	FALSE	0	0	NA	NA	NA	NA	0	0.563036	-1.7139	0.67182	0.99144	FALSE
novel_circ_0000512	10	67578115	67591327	+	13212	79	n/a	intergenic_region:67591248-67591327	HFD_1,HSD_2,HSD_3	3,2,4	3,0,1	--	-	0	0	0	3	0	0	0	2	4	0	0	0	42.2327	0	0	0	28.8717	79.4802	1.91927	0	3.3736	0.33543	0.98499	FALSE	0.801163	0	2.0951	0.6011	0.98087	FALSE	0.836375	2.03556	-1.2444	0.65211	0.99144	FALSE
novel_circ_0014208	7	14607239	14609339	-	2100	383	ENSMUSG00000041596;	exon:14607240-14607320,exon:14608409-14608540,exon:14608673-14608768,exon:14609262-14609339	CON_1,CON_2,CON_3,HFD_1,HFD_2,HFD_3,HSD_1,HSD_2	8,2,5,4,6,12,6,7	66,82,92,91,74,84,57,99	--	-	8	2	5	4	6	12	6	7	0	157.196	33.8805	95.3053	56.3103	101.107	227.264	111.917	101.051	0	3.88491	5.18601	-0.39068	0.72998	0.99206	FALSE	7.159	5.33264	0.41989	0.63284	0.98087	FALSE	7.35223	4.15491	0.7907	0.42423	0.99144	FALSE
novel_circ_0005437	17	24088003	24111117	-	23114	217	ENSMUSG00000024122;	exon:24088004-24088221	CON_1,HFD_3,HSD_1,HSD_3	4,8,6,3	109120114152	Pdpk1	PDK1-type, PH domain||Protein kinase domain||-||PDPK1 family||Protein kinase, ATP binding site||Protein kinase-like domain superfamily||PH-like domain superfamily||Serine/threonine-protein kinase, active site	4	0	0	0	0	8	6	0	3	78.5978	0	0	0	0	151.509	111.917	0	59.6101	3.05749	1.4311	1.1013	0.67319	0.98499	FALSE	2.7918	1.46763	0.92791	0.80812	0.99903	FALSE	2.85309	3.28868	-0.20797	0.94325	0.99761	FALSE
novel_circ_0014204	7	14580933	14598451	-	17518	170	ENSMUSG00000041596;	exon:14580934-14581104	CON_2,HFD_1	2,3	110173	--	-	0	2	0	3	0	0	0	0	0	0	33.8805	0	42.2327	0	0	0	0	0	0	0.615455	-1.8435	0.6488	0.98499	FALSE	0.801163	0.633264	0.34413	0.92696	0.99903	FALSE	0.836375	0	2.1951	0.58373	0.99144	FALSE
novel_circ_0014205	7	14592645	14621233	-	28588	331	ENSMUSG00000041596;	intron:14592646-14592813,intron:14609262-14609339,intron:14621146-14621233	HFD_1	5	118	--	-	0	0	0	5	0	0	0	0	0	0	0	0	70.3878	0	0	0	0	0	0	0	NA	NA	NA	NA	1.33527	0	2.8242	0.47659	0.98087	FALSE	1.39396	0	2.925	0.46093	0.99144	FALSE
novel_circ_0014206	7	14598274	14609339	-	11065	383	ENSMUSG00000041596;	exon:14598275-14598451,exon:14603140-14603190,exon:14607240-14607320,exon:14609262-14609339	HFD_2,HSD_1,HSD_2	4,3,3	72,58,82	--	-	0	0	0	0	4	0	3	3	0	0	0	0	0	67.4047	0	55.9587	43.3075	0	1.80911	0	3.2936	0.35402	0.98499	FALSE	1.26872	0	2.7352	0.49101	0.98087	FALSE	1.30496	1.9367	-0.57857	0.82157	0.99761	FALSE
novel_circ_0014200	7	14578735	14598451	-	19716	176	ENSMUSG00000041596;	exon:14598275-14598451	CON_1,HFD_2,HFD_3,HSD_1,HSD_2,HSD_3	3,3,2,5,8,2	87,94,100,95,121,83	--	-	3	0	0	0	3	2	5	8	2	58.9484	0	0	0	50.5536	37.8774	93.2644	115.487	39.7401	4.5082	1.07332	2.1155	0.20748	0.98499	FALSE	1.64949	1.10073	0.5886	0.83432	0.99903	FALSE	1.69199	4.80864	-1.5474	0.26716	0.99144	FALSE
novel_circ_0014202	7	14578735	14609339	-	30604	548	ENSMUSG00000041596;	exon:14578736-14578906,exon:14603140-14603190,exon:14606566-14606642,exon:14607240-14607320,exon:14608673-14608768,exon:14609262-14609339	CON_1,CON_2,CON_3,HFD_1,HFD_2,HFD_3,HSD_1,HSD_2,HSD_3	91,47,100,77,78,77,85,111,80	6,8,7,3,3,2,2,1,8	--	-	91	47	100	77	78	77	85	111	80	1788.1	796.192	1906.11	1083.97	1314.39	1458.28	1585.5	1602.38	1589.6	85.9099	81.1878	0.085432	0.81809	0.9996	FALSE	72.1743	83.5526	-0.21009	0.59048	0.98087	FALSE	74.3745	91.6431	-0.30656	0.19837	0.99144	FALSE
novel_circ_0008757	2	130806870	130822500	-	15630	358	ENSMUSG00000027309;	exon:130806871-130806948,exon:130810822-130810928,exon:130812845-130812941,exon:130822421-130822500	CON_1,CON_2,CON_3,HFD_1,HFD_2,HFD_3,HSD_1,HSD_3	4,5,11,9,7,8,2,6	23,55,39,45,32,40,28,53	4930402H24Rik	-||Uncharacterized protein C20orf194-like	4	5	11	9	7	8	2	0	6	78.5978	84.7013	209.672	126.698	117.958	151.509	37.3058	0	119.22	2.75153	6.72812	-1.3339	0.23703	0.98499	FALSE	7.41555	6.93184	0.097966	0.89748	0.99903	FALSE	7.64588	2.93689	1.4317	0.16765	0.99144	FALSE
novel_circ_0008756	2	130806870	130814303	-	7433	230	ENSMUSG00000027309;	exon:130810822-130810928,exon:130814179-130814303	HSD_1	2	32	4930402H24Rik	-||Uncharacterized protein C20orf194-like	0	0	0	0	0	0	2	0	0	0	0	0	0	0	0	37.3058	0	0	0.672692	0	1.8517	0.64596	0.98499	FALSE	0	0	NA	NA	NA	NA	0	0.728095	-2.0346	0.6136	0.99144	FALSE
novel_circ_0005587	17	35039200	35042180	-	2980	265	ENSMUSG00000007035;	exon:35039201-35039339,exon:35041470-35041515,exon:35042098-35042180	CON_2,HFD_2,HFD_3,HSD_1,HSD_2	2,2,3,7,3	2,1,2,0,1	Msh5	DNA mismatch repair Msh2-type||DNA mismatch repair protein MutS, C-terminal||DNA mismatch repair protein MutS, core domain superfamily||-||DNA mismatch repair protein MutS, core||DNA mismatch repair protein MutS, clamp||P-loop containing nucleoside triphosphate hydrolase	0	2	0	0	2	3	7	3	0	0	33.8805	0	0	33.7024	56.816	130.57	43.3075	0	3.15449	0.615455	2.3158	0.32673	0.98499	FALSE	1.68128	0.633264	1.3707	0.65161	0.98087	FALSE	1.72238	3.39289	-1.0016	0.56952	0.99144	FALSE
novel_circ_0008754	2	130764452	130770789	-	6337	204	ENSMUSG00000027309;	exon:130764453-130764540,exon:130770672-130770789	HSD_1	5	52	4930402H24Rik	-||Uncharacterized protein C20orf194-like	0	0	0	0	0	0	5	0	0	0	0	0	0	0	0	93.2644	0	0	1.68173	0	3.1802	0.42154	0.98499	FALSE	0	0	NA	NA	NA	NA	0	1.82024	-3.3646	0.39506	0.99144	FALSE
novel_circ_0008753	2	130730788	130740489	-	9701	213	ENSMUSG00000027309;	exon:130730789-130730914,exon:130740401-130740489	HFD_2,HSD_2	2,3	51,51	4930402H24Rik	-||Uncharacterized protein C20orf194-like	0	0	0	0	2	0	0	3	0	0	0	0	0	33.7024	0	0	43.3075	0	0.800071	0	2.1371	0.59397	0.98499	FALSE	0.634361	0	1.7334	0.66753	0.98087	FALSE	0.652478	0.844554	-0.40263	0.9171	0.99761	FALSE
novel_circ_0005580	17	34903013	34903478	+	465	236	ENSMUSG00000013787;	exon:34903014-34903095,exon:34903323-34903478	CON_1,HFD_2,HSD_1	5,6,3	272364305	Ehmt2	Pre-SET domain||Ankyrin repeat-containing domain||Ankyrin repeat-containing domain superfamily||Histone-lysine N-methyltransferase EHMT2||-||SET domain||Ankyrin repeat	5	0	0	0	6	0	3	0	0	98.2473	0	0	0	101.107	0	55.9587	0	0	1.00904	1.78887	-0.82892	0.8301	0.9996	FALSE	1.90308	1.83454	0.056363	0.98823	0.99903	FALSE	1.95743	1.09214	0.85021	0.82546	0.99761	FALSE
[truncated: 10,434 more rows]

## Sheet: Supplementary Table S6
				Supplementary Table S6. CircRNAs gene source
				Sample name	exon（%）	intron（%）	intergenic（%）
				CON-1	96.01	3.41	0.57
				CON-2	95.78	3.53	0.68
				CON-3	96.04	3.42	0.54
				HFD-1	95.6	3.73	0.67
				HFD-2	96.07	3.26	0.67
				HFD-3	96.07	3.25	0.68

## Sheet: Supplementary Table S7
Supplementary Table S7 Summary of SRPBM of all circRNAs
Row.names	circ_type	gene_id	gene_name	gene_type	baseMean	log2FoldChange	lfcSE	stat	pvalue	padj	HFD_1	HFD_2	HFD_3	CON_1	CON_2	CON_3
[truncated: 79 more rows]

## Sheet: Supplementary Table S8
	Supplementary Table S8 Differentially expressed circRNAs
[truncated: 134 more rows]

[truncated: 3 more sheets: Supplementary Table S9, Supplementary Table S10, Supplementary Table S11]
