# Supplementary material for: Effects of maternal high-fat diet on fetal growth, placental nutrient transporters and circular RNA expression profiles
Source: Royal Society of Chemistry journal article supplement (doi:10.1039/d3fo02202a), 2023-01-01
Supplement: d3fo02202a3.pdf [file d3fo02202a3.pdf]

## Effects of maternal high-fat diet on fetal growth, placental nutrient transporters and circular RNAs expression profiles

### Supplementary Figure

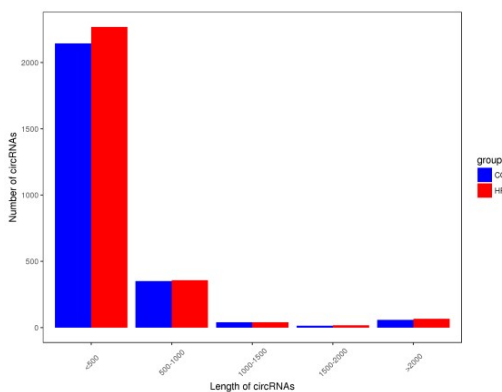

Supplementary Figure 1. The length of circRNAs

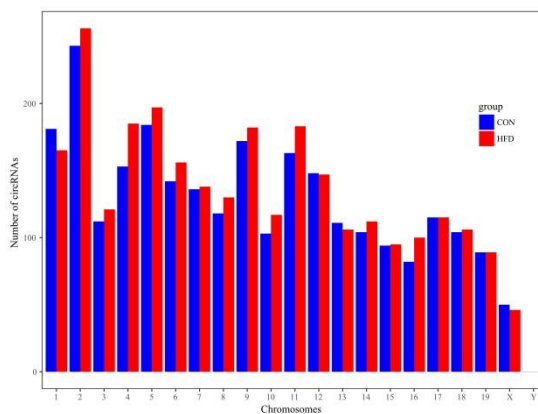

Supplementary Figure 2. Circos diagram of circRNAs
